# Supplementary material
Source: Frontiers journal article supplement (https://www.frontiersin.org/articles/529305)
Supplement: Data_Sheet_1.xlsx [file Data_Sheet_1.xlsx]

## Sheet: U-channel Data
Depth (mcd)	Median Age (ka)	Mean Age (ka)	Age -95.4% (ka)	Age -68.2% (ka)	Age +68.2% (ka)	Age +95.4% (ka)	MS	NRM	ARM	MDFarm	karm/k	b*	MAD (20-60mT)	NRM/ARMslope (20-60 mT)	R-value (20-60 mT)	NRM20/MS
6.67	22.541	22.547	22.428	22.476	22.62	22.693	1.3451e-05	0.00036233	0.0015793	33.1006	2.95002	18.45	3.52	0.202502	0.996199	17.4195
6.68	22.556	22.562	22.441	22.489	22.638	22.712	1.85297e-05	0.00040338	0.0019474	31.174	2.64061	16.64	2.98	0.187576	0.997065	13.7811
6.69	22.568	22.574	22.452	22.501	22.651	22.725	1.80815e-05	0.000438	0.0021443	31.8634	2.97966	14.45	2.57	0.168756	0.997282	15.0385
6.7	22.58	22.586	22.464	22.513	22.663	22.737	2.03063e-05	0.00046741	0.0023692	32.636	2.93148	7.995	2.37	0.160126	0.99629	13.9809
6.71	22.592	22.598	22.475	22.525	22.675	22.75	2.13795e-05	0.00049499	0.002642	30.5994	3.10493	7.11	2.69	0.157006	0.999048	13.9007
6.72	22.604	22.61	22.486	22.536	22.688	22.763	2.38104e-05	0.00053485	0.0027557	31.4869	2.90792	7.13	3.26	0.157803	0.999043	13.8015
6.73	22.617	22.622	22.496	22.547	22.7	22.776	2.09309e-05	0.00061913	0.0029305	32.1563	3.5178	6.24	3.58	0.170569	0.997753	19.3169
6.74	22.629	22.634	22.506	22.559	22.713	22.79	2.22644e-05	0.00075875	0.0032625	32.5679	3.68176	5.84	3.63	0.202817	0.995807	23.6637
6.75	22.641	22.646	22.515	22.57	22.726	22.804	2.33757e-05	0.00096902	0.0035619	35.0537	3.82854	5.44	3.15	0.231974	0.991642	30.7417
6.76	22.653	22.659	22.525	22.581	22.739	22.818	2.77546e-05	0.0012672	0.0040965	39.996	3.70848	5.48	4.23	0.290199	0.970269	36.3292
6.77	22.665	22.671	22.534	22.591	22.752	22.834	2.80178e-05	0.0017389	0.0047009	42.9977	4.21565	5.65	4.06	0.326771	0.971515	48.537
6.78	22.677	22.683	22.543	22.602	22.765	22.849	3.0865e-05	0.0020256	0.005369	43.8346	4.37063	5.55	2.72	0.401645	0.995937	58.4675
6.79	22.689	22.695	22.552	22.613	22.778	22.865	3.54894e-05	0.0022681	0.0059459	46.5369	4.20955	5.51	1.87	0.381202	0.99391	55.1517
6.8	22.701	22.707	22.561	22.623	22.792	22.882	3.92296e-05	0.0023956	0.0062932	47.0138	4.03065	4.2	1.67	0.385166	0.996357	52.7536
6.81	22.713	22.719	22.569	22.633	22.805	22.899	3.98896e-05	0.0025128	0.0062967	47.6168	3.96616	5.82	1.45	0.394984	0.995277	53.3874
6.82	22.724	22.731	22.578	22.643	22.819	22.917	3.39419e-05	0.0024415	0.0062643	48.0092	4.63718	6.19	1.48	0.401031	0.996534	62.6483
6.83	22.736	22.743	22.586	22.653	22.832	22.934	2.91097e-05	0.0023643	0.0061485	48.3518	5.307	6.01	1.54	0.399627	0.996739	70.8252
6.84	22.748	22.755	22.594	22.664	22.846	22.953	2.93216e-05	0.0022219	0.0058679	48.3681	5.0282	6.27	1.6	0.393528	0.996431	65.5456
6.85	22.759	22.767	22.602	22.673	22.859	22.971	3.1303e-05	0.0020242	0.0053929	48.9469	4.32866	5.58	1.77	0.388276	0.996173	55.819
6.86	22.771	22.779	22.61	22.683	22.873	22.989	2.88891e-05	0.0018638	0.0051649	48.1852	4.49205	3.66	1.92	0.379949	0.994921	55.3704
6.87	22.783	22.791	22.618	22.693	22.887	23.008	3.06416e-05	0.0017964	0.0050432	49.0854	4.13534	4.82	2.02	0.36585	0.996089	50.3302
6.88	22.794	22.803	22.626	22.703	22.901	23.027	3.10811e-05	0.0018105	0.0050638	50.0695	4.09352	4.75	2.18	0.368562	0.996138	50.2331
6.89	22.806	22.815	22.634	22.712	22.915	23.046	3.48192e-05	0.0018285	0.0050745	50.6716	3.66177	4.59	2.27	0.373507	0.996003	45.4691
6.9	22.818	22.827	22.642	22.722	22.929	23.065	3.59402e-05	0.0018104	0.0050002	51.031	3.49561	4.51	2.33	0.377535	0.996021	43.8033
6.91	22.829	22.839	22.649	22.732	22.944	23.084	3.70282e-05	0.0017678	0.0048261	51.8267	3.27477	3.99	2.28	0.375933	0.99608	41.598
6.92	22.841	22.851	22.657	22.741	22.958	23.103	3.61421e-05	0.0017831	0.0048241	51.1885	3.35367	4.69	1.96	0.387044	0.996031	42.9333
6.93	22.852	22.863	22.665	22.751	22.972	23.123	4.05493e-05	0.0021579	0.0048285	50.6954	2.99189	5.12	4.44	0.489044	0.995186	46.9329
6.94	22.864	22.875	22.672	22.76	22.987	23.143	4.09878e-05	0.003515	0.0051132	49.5963	3.1344	5.31	3.4	0.78362	0.985614	78.6917
6.95	22.875	22.887	22.68	22.77	23.001	23.163	4.56396e-05	0.0056777	0.0057313	48.0172	3.15521	5.45	5.04	1.0864	0.991756	108.154
6.96	22.887	22.899	22.687	22.779	23.015	23.182	6.34698e-05	0.0072414	0.0065209	48.4439	2.58141	5.04	2.27	1.14951	0.988866	101.433
6.97	22.898	22.911	22.694	22.788	23.03	23.202	0.000117273	0.0082056	0.0072766	47.4863	1.55901	5.77	2.36	1.18897	0.990392	62.5508
6.98	22.91	22.923	22.702	22.798	23.045	23.222	0.000178321	0.0085721	0.0075973	47.2983	1.07047	5.67	1.93	1.20428	0.98745	42.9294
6.99	22.921	22.935	22.709	22.807	23.059	23.242	0.000145947	0.0087941	0.0077477	48.8283	1.33381	5.74	1.99	1.18053	0.991904	53.3899
7	22.933	22.947	22.716	22.816	23.074	23.262	8.99246e-05	0.0085855	0.007878	48.4483	2.20117	5.24	2.09	1.13665	0.990871	85.3871
7.01	22.944	22.959	22.723	22.825	23.089	23.283	5.46612e-05	0.0078473	0.0073837	48.3617	3.394	5.28	1.85	1.12911	0.99132	130.158
7.02	22.956	22.971	22.731	22.835	23.103	23.303	4.1234e-05	0.0061905	0.0061769	48.5893	3.76385	3.91	2.81	1.08201	0.994837	139.317
7.03	22.967	22.983	22.738	22.844	23.118	23.323	3.08455e-05	0.0043297	0.0051602	47.3223	4.20331	5.15	3.63	0.854474	0.990593	119.953
7.04	22.979	22.995	22.745	22.853	23.133	23.344	2.68722e-05	0.0023314	0.003979	46.9814	3.72038	4.7	6.81	0.586558	0.995043	78.3151
7.05	22.99	23.007	22.752	22.863	23.147	23.365	2.9107e-05	0.0013143	0.0031549	44.9323	2.72336	4.45	5.97	0.417277	0.991019	37.7504
7.06	23.002	23.019	22.759	22.872	23.162	23.385	2.84437e-05	0.00080366	0.0026002	42.4509	2.29687	4.4	8.03	0.258578	0.974809	23.479
7.07	23.013	23.031	22.766	22.881	23.177	23.405	2.88594e-05	0.00098365	0.0025857	39.8008	2.25117	4.77	8.5	0.371995	0.98676	28.8786
7.08	23.025	23.043	22.773	22.89	23.192	23.425	2.97724e-05	0.001878	0.0031581	40.0578	2.66519	4.845	3.47	0.544706	0.986153	55.8168
7.09	23.036	23.055	22.78	22.899	23.207	23.446	3.21846e-05	0.0032644	0.0041143	41.8634	3.21192	4.96	1.71	0.761071	0.975813	88.3807
7.1	23.048	23.067	22.787	22.908	23.222	23.466	4.76116e-05	0.0042166	0.0052969	42.9092	2.79528	4.93	2.99	0.766089	0.985724	80.4215
7.11	23.059	23.079	22.794	22.917	23.236	23.486	8.7721e-05	0.0046242	0.006256	43.6379	1.79188	4.53	2.38	0.764098	0.984309	49.1091
7.12	23.071	23.091	22.801	22.926	23.251	23.507	0.000119021	0.0049298	0.0063799	44.1219	1.34681	4.75	1.55	0.725119	0.988884	37.0488
7.13	23.082	23.103	22.808	22.935	23.267	23.528	8.79545e-05	0.0048184	0.0065661	45.0196	1.87571	5.03	1.56	0.708881	0.989727	50.2657
7.14	23.094	23.115	22.815	22.944	23.282	23.548	4.89246e-05	0.0046836	0.0069477	45.1075	3.56805	5.87	1.74	0.671934	0.98802	88.1459
7.15	23.105	23.127	22.822	22.953	23.297	23.569	3.70275e-05	0.0043297	0.0066531	46.8146	4.51458	4.75	1.82	0.650287	0.991037	107.555
7.16	23.116	23.139	22.829	22.962	23.312	23.59	3.6163e-05	0.0035783	0.0058988	48.1968	4.09842	5.16	2.21	0.624027	0.98755	94.3036
7.17	23.128	23.151	22.836	22.971	23.326	23.61	3.32786e-05	0.002677	0.0054249	50.6718	4.09585	4.35	4.61	0.514658	0.997035	73.7923
7.18	23.139	23.163	22.843	22.98	23.341	23.631	3.97002e-05	0.0018902	0.0052961	52.4228	3.35182	4.39	5.06	0.399469	0.983122	43.0754
7.19	23.151	23.175	22.85	22.989	23.356	23.651	5.2442e-05	0.0016203	0.0051623	53.5339	2.47332	4.32	2.36	0.310852	0.982552	26.2919
7.2	23.162	23.187	22.857	22.998	23.372	23.672	5.68899e-05	0.0014586	0.0049766	53.7784	2.19793	4.91	1.89	0.347812	0.998278	24.2468
7.21	23.174	23.199	22.864	23.007	23.387	23.693	5.04998e-05	0.001513	0.0047387	54.3227	2.35769	5.34	1.76	0.365063	0.998923	27.014
7.22	23.185	23.211	22.87	23.015	23.402	23.713	4.38472e-05	0.001475	0.004517	53.4385	2.58837	5.4	1.51	0.371086	0.996286	30.157
7.23	23.197	23.223	22.877	23.024	23.417	23.733	3.61555e-05	0.0013493	0.003955	51.3515	2.74845	4.85	2.28	0.392352	0.992279	32.9936
7.24	23.208	23.235	22.884	23.033	23.432	23.754	3.50556e-05	0.0011027	0.0033656	48.4312	2.41225	5.255	4.07	0.343059	0.975418	27.4159
7.25	23.219	23.247	22.89	23.042	23.447	23.775	3.19646e-05	0.00082684	0.0029033	47.1483	2.28213	5.35	4.49	0.235459	0.95538	19.0057
7.26	23.231	23.259	22.897	23.051	23.462	23.796	3.17304e-05	0.00060996	0.0028462	45.3969	2.25376	4.86	1.83	0.257656	0.996346	17.926
7.27	23.242	23.271	22.904	23.06	23.477	23.817	3.26192e-05	0.00079742	0.0031199	47.1138	2.40317	4.5	2.07	0.267697	0.995995	20.1492
7.28	23.254	23.283	22.911	23.069	23.492	23.838	3.41593e-05	0.001213	0.0039356	49.6636	2.8948	4.5	1.95	0.313903	0.996259	30.2963
7.29	23.265	23.295	22.917	23.078	23.507	23.859	3.52641e-05	0.0019998	0.0051256	54.6712	3.65199	4.67	3.3	0.431698	0.994472	50.4479
7.3	23.276	23.307	22.924	23.087	23.522	23.879	4.01448e-05	0.0027196	0.0066118	56.1988	4.13816	5.43	2.85	0.441371	0.99381	61.318
7.31	23.288	23.319	22.93	23.096	23.537	23.9	4.85196e-05	0.0032758	0.0082005	58.0472	4.24659	5.92	2.5	0.434734	0.991056	58.8587
7.32	23.299	23.331	22.937	23.104	23.552	23.921	6.54959e-05	0.0035235	0.0089767	58.8089	3.44366	4.58	2.79	0.446541	0.996701	50.1177
7.33	23.311	23.343	22.944	23.113	23.567	23.941	6.61236e-05	0.00375	0.0093257	58.2272	3.54358	4.8	2.54	0.447879	0.997655	51.1905
7.34	23.322	23.355	22.95	23.122	23.582	23.962	5.24638e-05	0.0037865	0.0094022	58.5074	4.50284	4.14	2.29	0.4434	0.999023	65.5214
7.35	23.334	23.367	22.957	23.131	23.597	23.983	4.34207e-05	0.003647	0.0091001	58.1625	5.26583	4.63	2.33	0.434947	0.99851	75.8924
7.36	23.345	23.379	22.964	23.14	23.612	24.003	4.0783e-05	0.0032748	0.0079164	56.9922	4.87714	4.31	2.35	0.434691	0.998105	72.0815
7.37	23.357	23.391	22.97	23.148	23.627	24.024	4.27877e-05	0.002735	0.0065438	55.3825	3.84263	4.36	3.01	0.425603	0.993158	57.5423
7.38	23.368	23.403	22.977	23.157	23.643	24.045	4.01403e-05	0.0022394	0.0055907	51.4319	3.49948	4.57	3.91	0.410227	0.992674	49.1726
7.39	23.38	23.415	22.983	23.166	23.657	24.066	4.32177e-05	0.0021725	0.0050033	47.6815	2.90878	5.02	3.46	0.417253	0.99454	43.9148
7.4	23.391	23.427	22.99	23.175	23.673	24.086	4.71834e-05	0.0022889	0.0049069	45.428	2.61297	4.75	2.52	0.432407	0.991511	42.4005
7.41	23.402	23.439	22.997	23.184	23.688	24.107	5.51147e-05	0.0026521	0.0050874	43.9087	2.31924	5.28	2.33	0.478144	0.992059	42.1267
7.42	23.414	23.451	23.003	23.192	23.703	24.128	6.59171e-05	0.0032574	0.0055083	43.3004	2.0996	5.42	2.35	0.52215	0.992013	42.0392
7.43	23.425	23.463	23.01	23.201	23.718	24.149	6.28138e-05	0.0036004	0.0062166	42.7805	2.48665	5.35	3.33	0.534708	0.986665	50.9951
7.44	23.437	23.475	23.016	23.21	23.733	24.17	6.59158e-05	0.0038002	0.0067606	43.4729	2.57699	4.94	3.89	0.525422	0.993816	52.5003
7.45	23.448	23.487	23.023	23.219	23.748	24.191	7.36269e-05	0.0037558	0.0065722	43.2756	2.2428	5.2	2.54	0.524149	0.991821	45.4317
7.46	23.46	23.499	23.029	23.227	23.764	24.212	6.12902e-05	0.0034684	0.0060701	43.5022	2.48841	6.48	2.61	0.519511	0.991753	50.2772
7.47	23.471	23.511	23.035	23.236	23.779	24.233	4.1006e-05	0.0030422	0.0057762	42.8543	3.53925	4.94	2.57	0.500119	0.992901	65.9879
7.48	23.483	23.523	23.042	23.245	23.794	24.254	3.28332e-05	0.0025794	0.005076	42.1124	3.88441	4.7	3.63	0.501407	0.981618	66.9201
7.49	23.494	23.535	23.049	23.254	23.809	24.275	3.15077e-05	0.001964	0.0041074	41.3727	3.27542	4.5	5.67	0.453901	0.981523	56.0783
7.5	23.506	23.547	23.055	23.262	23.824	24.296	3.87986e-05	0.0013253	0.0034597	39.8649	2.24047	4.42	7.68	0.396639	0.977793	29.3026
7.51	23.517	23.559	23.062	23.271	23.839	24.317	5.92772e-05	0.0010093	0.0031753	40.4687	1.3459	4.32	6.09	0.249061	0.973487	12.605
7.52	23.529	23.571	23.069	23.28	23.855	24.338	9.56685e-05	0.0010075	0.0034041	42.2969	0.894026	4.82	3.09	0.30075	0.995246	8.66806
7.53	23.54	23.583	23.075	23.288	23.87	24.358	0.000139526	0.0014831	0.0042401	47.2114	0.76355	5.98	2.29	0.356325	0.997633	9.13592
7.54	23.552	23.595	23.081	23.297	23.885	24.379	0.000131364	0.0022534	0.0058112	49.4088	1.11149	8.31	2.86	0.453976	0.996549	15.671
7.55	23.563	23.607	23.088	23.306	23.9	24.4	9.3914e-05	0.0033108	0.0073636	52.5673	1.97005	12.55	2.91	0.469604	0.995029	30.3373
7.56	23.575	23.619	23.094	23.314	23.916	24.421	8.11337e-05	0.0039675	0.0089771	52.8036	2.78004	8.5	3.68	0.485234	0.997606	44.6756
7.57	23.586	23.631	23.101	23.323	23.931	24.441	8.22279e-05	0.0045635	0.010041	53.6803	3.06814	7.14	3.83	0.474856	0.996191	49.0186
7.58	23.598	23.643	23.107	23.332	23.946	24.462	8.20063e-05	0.0047587	0.010512	53.9477	3.22074	7.74	2.48	0.504323	0.996881	53.0386
7.59	23.609	23.655	23.114	23.34	23.961	24.482	7.05428e-05	0.0048406	0.010348	53.7136	3.68571	6.29	2.12	0.504859	0.998265	61.4478
7.6	23.62	23.667	23.121	23.349	23.976	24.503	5.46764e-05	0.004689	0.0096623	53.5082	4.44015	5.3	2.14	0.531843	0.997935	77.763
7.609	23.6308	23.6778	23.1264	23.3562	23.9895	24.5219	3.12985e-05	0.0034152	0.0058931	29.4592	4.73082	6.33	2.87	0.547679	0.990119	79.106
7.619	23.6428	23.6898	23.1333	23.3651	24.0045	24.542	3.41537e-05	0.0028042	0.0057038	28.8052	4.19607	7.32	5.97	0.446219	0.991361	55.9968
7.629	23.6539	23.7018	23.1394	23.3741	24.0195	24.5629	5.4001e-05	0.0025462	0.0055961	28.5633	2.60376	7.36	5.49	0.417282	0.996996	31.7791
7.639	23.6658	23.7138	23.1463	23.3831	24.0345	24.5839	6.76504e-05	0.0025527	0.0056201	28.9711	2.08733	7.41	3.73	0.397895	0.996294	24.7774
7.649	23.6769	23.7258	23.1524	23.3912	24.0504	24.6049	5.11462e-05	0.0027281	0.0058817	29.815	2.88939	7.27	2.96	0.423846	0.997725	36.8766
7.659	23.6879	23.7378	23.1584	23.4001	24.0655	24.625	3.39471e-05	0.0028874	0.0062225	31.6369	4.60553	9.83	2.61	0.437768	0.998614	60.7446
7.669	23.6998	23.7498	23.1653	23.4091	24.0805	24.6459	2.42504e-05	0.0029594	0.0065084	35.313	6.7433	9.65	2.26	0.432926	0.999054	91.4665
7.679	23.7109	23.7618	23.1714	23.4181	24.0955	24.6669	2.29187e-05	0.0031805	0.007051	39.4074	7.72995	7.89	1.88	0.43944	0.999203	106.947
7.689	23.7228	23.7729	23.1783	23.4262	24.1105	24.687	2.48864e-05	0.0037765	0.0082459	43.8964	8.32516	5.36	2.9	0.456505	0.998812	122.268
7.699	23.7339	23.7848	23.1844	23.4351	24.1264	24.707	3.19484e-05	0.005081	0.01022	46.8267	8.03747	5.09	2.77	0.491656	0.997653	129.656
7.709	23.7458	23.7968	23.1913	23.4441	24.1415	24.7279	4.2517e-05	0.0072988	0.012821	49.0872	7.57664	5.11	2.71	0.558455	0.999512	140.939
7.719	23.7569	23.8088	23.1974	23.4531	24.1565	24.7489	4.95951e-05	0.0095874	0.016051	50.0531	8.13168	5.86	2.52	0.58718	0.999576	160.982
7.729	23.7688	23.8208	23.2034	23.4612	24.1715	24.769	6.21578e-05	0.011206	0.018794	51.224	7.59698	5.6	2.23	0.583609	0.999511	151.928
7.739	23.7799	23.8328	23.2103	23.4701	24.1865	24.7899	8.48552e-05	0.011961	0.020562	52.1252	6.08841	5.57	2.33	0.58324	0.999073	121.053
7.749	23.7918	23.8448	23.2164	23.4782	24.2015	24.81	0.000108656	0.011939	0.020792	52.2908	4.80793	6.18	1.39	0.575002	0.999809	94.3433
7.759	23.8029	23.8568	23.2224	23.4871	24.2174	24.83	0.000115053	0.011398	0.019678	52.5077	4.29734	5.21	1.46	0.581649	0.999668	85.3424
7.769	23.8148	23.8688	23.2293	23.4961	24.2325	24.85	8.13341e-05	0.010297	0.017577	52.7025	5.42986	6.06	1.73	0.581258	0.999725	109.276
7.779	23.8259	23.8808	23.2354	23.5042	24.2475	24.8709	4.6067e-05	0.0085272	0.014843	52.3706	8.0956	6.27	2.08	0.581149	0.999374	163.36
7.789	23.8378	23.8928	23.2423	23.5131	24.2634	24.891	3.06337e-05	0.0062307	0.011425	51.6406	9.37073	5.86	3.65	0.548856	0.999638	179.802
7.799	23.8489	23.9048	23.2484	23.5221	24.2785	24.911	2.09525e-05	0.0040836	0.0084894	49.7569	10.1802	7.82	5.18	0.442012	0.998001	165.522
7.809	23.8608	23.9159	23.2544	23.5311	24.2935	24.931	2.00516e-05	0.0024045	0.0068568	47.4433	8.5919	9.9	8.94	0.338651	0.99601	105.942
7.819	23.8719	23.9278	23.2613	23.5392	24.3085	24.951	2.06922e-05	0.0017635	0.0062122	44.8826	7.54319	8.46	9.28	0.232188	0.974731	70.1519
7.829	23.8829	23.9398	23.2674	23.5481	24.3244	24.9701	2.99978e-05	0.0015602	0.0060324	44.751	5.05264	6.76	7.67	0.22529	0.999123	42.3165
7.839	23.8948	23.9518	23.2734	23.5571	24.3395	24.9891	4.03358e-05	0.0015678	0.0062593	44.2474	3.89899	5.79	6.22	0.217449	0.997679	31.1113
7.849	23.9059	23.9638	23.2803	23.5652	24.3545	25.009	4.38695e-05	0.0017825	0.0068685	44.746	3.93384	5.74	2.72	0.228374	0.999333	32.1955
7.859	23.9178	23.9758	23.2864	23.5741	24.3695	25.029	3.21546e-05	0.0022783	0.0076618	46.8319	5.98693	6.25	2.88	0.25304	0.999633	57.1209
7.869	23.9298	23.9878	23.2933	23.5831	24.3845	25.0481	2.71022e-05	0.0031471	0.0087471	50.4118	8.10917	4.19	4.16	0.311429	0.996059	96.7338
7.879	23.9409	23.9998	23.2994	23.5921	24.3995	25.0671	2.79798e-05	0.0039006	0.010085	52.3419	9.05623	4.02	4.67	0.300764	0.996227	114.154
7.889	23.9519	24.0109	23.3063	23.6002	24.4145	25.087	3.41563e-05	0.0042195	0.011416	54.6605	8.3977	4.44	3.42	0.323377	0.994553	107.93
7.899	23.9638	24.0228	23.3124	23.6091	24.4304	25.1061	6.194e-05	0.004589	0.01203	54.8844	4.8799	4.52	6.47	0.317057	0.995392	63.3645
7.909	23.9758	24.0348	23.3184	23.6181	24.4455	25.1251	7.44914e-05	0.0047803	0.012386	55.4963	4.17775	4.1	4.69	0.330779	0.996624	55.7017
7.919	23.9869	24.0468	23.3253	23.6262	24.4605	25.1441	6.32308e-05	0.0049899	0.012662	55.1785	5.03142	5.08	4.43	0.342965	0.994148	68.911
7.929	23.9979	24.0588	23.3314	23.6351	24.4755	25.1631	4.03196e-05	0.0048732	0.012375	54.5616	7.71163	5.65	4.39	0.339174	0.997282	104.398
7.939	24.0098	24.0699	23.3383	23.6441	24.4905	25.1821	3.81274e-05	0.0044774	0.010895	53.2375	7.17971	6.32	4.34	0.362301	0.998818	101.061
7.949	24.0218	24.0818	23.3444	23.6522	24.5055	25.202	3.43927e-05	0.0037373	0.0092945	50.1019	6.79011	6.98	4.86	0.333104	0.998287	89.929
7.959	24.0329	24.0938	23.3504	23.6611	24.5214	25.2211	3.128e-05	0.0028856	0.0080534	47.5574	6.46889	6.28	7.15	0.311282	0.994332	76.8351
7.969	24.0448	24.1058	23.3573	23.6701	24.5365	25.2392	3.10706e-05	0.0024474	0.0072109	45.5124	5.83119	6.73	6.53	0.291965	0.997051	65.0616
7.979	24.0559	24.1178	23.3634	23.6782	24.5515	25.2572	3.52457e-05	0.0023249	0.0068475	44.2736	4.88138	9.22	3.53	0.302088	0.996636	53.4505
7.989	24.0678	24.1289	23.3703	23.6871	24.5665	25.2761	3.7234e-05	0.0022828	0.0065702	45.0555	4.4336	6.73	1.88	0.316774	0.999028	49.9168
7.999	24.0789	24.1408	23.3764	23.6961	24.5815	25.2942	4.0545e-05	0.0023312	0.0064837	46.0366	4.01793	6.8	1.55	0.33905	0.999253	47.4559
8.009	24.0908	24.1528	23.3824	23.7042	24.5965	25.3122	4.38614e-05	0.0023775	0.0063709	47.7827	3.64952	5.02	1.35	0.359092	0.9994	45.4751
8.019	24.1019	24.1639	23.3893	23.7131	24.6124	25.3302	4.56271e-05	0.0023399	0.0061439	49.5367	3.38328	4.17	1.14	0.377968	0.999346	43.5881
8.029	24.1129	24.1758	23.3954	23.7221	24.6275	25.3482	4.47414e-05	0.0022106	0.0056089	50.8804	3.14982	4.64	0.88	0.398887	0.998797	42.4327
8.039	24.1248	24.1878	23.4023	23.7302	24.6425	25.3644	4.14088e-05	0.0020276	0.0049881	51.5756	3.02663	5.55	3.43	0.401555	0.99796	40.3682
8.049	24.1359	24.1989	23.4084	23.7391	24.6575	25.3822	2.79718e-05	0.0017098	0.0043843	50.8237	3.93819	4.88	3.39	0.416055	0.993872	54.9196
8.059	24.1478	24.2108	23.4144	23.7481	24.6725	25.3984	2.04971e-05	0.0014119	0.0037039	49.0002	4.5403	4.23	7.21	0.398889	0.994197	60.638
8.069	24.1589	24.2228	23.4213	23.7562	24.6875	25.4153	2.26855e-05	0.0011714	0.0029218	49.6186	3.23607	4.33	9.45	0.330703	0.988803	43.1451
8.079	24.1708	24.2339	23.4274	23.7651	24.7025	25.4305	2.35853e-05	0.00081078	0.0025185	44.1005	2.68298	8.55	7.76	0.291376	0.983557	27.3166
8.089	24.1819	24.2458	23.4343	23.7741	24.7184	25.4473	2.42369e-05	0.00079749	0.0022583	41.3956	2.34111	5.4	3.07	0.29045	0.995462	25.5912
8.099	24.1938	24.2578	23.4404	23.7822	24.7335	25.4634	2.29245e-05	0.00099127	0.0023919	43.6317	2.62156	6.66	3.14	0.325737	0.998398	34.4395
8.109	24.2049	24.2689	23.4464	23.7911	24.7476	25.4785	1.9617e-05	0.001302	0.0026867	46.4458	3.44115	6.26	2.32	0.390634	0.997516	55.4009
8.119	24.2168	24.2808	23.4533	23.8001	24.7634	25.4935	2.62308e-05	0.001546	0.0030484	49.5914	2.91996	4.76	2.1	0.417067	0.997118	50.4978
8.129	24.2279	24.2919	23.4594	23.8082	24.7785	25.5085	3.39365e-05	0.0016615	0.00341	50.4352	2.52467	4.68	1.76	0.403723	0.996497	42.7652
8.139	24.2398	24.3038	23.4654	23.8171	24.7926	25.5244	4.36305e-05	0.0017498	0.0037653	52.2002	2.16833	5.74	1.5	0.402786	0.996816	35.2574
8.149	24.2509	24.3149	23.4723	23.8252	24.8075	25.5404	3.98688e-05	0.002041	0.0043686	50.3581	2.75313	5.21	1.39	0.400424	0.99811	42.8305
8.159	24.2628	24.3268	23.4784	23.8341	24.8225	25.5555	2.99708e-05	0.0022712	0.0049719	52.9237	4.16812	3.86	3.23	0.460222	0.997625	69.0805
8.169	24.2739	24.3379	23.4853	23.8431	24.8375	25.5705	2.81866e-05	0.0026251	0.0057859	54.5572	5.15757	4.42	3.33	0.422498	0.995822	81.3223
8.179	24.2858	24.3498	23.4914	23.8512	24.8525	25.5846	2.95283e-05	0.0027984	0.00682	54.7123	5.80314	4.1	3.19	0.403352	0.999415	82.8663
8.189	24.2969	24.3609	23.4974	23.8601	24.8666	25.5968	4.18813e-05	0.002918	0.0076292	55.1914	4.57695	6.68	1.49	0.377612	0.998729	60.342
8.199	24.3079	24.3728	23.5043	23.8691	24.8815	25.6106	5.90694e-05	0.0033208	0.0082905	54.772	3.52643	4.52	2.8	0.410304	0.996942	50.72
8.209	24.3198	24.3839	23.5104	23.8772	24.8965	25.6264	6.56802e-05	0.0041941	0.0089745	54.3344	3.43315	4.84	5.39	0.421538	0.997212	55.7855
8.219	24.3309	24.3958	23.5173	23.8861	24.9115	25.6388	5.79558e-05	0.0049656	0.0096385	53.122	4.17859	4.38	4.24	0.467126	0.997345	74.298
8.229	24.3428	24.4069	23.5234	23.8951	24.9256	25.6517	6.08299e-05	0.005061	0.0096242	52.3288	3.97525	4.13	3.55	0.465733	0.99892	74.0228
8.239	24.3539	24.4179	23.5303	23.9032	24.9405	25.6647	8.17757e-05	0.0048765	0.0089281	51.1029	2.74316	4.46	1.62	0.478357	0.99843	53.3043
8.249	24.3658	24.4298	23.5364	23.9121	24.9546	25.6777	9.14801e-05	0.0044983	0.0081017	50.3474	2.22519	4.28	1.76	0.458631	0.996625	43.98
8.259	24.3769	24.4409	23.5424	23.9202	24.9686	25.6916	6.30405e-05	0.0040166	0.0075684	48.0596	3.01649	4.17	1.84	0.441189	0.997151	58.345
8.339	24.4688	24.5308	23.5924	23.9901	25.0836	25.7917	2.82378e-05	0.00023471	0.0017582	29.363	1.56442	7.86	2.66	0.104049	0.997806	5.65412
8.349	24.4808	24.5419	23.5984	23.9982	25.0976	25.8056	2.90935e-05	0.00025365	0.0019071	28.3778	1.647	6.35	2.63	0.113945	0.997917	5.95356
8.359	24.4919	24.5529	23.6053	24.0071	25.1116	25.8169	2.62357e-05	0.0002803	0.0018711	29.7612	1.79193	7.39	2.63	0.122977	0.9984	7.48255
8.369	24.5029	24.5639	23.6114	24.0161	25.1265	25.827	2.44432e-05	0.00032937	0.0019248	30.2405	1.97854	7.31	2.77	0.139926	0.999036	9.86329
8.379	24.5148	24.5749	23.6174	24.0242	25.1397	25.8397	2.55571e-05	0.00043438	0.0020211	30.726	1.98697	8.64	2.64	0.167597	0.993868	13.0648
8.389	24.5259	24.5859	23.6243	24.0331	25.1536	25.8518	2.71179e-05	0.00065837	0.0021808	30.9607	2.02058	7.6	2.11	0.240402	0.993234	19.5871
8.399	24.5378	24.5969	23.6304	24.0421	25.1667	25.8629	2.53823e-05	0.0010492	0.0025158	31.4209	2.49036	7.1	1.82	0.31668	0.990895	32.0656
8.409	24.5489	24.6079	23.6364	24.0502	25.1806	25.8739	2.95574e-05	0.0013284	0.0028105	32.6005	2.3891	6.68	5.36	0.401532	0.975965	37.8619
8.419	24.5608	24.6189	23.6424	24.0591	25.1946	25.8849	3.79045e-05	0.0017853	0.0033994	31.3059	2.25335	5.86	6.2	0.421535	0.984696	38.5205
8.429	24.5719	24.6299	23.6493	24.0681	25.2077	25.8959	5.42152e-05	0.0023813	0.004017	33.1578	1.86165	5.84	5.36	0.486864	0.997196	35.7796
8.439	24.5838	24.64	23.6554	24.0771	25.2207	25.906	6.54708e-05	0.0032135	0.004796	32.8491	1.84055	8.84	3.92	0.537779	0.995712	36.3902
8.449	24.5949	24.6509	23.6614	24.0852	25.2346	25.916	7.03354e-05	0.0036432	0.005733	33.3055	2.04798	8.28	3.21	0.508672	0.999636	38.824
8.459	24.6068	24.6619	23.6674	24.0941	25.2477	25.926	7.69384e-05	0.003973	0.0062133	33.2062	2.02907	11.07	2.56	0.501021	0.997717	37.4676
8.469	24.6179	24.6729	23.6743	24.1031	25.2616	25.936	9.67711e-05	0.0039104	0.0062273	33.427	1.61685	10.49	2.21	0.506013	0.999749	29.3931
8.479	24.6298	24.6839	23.6804	24.1112	25.2747	25.946	0.000100093	0.0037776	0.0061807	33.1075	1.5515	9.26	2.39	0.50343	0.999729	26.9819
8.489	24.6409	24.694	23.6864	24.1201	25.2877	25.9578	6.92148e-05	0.0035279	0.0060565	32.5728	2.19857	7.31	2.59	0.494925	0.999633	36.1065
8.499	24.6528	24.7049	23.6933	24.1291	25.3007	25.9671	5.09046e-05	0.0031474	0.0054296	32.2651	2.67995	12.4	2.64	0.492836	0.999434	43.3988
8.509	24.6639	24.7159	23.6994	24.1372	25.3137	25.9761	4.65096e-05	0.0023895	0.0045379	30.3379	2.45148	7.27	2.38	0.512093	0.998774	38.7984
8.519	24.6758	24.726	23.7054	24.1461	25.3267	25.986	4.84923e-05	0.001716	0.0035907	29.4247	1.86047	8.1	7.13	0.446784	0.993782	26.5032
8.529	24.6869	24.7369	23.7123	24.1551	25.3388	25.996	3.76954e-05	0.0011261	0.0030155	28.7389	2.00996	8.81	9.73	0.384637	0.986768	24.4454
8.539	24.6988	24.7479	23.7184	24.1641	25.3508	26.006	3.2638e-05	0.00074985	0.0026194	27.0493	2.01649	6.35	2.07	0.335462	0.993669	18.8942
8.549	24.7099	24.758	23.7253	24.1722	25.3637	26.0169	2.93236e-05	0.00063521	0.0021739	28.5851	1.86268	8.82	2.29	0.277657	0.989446	16.0557
8.559	24.7218	24.7689	23.7314	24.1811	25.3758	26.027	3.04082e-05	0.0004754	0.0019662	28.0116	1.62463	6.87	2.74	0.230618	0.99581	11.3085
8.569	24.7329	24.779	23.7374	24.1901	25.3878	26.037	2.77864e-05	0.00035244	0.0017111	30.111	1.54725	7.6	3.38	0.183539	0.998666	8.95438
8.579	24.7448	24.7899	23.7443	24.1991	25.3998	26.0461	2.90905e-05	0.00029026	0.0016736	29.5474	1.4455	6.84	3.75	0.141377	0.998888	6.83075
8.589	24.7559	24.8	23.7504	24.2081	25.4118	26.056	3.17415e-05	0.00027056	0.0016193	29.702	1.28179	6.28	4.16	0.131477	0.998222	5.68782
8.599	24.7678	24.8109	23.7564	24.2171	25.4238	26.0651	3.48323e-05	0.0002665	0.0015859	29.7167	1.14396	7.45	4.15	0.131246	0.997881	5.04876
8.609	24.7789	24.821	23.7633	24.2252	25.4349	26.075	3.28335e-05	0.00026295	0.0015784	29.8018	1.20786	9.02	4.19	0.130381	0.997861	5.24739
8.619	24.7908	24.8319	23.7694	24.2341	25.4468	26.0841	3.1535e-05	0.00026622	0.0016143	30.2975	1.2862	7.08	4.79	0.130148	0.998042	5.56303
8.629	24.8019	24.842	23.7763	24.2431	25.4588	26.0922	2.62385e-05	0.00030119	0.0017229	31.412	1.64983	6.58	4.72	0.143328	0.999175	7.97989
8.639	24.8138	24.8529	23.7824	24.2521	25.4699	26.1011	2.62439e-05	0.00039282	0.0019242	33.3747	1.84221	6.37	3.75	0.175147	0.999014	11.0075
8.649	24.8249	24.863	23.7893	24.2602	25.4809	26.1092	2.42795e-05	0.00053289	0.0022224	35.5505	2.29985	5.99	2.98	0.217753	0.995942	16.948
8.659	24.8368	24.873	23.7954	24.2691	25.4928	26.1172	2.71208e-05	0.00067617	0.0026857	36.9213	2.48812	6.53	2.48	0.228899	0.991739	19.9643
8.669	24.8479	24.8839	23.8023	24.2781	25.5048	26.1261	2.88735e-05	0.00079177	0.00311	40.1842	2.70631	15.16	2.31	0.24931	0.997858	22.0559
8.679	24.8589	24.894	23.8084	24.2871	25.5159	26.1342	3.26108e-05	0.00089209	0.0033588	40.5816	2.58786	6.1	2.18	0.245224	0.995768	22.0105
8.689	24.8708	24.904	23.8144	24.2961	25.5269	26.1422	3.17472e-05	0.0010295	0.0038088	40.5084	3.0144	7.3	2.32	0.263584	0.99655	25.9019
8.699	24.8819	24.914	23.8213	24.3051	25.5379	26.1502	2.95416e-05	0.0012059	0.0041571	43.3927	3.53568	6.13	2.49	0.266764	0.99851	32.5798
8.709	24.8938	24.9249	23.8274	24.3141	25.5489	26.1582	2.86616e-05	0.0013857	0.0047508	42.7534	4.16469	6.43	2.58	0.274578	0.997903	38.8987
8.719	24.9049	24.935	23.8343	24.3231	25.5599	26.1662	3.24067e-05	0.0015655	0.0053931	44.5961	4.18139	6.21	2.76	0.278772	0.999029	39.2326
8.729	24.9168	24.945	23.8404	24.3321	25.5709	26.1742	3.52697e-05	0.0019779	0.0064155	45.0596	4.57031	6.04	2.4	0.288217	0.998878	43.7656
8.739	24.9279	24.955	23.8473	24.3411	25.5819	26.1822	4.14654e-05	0.0025333	0.0078116	46.8326	4.73337	6.4	2	0.3606	0.998584	53.5747
8.749	24.9398	24.965	23.8534	24.3501	25.5929	26.1902	4.34212e-05	0.0036837	0.01004	48.0556	5.80964	4.79	3.65	0.402621	0.999418	72.6927
8.759	24.9518	24.975	23.8603	24.3591	25.6039	26.1982	4.38638e-05	0.0047281	0.01257	49.2686	7.20021	7.29	4.15	0.409124	0.998374	94.7477
8.769	24.9629	24.9859	23.8664	24.3681	25.614	26.2062	5.13635e-05	0.0057465	0.015015	49.5142	7.34494	5.33	3.75	0.408181	0.999125	96.7634
8.779	24.9739	24.996	23.8733	24.3771	25.6249	26.2133	7.12051e-05	0.006464	0.016617	49.3871	5.86352	5	1.65	0.413724	0.998864	80.6473
8.789	24.9858	25.006	23.8803	24.3861	25.635	26.2203	9.12534e-05	0.0072738	0.01824	49.6865	5.02218	4.76	1.71	0.405475	0.999299	68.5465
8.799	24.9969	25.016	23.8873	24.396	25.6459	26.2273	8.48893e-05	0.0078428	0.019801	49.4957	5.86072	6.05	2.3	0.399431	0.99942	80.8394
8.809	25.0088	25.026	23.8934	24.4051	25.656	26.2343	8.79704e-05	0.007985	0.019874	49.7159	5.67631	11.93	1.93	0.404084	0.999675	79.6336
8.819	25.0199	25.036	23.9003	24.4141	25.666	26.2422	0.000103611	0.0078726	0.018974	50.1508	4.60119	9.36	1.42	0.409409	0.999959	66.7912
8.829	25.0318	25.046	23.9073	24.4231	25.676	26.2493	8.97206e-05	0.007498	0.018234	50.5614	5.10631	6.68	2.03	0.399271	0.999924	73.6108
8.839	25.0429	25.056	23.9134	24.4321	25.686	26.2563	7.38642e-05	0.0070211	0.017429	50.989	5.92864	6.31	1.83	0.390417	0.999957	83.9622
8.849	25.0539	25.066	23.9203	24.4411	25.696	26.2633	7.18598e-05	0.0063875	0.01618	51.5703	5.6573	6.65	2.18	0.394221	0.999329	80.4873
8.859	25.0658	25.076	23.9273	24.4501	25.706	26.2712	6.81254e-05	0.0059503	0.015033	52.2895	5.54439	6.63	2.16	0.395673	0.999636	76.8582
8.869	25.0769	25.086	23.9343	24.4591	25.716	26.2774	6.19352e-05	0.005365	0.014166	52.092	5.74681	7.28	2.08	0.389252	0.999494	76.5526
8.879	25.0888	25.096	23.9404	24.4681	25.726	26.2852	5.5101e-05	0.005171	0.013592	51.5481	6.19785	5.02	2.55	0.4062	0.999706	83.3959
8.889	25.0999	25.106	23.9473	24.4771	25.736	26.2923	5.0489e-05	0.0052485	0.013776	49.3452	6.85557	4.41	1.44	0.413755	0.999427	90.7366
8.899	25.1118	25.116	23.9543	24.487	25.746	26.2984	4.84923e-05	0.0056399	0.015029	47.2962	7.78707	5.31	2.04	0.399943	0.999834	100.558
8.909	25.1229	25.126	23.9613	24.4961	25.756	26.3062	5.42479e-05	0.0065826	0.017159	45.6968	7.94742	7.59	1.68	0.38857	0.999575	103.728
8.919	25.1348	25.136	23.9683	24.506	25.7651	26.3133	7.40957e-05	0.0079079	0.0199	44.7295	6.74803	6.67	1.62	0.395904	0.999713	90.0295
8.929	25.1468	25.146	23.9753	24.5151	25.775	26.3203	8.64329e-05	0.0095548	0.023209	44.3859	6.74674	7.37	1.69	0.403437	0.999754	93.6934
8.939	25.1579	25.156	23.9832	24.525	25.785	26.3282	0.000104257	0.011162	0.026791	43.8581	6.45652	4.43	1.95	0.411336	0.999866	89.8238
8.949	25.1689	25.166	23.9903	24.5341	25.795	26.3344	0.000137553	0.012778	0.029021	43.5777	5.30102	5.83	1.85	0.421343	0.999817	76.9522
8.959	25.1808	25.176	23.9973	24.544	25.8041	26.3422	0.000152783	0.014093	0.030535	43.159	5.02156	5.84	1.97	0.443102	0.99988	77.5477
8.969	25.1919	25.186	24.0043	24.554	25.814	26.3484	0.000133351	0.01547	0.031148	42.8957	5.86882	4.15	1.51	0.4616	0.999911	96.5572
8.979	25.2038	25.196	24.0113	24.564	25.8231	26.3553	0.000117505	0.016289	0.030831	42.5928	6.59245	5.65	1.61	0.479136	0.999865	116.684
8.989	25.2149	25.206	24.0183	24.5731	25.8321	26.3623	0.00012323	0.01644	0.029757	42.1149	6.06723	6.59	1.37	0.500354	0.999695	112.854
8.999	25.2268	25.216	24.0262	24.583	25.842	26.3693	0.000135794	0.015952	0.028054	41.9265	5.19077	4.8	1.14	0.514858	0.999549	99.6659
9.009	25.2388	25.226	24.0324	24.593	25.8511	26.3763	0.000153224	0.014803	0.026203	42.1595	4.29676	5.36	1.13	0.507902	0.999514	82.1477
9.019	25.2499	25.2369	24.0402	24.603	25.861	26.3833	0.000145906	0.013722	0.02432	42.7486	4.188	5.35	0.98	0.506895	0.999757	81.1206
9.029	25.2618	25.247	24.0473	24.6139	25.8701	26.3903	0.00011882	0.012765	0.022327	43.5729	4.72126	4.99	1.31	0.4999	0.999711	92.3076
9.039	25.2729	25.257	24.0552	24.624	25.8791	26.3973	9.01741e-05	0.011776	0.020481	44.9536	5.70671	5.04	1.09	0.504077	0.999337	113.846
9.049	25.2848	25.267	24.0623	24.634	25.8881	26.4034	6.52865e-05	0.01031	0.018714	46.4803	7.20212	5.7	1.91	0.495587	0.999861	138.909
9.059	25.2959	25.277	24.0693	24.644	25.8971	26.4103	6.50371e-05	0.0084226	0.016093	47.5447	6.21717	4.59	2.14	0.473769	0.999621	114.688
9.069	25.3069	25.287	24.0763	24.654	25.9061	26.4164	7.43145e-05	0.0067374	0.013079	48.8803	4.42199	3.92	1.61	0.48923	0.99964	80.0557
9.079	25.3188	25.297	24.0833	24.664	25.9151	26.4224	6.15326e-05	0.0053357	0.01067	50.697	4.35688	3.82	3.12	0.490058	0.999188	79.1255
9.089	25.3299	25.307	24.0912	24.6749	25.925	26.4293	4.03546e-05	0.0045479	0.0084331	51.4182	5.25063	3.73	2.78	0.495109	0.998578	99.2849
9.099	25.3418	25.317	24.0992	24.685	25.9341	26.4363	2.99813e-05	0.0035814	0.0062683	50.8876	5.2531	3.68	5.03	0.576896	0.992974	105.656
9.109	25.3529	25.327	24.1072	24.6959	25.9431	26.4424	2.46852e-05	0.0024331	0.0043087	50.132	4.38557	3.66	7.65	0.544952	0.995754	91.2084
9.119	25.3648	25.337	24.1161	24.7069	25.9521	26.4493	2.46933e-05	0.0014388	0.002886	45.0466	2.93653	3.73	4.31	0.515109	0.990338	51.9979
9.129	25.3759	25.3479	24.1233	24.717	25.9611	26.4554	2.24851e-05	0.0007983	0.0021923	38.4872	2.44975	3.84	6.31	0.294495	0.997652	29.7713
9.139	25.3878	25.358	24.1312	24.727	25.9701	26.4623	2.35825e-05	0.00058784	0.0019792	36.5791	2.10871	3.81	3.24	0.291559	0.994319	20.3308
9.149	25.3989	25.368	24.1383	24.7379	25.9791	26.4693	2.22647e-05	0.00058723	0.0022403	38.1794	2.52817	3.91	2.01	0.265002	0.99532	21.2606
9.159	25.4108	25.378	24.1462	24.7498	25.9881	26.4754	2.35929e-05	0.00095059	0.0033258	41.3906	3.54186	4.18	2.73	0.298552	0.997311	32.7272
9.169	25.4219	25.388	24.1542	24.7609	25.9971	26.4814	2.22539e-05	0.0019245	0.0052035	46.4143	5.87499	4.29	3.39	0.400654	0.999354	69.3947
9.179	25.4329	25.3989	24.1631	24.7719	26.0061	26.4883	2.4913e-05	0.0032279	0.0075106	47.097	7.57471	4.48	3.78	0.503855	0.998493	115.462
9.189	25.4448	25.409	24.1712	24.7838	26.0142	26.4944	2.90959e-05	0.004257	0.0099275	48.526	8.57284	4.71	3.28	0.493482	0.999029	126.544
9.199	25.4559	25.419	24.1792	24.7949	26.0231	26.5013	4.69415e-05	0.0047788	0.011247	48.6907	6.02	4.31	3.49	0.479475	0.999393	85.99
9.209	25.4678	25.4299	24.1881	24.8059	26.0321	26.5074	7.51748e-05	0.0048501	0.01148	48.5007	3.83695	4.06	2.85	0.484506	0.999754	55.7541
9.219	25.4789	25.44	24.1971	24.8169	26.0411	26.5143	7.45027e-05	0.0048679	0.011424	48.707	3.85268	3.72	2.82	0.486497	0.99981	56.5094
9.229	25.4908	25.45	24.2052	24.8288	26.0501	26.5204	4.62895e-05	0.0046796	0.010886	48.7544	5.90885	3.96	2.81	0.488646	0.999934	87.3158
9.239	25.5019	25.4609	24.2132	24.8399	26.0591	26.5264	3.04025e-05	0.0041295	0.0088335	48.5178	7.30029	4.44	2.9	0.547127	0.999821	118.339
9.249	25.5138	25.471	24.2221	24.8518	26.0672	26.5333	2.35717e-05	0.0031406	0.0063941	47.048	6.81563	3.76	4.87	0.547966	0.997974	119.05
9.259	25.5249	25.4819	24.2311	24.8638	26.0761	26.5394	2.33729e-05	0.0019168	0.0043171	45.5696	4.64085	4.11	3.56	0.457931	0.997087	67.0051
9.269	25.5368	25.492	24.2392	24.8758	26.0851	26.5454	2.35987e-05	0.0011312	0.0027883	40.9482	2.96872	4.47	6.44	0.420061	0.99128	41.7244
9.279	25.5479	25.5029	24.2481	24.8878	26.0941	26.5523	2.29278e-05	0.00074565	0.0021328	37.2068	2.33724	4.43	8.26	0.305786	0.975897	26.48
9.289	25.5598	25.513	24.2562	24.8998	26.1022	26.5584	2.73548e-05	0.00076615	0.001977	32.9536	1.8159	4.23	4.74	0.351275	0.981461	22.6377
9.299	25.5709	25.5239	24.2651	24.9118	26.1111	26.5653	3.17442e-05	0.00082373	0.002057	32.3123	1.62812	4.47	5.76	0.34614	0.993542	20.2346
9.309	25.5828	25.534	24.2732	24.9238	26.1201	26.5714	3.32791e-05	0.0010112	0.0023084	31.623	1.74283	4.37	5.45	0.337713	0.999531	22.5168
9.319	25.5939	25.5449	24.2821	24.9358	26.1291	26.5783	2.82264e-05	0.0013137	0.0027047	31.1053	2.40758	4.33	4.54	0.334653	0.983186	33.1158
9.329	25.6058	25.555	24.2911	24.9487	26.1372	26.5844	3.0639e-05	0.001596	0.0031946	30.151	2.61974	4.46	3.92	0.349935	0.968446	36.3915
9.339	25.6169	25.5659	24.3001	24.9608	26.1461	26.5904	3.99037e-05	0.001753	0.0034187	30.9603	2.15261	4.11	3.7	0.348938	0.968	30.2153
9.349	25.6279	25.5769	24.3109	24.9737	26.1551	26.5973	5.7084e-05	0.0018527	0.0036136	32.0257	1.59053	4.42	3.35	0.36087	0.962894	21.9221
9.359	25.6398	25.587	24.3201	24.9858	26.1641	26.6034	5.24581e-05	0.001953	0.0038727	31.5878	1.85489	4.83	2.97	0.385973	0.97184	25.1058
9.369	25.6509	25.5979	24.3291	24.9987	26.1722	26.6094	3.9241e-05	0.0019867	0.003922	32.6008	2.51122	4.76	2.64	0.400406	0.97595	34.3467
9.379	25.6628	25.6089	24.339	25.0117	26.1811	26.6154	3.41889e-05	0.0019134	0.0037908	33.4339	2.78588	4.51	2.07	0.430096	0.987274	38.2025
9.389	25.6739	25.619	24.349	25.0247	26.1901	26.6223	3.3977e-05	0.0017158	0.0034384	34.0188	2.54266	3.92	1.68	0.467513	0.995428	35.2297
9.399	25.6858	25.6299	24.3599	25.0377	26.1991	26.6284	3.28715e-05	0.001418	0.0029742	35.2311	2.27336	3.33	2.42	0.454145	0.998576	30.6861
9.409	25.6969	25.6409	24.3709	25.0507	26.2072	26.6344	3.46233e-05	0.001114	0.002756	34.7337	1.99999	3.91	2.85	0.397491	0.999162	23.3129
9.419	25.7079	25.6519	24.381	25.0637	26.2161	26.6404	3.81435e-05	0.00086301	0.0024896	34.6819	1.63993	4.83	2.53	0.348777	0.998754	16.246
9.429	25.7198	25.6629	24.391	25.0767	26.2251	26.6473	4.69495e-05	0.00066624	0.0022132	35.285	1.18442	7.42	2.18	0.314507	0.999426	10.5111
9.439	25.7309	25.6739	24.401	25.0906	26.2332	26.6534	5.13796e-05	0.00059626	0.0022584	35.369	1.1044	6.67	2.31	0.265857	0.998259	8.95238
9.449	25.7428	25.6849	24.4119	25.1037	26.2421	26.6594	5.13553e-05	0.00077136	0.0026768	38.4778	1.30963	7.65	2.55	0.285439	0.995813	12.5709
9.459	25.7539	25.695	24.422	25.1176	26.2511	26.6654	4.67214e-05	0.0013145	0.0039629	41.0031	2.13115	6.63	3.27	0.322204	0.989829	24.2501
9.469	25.7658	25.7059	24.4347	25.1316	26.2592	26.6723	4.08026e-05	0.0026031	0.0060323	47.392	3.7146	5.85	3.61	0.436319	0.995391	53.5579
9.479	25.7769	25.7169	24.4459	25.1456	26.2681	26.6784	4.27611e-05	0.0041028	0.009096	51.2396	5.34464	5.29	4.23	0.471399	0.998653	86.8523
9.489	25.7888	25.7279	24.4578	25.1587	26.2771	26.6853	5.31261e-05	0.0059793	0.012741	53.7423	6.02577	4.69	3.35	0.481026	0.999073	100.96
9.499	25.7999	25.7389	24.4689	25.1726	26.2852	26.6914	6.96436e-05	0.0076021	0.016568	54.6612	5.97731	4.33	4.66	0.481905	0.999701	99.8341
9.509	25.8118	25.7499	24.4799	25.1866	26.2941	26.6974	9.12696e-05	0.0091988	0.020209	56.007	5.56334	4.59	2.34	0.493015	0.999333	90.6084
9.519	25.8229	25.7618	24.4918	25.1997	26.3031	26.7043	0.000111102	0.0098073	0.026094	60.5892	5.90113	4.82	3.82	0.414166	0.996872	81.3089
9.519	25.8229	25.7618	24.4918	25.1997	26.3031	26.7043	0.000111103	0.010856	0.023185	56.4839	5.2432	4.82	4.31	0.507989	0.999653	88.9954
9.529	25.8339	25.7729	24.5029	25.2136	26.3112	26.7104	0.00012387	0.010239	0.02731	60.5422	5.53952	4.08	3.47	0.411371	0.997819	74.5677
9.539	25.8458	25.7839	24.5148	25.2285	26.3201	26.7164	0.00010932	0.010202	0.027481	60.5511	6.31613	3.29	3.7	0.40662	0.99786	84.9042
9.549	25.8569	25.7949	24.5277	25.2426	26.3291	26.7224	8.66237e-05	0.0099817	0.026527	60.5989	7.69428	3.7	3.67	0.415821	0.997922	104.836
9.559	25.8688	25.8059	24.5407	25.2566	26.3372	26.7293	6.90118e-05	0.0093824	0.024202	60.3108	8.81139	3.8	3.79	0.428764	0.9983	123.621
9.569	25.8799	25.8169	24.5528	25.2706	26.3461	26.7354	6.06106e-05	0.0080436	0.020964	60.6146	8.69046	5.45	4.45	0.434396	0.995925	122.322
9.579	25.8918	25.8288	24.5657	25.2855	26.3551	26.7423	6.23816e-05	0.0068584	0.017801	60.3355	7.16976	4.17	7.56	0.450639	0.997477	99.9765
9.589	25.9029	25.8399	24.5787	25.2996	26.3632	26.7484	6.34603e-05	0.005676	0.015041	60.9018	5.95513	3.93	8.67	0.464893	0.994097	83.9281
9.599	25.9148	25.8509	24.5935	25.3145	26.3721	26.7544	5.5081e-05	0.0053705	0.013536	61.19	6.17455	3.68	7.5	0.473188	0.992511	87.7762
9.609	25.9259	25.8619	24.6076	25.3295	26.3811	26.7613	4.7378e-05	0.0051714	0.012702	61.4166	6.73617	3.53	8.04	0.49426	0.994818	100.114
9.619	25.9378	25.8738	24.6207	25.3436	26.3892	26.7674	4.80376e-05	0.0048748	0.012091	61.1059	6.32408	3.56	7.22	0.503508	0.995493	95.6562
9.629	25.9489	25.8849	24.6337	25.3585	26.3981	26.7734	5.44397e-05	0.0047204	0.011318	61.2038	5.22361	3.63	9.42	0.516566	0.996157	79.9251
9.639	25.9608	25.8959	24.6467	25.3735	26.4071	26.7803	5.53172e-05	0.0044073	0.010738	61.4627	4.8773	4.16	8.51	0.501951	0.9917	71.6088
9.649	25.9719	25.9078	24.6606	25.3876	26.4152	26.7864	5.55398e-05	0.0043038	0.010527	60.7767	4.76231	4.25	8.96	0.494121	0.992872	69.6456
9.659	25.9838	25.9189	24.6746	25.4025	26.4241	26.7933	5.04631e-05	0.0041986	0.010446	60.9973	5.20108	4.04	9.12	0.500633	0.99369	76.2122
9.669	25.9949	25.9308	24.6886	25.4175	26.4331	26.7994	4.93819e-05	0.0041946	0.010274	61.0673	5.22744	3.81	9.06	0.505511	0.995624	77.7735
9.679	26.0068	25.9419	24.7017	25.4325	26.4412	26.8063	6.32457e-05	0.0040747	0.010151	60.5453	4.03269	3.67	9.18	0.51088	0.995841	58.8735
9.689	26.0179	25.9529	24.7165	25.4466	26.4501	26.8124	7.00878e-05	0.003849	0.0099081	60.0475	3.55194	3.98	10.92	0.483966	0.998249	50.0601
9.699	26.0289	25.9648	24.7324	25.4615	26.4591	26.8193	7.60659e-05	0.0036551	0.0096582	59.8042	3.19024	4.13	10.18	0.46437	0.988188	42.759
9.709	26.0408	25.9759	24.7475	25.4765	26.4672	26.8254	7.53787e-05	0.0035838	0.0095779	58.9581	3.19256	7.05	10.04	0.465558	0.994864	43.0705
9.719	26.0519	25.9878	24.7625	25.4915	26.4761	26.8314	6.83276e-05	0.0036382	0.0094355	58.4294	3.46965	4.89	9.94	0.477004	0.996315	48.1387
9.729	26.0638	25.9998	24.7775	25.5065	26.4851	26.8383	5.90791e-05	0.0037328	0.0093613	57.8501	3.98125	3.1	9.87	0.47771	0.996156	57.005
9.739	26.0749	26.0109	24.7934	25.5215	26.4932	26.8444	5.46461e-05	0.0037173	0.0093381	57.0006	4.29355	4.43	9.53	0.461485	0.996346	61.3511
9.749	26.0868	26.0228	24.8094	25.5365	26.5021	26.8504	5.9288e-05	0.0035607	0.0092097	56.2987	3.90297	4.84	9.79	0.448359	0.995056	54.1053
9.759	26.0979	26.0339	24.8236	25.5515	26.5102	26.8573	6.47911e-05	0.0033832	0.0089248	56.6378	3.46099	4.19	10.15	0.437812	0.995006	46.8768
9.769	26.1098	26.0458	24.8394	25.5674	26.5191	26.8634	6.10348e-05	0.0033885	0.0088853	56.6331	3.65773	6.58	10.08	0.439449	0.995407	48.9671
9.779	26.1209	26.0569	24.8545	25.5816	26.5281	26.8703	5.24517e-05	0.0034034	0.0089588	56.7763	4.29148	4.57	9.81	0.437252	0.995532	58.3889
9.789	26.1319	26.0688	24.8713	25.5974	26.5362	26.8764	4.14371e-05	0.0034878	0.0090427	57.1732	5.4831	4.97	9.6	0.444974	0.995879	75.7317
9.799	26.1438	26.0808	24.8883	25.6125	26.5451	26.8824	4.64899e-05	0.0035376	0.0090635	57.5132	4.8984	4.18	9.43	0.451721	0.995982	68.4644
9.809	26.1549	26.0919	24.9035	25.6275	26.5541	26.8884	4.89392e-05	0.0035781	0.0091213	57.6886	4.68292	4.27	9.15	0.450829	0.99619	65.8225
9.819	26.1668	26.1038	24.9203	25.6425	26.5622	26.8953	5.04582e-05	0.0037669	0.00958	56.9599	4.77036	4.9	8.67	0.421435	0.99575	67.3806
9.829	26.1779	26.1158	24.9382	25.6575	26.5711	26.9014	4.93795e-05	0.0043274	0.010707	55.7414	5.44802	5.45	7.43	0.395854	0.994901	77.0948
9.839	26.1898	26.1269	24.9562	25.6725	26.5801	26.9074	5.02571e-05	0.0048027	0.011897	55.3138	5.94781	6.53	7.57	0.412959	0.997496	88.5666
9.849	26.2009	26.1388	24.9733	25.6884	26.5882	26.9134	5.00425e-05	0.0053581	0.012998	54.7078	6.52612	6.36	5.2	0.414183	0.99694	96.2942
9.859	26.2128	26.1508	24.9912	25.7035	26.5971	26.9194	5.40216e-05	0.0054471	0.013818	53.8851	6.4268	4.2	5.58	0.382863	0.998024	91.8152
9.869	26.2239	26.1628	25.0092	25.7185	26.6061	26.9263	6.30501e-05	0.0055031	0.014265	52.9891	5.68464	4.6	5.65	0.365548	0.997445	79.3322
9.879	26.2349	26.1739	25.0281	25.7344	26.6142	26.9324	5.84002e-05	0.0056682	0.014546	51.5259	6.25816	4.36	5.42	0.356694	0.998093	87.51
9.889	26.2468	26.1858	25.0453	25.7495	26.6231	26.9384	4.73885e-05	0.0061071	0.015545	49.1227	8.24204	4.21	5.37	0.36135	0.997797	114.929
9.899	26.2579	26.1978	25.0632	25.7645	26.6321	26.9444	4.07825e-05	0.0064465	0.016658	47.0296	10.2628	4.3	4.51	0.374842	0.998415	139.278
9.909	26.2698	26.2098	25.0821	25.7804	26.6402	26.9504	4.60823e-05	0.0067026	0.017352	45.2355	9.4609	4.58	4.26	0.373354	0.999519	124.286
9.919	26.2809	26.2209	25.1002	25.7955	26.6491	26.9573	6.10429e-05	0.0063966	0.017685	43.8134	7.27926	4.78	4.38	0.356583	0.99956	89.9794
9.929	26.2928	26.2328	25.1191	25.8105	26.6581	26.9634	6.50193e-05	0.006068	0.017627	42.8642	6.81166	4.43	4.35	0.337611	0.999168	79.301
9.939	26.3039	26.2448	25.139	25.8255	26.6671	26.9694	6.98813e-05	0.0059867	0.017566	42.3257	6.31581	3.02	4.06	0.336273	0.998735	72.2282
9.949	26.3158	26.2568	25.1581	25.8405	26.6752	26.9763	5.92721e-05	0.0062244	0.017895	42.0206	7.58574	4.31	3.84	0.349265	0.999548	88.5425
9.959	26.3269	26.2688	25.1771	25.8555	26.6841	26.9824	4.43114e-05	0.0065563	0.018072	42.8138	10.2473	4.85	3.74	0.372907	0.999492	125.27
9.969	26.3388	26.2808	25.197	25.8714	26.6931	26.9884	4.47592e-05	0.0068977	0.018406	44.1736	10.3322	4.73	3.55	0.400344	0.999757	132.029
9.979	26.3499	26.2919	25.2161	25.8865	26.7012	26.9953	5.50865e-05	0.0075068	0.019354	46.1035	8.82759	3.68	4	0.428319	0.999596	119.661
9.989	26.3618	26.3038	25.2351	25.9015	26.7101	27.0014	6.32593e-05	0.0087957	0.02191	47.4482	8.70231	5.2	3	0.436923	0.999331	119.955
9.999	26.3729	26.3158	25.2559	25.9165	26.7191	27.0083	7.27226e-05	0.010385	0.025605	47.8938	8.84651	5.27	3.68	0.452622	0.999848	124.186
10.009	26.3848	26.3278	25.2742	25.9324	26.7281	27.0144	8.48473e-05	0.012109	0.029332	48.3561	8.68601	5	3.35	0.461625	0.999669	123.41
10.019	26.3959	26.3398	25.2949	25.9475	26.7362	27.0204	0.000100936	0.013397	0.032658	48.9656	8.12941	7.76	4.63	0.469616	0.999858	117.292
10.029	26.4078	26.3518	25.3141	25.9625	26.7451	27.0273	0.000112844	0.01448	0.035073	49.8035	7.80932	7.71	3.28	0.468632	0.999797	112.395
10.039	26.4189	26.3638	25.3349	25.9775	26.7532	27.0334	0.000109344	0.014947	0.036462	50.6356	8.37842	7.57	3.68	0.469884	0.99965	121.241
10.049	26.4308	26.3749	25.3541	25.9934	26.7621	27.0403	9.94178e-05	0.01498	0.037081	51.1778	9.3714	5	3.72	0.462248	0.999768	133.427
10.059	26.4419	26.3868	25.3749	26.0085	26.7711	27.0464	9.30039e-05	0.014284	0.036508	51.4668	9.86288	5.82	3.65	0.451412	0.999823	136.328
10.069	26.4529	26.3988	25.395	26.0235	26.7792	27.0524	0.000100517	0.013095	0.034463	51.9369	8.61453	5.25	3.3	0.440954	0.999814	115.652
10.079	26.4648	26.4108	25.415	26.0385	26.7881	27.0593	9.60955e-05	0.012325	0.032824	52.2305	8.58233	5.32	3.75	0.428654	0.999703	113.013
10.089	26.4759	26.4228	25.4359	26.0544	26.7971	27.0654	7.18425e-05	0.012421	0.032973	52.3338	11.5317	5.71	3.24	0.42475	0.99972	152.403
10.099	26.4878	26.4348	25.456	26.0695	26.8052	27.0723	5.8631e-05	0.012988	0.034466	52.2374	14.77	5.1	2.96	0.417848	0.999598	195.698
10.109	26.4989	26.4468	25.4769	26.0845	26.8141	27.0793	7.38416e-05	0.013525	0.036402	52.2664	12.3863	5.57	2.81	0.407056	0.999598	160.424
10.119	26.5108	26.4588	25.4979	26.0995	26.8231	27.0854	0.000108231	0.013684	0.038135	52.3572	8.85301	4.69	2.5	0.398241	0.99949	111.586
10.129	26.5219	26.4708	25.518	26.1145	26.8312	27.0914	0.000138655	0.014539	0.03969	52.5179	7.19219	4.45	2.48	0.407271	0.999784	92.7696
10.139	26.5338	26.4828	25.5389	26.1304	26.8401	27.0983	0.000131367	0.015971	0.042116	52.874	8.05524	4.72	3.33	0.417646	0.99928	107.295
10.149	26.5449	26.4948	25.559	26.1455	26.8491	27.1044	9.80946e-05	0.016523	0.044415	53.4144	11.3763	3.67	2.48	0.419623	0.999703	151.13
10.159	26.5568	26.5068	25.5799	26.1605	26.8572	27.1104	0.000101399	0.016109	0.043631	53.5476	10.8113	5.32	2.41	0.412749	0.999486	142.259
10.169	26.5679	26.5188	25.6009	26.1755	26.8661	27.1173	0.000131351	0.014636	0.039142	53.2542	7.48735	5.39	2.34	0.423023	0.999503	99.7103
10.179	26.5798	26.5308	25.621	26.1905	26.8751	27.1234	0.000115728	0.012996	0.035333	52.4184	7.67113	5.67	2.78	0.408152	0.99951	100.226
10.189	26.5909	26.5428	25.641	26.2055	26.8841	27.1294	7.14052e-05	0.012001	0.03339	51.7129	11.7491	5.75	3.33	0.403927	0.99971	148.715
10.199	26.6028	26.5539	25.6619	26.2214	26.8922	27.1363	6.23817e-05	0.011367	0.030847	50.8639	12.4243	5.62	2.73	0.405872	0.999776	160.672
10.209	26.6139	26.5658	25.6829	26.2365	26.9011	27.1424	7.5827e-05	0.010333	0.027685	49.8478	9.17355	5.76	3.72	0.412984	0.99961	119.277
10.219	26.6258	26.5778	25.7039	26.2515	26.9092	27.1493	9.01412e-05	0.008732	0.025363	48.6478	7.06959	5.69	2.64	0.379734	0.998966	84.8336
10.229	26.6369	26.5898	25.7249	26.2665	26.9181	27.1554	9.05812e-05	0.0078426	0.024213	47.6864	6.71626	6.22	3.59	0.355579	0.999425	74.489
10.239	26.6488	26.6018	25.7459	26.2815	26.9271	27.1623	7.1864e-05	0.0082781	0.025441	47.6597	8.89487	5.68	3.02	0.359353	0.999582	99.2082
10.249	26.6599	26.6138	25.7669	26.2965	26.9361	27.1684	5.35682e-05	0.011044	0.030348	49.1027	14.2344	5.66	2.89	0.407144	0.999664	174.93
10.259	26.6718	26.6258	25.7879	26.3124	26.9442	27.1753	4.9581e-05	0.015401	0.038005	50.7904	19.2594	6.99	2.79	0.456015	0.99978	271.395
10.269	26.6829	26.6378	25.808	26.3275	26.9531	27.1814	6.61383e-05	0.019959	0.048351	51.8215	18.3683	5.61	1.65	0.473611	0.999686	264.159
10.279	26.6948	26.6498	25.8289	26.3425	26.9621	27.1883	0.000126076	0.023024	0.05967	52.3639	11.8916	5.52	1.65	0.447002	0.999808	160.959
10.289	26.7059	26.6618	25.8499	26.3584	26.9711	27.1944	0.000224191	0.025511	0.067676	52.4412	7.5846	7	1.48	0.436337	0.999813	100.343
10.299	26.7169	26.6738	25.8709	26.3735	26.9792	27.2013	0.000276641	0.028325	0.073955	52.2713	6.71688	6.38	1.68	0.441593	0.999959	89.6757
10.309	26.7288	26.6858	25.8919	26.3885	26.9881	27.2074	0.000215364	0.031445	0.081352	52.3262	9.49101	5.5	1.7	0.449461	0.999817	128.68
10.319	26.7399	26.6978	25.9129	26.4035	26.9971	27.2143	0.000147234	0.033787	0.087075	52.3456	14.8595	4.58	1.27	0.449717	0.999805	202.263
10.329	26.7518	26.7098	25.9339	26.4185	27.0061	27.2204	0.000141082	0.034943	0.086692	52.1638	15.4391	4.32	1.46	0.468374	0.999903	219.085
10.339	26.7629	26.7218	25.9549	26.4344	27.0142	27.2273	0.000177456	0.034043	0.084611	52.0059	11.9799	5.895	1.46	0.469831	0.999911	170.126
10.349	26.7748	26.7338	25.975	26.4495	27.0231	27.2334	0.00017369	0.03177	0.082496	51.8336	11.9337	4.22	1.46	0.447495	0.999863	161.696
10.359	26.7859	26.7458	25.9959	26.4645	27.0321	27.2403	0.000188911	0.030607	0.080792	51.5874	10.7455	5	1.69	0.443107	0.999776	143.475
10.369	26.7978	26.7578	26.0169	26.4795	27.0402	27.2473	0.000216928	0.030695	0.079092	51.3109	9.16081	4.84	1.48	0.451824	0.999908	124.783
10.379	26.8089	26.7698	26.0379	26.4945	27.0491	27.2534	0.000165093	0.030714	0.077414	51.0241	11.7817	5.13	1.37	0.460988	0.999906	163.883
10.389	26.8208	26.7818	26.0589	26.5095	27.0581	27.2603	0.000132695	0.029892	0.07465	50.6922	14.1349	2.94	1.2	0.459045	0.999813	198.176
10.399	26.8319	26.7938	26.079	26.5254	27.0671	27.2673	0.00014724	0.028486	0.071895	50.3306	12.2685	4.26	1.62	0.451099	0.999815	170.225
10.409	26.8438	26.8058	26.0999	26.5405	27.0761	27.2734	0.000161372	0.026427	0.068056	49.465	10.5963	3.53	1.25	0.440881	0.999781	144.139
10.419	26.8549	26.8178	26.12	26.5555	27.0842	27.2803	0.000147237	0.02515	0.067864	49.0996	11.5808	3.03	1.2	0.412464	0.999719	149.378
10.429	26.8668	26.8298	26.14	26.5705	27.0931	27.2864	0.000138875	0.025824	0.070646	49.5089	12.7814	2.86	1.42	0.407992	0.999776	163.009
10.439	26.8779	26.8418	26.1609	26.5864	27.1021	27.2933	0.000139081	0.02835	0.07635	50.6689	13.793	2.59	1.77	0.41684	0.9997	179.831
10.449	26.8889	26.8538	26.1819	26.6015	27.1102	27.3003	0.000153198	0.030276	0.084813	51.9976	13.91	2.14	1.98	0.40701	0.999712	175.485
10.459	26.9008	26.8658	26.2029	26.6165	27.1191	27.3064	0.000251081	0.030412	0.091785	52.9377	9.18491	3.03	2.23	0.379726	0.999826	109.248
10.469	26.9119	26.8778	26.2239	26.6315	27.1281	27.3133	0.000407149	0.029479	0.091903	53.4603	5.67144	2.96	2.73	0.36965	0.999773	65.2881
10.479	26.9238	26.8898	26.2449	26.6474	27.1371	27.3203	0.000447916	0.027494	0.088497	53.8195	4.9642	3.64	2.51	0.356624	0.999842	55.5528
10.489	26.9349	26.9018	26.265	26.6625	27.1461	27.3264	0.000318512	0.025486	0.084609	53.8909	6.67433	2.44	2.98	0.347803	0.999808	72.7602
10.499	26.9468	26.9138	26.2859	26.6775	27.1542	27.3333	0.000180298	0.023205	0.075553	54.0597	10.5288	4.53	2.63	0.348445	0.999751	116.746
10.509	26.9579	26.9258	26.306	26.6925	27.1631	27.3403	0.000115267	0.019857	0.061508	53.7653	13.4074	5.55	2.18	0.361079	0.999625	155.873
10.519	26.9698	26.9378	26.3269	26.7084	27.1721	27.3464	9.76464e-05	0.015325	0.047405	52.4352	12.1979	5.84	1.81	0.350967	0.999083	139.647
10.529	26.9809	26.9498	26.3479	26.7235	27.1811	27.3533	0.000115273	0.010676	0.035564	49.3009	7.75176	5.26	2.69	0.312362	0.998362	82.172
10.539	26.9928	26.9618	26.368	26.7385	27.1901	27.3603	0.000136219	0.0076484	0.027088	44.936	4.99638	9.11	3.04	0.272238	0.99627	48.3074
10.549	27.0039	26.9738	26.3889	26.7535	27.1991	27.3664	0.000141755	0.0061569	0.02236	41.4095	3.96325	10.43	2.69	0.255689	0.997588	37.718
10.559	27.0149	26.9858	26.4099	26.7685	27.2081	27.3733	0.000133581	0.0054536	0.019847	39.0373	3.73309	10.31	3.28	0.24604	0.995213	34.3321
10.569	27.0268	26.9978	26.4309	26.7835	27.2162	27.3803	0.000134463	0.0049731	0.017929	37.494	3.35019	10.48	3.5	0.236302	0.995105	30.2365
10.579	27.0379	27.0098	26.4519	26.7994	27.2251	27.3873	0.000145712	0.0041787	0.015927	36.1929	2.74634	11.56	6.47	0.232333	0.996916	24.0851
10.589	27.0498	27.0218	26.4729	26.8145	27.2341	27.3943	0.000131147	0.003331	0.013947	35.4728	2.67202	9.77	5.43	0.197422	0.995127	20.3932
10.599	27.0609	27.0338	26.493	26.8295	27.2431	27.4013	0.000108009	0.0025573	0.012562	34.1001	2.92224	12.63	4.85	0.178625	0.989651	18.704
10.609	27.0728	27.0458	26.5139	26.8445	27.2521	27.4083	9.54226e-05	0.0020985	0.011697	34.1661	3.07992	8.89	4.99	0.15416	0.98384	16.4259
10.619	27.0839	27.0578	26.534	26.8595	27.2602	27.4144	0.00010118	0.0019804	0.011325	33.6346	2.81228	9.75	5.35	0.145335	0.998158	14.658
10.629	27.0949	27.0698	26.5549	26.8745	27.2691	27.4213	0.000108661	0.0019393	0.011336	33.7067	2.62123	5.89	4.17	0.140033	0.998379	13.3369
10.639	27.1068	27.0818	26.5759	26.8895	27.2781	27.4283	9.61005e-05	0.0020366	0.011413	33.8584	2.98395	9.56	3.94	0.144592	0.998245	16.053
10.649	27.1179	27.0938	26.596	26.9045	27.2871	27.4353	8.37532e-05	0.0022426	0.011634	34.1608	3.49016	11.11	3.74	0.154765	0.997776	20.6332
10.659	27.1298	27.1058	26.6169	26.9204	27.2961	27.4423	7.64955e-05	0.0025016	0.01199	34.4741	3.93822	6.46	3.28	0.166196	0.997639	25.3335
10.669	27.1409	27.1178	26.6379	26.9355	27.3051	27.4493	7.89208e-05	0.0026848	0.012346	34.499	3.93054	8.18	3.17	0.175847	0.997485	26.6368
10.679	27.1528	27.1298	26.658	26.9505	27.3141	27.4563	7.49581e-05	0.0027748	0.012227	34.7328	4.09844	7.15	3.12	0.185923	0.997786	29.0549
10.689	27.1639	27.1418	26.6789	26.9655	27.3231	27.4633	6.7464e-05	0.0027522	0.011825	34.7792	4.40398	8.99	3.19	0.192112	0.997694	32.0912
10.699	27.1758	27.1538	26.699	26.9805	27.3321	27.4694	6.04043e-05	0.0025952	0.0109	35.5106	4.53393	7.46	3.25	0.198232	0.997898	34.0505
10.714	27.1924	27.1718	26.7304	27.003	27.3456	27.4808	6.56996e-05	0.0035836	0.013104	40.4438	5.01139	9.15	3.9	0.222165	0.974086	46.8983
10.724	27.2038	27.1838	26.751	27.018	27.3546	27.4878	6.81147e-05	0.0041033	0.014807	42.3133	5.46189	5.32	1.67	0.262236	0.99618	55.4946
10.734	27.2154	27.1958	26.771	27.0326	27.3636	27.4948	7.73797e-05	0.0046708	0.016612	43.6157	5.39401	3.83	2.66	0.262526	0.985416	53.9819
10.744	27.2268	27.2078	26.791	27.047	27.3726	27.5018	7.33923e-05	0.0052274	0.018714	44.9676	6.40668	3.84	1.48	0.273385	0.993057	66.3721
10.754	27.2384	27.2198	26.8114	27.062	27.3816	27.5088	7.23215e-05	0.0058268	0.021507	45.9305	7.47187	4.68	2.32	0.277749	0.995193	74.2283
10.764	27.2494	27.2318	26.832	27.077	27.3906	27.5162	8.15673e-05	0.0062886	0.024302	46.2238	7.48588	5.15	2.24	0.275292	0.993106	73.4154
10.774	27.2608	27.2438	26.8524	27.092	27.3996	27.5238	9.54587e-05	0.0065984	0.026203	46.4103	6.89687	5.01	2.1	0.277031	0.997337	67.6533
10.784	27.2724	27.2558	26.873	27.107	27.409	27.5308	9.6122e-05	0.0065237	0.027406	46.3442	7.16374	5.41	1.32	0.272722	0.996173	68.4297
10.794	27.2838	27.2678	26.893	27.122	27.4186	27.5378	9.34695e-05	0.0063812	0.028309	46.1576	7.60977	4.93	1.17	0.26493	0.997347	69.9768
10.804	27.2954	27.2798	26.9134	27.1366	27.4276	27.5452	8.57561e-05	0.0062323	0.028213	46.0388	8.26611	5.45	1.23	0.260636	0.996895	75.2693
10.814	27.3064	27.2918	26.934	27.151	27.4366	27.5528	8.11442e-05	0.0059903	0.027124	45.9657	8.39873	5.85	1.22	0.267125	0.996821	77.8528
10.824	27.3178	27.3038	26.954	27.166	27.4456	27.5602	7.38761e-05	0.0055801	0.025431	45.6191	8.64921	6.61	1.13	0.273619	0.997095	81.2523
10.834	27.3294	27.3158	26.9744	27.181	27.4546	27.5682	7.82456e-05	0.0050505	0.023627	45.0487	7.58692	5.195	0.96	0.272218	0.996163	70.7184
10.844	27.3404	27.3278	26.995	27.1956	27.464	27.5758	7.53806e-05	0.0047631	0.021718	44.5676	7.23897	5.73	0.87	0.275075	0.995011	67.9445
10.854	27.3518	27.3398	27.015	27.21	27.4736	27.5832	7.362e-05	0.0045288	0.020316	43.9974	6.93361	4.85	2.16	0.267048	0.993792	64.6632
10.864	27.3634	27.3518	27.0354	27.225	27.4826	27.5912	7.18523e-05	0.0042614	0.019222	43.7181	6.72163	4.81	1.67	0.272601	0.994364	62.6716
10.874	27.3748	27.3638	27.056	27.2396	27.4916	27.5992	6.85437e-05	0.0040589	0.018128	43.5958	6.64506	4.14	2.27	0.271388	0.994278	62.6841
10.884	27.3864	27.3758	27.076	27.254	27.501	27.6072	6.50399e-05	0.0036916	0.016937	42.5612	6.54295	4.25	1.76	0.272834	0.997043	61.799
10.894	27.3974	27.3878	27.096	27.269	27.5106	27.6152	6.28368e-05	0.0032789	0.015837	42.4137	6.33251	7.15	2.5	0.25703	0.989203	57.1735
10.904	27.4088	27.3998	27.116	27.2836	27.52	27.6232	5.5544e-05	0.0030735	0.014929	41.6906	6.75321	6.75	1.66	0.252747	0.99247	58.3555
10.914	27.4204	27.4118	27.1356	27.298	27.5296	27.6316	5.07093e-05	0.0028472	0.014023	40.8818	6.94817	4.4	2.54	0.248977	0.995069	60.3223
10.924	27.4318	27.4238	27.155	27.3126	27.539	27.6402	4.89246e-05	0.0026179	0.01332	39.7601	6.84059	5.73	3.01	0.242799	0.992883	57.4823
10.934	27.4434	27.4358	27.175	27.3266	27.5486	27.6482	4.8941e-05	0.0024497	0.013016	38.8204	6.68223	6.97	1.21	0.236262	0.992415	54.0181
10.944	27.4544	27.4478	27.195	27.341	27.5576	27.6566	5.59894e-05	0.0025021	0.01311	38.1699	5.88321	5.96	1.05	0.229173	0.996224	45.8587
10.954	27.4658	27.4598	27.2146	27.3556	27.567	27.6652	6.10664e-05	0.0026863	0.013704	38.0899	5.63848	6.08	0.8	0.222643	0.995907	43.5379
10.964	27.4774	27.4718	27.234	27.3696	27.5766	27.6736	6.10825e-05	0.0030475	0.015007	37.8517	6.17297	5.67	0.8	0.217996	0.9954	48.1546
10.974	27.4888	27.4838	27.2536	27.3836	27.586	27.6826	6.26089e-05	0.0036047	0.016808	38.2458	6.74523	5.69	0.85	0.227205	0.996752	54.9267
10.984	27.5004	27.4958	27.2726	27.3976	27.596	27.6916	7.31722e-05	0.0043051	0.019206	38.3149	6.59489	6.44	1.56	0.238633	0.996607	55.0988
10.994	27.5118	27.5078	27.292	27.4116	27.606	27.7006	8.22261e-05	0.0049895	0.021605	37.9086	6.60178	5.86	2.75	0.258571	0.995311	58.873
11.004	27.5234	27.5198	27.3116	27.4256	27.6156	27.7088	9.61151e-05	0.0055545	0.023505	37.9503	6.14449	5.97	2.07	0.268381	0.997827	55.4877
11.014	27.5348	27.5318	27.3306	27.4396	27.625	27.7162	0.000100522	0.0056822	0.024907	37.7552	6.22557	6.92	1.56	0.271468	0.998114	57.1589
11.024	27.5464	27.5438	27.3492	27.4536	27.635	27.7242	9.39015e-05	0.0056924	0.02571	37.43	6.87934	6.85	1.19	0.273623	0.997507	61.8116
11.034	27.5578	27.5558	27.3672	27.4676	27.645	27.7322	8.17855e-05	0.0054852	0.025321	37.0758	7.77896	6.5	0.43	0.275555	0.997505	69.571
11.044	27.5694	27.5678	27.3852	27.4816	27.655	27.7402	6.52463e-05	0.005099	0.023629	36.6921	9.09926	5.97	0.39	0.285535	0.997494	82.1441
11.054	27.5808	27.5798	27.4032	27.4952	27.6654	27.7482	5.55472e-05	0.0045295	0.021235	36.0229	9.60522	7.88	0.38	0.289616	0.997459	87.0323
11.064	27.5924	27.5918	27.4208	27.5082	27.676	27.7566	4.60647e-05	0.0037195	0.018536	35.7124	10.1103	10.17	1.54	0.285029	0.996673	88.8642
11.074	27.6038	27.6034	27.4378	27.5216	27.686	27.7652	4.93919e-05	0.0030465	0.015735	35.0679	8.00438	8.13	3.32	0.265889	0.993444	67.1831
11.084	27.6154	27.6148	27.4548	27.5352	27.6964	27.774	4.27754e-05	0.0024239	0.013631	34.1822	8.00665	7	3.06	0.252798	0.998773	63.7119
11.094	27.6268	27.6268	27.4714	27.5482	27.707	27.7836	4.69446e-05	0.0020449	0.011924	34.1668	6.38195	4.98	1.66	0.223141	0.988996	45.5175
11.104	27.6388	27.6388	27.487	27.5612	27.7174	27.7926	4.34435e-05	0.0019234	0.010819	34.5426	6.25718	5.57	1.55	0.22452	0.997037	45.8848
11.114	27.6508	27.6508	27.502	27.5742	27.728	27.802	4.2335e-05	0.0018454	0.01012	35.4155	6.00618	5.33	0.89	0.226257	0.997369	44.6936
11.124	27.6628	27.6628	27.5166	27.5872	27.7384	27.812	4.27862e-05	0.0017311	0.0093671	35.8017	5.5007	5.5	0.97	0.233598	0.997083	42.3992
11.134	27.6744	27.6748	27.5306	27.5998	27.7494	27.822	3.56939e-05	0.0015514	0.0084455	37.7928	5.94495	4.33	3.81	0.24006	0.996538	46.7559
11.144	27.6858	27.6868	27.5442	27.6122	27.7604	27.8324	2.64514e-05	0.0012608	0.0075082	37.1537	7.13187	5.36	4.2	0.240747	0.994238	55.7777
11.154	27.6978	27.6988	27.5572	27.6248	27.7718	27.8434	1.47409e-05	0.001105	0.0063683	37.4765	10.8547	7.41	7.18	0.230615	0.993969	83.8551
11.164	27.7102	27.7108	27.5702	27.6372	27.7838	27.8548	5.50366e-06	0.00088532	0.005356	37.8005	24.4515	10.46	3.93	0.242036	0.991243	179.693
11.174	27.7252	27.7252	27.5828	27.651	27.799	27.8696	9.24201e-06	0.00068063	0.0045065	34.4886	12.2515	9.57	1.42	0.244083	0.99081	87.772
11.184	27.7472	27.7476	27.596	27.668	27.8262	27.9002	8.16283e-06	0.00049054	0.0038722	31.9462	11.9188	13.2	1.79	0.224622	0.990344	73.771
11.194	27.7808	27.7822	27.6158	27.6932	27.8702	27.9542	1.10372e-05	0.00036421	0.0038002	29.808	8.65095	9.05	2.55	0.176221	0.991666	39.471
11.204	27.8296	27.832	27.6504	27.7342	27.9288	28.0252	1.65422e-05	0.00032477	0.0041502	28.5323	6.30367	14.64	3.63	0.12968	0.996974	21.5093
11.214	27.889	27.8924	27.6932	27.7852	27.9982	28.1142	1.96253e-05	0.00035941	0.0047642	28.0465	6.09946	11.13	3.77	0.116092	0.997592	19.0734
11.224	27.9486	27.9534	27.728	27.8308	28.074	28.217	2.42297e-05	0.00040031	0.0054526	27.8593	5.65421	11.56	2.87	0.114016	0.995918	17.8004
11.314	28.4926	28.4808	27.942	28.1186	28.8088	29.0862	0.000104708	0.0049201	0.016061	34.4254	3.854	5.12	1.71	0.325003	0.999379	41.0954
11.324	28.5574	28.5332	27.9624	28.1476	28.875	29.143	8.81766e-05	0.0051554	0.01627	33.996	4.63608	4.76	1.47	0.350088	0.999314	52.4618
11.334	28.6246	28.587	27.9834	28.1766	28.9396	29.198	6.98818e-05	0.005244	0.016103	33.3796	5.78975	5.42	0.78	0.357836	0.999748	66.3793
11.344	28.6948	28.6424	28.0036	28.2056	29.0036	29.2538	5.84109e-05	0.0050982	0.015686	32.6977	6.74738	5.62	0.78	0.364504	0.999191	77.4873
11.354	28.7676	28.6996	28.023	28.2346	29.068	29.3124	5.59884e-05	0.004813	0.015068	32.5548	6.76199	5.61	0.86	0.365747	0.999286	76.4784
11.364	28.842	28.7586	28.0426	28.264	29.1334	29.3742	6.96651e-05	0.004346	0.014407	31.888	5.19607	6.44	1.87	0.33982	0.998756	53.6409
11.374	28.9166	28.8184	28.0616	28.2932	29.2002	29.438	6.83202e-05	0.0037595	0.013592	31.5347	4.99863	4.6	2	0.324732	0.998572	48.5977
11.384	28.9914	28.879	28.0806	28.3216	29.2686	29.5054	5.33804e-05	0.0034324	0.012855	32.0253	6.05072	5.71	2.71	0.298917	0.99756	53.7014
11.394	29.0666	28.9394	28.0996	28.3506	29.3384	29.5776	4.25648e-05	0.0032398	0.012471	32.7263	7.36151	4.795	2.36	0.291795	0.999617	64.5838
11.404	29.1402	29.0004	28.119	28.3788	29.4106	29.6532	4.3874e-05	0.0031823	0.012292	33.8915	7.03934	4.93	2.69	0.283836	0.999419	61.8179
11.414	29.2132	29.0614	28.1382	28.4062	29.4854	29.7332	4.2557e-05	0.0031132	0.012113	35.2096	7.15151	5.59	2.95	0.282358	0.999362	63.5665
11.424	29.2854	29.122	28.1566	28.4342	29.5622	29.817	4.3888e-05	0.0030798	0.012075	36.5897	6.91286	6.15	3.22	0.274405	0.999374	60.2761
11.434	29.3556	29.1828	28.1752	28.4618	29.6422	29.9168	4.69461e-05	0.0030288	0.012136	38.0019	6.49521	6.23	3.07	0.269202	0.999285	55.4189
11.444	29.413	29.2348	28.1936	28.4888	29.7076	30.0136	4.47676e-05	0.0030875	0.01233	38.8559	6.92016	6.51	2.71	0.280994	0.998639	60.1417
11.454	29.445	29.265	28.2126	28.5154	29.7374	30.0546	4.56208e-05	0.0032504	0.01262	39.6774	6.95046	8.35	2.25	0.301161	0.998704	63.493
11.464	29.4638	29.2846	28.232	28.5418	29.753	30.067	5.97553e-05	0.0033761	0.012969	38.3258	5.45314	10.45	1.74	0.316927	0.997652	51.1603
11.474	29.4808	29.3032	28.252	28.5684	29.768	30.0766	7.86834e-05	0.0033507	0.012863	37.4377	4.10748	7.22	1.43	0.32339	0.997906	38.8138
11.484	29.4978	29.3216	28.2724	28.5944	29.7838	30.0864	8.20052e-05	0.0031734	0.012547	35.4846	3.84428	5.755	1.25	0.318407	0.997853	35.2624
11.494	29.5144	29.3406	28.2934	28.6208	29.8008	30.0982	6.28359e-05	0.0029701	0.012143	33.6911	4.85551	5.55	1.31	0.30737	0.997475	42.4996
11.504	29.5304	29.3592	28.3148	28.6474	29.8182	30.1116	5.22485e-05	0.0027636	0.012134	31.7579	5.83509	5.87	1.27	0.297962	0.99598	48.2713
11.514	29.546	29.3776	28.3368	28.6734	29.8362	30.126	4.60823e-05	0.0028247	0.012257	30.7822	6.68293	7.31	1.04	0.284326	0.997565	53.0855
11.524	29.5614	29.3966	28.36	28.6998	29.8542	30.141	4.85108e-05	0.0028212	0.012514	29.7687	6.48148	8.81	1.08	0.273099	0.998222	49.1024
11.534	29.5766	29.4156	28.3854	28.7268	29.873	30.156	5.48891e-05	0.0028393	0.013037	29.0369	5.96772	8.01	1.15	0.257823	0.998751	42.4164
11.544	29.5906	29.4346	28.4118	28.7538	29.8926	30.1718	5.62312e-05	0.0029431	0.01368	28.9062	6.1126	14.96	1	0.242544	0.999232	42.0301
11.554	29.6042	29.4532	28.4392	28.7808	29.9116	30.1888	5.70801e-05	0.0031187	0.014424	29.3442	6.34918	8.04	1.14	0.236613	0.999169	43.7683
11.564	29.6172	29.4716	28.4684	28.8082	29.9306	30.2058	6.41529e-05	0.0032887	0.015081	30.5838	5.90651	9.85	1.18	0.238	0.999627	41.4712
11.574	29.6302	29.4902	28.4994	28.8362	29.9492	30.2232	6.59184e-05	0.0033987	0.015503	31.8475	5.90917	8.94	1.21	0.238721	0.999745	42.3873
11.584	29.6424	29.5082	28.5312	28.8638	29.9672	30.2408	6.45929e-05	0.0034808	0.015641	33.1133	6.0841	8.03	1.21	0.244343	0.99964	44.9538
11.594	29.6538	29.5262	28.5638	28.8912	29.9848	30.2586	6.28172e-05	0.003624	0.01566	34.3642	6.26369	6.77	1.47	0.255255	0.999557	49.0184
11.604	29.6654	29.5442	28.5954	28.9192	30.0018	30.2776	6.0183e-05	0.0040752	0.015647	36.9491	6.53242	6.96	3.23	0.279247	0.999279	57.3301
11.614	29.6764	29.5622	28.6272	28.9476	30.0192	30.297	5.843e-05	0.0045968	0.015733	39.7879	6.76539	7.08	4.54	0.334696	0.997839	71.602
11.624	29.6874	29.5806	28.659	28.9766	30.0372	30.3162	6.8126e-05	0.0053274	0.016026	41.5123	5.91057	6.78	4.06	0.372137	0.998463	69.2012
11.634	29.6988	29.5992	28.6894	29.0056	30.0556	30.335	8.2677e-05	0.0056559	0.016116	42.8166	4.89767	6.55	3.14	0.401884	0.99896	61.8358
11.644	29.7104	29.6176	28.7204	29.0346	30.0746	30.355	8.39765e-05	0.0058266	0.015989	42.9088	4.78388	6.88	2.12	0.419395	0.999534	63.9346
11.654	29.7218	29.637	28.7506	29.064	30.094	30.375	6.37081e-05	0.0058641	0.015856	42.3984	6.2534	8.28	1.16	0.424465	0.999528	84.7145
11.664	29.7338	29.6566	28.7792	29.0936	30.1144	30.3954	3.87924e-05	0.005894	0.016115	41.0244	10.4376	8.12	0.97	0.419182	0.999351	138.331
11.674	29.7462	29.676	28.8068	29.123	30.1354	30.4168	3.83767e-05	0.0057093	0.016634	37.9824	10.8905	13	0.86	0.40222	0.998339	135.916
11.684	29.7588	29.6956	28.8338	29.1526	30.1568	30.4392	4.49824e-05	0.0052788	0.016886	34.7431	9.43195	13.61	0.94	0.369904	0.997744	107.069
11.694	29.7704	29.715	28.8604	29.1816	30.1788	30.4622	4.58705e-05	0.0046103	0.017061	33.2345	9.34518	10.88	2.58	0.314517	0.997289	89.9118
11.704	29.7822	29.735	28.8864	29.2102	30.2008	30.4864	5.73418e-05	0.0039778	0.017434	32.1155	7.6391	11.21	2.97	0.282899	0.996491	63.4197
11.714	29.7944	29.7546	28.912	29.2382	30.2228	30.512	4.98118e-05	0.0039104	0.018085	32.1323	9.12228	10.97	2.38	0.260237	0.998432	70.7102
11.724	29.8058	29.774	28.937	29.2662	30.2452	30.5378	5.5771e-05	0.0040175	0.018615	33.1075	8.38632	8.58	1.4	0.254093	0.99925	65.968
11.734	29.8178	29.794	28.9616	29.2938	30.2682	30.5652	5.75372e-05	0.0040942	0.018304	34.3312	7.99309	9.12	1.33	0.264609	0.999415	66.1208
11.744	29.8298	29.814	28.9856	29.3204	30.2912	30.5932	5.79905e-05	0.0039565	0.016916	36.554	7.32922	8.9	1.29	0.271125	0.999611	64.164
11.754	29.8418	29.8336	29.0092	29.3468	30.3146	30.6216	4.56316e-05	0.003604	0.01518	38.7258	8.35839	9.08	1.33	0.279432	0.999875	76.1007
11.764	29.8594	29.8578	29.0398	29.3794	30.3398	30.6498	3.6174e-05	0.0032776	0.013601	39.3428	9.44694	11.02	2.29	0.280592	0.999053	87.0183
11.774	29.8962	29.8978	29.0974	29.4324	30.3696	30.6756	2.68766e-05	0.0029906	0.012079	40.0158	11.2921	10.82	2.22	0.281186	0.997919	104.128
11.784	29.9532	29.9538	29.1844	29.509	30.4056	30.6992	2.60155e-05	0.0025977	0.011074	38.8669	10.6952	8.57	3.08	0.284981	0.999273	98.9834
11.794	30.0162	30.0158	29.2776	29.5932	30.4446	30.7218	3.35015e-05	0.0023773	0.010264	39.0295	7.69785	9.99	3.37	0.263803	0.9992	67.194
11.804	30.0796	30.0774	29.365	29.6754	30.4844	30.7446	4.07887e-05	0.0021491	0.010163	37.0649	6.26035	9.28	4.21	0.243669	0.996875	49.7932
11.814	30.144	30.1384	29.4484	29.7556	30.5254	30.7694	4.34316e-05	0.0020459	0.010313	37.3875	5.96618	9.45	3.32	0.229803	0.999806	42.8099
11.824	30.209	30.1994	29.5278	29.8342	30.5672	30.795	4.49801e-05	0.0020792	0.010612	37.4648	5.92781	9.19	2.74	0.226059	0.999894	41.4806
11.834	30.2732	30.2596	29.6036	29.911	30.6094	30.8208	4.58602e-05	0.0021433	0.010809	37.4356	5.92198	8.85	2.74	0.228066	0.99989	41.5175
11.844	30.3354	30.3178	29.676	29.9852	30.65	30.8474	3.4406e-05	0.0021605	0.010616	37.1964	7.75254	11.89	2.76	0.233344	0.999869	55.2666
11.854	30.3948	30.374	29.7452	30.057	30.6888	30.8734	2.84492e-05	0.002117	0.010127	36.6915	8.94393	10.27	2.9	0.240598	0.999706	64.8174
11.864	30.451	30.4278	29.8132	30.1266	30.7246	30.899	2.93266e-05	0.0020394	0.0094531	35.4259	8.09895	10.75	3.24	0.245724	0.999291	60.0989
11.874	30.5052	30.4794	29.8824	30.196	30.7586	30.9236	3.1084e-05	0.0019607	0.008821	35.5072	7.13013	9.85	3.56	0.25628	0.99967	54.1468
11.884	30.5586	30.5312	29.9558	30.2672	30.7918	30.9476	3.24095e-05	0.0018861	0.0083111	34.4059	6.44323	8.57	4.11	0.258277	0.998399	49.7139
11.894	30.6126	30.585	30.0364	30.3422	30.8246	30.9716	3.6367e-05	0.0018244	0.0081495	34.4861	5.63042	8.04	3.97	0.252154	0.999007	42.4643
11.904	30.6674	30.6412	30.1284	30.4218	30.8586	30.996	3.45963e-05	0.0018134	0.0082199	34.6332	5.96971	8.78	4.22	0.243065	0.998566	44.3226
11.914	30.7234	30.6996	30.2346	30.5046	30.8934	31.0218	3.65897e-05	0.0018668	0.0085942	34.8984	5.90151	8.63	4.32	0.235617	0.998349	43.2717
11.924	30.7794	30.7594	30.3502	30.589	30.9302	31.0496	3.79099e-05	0.0019609	0.0092069	34.8133	6.10208	7.67	4.25	0.230759	0.998	44.0967
11.934	30.8358	30.8204	30.4686	30.6732	30.969	31.0798	3.68286e-05	0.0020412	0.0096344	34.7978	6.57288	7.02	4.04	0.227614	0.997948	47.4441
11.944	30.8924	30.8818	30.5864	30.755	31.0106	31.1134	4.16501e-05	0.0020958	0.010157	33.6311	6.12726	8.66	3.96	0.223005	0.99808	42.8498
11.954	30.9492	30.9434	30.698	30.8322	31.0566	31.1514	3.90209e-05	0.0021385	0.010628	32.6456	6.84338	7.96	3.83	0.219639	0.99888	46.1137
11.964	31.0076	31.0048	30.7958	30.9024	31.1084	31.1964	3.96836e-05	0.0022242	0.011138	31.2973	7.05202	9.5	3.53	0.218122	0.998925	46.4273
11.974	31.067	31.066	30.874	30.9664	31.1656	31.2498	3.74968e-05	0.0023698	0.011706	29.9406	7.84388	9.36	3.2	0.224072	0.999285	51.6577
11.984	31.127	31.1264	30.937	31.0274	31.2254	31.3108	4.25654e-05	0.0025574	0.01214	29.0484	7.16603	8.69	2.85	0.236382	0.999499	48.4713
11.994	31.1862	31.1874	30.9946	31.0864	31.2876	31.3854	4.10008e-05	0.002714	0.012585	28.0451	7.7122	10.41	2.61	0.245184	0.999553	52.7258
12.004	31.2442	31.2484	31.0454	31.1404	31.354	31.4766	4.60961e-05	0.0028052	0.012714	27.4435	6.93002	11.31	2.45	0.251782	0.999597	47.9997
12.014	31.3018	31.3094	31.089	31.1898	31.4264	31.58	4.19051e-05	0.0028314	0.012618	26.9198	7.56554	10.64	2.38	0.257241	0.999591	52.8885
12.024	31.3584	31.3704	31.1278	31.2356	31.5036	31.6908	3.72635e-05	0.0028107	0.012413	26.5269	8.3697	10.35	2.35	0.259733	0.999398	58.7384
12.034	31.4144	31.431	31.1636	31.2784	31.583	31.802	3.4615e-05	0.0027531	0.012152	26.2717	8.82066	10.31	2.31	0.260825	0.999523	61.7016
12.044	31.4704	31.4906	31.1968	31.3186	31.6626	31.9076	3.50605e-05	0.002644	0.011753	25.6525	8.42262	10.02	2.31	0.262729	0.999483	58.4047
12.054	31.526	31.5484	31.2284	31.3576	31.7408	32.0018	3.54925e-05	0.0025067	0.011301	25.8754	8.00014	9.2	2.35	0.256227	0.99948	54.1693
12.064	31.5806	31.6036	31.2586	31.3958	31.8158	32.0832	3.57287e-05	0.002394	0.011218	25.3234	7.88888	9.28	2.38	0.241964	0.999097	50.2901
12.074	31.6338	31.6568	31.2876	31.4328	31.8858	32.153	3.52833e-05	0.0023633	0.011441	24.8299	8.14727	9.42	2.36	0.233117	0.999484	49.1338
12.084	31.6866	31.7084	31.3174	31.4702	31.952	32.2164	3.92353e-05	0.0024569	0.012108	24.4595	7.75375	9.55	2.27	0.226407	0.999514	44.8957
12.094	31.741	31.7602	31.3492	31.509	32.017	32.2774	4.03489e-05	0.0026601	0.013334	23.919	8.3032	10.31	2.12	0.221702	0.999679	46.3581
12.104	31.7972	31.8144	31.3838	31.5506	32.0828	32.3388	4.40891e-05	0.0029308	0.014627	23.8099	8.33568	10.02	1.89	0.219944	0.999554	45.9139
12.114	31.8564	31.8712	31.422	31.595	32.1506	32.4012	4.56488e-05	0.0031883	0.015944	23.4545	8.77576	9.71	1.62	0.219048	0.999618	47.5303
12.124	31.9186	31.93	31.4616	31.6408	32.22	32.4662	4.34372e-05	0.0033991	0.0168	23.1734	9.71772	9.1	1.64	0.222765	0.999517	52.7636
12.134	31.9822	31.9904	31.4998	31.6882	32.2912	32.5354	4.3883e-05	0.0035064	0.017274	23.0785	9.89039	9.07	1.55	0.220979	0.999727	53.253
12.144	32.046	32.0514	31.5356	31.7354	32.365	32.6076	4.124e-05	0.00348	0.017116	22.9229	10.428	8.95	1.58	0.220715	0.999628	55.7274
12.154	32.1106	32.1124	31.5684	31.781	32.4408	32.684	3.30615e-05	0.0033156	0.016331	22.8376	12.411	9.75	1.69	0.218431	0.999607	65.5959
12.164	32.1738	32.1738	31.5994	31.8252	32.5186	32.7652	2.27022e-05	0.0030879	0.015228	22.3476	16.8536	10.01	1.97	0.217107	0.998859	87.2338
12.174	32.2358	32.2346	31.6308	31.8682	32.5964	32.8474	1.3896e-05	0.0028598	0.01443	22.1965	26.0911	9.77	2.17	0.208991	0.999225	128.677
12.184	32.2942	32.2908	31.6668	31.9128	32.6648	32.9184	1.92087e-05	0.0027274	0.013991	21.7084	18.3007	14.24	2.55	0.20322	0.998785	85.9715
12.194	32.344	32.34	31.7124	31.9614	32.7154	32.9676	2.79987e-05	0.0026952	0.014041	21.5204	12.6002	13.22	2.85	0.197133	0.998982	56.7027
12.204	32.3894	32.3854	31.7634	32.0124	32.7564	33.0062	3.57317e-05	0.0027529	0.014463	21.5263	10.17	11.44	3.14	0.193109	0.999092	44.7306
12.214	32.435	32.431	31.8136	32.0626	32.797	33.0442	4.34216e-05	0.0029083	0.015494	21.4581	8.9655	10.54	3.25	0.191185	0.999165	38.9023
12.224	32.48	32.476	31.8618	32.1116	32.8374	33.0826	4.14357e-05	0.0031562	0.016642	21.8357	10.0913	9.62	3.2	0.191863	0.999227	44.9106
12.234	32.5254	32.521	31.908	32.1606	32.8784	33.122	4.38534e-05	0.0035514	0.017572	22.2226	10.0678	9.77	3.12	0.198716	0.999413	47.2689
12.244	32.571	32.566	31.9526	32.2092	32.9198	33.1636	4.23291e-05	0.0036949	0.018199	22.5749	10.8025	9.4	2.94	0.207357	0.999549	53.6581
12.254	32.6164	32.611	31.9962	32.2568	32.9622	33.2084	4.0789e-05	0.0038233	0.018379	22.8509	11.3213	8.27	2.94	0.215381	0.999752	59.109
12.264	32.662	32.656	32.0388	32.3038	33.0048	33.2548	4.09955e-05	0.003859	0.018101	23.1744	11.0939	8.67	2.87	0.223751	0.99975	60.7383
12.274	32.707	32.701	32.0804	32.35	33.0472	33.3034	3.96894e-05	0.0038223	0.017555	23.5465	11.1133	9.23	2.84	0.23015	0.999758	63.4679
12.284	32.752	32.746	32.121	32.395	33.0902	33.3552	3.96675e-05	0.003767	0.017032	23.764	10.7882	9.42	2.81	0.236237	0.999745	63.6289
12.294	32.797	32.791	32.1606	32.44	33.134	33.4094	4.38969e-05	0.0037164	0.016687	23.7922	9.55128	8.89	2.79	0.241857	0.999726	57.4916
12.304	32.842	32.836	32.1992	32.4846	33.1786	33.4658	4.18921e-05	0.0036955	0.016318	23.8749	9.78704	9.98	2.72	0.248955	0.999675	60.4433
12.314	32.8866	32.881	32.2372	32.5286	33.2234	33.524	4.07757e-05	0.0037334	0.016253	23.7748	10.015	10.26	2.65	0.254115	0.999592	62.9493
12.324	32.9306	32.926	32.2744	32.5726	33.2694	33.584	4.21037e-05	0.0038387	0.016417	23.6274	9.79693	9.18	2.54	0.259163	0.999474	62.5075
12.334	32.975	32.971	32.3108	32.6154	33.3158	33.644	4.80551e-05	0.0039788	0.016832	23.4308	8.80061	8.87	2.46	0.260917	0.999356	56.1834
12.344	33.0192	33.016	32.3478	32.6564	33.3628	33.7056	4.10226e-05	0.0041188	0.01746	23.0494	10.6939	9.15	2.37	0.259853	0.999296	67.0142
12.354	33.0622	33.0606	32.384	32.6974	33.4098	33.7688	4.49666e-05	0.0042477	0.018079	22.6753	10.1019	9.14	2.32	0.255884	0.999237	61.6013
12.364	33.1056	33.105	32.4186	32.7384	33.4572	33.8312	4.45563e-05	0.0043659	0.018722	22.3892	10.5575	9.3	2.32	0.249047	0.999085	62.2673
12.374	33.1492	33.1496	32.4526	32.779	33.5056	33.893	4.76314e-05	0.0045839	0.019339	21.9212	10.2014	8.4	2.35	0.245892	0.999249	58.2431
12.384	33.1922	33.1932	32.4866	32.819	33.5546	33.9514	5.62312e-05	0.0046029	0.019837	21.5428	8.86371	9.23	2.41	0.241778	0.999399	49.0546
12.394	33.2348	33.2366	32.5202	32.8586	33.6032	34.0062	6.52616e-05	0.0046479	0.020206	21.179	7.77929	7.15	2.49	0.236462	0.999574	41.4333
12.404	33.2772	33.2802	32.5528	32.8976	33.6512	34.058	8.02484e-05	0.0046213	0.02037	21.0305	6.37781	9.1	2.62	0.228645	0.999737	32.5614
12.414	33.3198	33.3228	32.5852	32.9362	33.6992	34.1072	0.000102087	0.0045815	0.020695	21.0095	5.09345	8.88	2.7	0.219827	0.999836	24.916
12.424	33.3618	33.3648	32.6178	32.9746	33.7468	34.1544	0.000124338	0.0046341	0.021554	21.2662	4.35554	8.64	2.77	0.212369	0.999834	20.7869
12.434	33.4034	33.4064	32.6502	33.0132	33.7934	34.1988	0.000141526	0.0048377	0.022901	22.0106	4.06571	10.44	2.52	0.216732	0.99947	20.4147
12.444	33.4448	33.447	32.6824	33.0512	33.839	34.24	0.000165563	0.0052816	0.02496	22.9724	3.78789	11.36	3.08	0.212938	0.999216	18.8768
12.454	33.4864	33.487	32.713	33.0892	33.8832	34.2788	0.00018782	0.0055881	0.027363	23.6663	3.66049	12.18	2.95	0.214869	0.999721	18.4901
12.464	33.5274	33.527	32.7438	33.1272	33.9254	34.315	0.000206116	0.0061918	0.029441	24.3035	3.58888	12.51	2.1	0.231097	0.999057	19.9936
12.474	33.5684	33.5662	32.7758	33.1648	33.966	34.35	0.000193344	0.0072441	0.031235	24.7299	4.05908	11.03	3.32	0.274236	0.99651	26.2072
12.484	33.6094	33.6046	32.8074	33.2018	34.0056	34.3834	0.000168853	0.008968	0.033924	25.3662	5.04796	11.75	2.66	0.334567	0.993395	40.0331
12.494	33.65	33.6432	32.8384	33.2392	34.0442	34.4152	0.000174155	0.011342	0.037543	25.928	5.4164	11.02	2.16	0.394432	0.990039	51.9337
12.504	33.69	33.6812	32.8698	33.2772	34.0814	34.447	0.000214927	0.014165	0.04125	26.6755	4.82226	9.98	1.78	0.45451	0.989439	53.8602
12.514	33.7304	33.7188	32.9022	33.3156	34.1174	34.4762	0.000344565	0.019781	0.063864	29.9719	4.65696	9.89	2.13	0.335376	0.999888	43.51
12.514	33.7304	33.7188	32.9022	33.3156	34.1174	34.4762	0.000252856	0.016268	0.044985	27.3671	4.47003	9.89	1.62	0.480258	0.9898	53.9002
12.524	33.771	33.7562	32.9356	33.355	34.153	34.5038	0.000293643	0.020148	0.064519	29.77	5.52058	7.33	2.24	0.335057	0.999694	51.5797
12.534	33.8114	33.7942	32.9696	33.3954	34.1876	34.5312	0.000212297	0.019038	0.062005	29.4189	7.33838	7.67	2.16	0.336905	0.999757	67.9521
12.544	33.8524	33.8322	33.004	33.436	34.2216	34.5592	0.000144385	0.016906	0.05609	28.5969	9.76068	6.62	1.88	0.325447	0.999558	86.9065
12.554	33.8934	33.8706	33.0394	33.4776	34.256	34.5868	0.000102741	0.013867	0.048094	27.2988	11.7615	7.2	2.3	0.320611	0.999684	100.203
12.564	33.9344	33.9096	33.077	33.5216	34.2906	34.6146	7.9817e-05	0.010894	0.040246	25.9448	12.6691	7.07	2.67	0.297574	0.99874	97.5657
12.574	33.9758	33.949	33.1174	33.5664	34.3242	34.6428	6.88106e-05	0.0085208	0.034346	24.4214	12.5412	7.07	2.58	0.274253	0.999427	85.6917
12.584	34.0174	33.9894	33.1596	33.6132	34.358	34.6706	6.87997e-05	0.0078075	0.03081	23.6013	11.2518	7.45	2.82	0.272328	0.999505	75.2823
12.594	34.0584	34.0304	33.204	33.6612	34.3926	34.6992	8.00315e-05	0.0090063	0.030274	23.3916	9.50443	7.32	1.4	0.328179	0.997904	75.1492
12.604	34.1002	34.0714	33.2502	33.7104	34.427	34.728	0.00012921	0.011935	0.032178	24.0037	6.2572	7.38	1.32	0.437343	0.991769	66.2906
12.614	34.1424	34.1132	33.2994	33.7614	34.4616	34.7576	0.000234573	0.015818	0.035775	24.6074	3.83195	7.24	1.35	0.533389	0.988968	51.5619
12.624	34.1838	34.1558	33.352	33.8136	34.496	34.787	0.00030268	0.020231	0.04008	25.4795	3.32707	6.43	0.82	0.593824	0.98625	52.4019
12.634	34.2258	34.1982	33.407	33.8668	34.5314	34.817	0.000355138	0.023754	0.04442	26.2039	3.14267	6.66	0.82	0.632472	0.985641	53.996
12.644	34.2678	34.2416	33.4644	33.92	34.567	34.847	0.000428978	0.025977	0.047166	26.5054	2.76256	7.41	0.77	0.647646	0.986511	49.4618
12.654	34.3098	34.2856	33.5266	33.9742	34.6024	34.8782	0.00036727	0.026541	0.047824	26.5273	3.27173	6.65	0.72	0.650095	0.985708	59.444
12.664	34.3518	34.3296	33.5914	34.0276	34.6384	34.9104	0.000231923	0.02562	0.047247	26.4465	5.11856	5.85	0.55	0.637681	0.985325	91.6254
12.674	34.3938	34.3736	33.6582	34.0812	34.6744	34.9418	0.000143288	0.023332	0.044831	26.1333	7.86115	6.63	0.96	0.60065	0.982761	133.898
12.684	34.4358	34.4176	33.7258	34.1342	34.7112	34.9742	8.88447e-05	0.019656	0.041056	25.5846	11.6108	6.64	0.71	0.559611	0.984386	184.423
12.694	34.4778	34.462	33.7932	34.1872	34.7488	35.008	7.14334e-05	0.015753	0.037101	24.9293	13.0497	6.34	1.17	0.483248	0.986588	176.514
12.704	34.5194	34.507	33.8612	34.2398	34.7862	35.0434	6.12857e-05	0.011491	0.033558	24.1949	13.7579	6.16	1.3	0.384633	0.989512	145.055
12.714	34.5612	34.552	33.93	34.2914	34.8242	35.0798	5.8438e-05	0.0085855	0.030954	23.4502	13.3088	5.82	2.26	0.306219	0.996983	105.168
12.724	34.6038	34.597	33.9996	34.3424	34.863	35.1172	5.40361e-05	0.0068321	0.02922	22.9552	13.5867	6.27	2.18	0.235493	0.997762	80.5036
12.734	34.6462	34.642	34.0678	34.393	34.903	35.1556	5.81984e-05	0.0060629	0.02825	22.3169	12.1962	6.95	3.44	0.205447	0.999531	60.3538
12.744	34.6888	34.6866	34.1352	34.4422	34.943	35.195	5.6449e-05	0.0056997	0.027231	22.0667	12.1206	6.78	1.78	0.201175	0.999487	57.3438
12.754	34.7312	34.731	34.2024	34.4902	34.9834	35.235	4.80814e-05	0.0051633	0.025924	21.7785	13.547	6.25	2.04	0.188931	0.999911	59.6302
12.764	34.7742	34.7764	34.268	34.5374	35.0252	35.2758	4.34341e-05	0.0048429	0.02389	21.3103	13.8198	6.38	1.86	0.187918	0.998907	59.8884
12.774	34.8172	34.822	34.3322	34.583	35.0682	35.3186	3.21984e-05	0.0041202	0.020947	21.2698	16.3458	6.41	3.23	0.181568	0.998752	67.1556
12.784	34.8602	34.867	34.3944	34.628	35.1112	35.363	1.72342e-05	0.0033652	0.017525	21.0168	25.5496	7.13	1.68	0.177672	0.999943	101.229
12.794	34.9032	34.912	34.4546	34.6726	35.155	35.4088	5.72853e-06	0.0027981	0.013989	20.5271	61.3565	7.85	3.5	0.177437	0.996578	246.101
12.804	34.9458	34.957	34.5124	34.7162	35.2	35.4566	2.28259e-07	0.0020379	0.010654	20.2058	1172.74	9.38	2.97	0.156801	0.997326	3931.45
12.814	34.9894	35.002	34.5676	34.7604	35.2446	35.5024	1.34466e-06	0.0013608	0.007522	19.9948	140.552	13.59	0.93	0.173688	0.998862	529.539
12.824	35.0366	35.0474	34.6204	34.8088	35.287	35.5386	3.10744e-06	0.00084373	0.004952	19.2547	40.04	19.05	1.12	0.177243	0.996227	147.874
12.834	35.0864	35.0938	34.6714	34.86	35.3282	35.5676	3.76747e-06	0.00055506	0.0032672	19.8299	21.7893	13.56	2.24	0.151876	0.995869	73.9567
12.844	35.1358	35.14	34.72	34.908	35.3716	35.5982	2.23011e-06	0.00034924	0.002507	18.8177	28.2453	17.83	3.44	0.120066	0.98725	77.0411
12.854	35.182	35.1846	34.7646	34.9514	35.4156	35.6324	3.53928e-06	0.00026498	0.002204	19.6288	15.6464	13.99	5.5	0.0913621	0.987779	35.6089
12.864	35.2278	35.2294	34.8082	34.9924	35.4624	35.672	3.55816e-06	0.00025651	0.002429	19.0379	17.1522	21.67	6.12	0.0787656	0.986143	33.0705
12.874	35.274	35.2758	34.8496	35.033	35.5154	35.7234	3.31935e-06	0.00033843	0.0034387	18.3294	26.029	20.76	4.33	0.0759551	0.988499	43.7947
12.884	35.3162	35.32	34.887	35.071	35.5678	35.78	9.20583e-07	0.0006187	0.0058049	18.4214	158.434	14.09	2.14	0.0801979	0.993687	264.789
12.894	35.3502	35.3552	34.9196	35.1036	35.6072	35.822	3.10745e-06	0.0011697	0.0099558	18.3209	80.4987	19.06	1.16	0.0943365	0.996176	149.74
12.904	35.377	35.3816	34.9478	35.1314	35.6328	35.8484	9.90885e-06	0.0022593	0.016132	18.393	40.9055	8.94	0.83	0.107433	0.997427	85.1784
12.914	35.4016	35.406	34.9744	35.157	35.6556	35.8694	2.84279e-05	0.0036001	0.024354	18.3684	21.525	19.71	0.73	0.11671	0.997941	48.5439
12.924	35.426	35.4306	34.9996	35.1824	35.6792	35.8904	5.20497e-05	0.0053247	0.033968	18.2953	16.3972	19.41	0.75	0.124582	0.998864	39.2625
12.934	35.451	35.4546	35.0236	35.208	35.7022	35.9118	6.90148e-05	0.0070212	0.043817	18.3182	15.9521	9.4	0.92	0.13773	0.996371	42.5054
12.944	35.4756	35.479	35.0472	35.2326	35.7256	35.9342	7.80311e-05	0.0087664	0.053511	18.3871	17.2303	12.67	0.8	0.139253	0.999034	45.9279
12.954	35.5	35.5036	35.0698	35.2566	35.7496	35.9584	8.42279e-05	0.010371	0.061974	18.3546	18.4872	10.18	1.29	0.148254	0.998751	52.3045
12.964	35.5246	35.528	35.0914	35.2802	35.774	35.9852	8.4456e-05	0.011664	0.068364	18.3385	20.3383	6.57	1.41	0.148341	0.999836	57.0972
12.974	35.5486	35.5526	35.1124	35.3036	35.7994	36.014	7.80595e-05	0.012635	0.072493	18.3102	23.3339	8.5	0.72	0.153187	0.999492	68.2287
12.984	35.5726	35.5766	35.133	35.3268	35.825	36.0444	7.91772e-05	0.013139	0.074636	18.2415	23.6846	4.68	0.75	0.154955	0.999842	69.4897
12.994	35.5966	35.601	35.1526	35.3492	35.8504	36.0766	7.5634e-05	0.013305	0.075274	18.1948	25.006	5.07	0.87	0.157701	0.999887	74.3951
13.004	35.6206	35.6256	35.1716	35.3718	35.8764	36.111	7.7606e-05	0.013397	0.075203	18.1254	24.3476	4.5	0.91	0.159752	0.999892	72.8939
13.014	35.6442	35.6496	35.191	35.3938	35.9024	36.1476	7.36404e-05	0.013472	0.075025	18.0666	25.598	5.26	0.93	0.16127	0.999901	76.9252
13.024	35.6672	35.674	35.2102	35.4154	35.9284	36.187	7.47403e-05	0.013573	0.075128	18.0158	25.256	4.3	0.96	0.162552	0.999902	76.0861
13.034	35.6902	35.6986	35.2282	35.4364	35.9544	36.2274	7.45297e-05	0.013723	0.075518	17.9726	25.4588	4.4	0.98	0.163811	0.999901	76.8915
13.044	35.7136	35.7226	35.2462	35.4574	35.9804	36.2688	7.97953e-05	0.013897	0.076019	17.9212	23.9366	4.08	0.99	0.165146	0.999898	72.4654
13.054	35.7368	35.747	35.2638	35.4784	36.0068	36.3112	7.89356e-05	0.014186	0.076567	17.874	24.3717	5.41	0.99	0.166152	0.999896	73.859
13.064	35.7596	35.7716	35.2808	35.499	36.0338	36.3546	7.65099e-05	0.014271	0.077164	17.8327	25.3404	4.05	1	0.166889	0.999898	76.7168
13.074	35.7828	35.7956	35.2978	35.5194	36.0612	36.399	7.7826e-05	0.01441	0.077487	17.7812	25.0162	4.1	0.99	0.167741	0.9999	75.7446
13.084	35.8052	35.8196	35.3152	35.54	36.0892	36.4436	7.32193e-05	0.014484	0.077629	17.7075	26.6388	4.08	0.97	0.168497	0.999903	80.4501
13.094	35.8278	35.8436	35.3324	35.56	36.1176	36.4884	7.2543e-05	0.014465	0.077331	17.6586	26.784	4.22	0.96	0.168667	0.999911	80.497
13.104	35.8498	35.8676	35.3484	35.5796	36.1462	36.5336	7.01161e-05	0.014368	0.076669	17.591	27.4738	4.3	0.94	0.16876	0.999915	82.0411
13.114	35.8722	35.892	35.3644	35.5986	36.1746	36.578	7.40804e-05	0.01423	0.075891	17.5412	25.7397	5.33	0.92	0.168396	0.999912	76.3063
13.124	35.8948	35.9162	35.3804	35.6176	36.2036	36.623	6.63456e-05	0.014088	0.074935	17.5871	28.3785	4.58	0.93	0.167836	0.999896	84.105
13.134	35.9168	35.9396	35.3964	35.6366	36.2326	36.6668	7.05519e-05	0.013966	0.074027	17.5786	26.3632	4.56	0.96	0.168951	0.999878	78.5748
13.144	35.9384	35.9636	35.412	35.6552	36.262	36.7088	6.92304e-05	0.013846	0.072773	17.6654	26.4113	4.59	1.02	0.170228	0.999889	79.894
13.154	35.9598	35.9876	35.4274	35.6736	36.2916	36.7512	7.01025e-05	0.01361	0.071024	17.7346	25.4559	4.54	1.09	0.172079	0.99989	78.2511
13.164	35.9818	36.0112	35.443	35.6922	36.321	36.7934	7.38752e-05	0.013105	0.068272	17.841	23.2199	4.3	1.16	0.172577	0.999872	72.1596
13.174	36.0038	36.0346	35.4576	35.7102	36.3506	36.834	6.8105e-05	0.012366	0.064316	17.9209	23.7278	4.12	1.22	0.173094	0.999877	74.5819
13.184	36.0258	36.0582	35.472	35.7286	36.38	36.8736	5.4688e-05	0.011392	0.059348	17.9994	27.2666	4.29	1.25	0.174962	0.999916	86.7868
13.194	36.0478	36.0816	35.487	35.7472	36.4096	36.9118	4.7175e-05	0.010248	0.053563	18.041	28.5279	4.34	1.37	0.170845	0.999989	88.8012
13.204	36.0694	36.1052	35.502	35.7648	36.439	36.9488	3.68296e-05	0.009125	0.047331	18.0315	32.2898	3.83	1.66	0.169481	0.999985	99.6155
13.214	36.0908	36.1282	35.517	35.7822	36.469	36.9854	3.08828e-05	0.0077009	0.04101	17.8647	33.3649	5.42	1.1	0.170163	0.999912	102.238
13.224	36.1124	36.1512	35.5316	35.7998	36.499	37.0218	2.60291e-05	0.0065919	0.035092	17.85	33.874	5.13	2.49	0.157625	0.999788	96.2347
13.234	36.1334	36.1738	35.5456	35.8168	36.5286	37.0584	2.47198e-05	0.005563	0.030575	17.6419	31.0769	4.95	1.34	0.157035	0.999762	86.5015
13.244	36.1548	36.1962	35.5596	35.8342	36.5576	37.094	2.55972e-05	0.0048793	0.027223	17.3458	26.7215	6.47	1.74	0.146608	0.999739	67.6208
13.254	36.1764	36.2192	35.5736	35.8518	36.5866	37.1286	2.29519e-05	0.0045426	0.024953	17.201	27.3163	7.56	1.52	0.145638	0.999003	68.1165
13.264	36.1974	36.2418	35.5876	35.8688	36.6152	37.1626	2.44647e-05	0.0042306	0.023783	17.026	24.4255	7.37	0.86	0.140417	0.998587	58.3167
13.274	36.2184	36.2638	35.6016	35.8854	36.6432	37.1958	2.66817e-05	0.0042099	0.023096	16.8265	21.749	9.54	0.84	0.139265	0.997851	51.0799
13.284	36.2398	36.2858	35.6156	35.9018	36.6712	37.2286	2.51682e-05	0.0041792	0.02253	16.7454	22.4919	5.84	0.82	0.139627	0.998362	52.9716
13.294	36.2614	36.3078	35.6296	35.9188	36.6992	37.263	2.44788e-05	0.0041171	0.02186	16.6136	22.4376	5.83	0.83	0.141414	0.997807	53.1521
13.304	36.2824	36.3298	35.6432	35.9358	36.7268	37.2972	2.18597e-05	0.0039571	0.020704	16.6419	23.7973	6.86	0.89	0.14197	0.998354	56.8627
13.314	36.3034	36.3518	35.6566	35.9528	36.7538	37.3314	2.18438e-05	0.0036855	0.01914	16.6204	22.0156	9.46	1	0.142105	0.997536	52.7061
13.324	36.3244	36.3734	35.6706	35.9694	36.7804	37.3674	1.7886e-05	0.0032711	0.017394	16.6014	24.4345	10.1	1.03	0.141632	0.998187	58.3361
13.334	36.345	36.3944	35.6842	35.9858	36.806	37.4026	1.36653e-05	0.0030208	0.015922	16.7078	29.2749	9.35	1.07	0.138813	0.998522	68.5899
13.344	36.3654	36.4158	35.6976	36.0024	36.831	37.4382	1.45615e-05	0.0026186	0.014561	16.9371	25.1247	8.63	1.03	0.134804	0.997641	58.3716
13.354	36.3864	36.4374	35.7116	36.0188	36.856	37.4754	1.56809e-05	0.0024925	0.013738	17.0392	22.0125	11.98	0.95	0.129435	0.997856	49.9046
13.364	36.407	36.4584	35.7252	36.0354	36.881	37.5122	1.85489e-05	0.0023242	0.013266	17.3172	17.9696	9.17	0.92	0.126214	0.997576	39.9258
13.374	36.4274	36.4794	35.7378	36.0518	36.9056	37.5506	2.02984e-05	0.0022521	0.013382	17.5286	16.5644	6.8	0.94	0.121913	0.997916	36.1831
13.384	36.448	36.5004	35.7506	36.0688	36.9292	37.5884	2.00699e-05	0.0022855	0.013802	17.7614	17.2788	6.15	0.91	0.122394	0.998201	38.3375
13.394	36.4684	36.5214	35.7646	36.0854	36.9526	37.6272	2.09693e-05	0.0024048	0.014494	18.0516	17.3668	6.38	0.85	0.125002	0.998836	39.9355
13.404	36.4894	36.5424	35.7782	36.1018	36.9766	37.6702	2.20557e-05	0.0025678	0.015101	18.1484	17.2029	6.81	0.86	0.131885	0.998907	41.8283
13.414	36.5104	36.5638	35.7912	36.1184	37.0002	37.712	1.9638e-05	0.0027053	0.015528	18.316	19.8672	6.18	0.83	0.136834	0.999166	51.1356
13.424	36.5314	36.5854	35.8046	36.1352	37.0232	37.7528	2.38188e-05	0.0027652	0.015522	18.456	16.3736	6.73	0.83	0.143748	0.999328	44.5741
13.434	36.5524	36.6064	35.8186	36.1528	37.0462	37.7948	2.0953e-05	0.002713	0.015129	18.6208	18.1419	5.02	0.83	0.147338	0.999521	51.1097
13.444	36.5734	36.6278	35.833	36.1698	37.0692	37.8368	2.11943e-05	0.0025903	0.014343	18.875	17.0035	5.42	0.84	0.149731	0.999623	49.4237
13.454	36.5944	36.6494	35.8484	36.1868	37.0922	37.88	1.47951e-05	0.0024709	0.013577	19.0456	23.057	5.79	0.85	0.153538	0.999643	69.3946
13.464	36.6154	36.6708	35.8636	36.2042	37.1156	37.9242	1.65417e-05	0.0024061	0.012951	19.2978	19.6716	8	0.88	0.159308	0.999665	62.5267
13.474	36.6368	36.6924	35.8784	36.2218	37.1392	37.962	1.98607e-05	0.0023764	0.012532	19.6504	15.8541	6.94	0.96	0.166086	0.999735	53.7494
13.484	36.6584	36.7134	35.8948	36.2396	37.1622	37.986	2.49182e-05	0.0023481	0.012257	19.9743	12.359	11.98	1.11	0.173104	0.999832	44.5979
13.494	36.6802	36.734	35.9118	36.2578	37.1856	37.9982	3.04406e-05	0.0023434	0.012048	20.5655	9.94442	15.74	1.25	0.178699	0.999842	38.1958
13.504	36.7032	36.7544	35.9292	36.2752	37.2092	38.0062	3.3959e-05	0.0024006	0.012294	20.8888	9.09609	9.91	1.39	0.182969	0.999781	36.3644
13.514	36.7258	36.7754	35.9464	36.2936	37.2326	38.0146	3.06556e-05	0.0025055	0.012693	21.3586	10.4033	7.435	1.44	0.184681	0.999549	43.2645
13.524	36.7482	36.7964	35.9632	36.3126	37.2562	38.0236	3.41781e-05	0.0026055	0.013105	21.6429	9.63399	5.96	1.42	0.188876	0.999738	41.5178
13.534	36.7708	36.8174	35.9816	36.3316	37.2796	38.033	3.22087e-05	0.0026731	0.013218	22.4427	10.3112	7.58	1.42	0.189374	0.999646	46.4875
13.544	36.7932	36.8384	36.0002	36.3506	37.3036	38.043	3.39581e-05	0.0027242	0.01352	22.6936	10.0035	8.6	1.36	0.193484	0.999803	46.2836
13.554	36.8162	36.8594	36.019	36.37	37.3276	38.0534	2.9762e-05	0.002776	0.01396	23.6397	11.7853	9.61	1.19	0.19068	0.999838	55.46
13.564	36.8392	36.8808	36.0386	36.3896	37.3516	38.0648	3.50635e-05	0.0028327	0.014874	24.0991	10.6583	10.66	1.08	0.185674	0.999753	49.1937
13.574	36.8622	36.9028	36.058	36.409	37.376	38.0772	4.10208e-05	0.0029116	0.015648	24.864	9.58456	10.55	0.86	0.181803	0.999721	44.2898
13.584	36.8852	36.9248	36.078	36.4286	37.4006	38.0906	4.63004e-05	0.0030577	0.016728	25.7562	9.0777	12.19	0.84	0.178763	0.999712	42.518
13.594	36.9082	36.9464	36.0976	36.448	37.425	38.105	4.43386e-05	0.0033512	0.018042	26.3706	10.224	11.84	0.64	0.19298	0.997831	53.9756
13.604	36.9316	36.9678	36.1178	36.4676	37.4504	38.1196	5.20397e-05	0.0038415	0.01949	27.3741	9.41009	10.67	2.12	0.192369	0.99933	49.8696
13.614	36.9552	36.9902	36.139	36.487	37.4756	38.1356	5.6018e-05	0.0041435	0.02064	27.8932	9.25761	9.83	1.25	0.19693	0.999604	52.1761
13.624	36.9782	37.0128	36.1594	36.507	37.5004	38.1542	6.52677e-05	0.0044453	0.021064	28.4368	8.10885	11.13	1.1	0.199962	0.999519	46.9298
13.634	37.0016	37.0348	36.1804	36.5266	37.526	38.1718	6.35032e-05	0.0043457	0.020793	28.6388	8.22695	10.275	1.25	0.204015	0.999739	49.5393
13.644	37.0252	37.0568	36.201	36.546	37.551	38.1888	5.48972e-05	0.0042153	0.019966	28.917	9.13813	10.11	1.44	0.202825	0.999764	55.9791
13.654	37.0482	37.0792	36.221	36.5656	37.576	38.2062	5.16006e-05	0.0039907	0.01866	28.8858	9.08602	10.7	1.61	0.205972	0.999842	57.0264
13.664	37.0716	37.1018	36.241	36.585	37.6014	38.225	6.21722e-05	0.0036902	0.016929	28.7588	6.84151	8.78	1.67	0.208493	0.999592	44.1065
13.674	37.0956	37.1238	36.2614	36.605	37.6274	38.2442	8.33385e-05	0.0031838	0.015029	28.3039	4.53107	10.4	1.75	0.207548	0.999376	29.331
13.684	37.1192	37.1458	36.2812	36.6246	37.6522	38.2598	9.63384e-05	0.0028527	0.013536	28.0096	3.53027	10.76	2.05	0.201017	0.999711	22.3732
13.694	37.143	37.1674	36.2996	36.6436	37.6752	38.2698	8.04743e-05	0.0024611	0.012605	27.7881	3.93552	10.17	1.87	0.189272	0.999218	23.5355
13.704	37.1676	37.1888	36.3186	36.663	37.6986	38.2768	5.97619e-05	0.0024188	0.012556	27.7618	5.2789	14.31	2.1	0.177303	0.999552	29.666
13.714	37.1924	37.2104	36.3376	36.6826	37.7218	38.2838	4.96123e-05	0.0024123	0.013022	27.8957	6.59486	13.28	2.16	0.168177	0.99967	35.0579
13.724	37.2176	37.2318	36.3562	36.7016	37.7446	38.2912	4.96215e-05	0.0024683	0.013789	27.8218	6.982	11.13	2.13	0.161556	0.999706	35.2931
13.734	37.2416	37.2534	36.3738	36.7206	37.7682	38.2988	4.3877e-05	0.0025505	0.01441	27.8634	8.25172	11.86	2.06	0.161177	0.999564	40.3743
13.744	37.266	37.2748	36.3908	36.7396	37.7916	38.3062	4.27526e-05	0.0026039	0.014834	27.8594	8.71792	12.17	2.07	0.160516	0.999741	41.3612
13.754	37.2902	37.2964	36.4078	36.7586	37.8156	38.315	3.35392e-05	0.0025826	0.014831	27.8512	11.1105	12.81	1.97	0.160318	0.999689	51.4234
13.764	37.314	37.3174	36.424	36.7772	37.8392	38.3246	3.48435e-05	0.0024882	0.014268	28.0297	10.2886	12.86	1.87	0.161164	0.99977	47.5038
13.774	37.3382	37.3388	36.4394	36.7956	37.8626	38.334	2.73465e-05	0.002348	0.013153	28.7649	12.0848	12.3	1.76	0.164369	0.999618	57.6564
13.784	37.3612	37.3604	36.455	36.8146	37.8866	38.3436	2.99974e-05	0.0022153	0.012339	28.9895	10.3351	13.24	1.65	0.168017	0.999807	50.6977
13.794	37.3842	37.3814	36.4704	36.8332	37.9102	38.353	3.0212e-05	0.0021148	0.011415	30.4434	9.49321	11.95	1.76	0.169915	0.99963	49.285
13.804	37.4076	37.4024	36.486	36.8512	37.9336	38.3638	3.65983e-05	0.0020162	0.010534	31.7485	7.23186	11.58	1.99	0.179318	0.999693	39.9992
13.824	37.4552	37.4448	36.5164	36.8872	37.982	38.3892	2.82098e-05	0.0017822	0.010216	33.5708	9.09908	8.36	3.28	0.153005	0.999852	45.6685
13.834	37.4782	37.4664	36.5316	36.9048	38.007	38.4026	2.60151e-05	0.0016498	0.0099175	34.9403	9.57841	7.89	3.63	0.148027	0.999741	47.8107
13.844	37.5012	37.4874	36.5456	36.9226	38.032	38.4174	2.22398e-05	0.0016089	0.010008	36.4009	11.3066	7.25	3.94	0.143922	0.999433	56.3629
13.854	37.5242	37.5088	36.56	36.9408	38.057	38.4342	2.71003e-05	0.0016554	0.010454	37.8886	9.69225	8.18	4.39	0.142369	0.999896	48.1986
13.864	37.5472	37.5308	36.575	36.9586	38.0824	38.4518	3.21796e-05	0.001742	0.011162	37.367	8.71521	9.39	4.59	0.141918	0.999655	42.5673
13.874	37.5698	37.5524	36.5896	36.9768	38.108	38.4696	3.48062e-05	0.0018179	0.011761	37.8168	8.48993	9.28	4.73	0.143737	0.999888	40.8921
13.884	37.5926	37.5738	36.6036	36.9942	38.1334	38.4894	4.18721e-05	0.0018691	0.012103	37.3187	7.26249	9.22	4.54	0.143199	0.999821	34.7917
13.894	37.6162	37.5954	36.618	37.0122	38.1594	38.5112	4.07666e-05	0.0019335	0.012417	36.6954	7.65296	10.52	4.36	0.146047	0.999875	36.7384
13.904	37.6388	37.6168	36.6326	37.0302	38.1854	38.5346	3.81298e-05	0.0020246	0.012474	36.4828	8.21974	9.78	4.32	0.15217	0.999939	40.8578
13.914	37.6864	37.6604	36.6566	37.0682	38.2314	38.579	3.32812e-05	0.002089	0.012339	36.158	9.31532	9.55	4.37	0.158656	0.999929	48.1263
13.924	37.8228	37.7908	36.7056	37.1562	38.393	38.7904	2.80087e-05	0.0020659	0.01191	35.9038	10.684	8.66	4.43	0.162217	0.999915	56.1718
13.934	38.0024	37.9876	36.7588	37.2426	38.707	39.1576	3.06407e-05	0.0019504	0.011195	35.9144	9.17999	8.2	4.34	0.162552	0.99981	48.0896
13.944	38.0882	38.1132	36.7966	37.2776	38.9554	39.3612	3.54706e-05	0.0018215	0.010579	35.3503	7.49365	8.78	4.27	0.15939	0.999855	38.5221
13.954	38.1046	38.1522	36.8352	37.3066	39.0162	39.4048	3.50544e-05	0.0017702	0.010264	35.5087	7.35683	8.95	4.21	0.157038	0.999838	37.6329
13.964	38.119	38.1698	36.8724	37.336	39.025	39.4114	3.06488e-05	0.0017958	0.010247	34.7575	8.4004	7.94	4.13	0.158216	0.999624	43.2904
13.974	38.134	38.1872	36.908	37.3656	39.035	39.4174	3.37128e-05	0.0018477	0.01022	33.47	7.61682	10.2	3.92	0.162642	0.999151	39.7179
13.984	38.149	38.2048	36.9426	37.3954	39.0446	39.4234	3.32742e-05	0.0018741	0.010332	32.4081	7.80177	8.13	3.45	0.16245	0.999561	39.463
13.994	38.1636	38.2222	36.9766	37.4256	39.0536	39.4298	3.37186e-05	0.0018872	0.01076	30.9234	8.01789	8.87	2.93	0.154568	0.999664	37.4304
14.004	38.1788	38.2402	37.0102	37.455	39.063	39.4372	3.349e-05	0.0019595	0.011742	29.2867	8.80934	8.01	2.51	0.146137	0.999793	37.2439
14.014	38.1954	38.2578	37.0424	37.4846	39.073	39.4448	3.43986e-05	0.0021416	0.012936	28.4088	9.44878	8.43	2.28	0.14001	0.999785	37.9027
14.024	38.2114	38.2752	37.073	37.5136	39.083	39.4518	3.61491e-05	0.0024127	0.014467	27.5355	10.0554	9.16	2.09	0.139073	0.999824	39.2679
14.034	38.2274	38.2928	37.1026	37.5422	39.0926	39.4592	3.74897e-05	0.0027173	0.016242	26.8267	10.8854	7.86	1.99	0.137158	0.999792	41.3473
14.044	38.2434	38.3102	37.1312	37.5702	39.102	39.4668	4.69476e-05	0.0030022	0.017953	26.201	9.60816	5.5	1.92	0.136021	0.999666	35.4161
14.054	38.2594	38.3278	37.1592	37.5982	39.1116	39.4746	5.42e-05	0.0032479	0.019402	25.796	8.99423	5.4	1.85	0.134287	0.99973	32.5295
14.064	38.2758	38.3448	37.186	37.6258	39.121	39.4836	5.81926e-05	0.0034893	0.020747	25.4193	8.95786	5.46	1.79	0.134851	0.999746	32.0419
14.074	38.2928	38.3618	37.2118	37.6532	39.131	39.493	5.35823e-05	0.0037188	0.021916	25.2189	10.2768	6.22	1.71	0.13559	0.999595	36.7714
14.084	38.3094	38.3788	37.238	37.6808	39.1406	39.503	4.91442e-05	0.0039006	0.022833	24.918	11.6737	6.32	1.54	0.13721	0.999749	41.9155
14.094	38.3254	38.3954	37.263	37.7074	39.15	39.513	4.86932e-05	0.0040272	0.02329	25.1719	12.0176	7.13	1.36	0.138504	0.99944	43.7248
14.104	38.341	38.4114	37.288	37.733	39.1596	39.5226	4.82739e-05	0.0041013	0.023437	25.6748	12.1985	7.61	1.22	0.139993	0.999409	45.6022
14.114	38.356	38.4274	37.3122	37.758	39.1682	39.5316	4.84814e-05	0.0041732	0.023643	26.112	12.253	7.81	1.21	0.143416	0.999557	47.4883
14.124	38.371	38.443	37.3344	37.7822	39.1766	39.541	4.78438e-05	0.0042597	0.023956	26.5828	12.5807	8.96	1.27	0.148244	0.999865	50.9324
14.134	38.386	38.4584	37.3554	37.8052	39.1852	39.5506	4.93758e-05	0.0043417	0.02391	27.5343	12.167	9.59	1.36	0.152201	0.999729	52.2017
14.144	38.401	38.474	37.3772	37.8282	39.1932	39.5596	5.0264e-05	0.0043359	0.023613	28.1848	11.8035	9.83	1.52	0.157771	0.999955	53.3026
14.154	38.4156	38.4886	37.3998	37.8512	39.2016	39.5686	4.98088e-05	0.0042883	0.022927	29.0935	11.5653	9.13	1.55	0.160049	0.999936	54.4442
14.164	38.4304	38.503	37.4222	37.8742	39.2102	39.578	4.62776e-05	0.0041263	0.021943	29.6609	11.9136	10.96	1.58	0.161979	0.999976	57.8725
14.174	38.446	38.518	37.4448	37.8976	39.2182	39.5876	3.98936e-05	0.0039308	0.020872	29.735	13.1455	7.11	1.6	0.165097	0.99995	65.2385
14.184	38.461	38.533	37.4664	37.9212	39.2262	39.597	3.48414e-05	0.0037178	0.019631	30.1796	14.1568	9.61	1.71	0.16621	0.99999	71.2429
14.194	38.4764	38.5484	37.4878	37.9446	39.2342	39.6074	3.242e-05	0.0033704	0.018542	30.1068	14.3701	7.62	1.94	0.162297	0.999897	70.7526
14.204	38.4928	38.5644	37.5098	37.9686	39.2426	39.6184	3.70362e-05	0.0031216	0.017548	30.0373	11.9047	5.79	2.1	0.154984	0.999975	55.8373
14.214	38.5098	38.5804	37.5314	37.9922	39.2512	39.629	3.94617e-05	0.0028293	0.016747	29.8158	10.663	5.98	2.47	0.144547	0.999896	46.886
14.224	38.5268	38.5964	37.554	38.0164	39.2596	39.6398	4.0772e-05	0.0026338	0.016323	29.9231	10.059	6.82	2.71	0.133591	0.999951	41.3078
14.234	38.5442	38.6128	37.5778	38.042	39.2686	39.6514	4.01065e-05	0.0025095	0.016559	29.7703	10.3738	6.95	2.64	0.122801	0.999961	39.4873
14.244	38.5622	38.6298	37.6002	38.0666	39.2776	39.6632	4.32172e-05	0.0025239	0.016996	29.6514	9.88114	6.3	2.31	0.115903	0.999913	35.5483
14.254	38.5806	38.6468	37.622	38.0914	39.2866	39.6758	4.82695e-05	0.0025546	0.017432	29.3666	9.07385	6.63	1.95	0.111278	0.999775	31.0175
14.264	38.6	38.6638	37.642	38.117	39.2956	39.6882	5.13532e-05	0.0024955	0.017467	29.2796	8.54609	9.43	1.53	0.105182	0.999367	27.6049
14.348	38.7738	38.8116	37.7898	38.314	39.3752	39.8156	8.57488e-05	0.0013461	0.010822	26.3307	3.171	12.15	3.38	0.0712314	0.986562	5.97909
14.358	38.7964	38.8294	37.8058	38.3356	39.3858	39.8318	6.48289e-05	0.0015416	0.012379	26.0214	4.79771	9.3	3.44	0.0728099	0.985738	9.02391
14.368	38.8186	38.8474	37.821	38.3552	39.3968	39.8494	5.42378e-05	0.0017427	0.013847	25.9159	6.41462	7.44	3.46	0.0725948	0.986891	11.994
14.378	38.8414	38.8646	37.8352	38.3742	39.4086	39.8666	4.85098e-05	0.0019482	0.015595	25.8986	8.07743	7.13	3.41	0.0720255	0.98633	14.8049
14.388	38.8628	38.8832	37.85	38.3932	39.4206	39.8852	4.98182e-05	0.0021984	0.01747	25.5237	8.81092	4.8	3.26	0.0714722	0.986025	15.9695
14.398	38.9038	38.9206	37.893	38.4346	39.4486	39.9106	5.06969e-05	0.0024722	0.019456	25.4806	9.64248	4.8	3.01	0.0707444	0.985096	17.322
14.408	38.9786	38.9914	37.9894	38.5168	39.503	39.9496	5.44472e-05	0.0028629	0.021552	24.994	9.94555	5.77	2.71	0.0710108	0.983815	17.7785
14.418	39.0694	39.0782	38.107	38.6182	39.571	39.998	5.51149e-05	0.0030473	0.02326	24.7661	10.6037	4.71	2.41	0.0721092	0.982342	19.1182
14.428	39.1616	39.168	38.2222	38.7182	39.645	40.0512	5.37933e-05	0.0032615	0.024475	24.5861	11.4317	4.61	2.19	0.0731194	0.981672	20.7981
14.438	39.2552	39.2572	38.329	38.814	39.7224	40.11	5.18154e-05	0.0034123	0.024912	24.3642	12.08	4.95	2.09	0.0748549	0.981321	22.3254
14.448	39.3492	39.3462	38.43	38.9066	39.8028	40.1748	4.73902e-05	0.0034711	0.024701	24.1091	13.0961	4.7	2.03	0.0767261	0.981024	24.6465
14.458	39.4416	39.4344	38.5236	38.9954	39.8862	40.2496	4.01303e-05	0.0034788	0.023789	23.8686	14.8943	4.88	2	0.0792475	0.980935	28.699
14.468	39.5312	39.5208	38.6116	39.081	39.9686	40.329	3.83628e-05	0.0034055	0.022415	23.4279	14.6806	4.99	2.04	0.0824393	0.983093	29.0307
14.478	39.6178	39.6036	38.6954	39.1628	40.049	40.4082	3.43919e-05	0.0032819	0.020638	23.3452	15.0775	4.81	2.12	0.0859248	0.983688	30.9143
14.488	39.703	39.6848	38.7752	39.2438	40.1274	40.4856	3.4168e-05	0.0031178	0.018783	23.0171	13.8122	4.73	2.23	0.0904545	0.984805	29.4573
14.498	39.788	39.7658	38.8518	39.3216	40.2054	40.5594	3.37253e-05	0.0029132	0.016985	22.991	12.654	6.26	2.39	0.0933296	0.985925	27.8375
14.508	39.8746	39.8468	38.9286	39.401	40.285	40.6324	3.10755e-05	0.0026677	0.01543	22.9342	12.4757	7.72	2.6	0.0949509	0.987642	28.0938
14.518	39.9616	39.9294	39.0008	39.4794	40.369	40.7094	2.99797e-05	0.0024445	0.013803	23.0857	11.5681	6	2.87	0.0982299	0.988599	27.3842
14.528	40.0486	40.0132	39.0702	39.5542	40.4572	40.7938	2.51394e-05	0.0022484	0.012444	23.3983	12.4372	6.06	3.28	0.101843	0.989865	31.4547
14.538	40.1348	40.0964	39.1368	39.6266	40.5518	40.8854	2.14021e-05	0.0021006	0.011221	24.0257	13.1732	5.68	3.47	0.110067	0.993494	37.5211
14.548	40.2168	40.1802	39.202	39.6946	40.6518	40.9832	2.02842e-05	0.0020195	0.01016	25.6118	12.585	4.51	3.43	0.12107	0.997175	42.9457
14.558	40.293	40.2634	39.2694	39.7616	40.7584	41.0934	2.11615e-05	0.0019622	0.0094048	27.4433	11.1666	5.32	3.19	0.13634	0.998804	45.8601
14.568	40.364	40.3464	39.3422	39.8286	40.8704	41.2152	2.40433e-05	0.0018878	0.0088344	29.9408	9.23209	5.16	3.03	0.150002	0.999626	44.3201
14.578	40.4284	40.4198	39.4194	39.8964	40.961	41.3024	2.88862e-05	0.0018106	0.0083963	32.9017	7.30322	5.09	3	0.160599	0.999863	39.1398
14.588	40.4842	40.478	39.5046	39.9668	41.0092	41.3404	3.12974e-05	0.0017528	0.0081167	34.8194	6.51611	4.99	2.95	0.170641	0.999799	37.4153
14.598	40.5366	40.529	39.5972	40.0394	41.0362	41.3564	2.99962e-05	0.0016938	0.0077807	37.5581	6.51733	7.85	3.37	0.177259	0.99975	40.0951
14.608	40.587	40.5798	39.696	40.1124	41.0618	41.3702	3.15225e-05	0.0016264	0.0074163	40.3163	5.91131	4.92	3.49	0.180078	0.999742	37.8999
14.618	40.637	40.6308	39.7984	40.1854	41.0886	41.385	3.24217e-05	0.0014992	0.0070525	39.9516	5.46542	6.16	3.64	0.181241	0.99918	34.6897
14.628	40.6878	40.6818	39.9022	40.2576	41.1156	41.4016	3.02198e-05	0.0013298	0.0064734	39.9897	5.38218	6.21	3.87	0.181036	0.999275	33.1472
14.638	40.738	40.7328	40.003	40.3288	41.1418	41.417	2.75554e-05	0.0011544	0.0060272	38.9139	5.49574	6.18	4.04	0.169561	0.998254	31.3863
14.648	40.7888	40.7838	40.0982	40.399	41.1694	41.4328	2.60018e-05	0.0010496	0.0059466	38.317	5.74622	6.51	3.89	0.151643	0.997094	29.6991
14.658	40.8414	40.8348	40.1866	40.469	41.1998	41.452	2.66753e-05	0.0010167	0.006015	37.5931	5.66556	6.77	3.84	0.139628	0.997399	27.6544
14.668	40.8952	40.8866	40.268	40.5358	41.234	41.4744	2.86559e-05	0.0010264	0.0061911	36.7069	5.42838	7.73	3.5	0.132549	0.997717	25.6034
14.678	40.9492	40.9394	40.3392	40.6018	41.2706	41.5014	2.6018e-05	0.0010513	0.0064693	35.5313	6.24742	9.1	3.08	0.125992	0.998296	28.1936
14.688	41.0048	40.9916	40.4018	40.6654	41.3116	41.5358	2.86662e-05	0.0010889	0.0069178	34.0471	6.06338	8.24	2.67	0.119063	0.998887	25.6556
14.698	41.0592	41.0452	40.4596	40.7252	41.356	41.5774	2.80067e-05	0.0011405	0.0072184	33.3679	6.47584	9.68	2.37	0.115761	0.999496	26.7079
14.708	41.1156	41.1016	40.5238	40.789	41.405	41.6236	2.81992e-05	0.0011916	0.0075641	32.1212	6.73966	11.03	2.27	0.114322	0.999723	27.021
14.718	41.175	41.1618	40.5962	40.8564	41.4574	41.6714	3.04344e-05	0.001213	0.0076991	31.3431	6.35612	7.99	2.14	0.112638	0.999825	24.8518
14.728	41.2358	41.2228	40.6662	40.9244	41.512	41.7202	3.108e-05	0.001199	0.0077962	30.3771	6.30258	12.99	2.12	0.108652	0.999805	23.2339
14.738	41.2968	41.2838	40.7312	40.9916	41.5678	41.7756	3.10879e-05	0.0011806	0.0080225	29.3235	6.48388	6.35	2.05	0.104309	0.999402	22.0182
14.748	41.357	41.3448	40.7944	41.057	41.6254	41.8374	3.0656e-05	0.0012072	0.0084365	28.5947	6.91455	6.15	2.21	0.101856	0.999829	21.9866
14.758	41.4178	41.4066	40.8534	41.1204	41.6842	41.9068	3.12982e-05	0.0013101	0.0088491	28.9313	7.10389	7.46	2.26	0.103487	0.999463	23.0387
14.768	41.4772	41.4678	40.9098	41.1818	41.7448	41.9826	3.48346e-05	0.0014717	0.0096851	29.2927	6.9857	5.42	2.16	0.104447	0.999403	23.2407
14.778	41.5362	41.5288	40.9634	41.2412	41.8066	42.0628	3.74882e-05	0.0016273	0.010766	29.1191	7.21566	6.37	2.09	0.104177	0.999582	24.087
14.788	41.5952	41.589	41.0156	41.2994	41.8702	42.147	4.09976e-05	0.0017703	0.011775	29.0004	7.21638	5.43	1.98	0.103803	0.99941	23.8407
14.798	41.6534	41.649	41.0652	41.355	41.9334	42.2304	3.74774e-05	0.0019095	0.012586	28.6216	8.43791	6.14	1.84	0.104498	0.999442	27.9582
14.808	41.7106	41.7082	41.1134	41.4092	41.998	42.3102	3.68093e-05	0.0020535	0.013561	28.5906	9.25659	7.47	1.86	0.103886	0.999377	30.4054
14.818	41.7676	41.7664	41.1598	41.4632	42.0622	42.386	3.59293e-05	0.0021955	0.014277	28.4432	9.98402	6.05	1.84	0.104775	0.999101	33.051
14.828	41.823	41.8228	41.2066	41.5156	42.1254	42.4546	3.96795e-05	0.0023035	0.014792	28.2907	9.3665	10.29	2.05	0.104375	0.999484	30.7917
14.838	41.8772	41.878	41.252	41.5652	42.186	42.516	3.96748e-05	0.0023548	0.015036	27.8816	9.52213	9.92	2.02	0.105801	0.999043	31.2969
14.848	41.9312	41.9314	41.2954	41.6158	42.2436	42.5736	4.19087e-05	0.002372	0.015444	27.4172	9.25918	8.96	2.15	0.103073	0.998534	28.9677
14.858	41.9836	41.9836	41.3384	41.6668	42.299	42.6258	4.29889e-05	0.0024068	0.015973	26.9209	9.33569	9.56	2.27	0.100225	0.998248	27.6001
14.868	42.0364	42.0348	41.3814	41.7178	42.3532	42.6768	4.32058e-05	0.0024981	0.016769	26.4828	9.75173	9.24	2.31	0.0970912	0.998014	27.3806
14.878	42.0894	42.0866	41.4268	41.7696	42.4056	42.7262	4.45304e-05	0.0026439	0.017939	25.6906	10.1218	11.59	2.24	0.0953081	0.997691	26.9277
14.888	42.144	42.1394	41.4728	41.8232	42.4576	42.7752	4.65243e-05	0.0029463	0.019367	25.1554	10.4592	8.24	2.15	0.0930936	0.996873	26.4249
14.898	42.1998	42.194	41.522	41.8796	42.5104	42.8242	4.8955e-05	0.0030968	0.021179	24.3323	10.8699	7.64	2.08	0.091543	0.996151	25.9299
14.908	42.2558	42.2498	41.5744	41.939	42.5626	42.8748	5.18024e-05	0.0033616	0.023168	23.8561	11.2371	5.56	2.05	0.0894841	0.995484	25.5451
14.918	42.3134	42.3066	41.6314	42.0014	42.6162	42.9258	5.42297e-05	0.0036188	0.025294	23.4964	11.7192	5.4	2.06	0.0877015	0.995115	25.4934
14.928	42.3714	42.3652	41.691	42.0644	42.671	42.9784	5.4888e-05	0.0038696	0.027015	23.0197	12.3664	6.36	2.05	0.0876549	0.995078	26.1988
14.938	42.4302	42.4242	41.7526	42.129	42.7276	43.0346	5.29047e-05	0.0040698	0.028208	22.8219	13.3966	6.69	2.01	0.0873488	0.995257	27.9484
14.948	42.4892	42.484	41.8138	42.1924	42.7854	43.0932	4.8279e-05	0.0041212	0.028506	22.5973	14.8353	6.72	2.08	0.0884861	0.99576	30.912
14.958	42.549	42.544	41.8732	42.2538	42.8434	43.1538	4.40958e-05	0.0040466	0.02787	22.3959	15.8802	8.3	2.05	0.0895347	0.996028	33.1869
14.968	42.609	42.6048	41.9338	42.3148	42.9038	43.2172	3.68066e-05	0.0038086	0.025923	22.2194	17.696	8.46	2.02	0.0914126	0.996263	37.428
14.978	42.6698	42.6658	41.99	42.3742	42.9664	43.2844	3.01835e-05	0.0034191	0.023021	22.0178	19.1633	7.76	1.96	0.0936395	0.996758	41.1383
14.988	42.7308	42.726	42.0434	42.4316	43.0318	43.3524	2.09461e-05	0.0029188	0.01964	21.8645	23.5589	9.02	1.99	0.0949519	0.996965	50.9784
14.998	42.791	42.7868	42.0956	42.4878	43.0986	43.4252	1.56628e-05	0.0023012	0.015788	21.8768	25.3265	8.3	1.92	0.0966262	0.997556	55.7499
15.008	42.8518	42.8478	42.146	42.5414	43.1664	43.5008	8.59912e-06	0.0017296	0.012034	21.7991	35.1619	12.21	1.95	0.100319	0.996327	80.4663
15.018	42.9184	42.9136	42.1944	42.5992	43.2392	43.5792	4.62156e-06	0.0013716	0.0087259	21.7309	47.4393	11.35	2.01	0.102977	0.995871	111.921
15.028	43.008	43.0054	42.2408	42.6702	43.3532	43.723	2.87104e-06	0.00083087	0.0059438	22.5367	52.0166	10.61	2.41	0.100805	0.993755	125.446
15.038	43.0806	43.0842	42.29	42.7346	43.4508	43.8478	1.99196e-06	0.00060273	0.0039512	22.061	49.8385	8.77	2.91	0.100816	0.994266	118.19
15.048	43.1268	43.131	42.34	42.7878	43.493	43.8878	1.75694e-06	0.00037787	0.0025774	22.6069	36.8588	11.26	3.44	0.0946785	0.994825	86.178
15.058	43.167	43.1694	42.3868	42.8356	43.5238	43.9072	8.96355e-07	0.00024926	0.0016639	25.0722	46.6406	10.81	4.28	0.0867571	0.975919	112.556
15.068	43.2054	43.2066	42.4312	42.8794	43.5564	43.9278	3.52294e-08	0.00018096	0.0013187	22.7456	940.497	10.77	5.15	0.0868586	0.98167	2100.43
15.078	43.2426	43.242	42.4704	42.9184	43.5902	43.9536	-1.10961e-06	0.00015286	0.0010218	26.1998	-23.1373	11.59	5.82	0.0864252	0.983827	-56.1297
15.088	43.278	43.277	42.5044	42.954	43.6234	43.9798	-4.08752e-09	0.00015204	0.0010407	25.5183	-6397.09	11.4	7.02	0.080568	0.98264	-13242.5
15.098	43.3138	43.312	42.5342	42.9882	43.6604	44.0106	-4.45663e-07	0.0001758	0.0011626	25.9404	-65.5451	10.05	7.22	0.0851151	0.982022	-140.384
15.108	43.3506	43.3494	42.5616	43.0214	43.7032	44.0482	3.97502e-06	0.00023594	0.0014305	26.2116	9.04201	10.28	5.46	0.105835	0.996225	22.9261
15.118	43.3876	43.3874	42.5878	43.0536	43.7496	44.096	7.70962e-06	0.00034611	0.001889	25.0843	6.15624	10.04	3.54	0.129605	0.998974	19.2565
15.128	43.4238	43.4254	42.613	43.0824	43.8006	44.1532	1.29968e-05	0.00048139	0.0022237	26.7916	4.29889	11.24	2.49	0.150141	0.999178	17.3689
15.138	43.4582	43.4634	42.6372	43.1088	43.8542	44.2226	1.74133e-05	0.00058233	0.0027311	27.1685	3.94069	11.39	2.37	0.154712	0.997502	16.8761
15.148	43.4834	43.4918	42.6628	43.1324	43.8874	44.2642	1.91723e-05	0.00062948	0.002954	27.0251	3.87127	11.9	2.44	0.162526	0.997655	17.3657
15.158	43.5032	43.5106	42.6864	43.1538	43.9042	44.279	1.54239e-05	0.00065098	0.0031415	26.771	5.11751	13.42	2.6	0.158652	0.999242	22.8794
15.168	43.5214	43.5284	42.7094	43.174	43.9174	44.289	6.82283e-06	0.00067352	0.0032556	26.8646	11.989	13.08	2.63	0.159229	0.9993	54.6503
15.178	43.5402	43.5456	42.7332	43.1924	43.9312	44.2998	5.94705e-06	0.00070804	0.0033701	28.06	14.2383	10.8	2.68	0.153122	0.997625	66.3775
15.188	43.5584	43.5626	42.758	43.2096	43.9452	44.3108	1.03677e-05	0.00075513	0.0037119	26.4182	8.99563	9.7	2.66	0.154384	0.999305	39.7707
15.198	43.5764	43.5796	42.7814	43.2258	43.96	44.3226	1.47678e-05	0.00081113	0.0040194	26.0847	6.83852	11.42	2.44	0.144542	0.999821	28.4653
15.208	43.5944	43.5966	42.8036	43.241	43.9758	44.3346	2.09389e-05	0.00089512	0.00476	24.7498	5.71176	11.45	2.12	0.136133	0.998795	20.726
15.218	43.6124	43.6128	42.8256	43.256	43.9918	44.3466	2.4693e-05	0.0010405	0.0058276	24.4631	5.9297	10.52	1.92	0.127201	0.999629	19.4857
15.228	43.6288	43.6296	42.8484	43.2702	44.0078	44.3602	2.95184e-05	0.0012553	0.0070352	24.1786	5.98826	10.48	1.71	0.125169	0.999477	19.0725
15.238	43.6456	43.6458	42.8714	43.2842	44.0238	44.3742	3.08475e-05	0.0015273	0.0082087	23.9817	6.68608	12.87	1.64	0.129162	0.999687	21.6559
15.248	43.6626	43.6618	42.8944	43.2982	44.0398	44.3882	3.26292e-05	0.0017766	0.0092569	23.7814	7.12815	9.93	1.66	0.132191	0.999471	23.5804
15.258	43.6788	43.6778	42.9174	43.3122	44.0558	44.403	3.30519e-05	0.0019931	0.010089	23.4862	7.66954	9.21	1.72	0.136583	0.999824	26.0028
15.268	43.694	43.6938	42.9412	43.3254	44.0718	44.4172	3.12944e-05	0.002191	0.010847	23.6937	8.70882	15.71	1.75	0.137098	0.999431	30.037
15.278	43.7098	43.709	42.9644	43.3392	44.0878	44.4312	3.21838e-05	0.0023497	0.011562	23.3463	9.02637	9.96	1.84	0.140876	0.999291	31.6619
15.288	43.725	43.7248	42.9874	43.3524	44.1054	44.4468	3.26067e-05	0.0025152	0.012436	23.3928	9.58277	12.1	2.09	0.141297	0.999287	33.806
15.298	43.74	43.7408	43.0112	43.3654	44.1226	44.4636	3.46217e-05	0.0027459	0.01332	23.602	9.66658	13.45	2.48	0.14438	0.998751	35.1918
15.308	43.7558	43.7568	43.0352	43.3784	44.1404	44.483	3.70464e-05	0.0031046	0.014593	23.4253	9.89726	10.52	2.23	0.148063	0.998969	36.4434
15.318	43.7718	43.7736	43.0576	43.3914	44.1584	44.5046	4.03369e-05	0.0033578	0.016052	23.1136	9.9987	10.44	2.08	0.153846	0.999685	37.6702
15.328	43.7878	43.7898	43.0788	43.4044	44.1772	44.5266	4.23195e-05	0.0036778	0.017387	23.0644	10.3229	13.72	1.88	0.159071	0.999584	39.854
15.338	43.8038	43.8066	43.1006	43.4174	44.197	44.5502	4.16813e-05	0.0039568	0.018603	22.9295	11.214	11.72	1.63	0.16288	0.999637	44.0749
15.348	43.8198	43.8236	43.121	43.4304	44.2178	44.575	4.23171e-05	0.0042322	0.019598	22.7766	11.6363	10.89	1.53	0.16606	0.999697	46.128
15.358	43.8358	43.8406	43.141	43.4434	44.238	44.604	4.05525e-05	0.0044113	0.020212	22.4299	12.523	12.87	1.39	0.170106	0.999803	49.9574
15.368	43.851	43.8584	43.1594	43.4564	44.2588	44.6324	3.83558e-05	0.0045054	0.020406	22.1989	13.3673	14.47	1.29	0.172706	0.999848	53.5721
15.378	43.8668	43.8756	43.1774	43.4686	44.2798	44.6636	3.63629e-05	0.0045191	0.020355	21.8961	14.0647	12.05	1.25	0.174338	0.999883	56.0929
15.388	43.882	43.8926	43.1946	43.4806	44.3016	44.6956	3.46147e-05	0.0044677	0.020147	21.6031	14.624	10.78	1.29	0.174081	0.999897	57.4843
15.398	43.9002	43.912	43.2084	43.4966	44.3252	44.7308	3.39376e-05	0.0043779	0.019981	21.3619	14.7929	11.89	1.46	0.171019	0.999897	56.4683
15.408	43.9296	43.9416	43.2246	43.5272	44.3548	44.7612	3.32811e-05	0.0042879	0.020048	21.1486	15.1353	10.15	1.6	0.165114	0.999898	55.1544
15.418	43.972	43.9816	43.2432	43.5708	44.3922	44.7926	3.48444e-05	0.0042576	0.020379	20.9522	14.6949	10.24	1.82	0.159084	0.999896	51.0613
15.428	44.0178	44.0236	43.2558	43.6128	44.4344	44.8318	3.68175e-05	0.0043324	0.021101	20.7167	14.4001	10.51	1.98	0.154812	0.999899	48.1375
15.438	44.0646	44.0656	43.266	43.6482	44.4814	44.8768	3.81267e-05	0.0045267	0.022276	20.5435	14.6799	11.56	2.07	0.153271	0.999911	48.2601
15.448	44.11	44.1068	43.2768	43.6774	44.5334	44.9268	4.01108e-05	0.0049235	0.023768	20.695	14.8884	12.37	1.6	0.158877	0.998907	51.9412
15.458	44.1534	44.1462	43.2878	43.7014	44.5848	44.9802	4.25688e-05	0.0053273	0.025514	20.5138	15.0593	15.42	1.85	0.156163	0.999823	51.2136
15.468	44.1924	44.1828	43.2996	43.722	44.6358	45.0334	4.5402e-05	0.0056428	0.027255	20.411	15.083	9.23	1.75	0.158953	0.99986	52.1122
15.478	44.2312	44.2196	43.3108	43.7412	44.6876	45.0872	4.85045e-05	0.0060535	0.028612	20.4397	14.8212	7.15	1.56	0.161582	0.999798	52.1725
15.488	44.2702	44.2582	43.3226	43.7602	44.7428	45.1484	4.96205e-05	0.0062123	0.029437	20.4222	14.9056	5.08	1.4	0.166206	0.999858	53.7641
15.498	44.3108	44.2988	43.333	43.7784	44.8044	45.2202	5.2041e-05	0.0062626	0.02911	20.5525	14.0545	5.77	1.26	0.174067	0.999735	53.5348
15.508	44.3518	44.3406	43.3438	43.7948	44.8722	45.3014	5.04797e-05	0.0061781	0.027542	20.8743	13.7087	5.51	1.21	0.18612	0.999364	57.0466
15.518	44.392	44.3826	43.3548	43.81	44.9428	45.3956	4.67531e-05	0.0059574	0.025162	21.0987	13.5223	7	1.46	0.201765	0.99874	61.6986
15.528	44.4288	44.4246	43.365	43.825	45.0146	45.4958	4.27767e-05	0.0055534	0.022341	21.5796	13.1224	7.71	1.19	0.219271	0.99862	66.6929
15.538	44.4616	44.4618	43.3814	43.8424	45.0722	45.5744	4.12339e-05	0.0050033	0.01913	22.1059	11.6567	6.81	1.08	0.23595	0.998332	64.9853
15.548	44.4888	44.4906	43.4074	43.8668	45.107	45.6146	3.85714e-05	0.0042106	0.015723	23.0054	10.2421	6.99	1.17	0.25513	0.997916	63.7804
15.558	44.514	44.516	43.437	43.8944	45.1306	45.6346	3.55072e-05	0.0037563	0.01308	23.907	9.25568	10.25	1.17	0.26936	0.997687	62.6098
15.568	44.539	44.541	43.4662	43.9232	45.1518	45.6532	3.23903e-05	0.0030627	0.011077	24.3845	8.5926	7.76	3.36	0.267521	0.994344	58.5793
15.578	44.564	44.5652	43.4952	43.9506	45.1736	45.6722	3.15183e-05	0.0028063	0.0096186	25.2296	7.6677	6.89	1.61	0.279037	0.998569	55.777
15.588	44.5882	44.59	43.5234	43.9784	45.194	45.692	2.82305e-05	0.002444	0.0087172	25.679	7.75846	6.5	1.63	0.264645	0.998857	53.5697
15.598	44.6138	44.615	43.5522	44.0064	45.2156	45.7104	2.68999e-05	0.0021237	0.0078413	25.8526	7.32411	7.01	1.91	0.244063	0.99976	47.2791
15.608	44.6382	44.6392	43.5804	44.0336	45.2376	45.73	2.38156e-05	0.0018063	0.007266	26.1105	7.66567	6.54	1.73	0.224594	0.999807	44.5254
15.618	44.663	44.664	43.6084	44.0614	45.2596	45.75	2.38099e-05	0.0016278	0.0068575	25.6386	7.23644	6.84	1.45	0.211452	0.999631	39.9397
15.628	44.688	44.6882	43.6364	44.0886	45.2824	45.7692	2.16112e-05	0.0015388	0.006468	26.4752	7.51984	6.14	1.66	0.20089	0.999164	40.1876
15.638	44.713	44.713	43.6636	44.1164	45.3046	45.7898	2.20568e-05	0.0015021	0.0064261	26.4357	7.32017	7.15	1.41	0.195543	0.999626	38.5835
15.648	44.7372	44.738	43.6914	44.1436	45.3266	45.8092	2.40222e-05	0.0015062	0.0065467	26.5411	6.84741	11.03	1.39	0.190023	0.999548	35.6404
15.658	44.762	44.7622	43.7178	44.1706	45.3494	45.829	2.6037e-05	0.0015557	0.0068506	26.4679	6.6108	9.69	1.4	0.186591	0.99952	33.954
15.668	44.787	44.787	43.7438	44.1976	45.3716	45.8498	2.95361e-05	0.0016541	0.007462	26.0693	6.34773	9.26	1.29	0.184279	0.999536	31.7259
15.678	44.8112	44.812	43.7698	44.2246	45.3944	45.8716	3.35165e-05	0.0017936	0.0082343	25.9975	6.17284	10.92	1.29	0.17895	0.999873	30.1433
15.69	44.841	44.841	43.801	44.256	45.422	45.896	3.06658e-05	0.0015244	0.0088211	31.578	7.22746	2.61	3.62	0.161804	0.999466	36.7315
15.7	44.866	44.866	43.826	44.282	45.445	45.917	3.24119e-05	0.0015721	0.0090523	30.842	7.01733	2.97	3.29	0.168027	0.999649	36.0022
15.71	44.89	44.891	43.851	44.308	45.468	45.94	3.5492e-05	0.0015714	0.0092158	29.7409	6.52407	6.06	3.05	0.168569	0.999485	32.7876
15.72	44.915	44.915	43.875	44.334	45.492	45.962	3.81535e-05	0.0015524	0.0094443	28.5814	6.21946	7.32	2.76	0.165885	0.999416	29.5674
15.73	44.94	44.94	43.899	44.36	45.515	45.984	4.18939e-05	0.0015558	0.0096209	28.0092	5.77008	7.98	2.38	0.159667	0.999726	26.1112
15.74	44.965	44.965	43.924	44.386	45.538	46.007	4.54152e-05	0.0015943	0.010121	27.2856	5.59937	6.67	1.93	0.154943	0.99974	24.0757
15.75	44.99	44.989	43.948	44.412	45.562	46.031	5.00541e-05	0.0017673	0.010636	26.9508	5.33895	5.99	1.51	0.153201	0.999224	22.5037
15.76	45.014	45.014	43.971	44.438	45.586	46.055	5.51199e-05	0.0017589	0.011244	27.0458	5.12542	6.63	1.28	0.150214	0.998764	21.4696
15.77	45.039	45.039	43.994	44.464	45.61	46.08	5.55599e-05	0.0018939	0.012022	26.9045	5.43666	6.58	1.24	0.150258	0.998269	22.797
15.78	45.064	45.063	44.017	44.488	45.633	46.105	5.75346e-05	0.0020842	0.012836	27.2315	5.60554	8.59	1.22	0.150803	0.997054	24.0759
15.79	45.089	45.088	44.04	44.513	45.658	46.131	5.95093e-05	0.0023033	0.013763	27.0685	5.81093	8.05	1.17	0.156508	0.998084	25.6599
15.8	45.113	45.112	44.063	44.539	45.682	46.158	5.77763e-05	0.0026157	0.01446	27.3519	6.28834	7.86	1.38	0.170996	0.994194	30.7271
15.81	45.138	45.137	44.085	44.565	45.706	46.184	5.37996e-05	0.0027071	0.015061	27.2129	7.03382	7.34	1.18	0.169539	0.999205	33.4612
15.82	45.163	45.162	44.108	44.589	45.73	46.211	5.02527e-05	0.0028503	0.015329	27.3426	7.66428	6.48	1.18	0.173812	0.99965	37.6238
15.83	45.188	45.186	44.13	44.612	45.755	46.239	4.67515e-05	0.0029513	0.015371	27.621	8.26083	7.01	1.3	0.179141	0.999669	41.7014
15.84	45.212	45.211	44.151	44.638	45.781	46.266	4.32148e-05	0.0029944	0.015082	27.6582	8.76887	6.93	1.3	0.185024	0.999915	45.5307
15.85	45.236	45.236	44.173	44.662	45.805	46.293	4.01183e-05	0.0029629	0.014575	27.721	9.12816	6.77	1.29	0.189324	0.999964	48.1651
15.86	45.26	45.26	44.195	44.686	45.83	46.321	3.68181e-05	0.002873	0.01364	28.0714	9.3083	6.12	1.27	0.192882	0.999852	50.1574
15.87	45.285	45.285	44.215	44.711	45.855	46.352	3.72694e-05	0.0027426	0.012839	27.9096	8.65557	7.26	1.28	0.19483	0.999674	46.6978
15.88	45.311	45.31	44.236	44.735	45.879	46.383	3.46121e-05	0.0025888	0.011963	28.0542	8.68418	7.31	1.31	0.193552	0.999526	47.0066
15.89	45.335	45.334	44.257	44.759	45.904	46.414	3.3752e-05	0.0024178	0.011017	28.4111	8.20127	8.42	1.45	0.194029	0.999214	44.6789
15.9	45.359	45.359	44.278	44.783	45.929	46.444	3.15567e-05	0.0022461	0.010288	27.9052	8.19138	8.55	1.43	0.194636	0.999097	43.8766
15.91	45.383	45.383	44.299	44.806	45.954	46.476	2.75532e-05	0.0021057	0.0096562	27.6115	8.80544	9.27	1.22	0.191814	0.998789	45.9801
15.92	45.408	45.408	44.32	44.829	45.979	46.507	2.40384e-05	0.0020149	0.0092994	27.06	9.71999	10.66	1.04	0.186708	0.998845	48.9508
15.93	45.432	45.432	44.341	44.853	46.004	46.538	2.35991e-05	0.0019991	0.0094008	26.225	10.0089	9.78	1.02	0.182981	0.999064	48.1417
15.94	45.456	45.457	44.361	44.876	46.029	46.571	2.62324e-05	0.0020582	0.0097898	25.3102	9.37676	13.17	1.07	0.181376	0.999681	43.6064
15.95	45.48	45.481	44.381	44.9	46.054	46.603	2.84609e-05	0.0022216	0.010623	24.3812	9.37811	10.89	1.12	0.18142	0.999428	42.3528
15.96	45.504	45.506	44.401	44.924	46.08	46.637	3.35288e-05	0.0024837	0.011908	23.7007	8.92356	7.29	1.12	0.183246	0.998074	39.9836
15.97	45.528	45.53	44.422	44.946	46.105	46.671	3.77068e-05	0.0029024	0.013526	23.5251	9.01295	9.57	1.03	0.186551	0.997019	41.5708
15.98	45.553	45.555	44.443	44.969	46.131	46.704	4.2984e-05	0.0034542	0.015229	23.2185	8.90188	11.01	1.02	0.197543	0.995412	43.0602
15.99	45.577	45.579	44.462	44.992	46.157	46.739	4.53988e-05	0.0038009	0.01678	23.3101	9.28677	10.93	1.35	0.212952	0.995988	47.8449
16	45.6	45.604	44.482	45.014	46.184	46.774	4.80657e-05	0.0043458	0.018442	23.2075	9.64028	7.93	1.18	0.226868	0.996155	54.0115
16.01	45.624	45.628	44.501	45.036	46.209	46.809	4.9826e-05	0.0046886	0.020034	23.579	10.1025	6.91	1.95	0.227201	0.997879	57.0746
16.02	45.647	45.652	44.521	45.059	46.236	46.843	5.33543e-05	0.0053362	0.02164	23.9819	10.1907	6.36	2.63	0.24626	0.995823	63.6144
16.03	45.671	45.677	44.54	45.081	46.263	46.877	5.35635e-05	0.0061267	0.023871	24.7557	11.1974	7.14	1.7	0.242366	0.995632	72.3646
16.04	45.695	45.701	44.56	45.103	46.289	46.913	6.23885e-05	0.0071264	0.026763	25.6194	10.7782	6.66	1.86	0.268166	0.993308	77.7916
16.05	45.718	45.725	44.579	45.124	46.316	46.947	7.23078e-05	0.0084255	0.030215	26.833	10.4992	7.68	1.11	0.287787	0.993629	83.6742
16.06	45.741	45.749	44.598	45.146	46.342	46.982	8.79696e-05	0.009705	0.034283	27.8514	9.79181	7.61	1.66	0.301849	0.995213	84.42
16.07	45.765	45.773	44.618	45.168	46.369	47.013	0.000101616	0.011099	0.038384	28.7939	9.49085	6.95	1.73	0.316046	0.997473	85.5003
16.08	45.789	45.798	44.636	45.19	46.395	47.045	0.000116834	0.012052	0.041801	29.5884	8.98951	7.73	1.72	0.33129	0.998165	85.543
16.09	45.812	45.822	44.655	45.212	46.421	47.077	0.000123462	0.012588	0.044107	29.859	8.97616	7.08	1.72	0.337108	0.998379	85.6619
16.1	45.835	45.845	44.673	45.233	46.447	47.11	0.000121042	0.012626	0.044892	29.9923	9.31858	6.785	1.94	0.344369	0.998042	90.6876
16.11	45.859	45.869	44.692	45.255	46.474	47.144	0.000108036	0.012465	0.044595	29.8	10.3713	6.62	1.74	0.34566	0.996442	99.9389
16.12	45.882	45.893	44.709	45.277	46.501	47.174	8.75085e-05	0.01215	0.043189	29.3952	12.4005	7.22	1.66	0.352085	0.994707	119.771
16.13	45.905	45.917	44.726	45.299	46.527	47.205	7.84712e-05	0.01172	0.041515	28.4889	13.2926	7.4	1.7	0.352058	0.989864	124.755
16.14	45.928	45.94	44.745	45.319	46.554	47.234	7.58361e-05	0.011104	0.039678	27.6212	13.1459	6.98	1.7	0.353849	0.990226	123.449
16.15	45.95	45.964	44.763	45.34	46.58	47.264	8.08995e-05	0.0107	0.038495	26.5591	11.9557	7.67	1.4	0.345087	0.99067	106.504
16.16	45.973	45.987	44.78	45.361	46.606	47.295	8.57776e-05	0.010703	0.038129	25.6972	11.1686	8.04	1.41	0.335843	0.991022	95.5168
16.17	45.996	46.011	44.798	45.381	46.633	47.326	9.03784e-05	0.010863	0.038476	24.9435	10.6965	7.49	1.14	0.331342	0.995708	90.0093
16.18	46.019	46.034	44.816	45.402	46.659	47.353	9.23597e-05	0.011176	0.039378	24.4631	10.7124	6.45	1.21	0.33127	0.996522	88.8981
16.19	46.042	46.057	44.834	45.422	46.684	47.381	9.50202e-05	0.011583	0.040567	24.0156	10.7269	7.78	1.24	0.332397	0.997039	88.1276
16.2	46.066	46.08	44.852	45.443	46.71	47.408	9.76773e-05	0.012129	0.041888	23.6436	10.7749	7.06	1.55	0.334345	0.997623	88.0685
16.21	46.089	46.103	44.87	45.464	46.736	47.435	0.000100971	0.012668	0.043609	23.3938	10.8517	7.46	1.37	0.331248	0.998215	87.6163
16.22	46.111	46.126	44.888	45.484	46.762	47.46	0.00011132	0.013987	0.046012	23.3552	10.3852	6.51	1.37	0.334254	0.99941	85.9397
16.23	46.134	46.149	44.906	45.504	46.788	47.485	0.000118168	0.016089	0.049541	23.4532	10.5337	7.67	1.49	0.348769	0.999069	93.553
16.24	46.157	46.171	44.923	45.525	46.813	47.511	0.000121922	0.01926	0.054433	23.8371	11.2175	8.28	1.62	0.375017	0.996972	111.727
16.25	46.179	46.194	44.94	45.545	46.838	47.536	0.000138456	0.023463	0.060686	24.5371	11.0127	7.52	1.21	0.404791	0.997141	123.44
16.26	46.201	46.216	44.958	45.565	46.863	47.56	0.000183868	0.028301	0.067125	25.2608	9.17266	7.08	1.26	0.444191	0.997244	117.313
16.27	46.224	46.239	44.975	45.585	46.888	47.586	0.000219572	0.032434	0.073236	25.9633	8.3804	8.21	1	0.478889	0.997148	117.219
16.28	46.246	46.261	44.993	45.605	46.913	47.609	0.000239633	0.035302	0.078088	26.6027	8.18755	8.39	0.86	0.502702	0.996268	120.872
16.29	46.268	46.283	45.011	45.625	46.937	47.632	0.000265828	0.036066	0.080183	26.8789	7.57877	7.4	0.99	0.5227	0.993027	114.567
16.3	46.291	46.304	45.029	45.645	46.961	47.655	0.000235443	0.035446	0.079101	26.9998	8.44137	6.64	0.81	0.52987	0.988167	128.872
16.31	46.313	46.326	45.046	45.665	46.984	47.678	0.000164243	0.033292	0.076439	26.8062	11.6935	6.82	0.63	0.532334	0.982798	176.184
16.32	46.335	46.348	45.063	45.684	47.008	47.7	0.000124103	0.030157	0.07225	26.47	14.6275	6.77	0.63	0.52338	0.975396	211.662
16.33	46.357	46.369	45.08	45.704	47.032	47.72	0.00010492	0.026072	0.066659	25.8552	15.9631	6.82	1.25	0.511815	0.966255	217.547
16.34	46.379	46.391	45.098	45.724	47.055	47.743	9.98586e-05	0.021729	0.061375	25.1149	15.4427	7.28	1.28	0.473645	0.955199	186.434
16.35	46.401	46.412	45.113	45.744	47.078	47.763	0.000106486	0.018029	0.057335	24.4687	13.5283	7.07	1.3	0.414925	0.953335	138.591
16.36	46.422	46.433	45.131	45.764	47.101	47.784	0.000117283	0.015741	0.054331	23.9743	11.6394	6.91	2.5	0.365433	0.96952	104.031
16.37	46.444	46.454	45.149	45.784	47.124	47.803	0.000115713	0.014512	0.05233	23.5074	11.3628	6.85	3.24	0.335419	0.983781	92.6261
16.38	46.465	46.475	45.166	45.805	47.146	47.824	0.000104272	0.013968	0.051162	23.2475	12.3281	7	1.94	0.317918	0.991123	95.3762
16.39	46.487	46.496	45.183	45.825	47.169	47.844	0.000101845	0.013308	0.050246	22.8944	12.3959	6.67	2.46	0.316216	0.992781	93.1446
16.4	46.509	46.517	45.2	45.845	47.191	47.863	0.000102944	0.012796	0.048661	22.6678	11.8767	7.29	1.5	0.306309	0.991237	85.5911
16.41	46.531	46.538	45.217	45.864	47.213	47.883	9.78704e-05	0.011813	0.046882	22.4165	12.0357	7.67	1.2	0.30117	0.990603	83.7506
16.42	46.552	46.559	45.235	45.885	47.235	47.902	9.45539e-05	0.010923	0.045034	22.2946	11.9668	8.21	1.38	0.287275	0.991765	78.2051
16.43	46.574	46.58	45.254	45.904	47.257	47.921	8.90622e-05	0.010109	0.043019	22.2772	12.1362	6.54	1.04	0.279248	0.991586	76.2445
16.44	46.595	46.6	45.271	45.924	47.28	47.94	8.26682e-05	0.0094066	0.0408	22.2515	12.4005	7.22	1.24	0.269079	0.992858	74.5789
16.45	46.616	46.621	45.289	45.944	47.3	47.959	7.53859e-05	0.0086446	0.038825	22.1755	12.9401	5.82	0.58	0.266961	0.993282	76.3976
16.46	46.638	46.642	45.306	45.965	47.321	47.977	6.67806e-05	0.0082081	0.036973	22.0181	13.9108	5.89	0.9	0.252574	0.993545	77.5359
16.47	46.659	46.662	45.324	45.985	47.343	47.994	6.28151e-05	0.0076849	0.035595	21.7692	14.2378	5.83	1.26	0.251648	0.994712	77.5912
16.48	46.681	46.683	45.341	46.006	47.365	48.011	6.52596e-05	0.0075722	0.034421	21.4984	13.2524	6.19	1.12	0.248104	0.996494	71.4852
16.49	46.703	46.704	45.36	46.027	47.386	48.029	6.56995e-05	0.0074095	0.033428	21.0242	12.7839	5.77	0.85	0.245196	0.995862	66.5697
16.5	46.724	46.724	45.378	46.048	47.407	48.047	6.4146e-05	0.0073009	0.032756	20.7191	12.8303	6.1	1.08	0.246931	0.997392	67.1499
16.51	46.746	46.745	45.396	46.069	47.429	48.064	6.30675e-05	0.0072348	0.032204	20.5775	12.8298	5.8	1.27	0.244309	0.997845	66.5192
16.52	46.767	46.766	45.415	46.09	47.449	48.081	6.04085e-05	0.0071811	0.03157	20.3834	13.1309	5.82	1.29	0.247452	0.998796	68.5036
16.53	46.789	46.787	45.434	46.11	47.47	48.098	5.77682e-05	0.0070782	0.030802	20.3264	13.397	5.81	1.51	0.251643	0.998982	71.0044
16.54	46.81	46.808	45.453	46.132	47.49	48.115	5.55709e-05	0.0070405	0.029876	20.5241	13.508	6.55	1.71	0.255833	0.999328	73.5332
16.55	46.832	46.829	45.471	46.153	47.511	48.131	5.62147e-05	0.0069814	0.029069	20.5113	12.9926	6.34	1.98	0.262511	0.999621	72.7443
16.56	46.854	46.85	45.491	46.176	47.531	48.149	5.75429e-05	0.0068539	0.027916	20.662	12.1893	6.41	1.97	0.271078	0.999576	70.8549
16.57	46.876	46.871	45.51	46.198	47.552	48.165	5.75619e-05	0.0064264	0.026353	20.8976	11.503	7.86	2.05	0.275202	0.999096	68.8998
16.58	46.898	46.892	45.53	46.22	47.572	48.183	5.46854e-05	0.0060577	0.02432	21.1208	11.174	9.3	1.9	0.281832	0.998782	68.8538
16.59	46.92	46.913	45.551	46.241	47.592	48.2	4.6067e-05	0.0054206	0.021521	21.4063	11.7379	9.24	2.44	0.295477	0.999465	76.6861
16.6	46.942	46.935	45.571	46.263	47.613	48.217	3.26461e-05	0.0047811	0.018754	21.8389	14.4337	9.05	2.59	0.301379	0.996957	96.8629
16.61	46.965	46.956	45.593	46.286	47.634	48.234	2.46933e-05	0.0041205	0.015755	22.6558	16.0308	9.07	2.86	0.323138	0.997379	120.66
16.62	46.987	46.978	45.613	46.309	47.655	48.251	2.73469e-05	0.003302	0.012663	23.3437	11.6344	10.58	3.55	0.347868	0.993657	93.6558
16.63	47.01	47	45.636	46.332	47.676	48.267	2.97568e-05	0.0024519	0.0093266	24.649	7.87505	15.92	4.87	0.354038	0.980663	65.3799
16.64	47.032	47.021	45.66	46.355	47.696	48.284	2.33522e-05	0.0017173	0.0068746	25.7452	7.39666	13.21	5.63	0.343303	0.961642	61.0177
16.65	47.055	47.043	45.681	46.378	47.717	48.302	1.56465e-05	0.0013469	0.0052911	27.077	8.49662	13.38	5.6	0.360924	0.971239	73.5373
16.66	47.078	47.065	45.705	46.402	47.737	48.32	1.38837e-05	0.00097121	0.0040521	28.92	7.33317	11	5.49	0.353066	0.984424	66.537
16.67	47.1	47.088	45.729	46.426	47.758	48.337	1.43453e-05	0.00086138	0.0030646	29.4098	5.36761	16.31	6.26	0.312065	0.943023	43.9502
16.68	47.123	47.11	45.755	46.45	47.779	48.354	1.74462e-05	0.0006744	0.0025593	29.6354	3.68585	17.64	3.44	0.30963	0.968157	34.1587
16.69	47.146	47.132	45.778	46.474	47.8	48.372	2.14092e-05	0.00057351	0.0026229	26.8803	3.0782	18.54	4.01	0.236925	0.973071	23.942
16.7	47.169	47.155	45.802	46.498	47.821	48.39	2.40393e-05	0.00066427	0.0033849	23.731	3.53786	10.82	5.27	0.169998	0.992832	21.4212
16.71	47.192	47.177	45.826	46.523	47.841	48.408	2.44914e-05	0.00099443	0.0050634	21.4204	5.19451	9.73	3.74	0.152189	0.995047	25.4403
16.72	47.215	47.2	45.852	46.548	47.862	48.425	2.49132e-05	0.0017398	0.0081807	19.6478	8.25045	14.97	1.8	0.154044	0.992072	34.1016
16.73	47.238	47.223	45.878	46.572	47.883	48.442	2.36013e-05	0.0027058	0.012895	18.8802	13.7279	8.76	1.26	0.158393	0.989313	51.2515
16.74	47.262	47.246	45.907	46.597	47.904	48.459	2.42396e-05	0.004134	0.019034	18.7538	19.7297	11.01	1.24	0.178984	0.986176	76.9318
16.75	47.285	47.269	45.935	46.623	47.925	48.477	3.34938e-05	0.005736	0.026473	18.5312	19.8589	12.13	1.13	0.193293	0.990756	76.4141
16.76	47.309	47.292	45.96	46.648	47.947	48.494	4.67353e-05	0.0075088	0.034554	18.5766	18.5768	12.43	0.97	0.19428	0.993684	71.2118
16.77	47.332	47.315	45.988	46.673	47.968	48.512	6.08323e-05	0.0093728	0.043034	18.4936	17.7744	13.13	0.68	0.204098	0.995986	68.6822
16.78	47.355	47.339	46.018	46.698	47.99	48.53	7.1428e-05	0.011179	0.050846	18.5107	17.8857	7.07	0.76	0.210122	0.996519	70.8504
16.79	47.379	47.362	46.045	46.724	48.011	48.548	7.78329e-05	0.012737	0.057436	18.5108	18.5412	5.78	0.65	0.218097	0.998022	75.4963
16.8	47.402	47.386	46.074	46.749	48.033	48.567	7.7818e-05	0.015811	0.065139	18.5335	21.0319	5.23	1.37	0.206865	0.999903	81.5686
16.81	47.425	47.409	46.104	46.774	48.055	48.585	7.91137e-05	0.016934	0.067351	18.5028	21.3899	3.81	1.23	0.215911	0.99993	86.3605
16.82	47.448	47.433	46.133	46.8	48.076	48.604	7.64817e-05	0.017595	0.067988	18.5277	22.3353	3.04	1.11	0.224392	0.999908	94.0016
16.83	47.472	47.456	46.162	46.825	48.097	48.624	7.22987e-05	0.017861	0.067382	18.4786	23.417	2.6	1.1	0.231786	0.999983	100.862
16.84	47.496	47.48	46.192	46.85	48.12	48.642	6.67875e-05	0.017822	0.06525	18.4384	24.5472	2.58	1.07	0.240307	0.999979	109.124
16.85	47.52	47.504	46.222	46.875	48.143	48.661	6.10453e-05	0.017411	0.062171	18.4001	25.5889	2.22	1.03	0.247803	0.99996	116.754
16.86	47.544	47.528	46.254	46.9	48.165	48.68	5.81938e-05	0.01665	0.057707	18.3578	24.9154	1.48	0.99	0.255526	0.999915	117.031
16.87	47.569	47.552	46.286	46.926	48.187	48.698	5.33261e-05	0.015348	0.052152	18.2741	24.5724	3.57	0.95	0.265697	0.999955	118.589
16.88	47.593	47.576	46.318	46.95	48.21	48.718	4.473e-05	0.013686	0.045908	18.1612	25.7873	4.33	1.09	0.268658	0.999854	125.164
16.89	47.617	47.6	46.348	46.975	48.232	48.738	3.65746e-05	0.012162	0.039639	18.1479	27.2308	4.05	1.09	0.270342	0.999479	131.561
16.9	47.642	47.624	46.381	47	48.254	48.757	2.66657e-05	0.010346	0.034095	17.9023	32.1259	4.09	1.58	0.277677	0.999737	158.522
16.91	47.666	47.648	46.413	47.025	48.276	48.777	2.1583e-05	0.0089436	0.028856	17.7677	33.5924	4.42	1.69	0.270207	0.999614	157.842
16.92	47.691	47.672	46.443	47.05	48.3	48.796	1.78158e-05	0.0074725	0.024356	17.598	34.3492	7.3	2.27	0.257398	0.999307	152.791
16.93	47.715	47.697	46.475	47.075	48.323	48.816	1.80385e-05	0.0060263	0.021225	17.3765	29.564	6.58	1.15	0.255402	0.999916	127.837
16.94	47.739	47.721	46.505	47.099	48.346	48.835	1.80616e-05	0.005148	0.01906	17.0751	26.5145	7.13	2.43	0.216485	0.998407	94.7478
16.95	47.763	47.745	46.538	47.124	48.369	48.856	1.89213e-05	0.0044351	0.017418	17.1595	23.1294	6.8	2.03	0.204926	0.999521	78.668
16.96	47.787	47.769	46.569	47.148	48.392	48.876	1.91737e-05	0.0039085	0.016255	17.0437	21.3009	7.16	1.73	0.184258	0.999421	65.4125
16.97	47.812	47.794	46.602	47.173	48.416	48.896	1.56335e-05	0.0036568	0.015338	16.8945	24.6508	7.35	1.79	0.17924	0.999293	72.8437
16.98	47.837	47.818	46.634	47.197	48.439	48.915	1.45226e-05	0.0034812	0.014327	17.0246	24.7872	7.3	1.89	0.174324	0.99896	72.8932
16.99	47.861	47.842	46.666	47.223	48.463	48.935	1.62839e-05	0.0032742	0.013535	16.8895	20.8842	7.53	2.04	0.17434	0.998792	60.4758
17	47.884	47.867	46.697	47.247	48.486	48.956	1.32172e-05	0.0030635	0.01272	17.0508	24.1804	7.17	2.21	0.166911	0.998554	69.0901
17.01	47.908	47.891	46.728	47.272	48.509	48.978	1.36669e-05	0.0027895	0.012403	17.0441	22.8021	6.9	2.42	0.16092	0.998338	62.6552
17.02	47.933	47.916	46.758	47.296	48.534	48.999	1.23291e-05	0.0027151	0.012196	16.9752	24.8544	7.14	2.6	0.156715	0.997671	66.0032
17.03	47.957	47.94	46.788	47.321	48.558	49.02	1.27855e-05	0.0026157	0.011987	17.2208	23.5564	6.93	2.75	0.151193	0.997539	61.9763
17.04	47.981	47.965	46.817	47.345	48.582	49.042	1.43146e-05	0.0025684	0.011846	17.3266	20.7926	7.96	2.75	0.150417	0.996929	54.8755
17.05	48.006	47.989	46.846	47.369	48.606	49.063	1.10051e-05	0.002513	0.011453	17.4298	26.1483	8.05	2.7	0.152068	0.9963	70.671
17.06	48.03	48.014	46.874	47.394	48.63	49.085	1.43092e-05	0.0024271	0.010926	17.6404	19.1851	9.18	2.89	0.155133	0.995729	53.1896
17.07	48.055	48.038	46.902	47.417	48.655	49.107	1.21118e-05	0.0023076	0.010239	17.6718	21.2406	8.84	3.22	0.159296	0.995643	60.4799
17.08	48.079	48.063	46.93	47.441	48.68	49.13	1.27502e-05	0.0021643	0.0094154	17.8025	18.554	7.97	3.48	0.164906	0.997046	54.5011
17.09	48.104	48.087	46.959	47.465	48.705	49.152	9.91453e-06	0.0020058	0.0083776	17.8988	21.2307	8.62	3.66	0.174384	0.995941	66.5065
17.1	48.129	48.112	46.986	47.489	48.729	49.175	9.47978e-06	0.0018467	0.0074633	18.1426	19.7811	10.44	3.76	0.184055	0.997376	66.4815
17.11	48.154	48.136	47.012	47.513	48.755	49.198	7.02995e-06	0.0016875	0.0064331	18.3656	22.9924	11.55	3.75	0.199134	0.997061	86.0305
17.12	48.179	48.161	47.037	47.536	48.781	49.22	9.46492e-06	0.0015107	0.0054446	18.9501	14.4533	16.58	3.55	0.212625	0.998522	60.7887
17.13	48.204	48.185	47.062	47.559	48.806	49.243	1.23332e-05	0.0013203	0.0045727	18.7931	9.31566	14.21	3.13	0.22869	0.998121	43.6091
17.14	48.229	48.21	47.087	47.582	48.831	49.266	9.68359e-06	0.0011354	0.0037466	18.8163	9.72116	13.1	2.84	0.245924	0.997209	50.5319
17.15	48.253	48.235	47.111	47.606	48.857	49.29	5.95826e-06	0.00096032	0.0028825	20.3289	12.1553	11.32	2.88	0.260986	0.999234	73.1002
17.16	48.277	48.259	47.135	47.629	48.883	49.315	1.09368e-06	0.0007904	0.002217	19.6306	50.9324	12.62	3.18	0.299948	0.994648	346.556
17.17	48.302	48.284	47.158	47.652	48.909	49.34	-2.00274e-06	0.00063182	0.0015582	21.008	-19.5486	15.23	3.67	0.338253	0.996652	-158.178
17.18	48.326	48.308	47.182	47.674	48.934	49.365	-2.87049e-06	0.00045936	0.0010453	19.9974	-9.14958	6.42	4.59	0.381993	0.983791	-84.421
17.19	48.351	48.333	47.204	47.697	48.961	49.39	-1.56006e-06	0.00029675	0.00080377	23.592	-12.9451	12.03	6.68	0.303438	0.990582	-106.489
17.2	48.376	48.357	47.225	47.719	48.987	49.416	6.48143e-07	0.00017286	0.0007038	24.8494	27.2832	17.91	10.48	0.212568	0.984026	154.796
17.21	48.401	48.382	47.246	47.742	49.012	49.442	4.18729e-06	0.00010374	0.00081858	24.0584	4.91185	15.7	15.71	0.137491	0.964042	15.6416
17.22	48.425	48.407	47.266	47.765	49.038	49.469	2.84437e-06	0.00010192	0.0011837	22.3036	10.4562	14.7	11.53	0.0926709	0.978061	19.0172
17.23	48.449	48.431	47.288	47.787	49.065	49.496	1.52431e-06	0.0001682	0.0019275	19.8548	31.7715	8.91	8.11	0.0828122	0.985831	50.5094
17.24	48.474	48.456	47.31	47.81	49.091	49.524	1.11523e-06	0.00030736	0.0028576	20.2437	64.3803	7.82	5.03	0.0828087	0.994322	110.945
17.25	48.498	48.48	47.331	47.832	49.118	49.551	4.17524e-06	0.00050886	0.0040831	19.3552	24.5711	5.91	3.25	0.0905388	0.996845	45.4321
17.26	48.523	48.505	47.352	47.853	49.145	49.579	1.03261e-05	0.00075235	0.0053743	19.2811	13.0768	12.62	2.3	0.0982978	0.996901	26.154
17.27	48.548	48.53	47.373	47.875	49.171	49.608	1.27637e-05	0.0010219	0.0068196	18.8264	13.4245	12.85	1.85	0.10884	0.998329	28.208
17.28	48.573	48.554	47.395	47.898	49.198	49.636	1.6087e-05	0.001291	0.0080261	19.0848	12.5356	10.01	1.61	0.112892	0.99793	27.639
17.29	48.597	48.579	47.416	47.919	49.225	49.665	1.56241e-05	0.0015286	0.0091884	19.1469	14.7761	8.53	1.44	0.117377	0.998264	33.7279
17.3	48.622	48.603	47.436	47.942	49.251	49.695	1.58628e-05	0.0017727	0.010282	19.4427	16.286	6.85	1.33	0.121502	0.997939	38.8015
17.31	48.646	48.628	47.456	47.964	49.278	49.725	1.4755e-05	0.0020829	0.011844	19.416	20.1687	7.67	1.19	0.12723	0.998343	50.3343
17.32	48.671	48.653	47.479	47.987	49.304	49.755	1.60816e-05	0.0026318	0.013384	19.95	20.911	5.87	1.15	0.137517	0.998675	58.4159
17.33	48.699	48.681	47.523	48.02	49.326	49.772	2.29139e-05	0.0030157	0.015164	20.1339	16.6277	7.82	1	0.151723	0.999347	52.1779
17.34	48.73	48.712	47.587	48.062	49.344	49.78	3.08424e-05	0.0036206	0.016949	20.3428	13.8074	9.29	1.02	0.166689	0.99948	48.3425
17.35	48.763	48.744	47.648	48.107	49.361	49.785	3.8789e-05	0.0042124	0.018897	20.3485	12.2406	7.47	0.93	0.180166	0.999679	46.5596
17.36	48.796	48.775	47.702	48.151	49.38	49.791	4.05701e-05	0.0047959	0.020948	20.4664	12.9734	9.65	1.18	0.196564	0.998899	54.9641
17.37	48.83	48.807	47.749	48.196	49.399	49.797	4.25212e-05	0.0053592	0.022707	20.4046	13.4175	6.97	0.9	0.200981	0.999879	57.7195
17.38	48.865	48.838	47.79	48.239	49.418	49.802	4.31954e-05	0.0059177	0.024507	20.3247	14.2551	8.06	1.58	0.20939	0.999504	63.1965
17.39	48.898	48.87	47.824	48.283	49.438	49.809	4.12045e-05	0.0064461	0.026692	20.273	16.2762	7.09	1.52	0.209148	0.999795	73.2541
17.4	48.932	48.901	47.858	48.326	49.457	49.815	4.07672e-05	0.007064	0.029671	19.7775	18.2868	7.96	0.65	0.212306	0.999879	81.5852
17.41	48.967	48.932	47.887	48.367	49.477	49.821	4.14184e-05	0.007962	0.032897	19.6978	19.9563	9.78	1.62	0.208965	0.999291	86.6933
17.42	49.002	48.962	47.913	48.408	49.498	49.828	4.84773e-05	0.0088042	0.035981	19.5274	18.6488	9.35	1.37	0.222922	0.999852	85.0047
17.43	49.035	48.991	47.937	48.444	49.517	49.835	5.79604e-05	0.0098186	0.03838	19.4946	16.6376	10.31	1.09	0.224831	0.999779	76.642
17.44	49.068	49.019	47.96	48.48	49.537	49.841	6.76679e-05	0.010583	0.039533	19.4614	14.6789	7.78	1.29	0.236476	0.999838	70.8313
17.45	49.101	49.047	47.981	48.515	49.556	49.847	7.00824e-05	0.010798	0.03865	19.4333	13.8566	5.76	1.33	0.254759	0.999872	71.8526
17.46	49.134	49.074	48.002	48.55	49.575	49.853	6.96534e-05	0.010564	0.034734	19.541	12.5294	5.2	1.44	0.275489	0.999916	70.3067
17.529	49.394	49.2839	48.1481	48.777	49.7343	49.908	8.46372e-05	0.017127	0.050616	21.0398	15.026	6.74	0.95	0.322064	0.997197	104.371
17.539	49.4349	49.3158	48.1671	48.8043	49.764	49.9198	7.69226e-05	0.017509	0.05279	20.5508	17.2431	6.76	0.76	0.315914	0.99775	115.044
17.549	49.4741	49.3478	48.1861	48.8304	49.7967	49.9327	6.78969e-05	0.017213	0.053185	20.1188	19.6814	6.53	0.76	0.303736	0.998629	123.903
17.559	49.5104	49.3789	48.206	48.8564	49.8324	49.9502	6.19545e-05	0.016478	0.052382	19.7541	21.2435	5.92	0.72	0.291911	0.999195	125.773
17.569	49.5482	49.4144	48.2287	48.886	49.8738	49.9808	5.64293e-05	0.01537	0.050825	19.3032	22.6303	6.03	0.95	0.280068	0.99933	125.02
17.579	49.6033	49.4693	48.2769	48.934	49.9311	50.0506	4.78406e-05	0.014284	0.048097	19.1432	25.2603	5.035	0.71	0.268386	0.999508	132.521
17.589	49.6738	49.5425	48.3495	49.0083	50.0018	50.1453	4.18856e-05	0.012684	0.044466	18.8244	26.6735	5.68	1.08	0.258043	0.999494	131.155
17.599	49.7485	49.6202	48.4281	49.0862	50.0756	50.2567	3.35016e-05	0.01105	0.039902	18.6354	29.9258	5.17	1.64	0.246103	0.999118	137.474
17.609	49.8208	49.6973	48.5017	49.1615	50.1514	50.3778	2.27184e-05	0.0093756	0.034636	18.4988	38.306	5.61	1.68	0.238591	0.999339	171.007
17.619	49.8928	49.7752	48.5729	49.2365	50.2292	50.5079	1.4767e-05	0.0077791	0.029549	18.3263	50.2768	5.6	1.79	0.235628	0.999061	212.752
17.629	49.963	49.8523	48.643	49.3097	50.3117	50.6425	1.21332e-05	0.006476	0.024761	18.1905	51.2754	5.76	1.82	0.22216	0.999557	205.584
17.639	50.0321	49.9302	48.7121	49.3818	50.3956	50.7766	1.21242e-05	0.0051646	0.020672	18.1462	42.8399	7.78	1.63	0.210715	0.998854	159.368
17.649	50.1002	50.0073	48.7784	49.4529	50.4823	50.9169	1.27815e-05	0.0044374	0.01783	17.8635	35.0499	7.03	1.32	0.20927	0.999779	128.467
17.659	50.1682	50.0852	48.8417	49.5221	50.5711	51.0597	1.38934e-05	0.0039709	0.015761	17.9583	28.5031	7.62	1.46	0.197672	0.999763	99.0327
17.669	50.2353	50.1623	48.9029	49.5902	50.661	51.2036	1.69898e-05	0.0035611	0.014776	17.7746	21.8517	7.38	1.35	0.189197	0.999806	72.9732
17.679	50.3014	50.2402	48.9648	49.6573	50.7528	51.3485	1.61113e-05	0.0035366	0.014065	17.7571	21.9344	7.16	1.4	0.192582	0.999718	74.8479
17.689	50.3674	50.3173	49.025	49.7243	50.8466	51.4935	1.61059e-05	0.0035401	0.013604	17.9913	21.2225	7.56	1.43	0.198037	0.999883	76.4687
17.699	50.4334	50.3952	49.085	49.7904	50.9415	51.6394	1.47898e-05	0.0036486	0.013302	18.1522	22.5981	8.13	1.49	0.209598	0.999896	87.4862
17.709	50.4985	50.4723	49.1432	49.8546	51.0374	51.7881	1.7613e-05	0.0037351	0.013254	18.1891	18.9073	7.92	1.55	0.219912	0.999893	77.1929
17.719	50.5644	50.5502	49.1994	49.9177	51.1352	51.9362	2.05262e-05	0.0036969	0.012971	18.2695	15.8775	11.07	1.55	0.22522	0.999881	67.2361
17.729	50.6304	50.6273	49.2563	49.9807	51.2332	52.086	2.5777e-05	0.0035174	0.012288	18.5309	11.9775	6.45	1.55	0.226908	0.999877	52.1202
17.739	50.6964	50.7052	49.3106	50.0437	51.3312	52.2369	2.33566e-05	0.0032818	0.011419	18.6244	12.2839	7.34	1.61	0.229347	0.999842	54.6954
17.749	50.7624	50.7832	49.3664	50.104	51.4301	52.387	1.65514e-05	0.0030707	0.010689	18.7441	16.2263	7.39	1.72	0.230121	0.999753	73.13
17.759	50.8293	50.8603	49.4224	50.1631	51.5282	52.5388	1.14624e-05	0.0028823	0.0098942	18.7613	21.6882	8.4	1.87	0.234111	0.999504	99.0023
17.769	50.8954	50.9382	49.4766	50.223	51.6271	52.6908	1.12522e-05	0.002528	0.0088374	18.9043	19.7335	9.54	2.22	0.235222	0.998992	90.5335
17.779	50.9605	51.0153	49.5315	50.283	51.727	52.8446	1.16625e-05	0.0022256	0.0077039	18.9258	16.5973	11.51	2.7	0.223032	0.997547	73.1139
17.789	51.0282	51.0932	49.5829	50.3412	51.8279	52.9995	1.05769e-05	0.001757	0.0066252	19.4519	15.7383	7.85	3.42	0.20426	0.996749	65.127
17.799	51.0953	51.1703	49.6357	50.3992	51.928	53.1527	8.14773e-06	0.001599	0.0060502	19.041	18.6574	9.53	4.02	0.191594	0.993235	71.0272
17.809	51.1623	51.2482	49.6869	50.4563	52.0289	53.3057	7.50931e-06	0.0015544	0.0060818	18.9174	20.3493	10.44	3.96	0.18139	0.993912	71.972
17.819	51.2293	51.3253	49.7397	50.5124	52.1299	53.4596	1.0146e-05	0.0017182	0.0064744	18.657	16.0332	11.14	3.51	0.185448	0.994706	55.8947
17.829	51.2954	51.4032	49.7873	50.5675	52.2327	53.6154	1.0119e-05	0.001997	0.0074692	17.9526	18.5462	14.04	2.64	0.189948	0.995927	62.3265
17.839	51.3632	51.4803	49.837	50.6243	52.3357	53.7696	1.43416e-05	0.0023471	0.0087294	17.9909	15.2934	11.2	1.91	0.186491	0.997877	50.348
17.849	51.4303	51.5582	49.8852	50.6795	52.4396	53.9263	1.80763e-05	0.0028383	0.010172	17.7251	14.1389	10.63	1.45	0.185644	0.99861	45.8269
17.859	51.4991	51.6353	49.9341	50.7354	52.5418	54.0797	2.02591e-05	0.0030722	0.011493	17.5715	14.2538	9.28	1.27	0.187388	0.997975	45.7918
17.869	51.5672	51.7132	49.984	50.7896	52.6447	54.2345	2.16089e-05	0.0032395	0.012458	17.3942	14.4855	13.41	1.22	0.18192	0.999081	45.1991
17.879	51.6352	51.7903	50.0304	50.8445	52.7486	54.3895	1.98596e-05	0.0032221	0.012634	17.4616	15.9841	10.72	1.14	0.17853	0.998878	48.7296
17.889	51.7041	51.8682	50.0782	50.8986	52.8535	54.5463	1.54432e-05	0.0030381	0.01203	17.4207	19.5725	9.43	1.11	0.176024	0.998798	58.7477
17.899	51.7722	51.9453	50.1262	50.9517	52.9558	54.706	8.18385e-06	0.0026862	0.01068	17.4789	32.7892	9	1.13	0.173831	0.998778	97.7315
17.909	51.8402	52.0232	50.1751	51.0047	53.0596	54.866	3.08029e-06	0.002243	0.0089105	17.4624	72.6821	8.36	1.18	0.171933	0.997816	214.262
17.919	51.9082	52.1003	50.2241	51.0577	53.1636	55.0233	-4.50852e-07	0.0016194	0.0069324	17.2323	-386.337	6.13	1.4	0.173592	0.9962	-1120.1
17.929	51.9771	52.1782	50.2704	51.1098	53.2676	55.1767	1.07583e-08	0.0012131	0.0049326	17.5227	11519.9	11.28	1.92	0.167326	0.994746	33079.5
17.939	52.0452	52.2553	50.3155	51.1618	53.3707	55.3324	-2.21169e-06	0.00068613	0.0033369	17.9584	-37.9084	18.57	3.47	0.156797	0.992663	-103.319
17.949	52.1132	52.3332	50.3605	51.2147	53.4746	55.4902	-8.85533e-07	0.0004921	0.0022631	18.0889	-64.212	15.52	4.78	0.1434	0.980999	-167.752
17.959	52.1812	52.4103	50.4064	51.2668	53.5777	55.6509	-6.55417e-07	0.00036438	0.0016802	19.0237	-64.4111	13.42	8.42	0.140299	0.980062	-167.847
17.969	52.2501	52.4882	50.4497	51.3197	53.6816	55.8101	-8.99042e-07	0.00030829	0.0014465	18.8419	-40.4255	15.65	9.99	0.132883	0.980841	-104.406
17.979	52.3191	52.5653	50.4936	51.3718	53.7865	55.9718	2.21917e-07	0.00027886	0.001292	19.0905	146.281	14.33	10.02	0.131167	0.982851	385.374
17.989	52.3881	52.6432	50.5358	51.4229	53.8915	56.1284	1.9901e-06	0.00025771	0.0011248	18.8965	14.2009	13.35	9.84	0.1377	0.966547	40.412
17.999	52.458	52.7203	50.5796	51.4748	53.9956	56.2844	-4.31186e-07	0.00024435	0.0011851	19.5717	-69.0569	14.99	9.69	0.120417	0.986567	-179.393
18.009	52.5262	52.7982	50.6227	51.5259	54.1014	56.4422	-1.10626e-06	0.0002557	0.0012656	19.5472	-28.7447	15.42	8.68	0.115083	0.986901	-71.3361
18.019	52.5951	52.8753	50.6666	51.5778	54.2056	56.6011	-8.85536e-07	0.00029962	0.0014822	19.4328	-42.055	14.97	7.63	0.114511	0.990057	-99.2529
18.029	52.6641	52.9532	50.7124	51.6298	54.3105	56.7592	-1.55084e-06	0.00037303	0.0020086	18.4058	-32.542	18.92	6.76	0.115169	0.992606	-68.8274
18.039	52.7331	53.0303	50.7557	51.6809	54.4155	56.9217	2.00977e-06	0.0005196	0.0028407	18.9957	35.5137	15.07	5.68	0.110146	0.996683	72.5854
18.049	52.8021	53.1082	50.7987	51.7328	54.5205	57.0793	4.2064e-06	0.0008404	0.0042356	18.873	25.3	15.12	4.14	0.124129	0.997558	56.647
18.059	52.8711	53.1853	50.8408	51.7839	54.6255	57.2381	7.49034e-06	0.0014153	0.0065492	18.2096	21.9687	16.43	2.98	0.144615	0.998371	54.5676
18.069	52.9401	53.2632	50.8837	51.8349	54.7314	57.3953	1.14559e-05	0.0023359	0.0098557	18.3593	21.616	18.56	2.31	0.154673	0.999128	58.7644
18.079	53.0091	53.3403	50.9276	51.8859	54.8365	57.5541	2.07165e-05	0.0033898	0.013813	18.4746	16.7528	12.13	3.54	0.174492	0.995626	52.7599
18.089	53.079	53.4182	50.9698	51.936	54.9406	57.7095	3.26296e-05	0.0042644	0.017927	18.7244	13.8042	14.57	2.26	0.165083	0.999047	41.3612
18.094	53.1136	53.4568	50.9908	51.9618	54.9938	57.787	4.14385e-05	0.0039055	0.018883	19.3426	11.4494	9.42	3.14	0.140199	0.998428	32.4771
18.104	53.1822	53.5342	51.0324	52.0134	55.1004	57.9432	4.71696e-05	0.0046283	0.022457	19.4772	11.9621	9.45	3.09	0.142806	0.999041	34.8254
18.114	53.251	53.6118	51.0734	52.064	55.2056	58.1	5.02373e-05	0.0052733	0.025391	19.4954	12.699	10.66	4.1	0.153468	0.995942	40.5077
18.124	53.3206	53.6892	51.1144	52.1144	55.3104	58.2574	5.09036e-05	0.0056512	0.02742	20.0279	13.5343	9.34	3.02	0.155627	0.998047	44.8003
18.134	53.3896	53.7668	51.155	52.165	55.416	58.4172	5.07098e-05	0.006207	0.029019	20.755	14.3783	7.67	4.47	0.159738	0.996385	51.3017
18.144	53.4586	53.8442	51.195	52.2154	55.5214	58.5756	5.64131e-05	0.007078	0.030819	22.4152	13.7264	6.88	5.26	0.187564	0.997409	61.429
18.154	53.5276	53.9218	51.2346	52.266	55.627	58.7338	6.78808e-05	0.0088799	0.033419	23.2329	12.3698	7.16	3.71	0.246362	0.995657	74.6338
18.164	53.597	53.9988	51.274	52.316	55.7324	58.8908	0.000101629	0.01181	0.037566	25.1122	9.28737	6.61	2.53	0.306576	0.993269	75.6563
18.174	53.667	54.0762	51.3144	52.366	55.838	59.049	0.000195282	0.015886	0.043063	26.8534	5.54064	6.69	1.87	0.369025	0.992582	55.2382
18.184	53.7366	54.1538	51.3554	52.4164	55.9426	59.2074	0.00033352	0.019865	0.048511	28.164	3.65456	8.23	2.01	0.412633	0.995104	42.3123
18.194	53.8064	54.2312	51.3964	52.4674	56.0478	59.3642	0.000391277	0.02283	0.052809	28.9987	3.3911	10.47	1.48	0.440731	0.99566	42.4226
18.204	53.877	54.3088	51.4374	52.518	56.1536	59.5218	0.00034631	0.02484	0.055952	29.512	4.05945	8.74	1.58	0.448305	0.996867	52.4443
18.214	53.947	54.3858	51.4784	52.5684	56.2584	59.678	0.000260335	0.025436	0.057648	30.0156	5.56376	7.73	1.54	0.445161	0.997644	71.6039
18.224	54.0166	54.4632	51.5178	52.6194	56.3644	59.8334	0.000186941	0.024676	0.056405	29.813	7.58107	8.01	1.57	0.441532	0.997363	96.2122
18.234	54.086	54.5408	51.556	52.67	56.47	59.989	0.000120154	0.022341	0.052268	29.2486	10.9299	7.67	1.05	0.430254	0.997037	133.271
18.244	54.1556	54.6178	51.5956	52.72	56.575	60.146	8.10921e-05	0.019063	0.047186	28.3835	14.6201	7.5	1.23	0.401083	0.998269	164.147
18.254	54.2254	54.6952	51.6338	52.77	56.68	60.3044	6.30439e-05	0.015135	0.041962	27.1971	16.7236	6.14	1.28	0.35434	0.998395	161.982
18.264	54.2964	54.7728	51.672	52.8204	56.7854	60.4616	5.50965e-05	0.01171	0.037434	25.5898	17.071	6.35	2.97	0.288165	0.998387	131.141
18.274	54.367	54.8498	51.7108	52.8714	56.891	60.6198	5.46403e-05	0.0088367	0.033448	24.2665	15.3806	6.04	2.83	0.232951	0.999227	92.3989
18.284	54.437	54.9268	51.7486	52.922	56.9956	60.7756	5.64076e-05	0.0071282	0.030209	23.4023	13.456	0	2.52	0.199732	0.999333	67.4838
18.294	54.5066	55.0042	51.7872	52.972	57.1	60.93	5.26737e-05	0.0062321	0.027622	22.5866	13.1758	6.99	2.66	0.180268	0.999379	58.346
18.304	54.5756	55.0818	51.826	53.022	57.2054	61.0846	4.51744e-05	0.0057298	0.025754	22.4872	14.3241	7.28	2.67	0.17979	0.999418	62.4601
18.314	54.645	55.1588	51.8656	53.072	57.311	61.237	3.99147e-05	0.0055474	0.024299	22.2665	15.2958	8.66	1.73	0.176345	0.99961	63.8562
18.324	54.7146	55.2358	51.9042	53.1228	57.4164	61.389	3.92222e-05	0.0052753	0.022882	22.0011	14.6581	6.7	2.15	0.18569	0.999727	63.8694
18.334	54.784	55.3128	51.9426	53.174	57.5216	61.5436	3.85703e-05	0.0047812	0.021137	22.088	13.7691	17.3	2.87	0.182796	0.998879	60.2769
18.344	54.854	55.3902	51.982	53.2244	57.6264	61.696	3.43927e-05	0.004453	0.019342	22.0159	14.1303	7.5	2.33	0.187373	0.999694	61.2165
18.354	54.9236	55.4678	52.0212	53.275	57.732	61.848	3.04041e-05	0.0039134	0.017624	21.9996	14.5643	7.26	2.65	0.186777	0.999433	62.245
18.364	54.993	55.5448	52.06	53.325	57.837	62.0014	2.58041e-05	0.0036051	0.016011	22.0186	15.59	8.44	2.51	0.178356	0.999032	62.6179
18.374	55.0626	55.6218	52.1	53.3746	57.942	62.1528	2.24783e-05	0.0030895	0.014257	21.949	15.9361	9.51	3.52	0.188046	0.997348	67.7943
18.384	55.132	55.6988	52.1396	53.424	58.0474	62.3052	1.895e-05	0.0028986	0.012718	22.3958	16.8626	11.41	3.43	0.191212	0.9997	74.3007
18.394	55.202	55.7758	52.1778	53.474	58.1526	62.457	1.89592e-05	0.0027743	0.011825	22.4359	15.671	21.9	3.52	0.204033	0.998888	74.734
18.404	55.272	55.8528	52.2144	53.5244	58.257	62.6054	2.88613e-05	0.0028865	0.01148	23.0983	9.9941	23.53	3.17	0.222914	0.998453	54.8521
18.414	55.342	55.9298	52.2512	53.575	58.362	62.7542	3.52511e-05	0.0032069	0.011816	23.5989	8.42199	10.94	2.82	0.247209	0.998098	53.0026
18.424	55.412	56.0064	52.2892	53.6246	58.4666	62.9068	4.27544e-05	0.0036495	0.012872	24.1188	7.56454	12.09	2.61	0.261299	0.998444	51.4146
18.434	55.482	56.0828	52.3272	53.674	58.571	63.0584	5.00255e-05	0.0041356	0.014257	24.3749	7.16067	9.64	2.51	0.265559	0.99818	50.4163
18.444	55.552	56.1598	52.366	53.7244	58.6756	63.2062	4.89109e-05	0.0048375	0.015968	24.2885	8.20279	7.6	3.05	0.284309	0.999228	61.062
18.454	55.6216	56.2368	52.4048	53.775	58.7804	63.3524	4.73962e-05	0.0053747	0.017406	24.7153	9.22725	7.67	2.33	0.278457	0.998449	68.073
18.464	55.6914	56.3134	52.4426	53.8254	58.8856	63.5046	4.97974e-05	0.0056883	0.018507	24.7892	9.33784	7.78	2.14	0.283509	0.998821	69.9615
18.474	55.762	56.3898	52.4816	53.876	58.9896	63.6582	4.93628e-05	0.0060224	0.019125	24.81	9.73461	6.18	1.99	0.284508	0.998098	72.4817
18.484	55.832	56.4668	52.5198	53.9264	59.0936	63.8112	4.82735e-05	0.0059821	0.019447	25.1631	10.1219	7.69	2.01	0.283601	0.998942	75.7579
18.494	55.9016	56.5434	52.5576	53.977	59.1976	63.965	5.09083e-05	0.005966	0.019764	24.9649	9.75447	7.61	2.07	0.278381	0.999024	70.8981
18.504	55.9714	56.6198	52.5958	54.027	59.3004	64.12	5.09199e-05	0.0059742	0.01988	24.977	9.80947	8.52	2.1	0.273642	0.999042	70.2456
18.514	56.042	56.6964	52.6328	54.0766	59.4022	64.2742	5.3121e-05	0.0059892	0.020033	24.8817	9.47539	9.83	2.04	0.272089	0.999266	66.9698
18.524	56.112	56.7724	52.6702	54.1256	59.5048	64.428	5.15872e-05	0.0059579	0.020234	24.5839	9.855	8.64	1.83	0.269086	0.999377	68.0072
18.534	56.1824	56.8488	52.7082	54.1754	59.6072	64.5814	5.33491e-05	0.0058758	0.020116	24.3033	9.47396	8.38	1.58	0.264384	0.999387	63.8886
18.544	56.253	56.9254	52.7462	54.2256	59.7102	64.734	5.07099e-05	0.0057595	0.019936	23.8531	9.87785	6.36	1.61	0.260238	0.999502	64.5003
18.554	56.323	57.0014	52.7838	54.275	59.812	64.8894	5.06964e-05	0.0056252	0.019706	23.2032	9.76649	7.27	1.77	0.258006	0.999518	61.3989
18.564	56.3934	57.0774	52.82	54.325	59.912	65.0446	4.9572e-05	0.0054791	0.019286	23.0338	9.77513	7.41	1.89	0.250751	0.999608	59.5054
18.574	56.4636	57.1534	52.8558	54.3746	60.0124	65.199	4.62655e-05	0.0053131	0.018782	22.6361	10.2	7.68	2.01	0.25038	0.999465	60.3085
18.584	56.5334	57.2294	52.8928	54.4244	60.113	65.354	4.58417e-05	0.0051313	0.018365	22.519	10.0658	9.54	2.15	0.244693	0.999603	57.6157
18.594	56.6036	57.3054	52.9298	54.475	60.213	65.5098	4.91536e-05	0.0048452	0.017917	22.4085	9.15855	9.2	2.2	0.239968	0.999661	50.7654
18.604	56.673	57.381	52.9668	54.525	60.313	65.6648	4.87342e-05	0.0048057	0.017517	22.4903	9.03114	8	2.26	0.234862	0.999758	49.0292
18.614	56.7426	57.4564	53.0038	54.5754	60.4122	65.8156	4.9158e-05	0.0046393	0.017013	22.4618	8.69568	9.81	2.34	0.231477	0.999592	46.3668
18.624	56.812	57.532	53.0416	54.626	60.511	65.9678	4.74033e-05	0.0043469	0.016234	22.4224	8.60466	9.47	2.47	0.22654	0.999592	44.6319
18.704	57.371	58.133	53.3378	55.0266	61.293	67.215	4.34365e-05	0.0035817	0.01537	24.3348	8.8907	11.14	0.87	0.184865	0.999636	41.2925
18.714	57.441	58.2076	53.3736	55.0764	61.3892	67.3722	3.85781e-05	0.0036476	0.015742	24.2129	10.2526	11.19	1.02	0.194469	0.999526	49.7976
18.724	57.5106	58.282	53.4088	55.1274	61.4864	67.5268	3.33016e-05	0.0036332	0.015766	23.9609	11.8952	10.11	1.03	0.195093	0.99969	57.2555
18.734	57.58	58.3566	53.4462	55.1776	61.5804	67.6842	3.10869e-05	0.0034956	0.015337	23.6179	12.396	7.05	0.93	0.193777	0.999784	58.4362
18.744	57.6496	58.4306	53.4834	55.227	61.673	67.8414	2.78082e-05	0.0033563	0.014834	22.9374	13.403	8.75	0.89	0.194223	0.999722	61.3991
18.754	57.719	58.5046	53.5194	55.277	61.7672	67.9978	2.7557e-05	0.0032878	0.014753	22.7258	13.4513	10.21	0.86	0.188149	0.999566	59.2698
18.764	57.7886	58.5786	53.5546	55.327	61.8598	68.1544	3.19572e-05	0.0033288	0.015193	22.4288	11.9451	10.62	0.82	0.183332	0.999763	50.5457
18.774	57.8576	58.6526	53.5894	55.3774	61.9514	68.31	3.70461e-05	0.0034659	0.016086	22.0625	10.9099	13.87	0.78	0.180401	0.999721	44.7577
18.784	57.9266	58.7266	53.6258	55.4284	62.0424	68.4642	4.21001e-05	0.0036676	0.017025	22.0675	10.1606	12.92	0.75	0.178016	0.999867	41.3705
18.794	57.9952	58.8002	53.6632	55.4786	62.1342	68.6176	4.36492e-05	0.003837	0.018009	22.0174	10.3664	8.64	0.72	0.17662	0.999806	41.9916
18.804	58.0636	58.8736	53.7008	55.528	62.2264	68.7716	4.40939e-05	0.0039463	0.018414	21.9601	10.4927	8.94	0.7	0.17873	0.999789	43.04
18.814	58.1326	58.9472	53.7382	55.578	62.3174	68.9268	4.40821e-05	0.0039514	0.018091	22.1082	10.3114	9.41	0.65	0.181887	0.999806	43.4757
18.824	58.2016	59.0202	53.7774	55.6276	62.4076	69.0854	4.38666e-05	0.0038227	0.017219	22.2363	9.86259	8.14	0.63	0.185113	0.999802	42.7045
18.834	58.2706	59.0932	53.8168	55.6766	62.4962	69.2448	4.01345e-05	0.003598	0.015944	22.3579	9.98152	8.3	0.65	0.188574	0.999692	44.3509
18.844	58.3396	59.1662	53.853	55.7264	62.5834	69.4018	4.54022e-05	0.0033112	0.014454	22.6764	7.99887	5.89	0.7	0.191357	0.999869	36.6987
18.854	58.4078	59.2388	53.8888	55.7774	62.671	69.5584	5.31457e-05	0.003072	0.013286	22.8272	6.2812	5.78	0.75	0.193406	0.999843	29.4981
18.864	58.4752	59.3112	53.9262	55.828	62.7614	69.7148	5.8414e-05	0.0028944	0.012546	23.1125	5.39642	6.68	0.8	0.193361	0.9997	25.6668
18.874	58.5428	59.3838	53.9642	55.878	62.85	69.8714	6.30538e-05	0.0028007	0.012259	23.3553	4.88496	8.2	0.84	0.190754	0.999818	23.2896
18.884	58.6102	59.4558	54.001	55.928	62.9354	70.0286	6.36949e-05	0.0027989	0.012121	23.7361	4.78135	9.04	0.83	0.190692	0.99974	23.2107
18.894	58.6782	59.5278	54.0364	55.9784	63.0218	70.1872	6.12861e-05	0.0028614	0.012219	23.963	5.00945	9.33	0.79	0.193591	0.99968	24.9339
18.904	58.7458	59.5998	54.0728	56.029	63.1096	70.3452	5.92967e-05	0.0029516	0.012282	24.2804	5.20422	9.33	0.72	0.199201	0.999705	27.0082
18.914	58.8128	59.6718	54.1098	56.0794	63.1978	70.5028	5.59836e-05	0.0030083	0.012217	24.5839	5.48303	9.49	0.64	0.205352	0.999717	29.6087
18.924	58.8798	59.7438	54.146	56.13	63.2856	70.6594	5.07079e-05	0.0029773	0.011895	24.8498	5.89394	8.43	0.66	0.209592	0.9997	32.7543
18.934	58.9464	59.8154	54.1818	56.18	63.3742	70.8158	4.25393e-05	0.0028529	0.011211	25.302	6.62172	7.96	0.78	0.211513	0.999651	37.6757
18.944	59.0128	59.8868	54.2188	56.23	63.4598	70.9732	3.37216e-05	0.0026758	0.010425	25.3246	7.76756	7.42	0.96	0.215224	0.999383	44.725
18.954	59.0794	59.9584	54.2566	56.2804	63.5418	71.1312	2.9556e-05	0.0024584	0.0095424	26.0372	8.11201	8.34	1.24	0.21404	0.998954	47.1342
18.964	59.1458	60.0294	54.2944	56.3314	63.6246	71.2892	2.4921e-05	0.0022112	0.0087138	25.8647	8.78533	7.72	1.54	0.214143	0.999314	50.4513
18.974	59.212	60.1004	54.3308	56.3824	63.7078	71.4472	2.46794e-05	0.0019477	0.0076946	25.9584	7.83371	8.57	1.84	0.211982	0.999033	44.4945
18.984	59.2774	60.1714	54.3678	56.4334	63.7914	71.6044	2.07299e-05	0.0016898	0.006914	25.3374	8.3801	10.86	2.16	0.201565	0.99933	44.7899
18.994	59.3434	60.2424	54.4056	56.4848	63.8774	71.7604	1.80777e-05	0.0015063	0.0063468	25.2319	8.82123	10.91	2.82	0.194285	0.997243	44.4786
19.004	59.409	60.3134	54.4446	56.5364	63.963	71.9168	1.63135e-05	0.0014251	0.0061992	24.3611	9.54787	11.19	2.36	0.181289	0.997582	42.4006
19.014	59.4744	60.384	54.4828	56.5874	64.0464	72.0738	1.74271e-05	0.0014852	0.0063467	22.8637	9.15041	13.12	2.17	0.180863	0.999479	38.5957
19.024	59.5404	60.4544	54.5194	56.6384	64.1278	72.2316	2.09365e-05	0.0015971	0.0067409	21.939	8.08969	11.07	1.85	0.181009	0.999348	32.7381
19.034	59.6056	60.525	54.5554	56.6894	64.2114	72.3898	2.35806e-05	0.001707	0.0072123	21.3234	7.68485	10.41	1.61	0.179664	0.9993	29.9555
19.044	59.6696	60.5954	54.5926	56.7412	64.2966	72.5464	2.3806e-05	0.0017928	0.0077744	20.6961	8.20534	11.79	1.45	0.176207	0.999241	30.4267
19.054	59.7336	60.666	54.6316	56.7934	64.3794	72.7024	1.98418e-05	0.0018592	0.0082399	20.3999	10.4342	10.81	1.36	0.171747	0.999122	37.2274
19.064	59.7968	60.736	54.6698	56.8452	64.4608	72.8592	1.61042e-05	0.0019181	0.0086972	20.4221	13.5693	11.84	1.24	0.165823	0.999321	46.7611
19.074	59.8592	60.806	54.7068	56.8978	64.5432	73.0164	1.38918e-05	0.0020042	0.009254	20.257	16.7374	11.76	1.09	0.16224	0.999039	56.0893
19.084	59.923	60.876	54.7438	56.9498	64.6278	73.1732	1.51864e-05	0.0021263	0.010096	20.5242	16.7036	13.03	1.13	0.154104	0.998824	54.3183
19.094	59.9868	60.946	54.7804	57.0022	64.7136	73.3304	1.96421e-05	0.0023012	0.011435	20.5574	14.6274	12.61	1.32	0.146107	0.99795	45.7187
19.104	60.0492	61.016	54.8172	57.0548	64.7976	73.4876	2.64584e-05	0.0025377	0.013199	20.8456	12.5341	13.13	1.45	0.138691	0.998053	37.8178
19.114	60.1126	61.086	54.8552	57.1068	64.882	73.6462	3.39427e-05	0.0028501	0.015371	20.8229	11.3782	14.23	1.6	0.135023	0.998081	33.4623
19.124	60.1762	61.1556	54.8928	57.1592	64.9662	73.8038	3.90182e-05	0.0033331	0.017494	20.8691	11.2652	10.51	1.81	0.134369	0.997489	33.2332
19.134	60.2392	61.225	54.9302	57.2122	65.0508	73.9608	4.05529e-05	0.0036232	0.019783	21.0286	12.2571	11.01	1.98	0.134522	0.998113	36.3895
19.144	60.3014	61.295	54.9682	57.2656	65.1382	74.1186	4.21263e-05	0.0039634	0.021586	21.2937	12.8747	11.05	2.03	0.13638	0.998391	39.27
19.154	60.3632	61.3646	55.0066	57.3192	65.225	74.276	4.34428e-05	0.0042093	0.022896	21.6719	13.2422	8.34	2.01	0.137104	0.998872	41.3233
19.164	60.4254	61.434	55.0452	57.3726	65.3116	74.431	4.54238e-05	0.0043629	0.023604	21.9671	13.0563	10.28	1.97	0.140939	0.998372	42.5812
19.174	60.4868	61.5036	55.0836	57.4262	65.399	74.5856	5.06905e-05	0.0044134	0.023987	22.1712	11.8896	8.98	1.98	0.143595	0.998337	39.7471
19.184	60.5488	61.573	55.1222	57.4796	65.4844	74.7404	5.0486e-05	0.0044138	0.024044	22.6522	11.9661	8.31	1.98	0.144473	0.998564	41.0748
19.194	60.6104	61.6426	55.1606	57.5344	65.5708	74.8964	5.33353e-05	0.0043786	0.023883	22.8632	11.251	7.14	1.95	0.147619	0.998433	39.6211
19.204	60.6714	61.712	55.2004	57.5896	65.6586	75.0528	5.3776e-05	0.0043194	0.023447	23.1263	10.9551	6.39	1.94	0.150567	0.998778	39.6664
19.214	60.7324	61.7816	55.2406	57.6448	65.7476	75.2114	5.02613e-05	0.0042475	0.022793	23.4197	11.3942	5.26	1.9	0.153474	0.998929	42.474
19.224	60.793	61.851	55.2796	57.7014	65.8346	75.372	4.97969e-05	0.0041673	0.022216	23.5363	11.2093	4.77	1.89	0.155564	0.999115	42.4885
19.234	60.8526	61.921	55.3206	57.757	65.919	75.5316	4.82858e-05	0.0040757	0.021557	23.502	11.2172	6.35	1.92	0.157806	0.999036	42.9526
19.244	60.912	61.9906	55.3634	57.8132	66.0048	75.689	4.60857e-05	0.003984	0.020906	23.3348	11.3978	5.85	1.92	0.159675	0.999104	43.7707
19.254	60.9724	62.06	55.4048	57.8708	66.091	75.844	4.51948e-05	0.0039181	0.020433	23.3795	11.3595	6.86	1.89	0.159024	0.999381	43.4475
19.264	61.0326	62.1296	55.4464	57.927	66.178	75.9986	4.32183e-05	0.0038943	0.020295	23.218	11.7988	7.21	1.84	0.158267	0.999346	44.5298
19.274	61.0924	62.199	55.4874	57.9832	66.2672	76.1546	4.58503e-05	0.0039045	0.020247	23.1289	11.0952	6.67	1.78	0.157921	0.999329	41.5984
19.284	61.1526	62.269	55.5292	58.0408	66.3548	76.3132	4.62984e-05	0.0039259	0.020194	23.0731	10.9591	6.56	1.72	0.158402	0.999235	41.0835
19.294	61.2116	62.339	55.5718	58.099	66.4422	76.4704	4.63057e-05	0.0039417	0.020018	23.1417	10.8618	6.92	1.7	0.159688	0.99917	41.1332
19.304	61.271	62.409	55.6138	58.1582	66.5298	76.6264	4.63056e-05	0.0039468	0.019909	23.1398	10.8027	5.84	1.65	0.162129	0.999172	41.3189
19.314	61.331	62.4786	55.6558	58.2178	66.6188	76.7824	4.36583e-05	0.0039273	0.019436	23.3367	11.1855	6.97	1.62	0.165565	0.998868	43.8794
19.324	61.391	62.548	55.6978	58.279	66.7108	76.9392	4.43048e-05	0.003844	0.01873	23.3858	10.6219	8.03	1.59	0.170398	0.998468	42.6839
19.334	61.4506	62.6184	55.7414	58.3378	66.8028	77.094	4.16809e-05	0.0036635	0.01759	23.5119	10.6034	7.58	1.55	0.1737	0.998589	43.6219
19.344	61.51	62.689	55.7878	58.396	66.8956	77.246	3.94511e-05	0.0033736	0.016217	23.6778	10.3283	7.77	1.55	0.174637	0.99846	43.0432
19.354	61.5696	62.759	55.8332	58.456	66.9896	77.3986	3.61634e-05	0.003045	0.014703	23.8404	10.2154	7.5	1.55	0.174403	0.998168	42.6951
19.364	61.6278	62.829	55.8758	58.5168	67.0844	77.5488	3.1528e-05	0.0027598	0.013187	23.9936	10.5091	8.1	1.5	0.174926	0.997033	44.2718
19.374	61.6856	62.8994	55.917	58.5784	67.178	77.7008	2.62384e-05	0.0025227	0.012087	24.0446	11.5744	8.92	1.46	0.173275	0.997246	48.6425
19.384	61.7442	62.97	55.959	58.639	67.268	77.8536	2.49183e-05	0.0023262	0.011325	23.9939	11.4192	8.55	1.28	0.169315	0.998418	47.435
19.394	61.8014	63.0404	56.0052	58.7002	67.3596	78.0084	2.75462e-05	0.0021771	0.01076	24.2211	9.81449	10.21	1.18	0.164265	0.997933	40.06
19.404	61.859	63.111	56.0548	58.7628	67.4536	78.1644	2.90971e-05	0.0020734	0.010539	24.0472	9.10054	10.73	1.26	0.157445	0.998657	35.7252
19.414	61.9182	63.1814	56.1044	58.8256	67.5464	78.3196	2.6673e-05	0.0020378	0.010618	23.8754	10.002	10.18	1.45	0.151526	0.998401	37.731
19.424	61.9758	63.2524	56.1532	58.888	67.6386	78.4748	2.55946e-05	0.0020931	0.011012	23.6715	10.8102	10.96	1.61	0.148849	0.998217	39.817
19.434	62.0336	63.3234	56.205	58.9508	67.7326	78.6302	2.69078e-05	0.0022071	0.011632	23.1786	10.8616	12.21	1.73	0.14987	0.99792	39.457
19.444	62.0918	63.3944	56.2546	59.0166	67.8254	78.7804	2.75802e-05	0.0022979	0.012	22.9542	10.932	12.01	1.87	0.150853	0.997818	39.5647
19.454	62.1492	63.4658	56.3044	59.081	67.918	78.9288	2.97517e-05	0.0023499	0.012386	22.4328	10.4601	12.13	2.03	0.149649	0.997803	36.6433
19.464	62.2072	63.5374	56.3562	59.1468	68.0126	79.0828	3.13149e-05	0.0023899	0.012683	22.0738	10.1762	10.51	2.16	0.146857	0.997791	34.383
19.474	62.2656	63.6088	56.4088	59.2138	68.1078	79.2402	2.90893e-05	0.0024524	0.013235	21.596	11.4316	10.55	2.13	0.143871	0.997874	36.9036
19.484	62.3238	63.6804	56.46	59.2812	68.2048	79.3966	3.08684e-05	0.0025417	0.013871	21.3066	11.2904	10.31	2.05	0.140812	0.998164	35.1071
19.494	62.3812	63.7518	56.5132	59.3488	68.301	79.5506	3.06278e-05	0.0026588	0.014608	20.933	11.9837	9.18	1.91	0.13862	0.99825	36.0163
19.504	62.4388	63.8238	56.568	59.4158	68.3968	79.705	3.30573e-05	0.0028072	0.015736	20.7446	11.9604	9.72	1.68	0.133061	0.998549	34.2224
19.514	62.4958	63.8958	56.6204	59.484	68.4926	79.8604	3.35233e-05	0.0029947	0.017305	20.5057	12.9701	9.78	1.45	0.127971	0.99888	35.0026
19.524	62.5528	63.9678	56.6752	59.5532	68.5882	80.0152	3.48146e-05	0.0032427	0.01921	20.646	13.8638	9.75	1.32	0.12183	0.998502	35.8987
19.534	62.6098	64.0402	56.7298	59.6212	68.6854	80.1678	3.85744e-05	0.0036635	0.021481	20.7232	13.9917	9.47	1.26	0.119018	0.998748	35.3991
19.544	62.6672	64.1128	56.788	59.6892	68.7818	80.3206	3.9909e-05	0.0039645	0.024095	20.8633	15.1695	9.1	1.2	0.11816	0.998633	38.4224
19.554	62.7252	64.1848	56.8472	59.758	68.8784	80.4754	4.0808e-05	0.0045314	0.026962	21.1698	16.6006	8.52	1.12	0.119002	0.998799	43.0602
19.564	62.7828	64.2572	56.9056	59.828	68.9752	80.6294	4.16637e-05	0.0049705	0.030016	21.3738	18.1014	8.01	1.04	0.122223	0.998749	48.8387
19.574	62.8402	64.3302	56.963	59.8972	69.0728	80.7796	4.6293e-05	0.0055954	0.032675	21.7856	17.7344	7.23	0.99	0.125107	0.998926	50.0184
19.584	62.8974	64.4032	57.0204	59.9652	69.1702	80.9298	4.74003e-05	0.0060717	0.034754	22	18.4222	7.81	0.98	0.129034	0.999003	54.2359
19.594	62.9538	64.4762	57.0846	60.0344	69.2674	81.0818	4.82777e-05	0.0062866	0.035899	22.2799	18.6833	6.22	1.05	0.136092	0.998311	59.1225
19.604	63.0108	64.5492	57.1512	60.105	69.3634	81.2334	4.78369e-05	0.0063978	0.035984	22.4635	18.9001	11.53	0.96	0.136819	0.999262	60.3969
19.614	63.0678	64.6222	57.2138	60.1746	69.4602	81.3868	4.45221e-05	0.006235	0.034584	22.7804	19.5172	9.45	1.05	0.139457	0.999423	64.514
19.624	63.1248	64.6952	57.2746	60.2444	69.5578	81.5422	4.01127e-05	0.0057861	0.031701	22.968	19.8567	8.53	1.16	0.143066	0.999293	67.6369
19.634	63.1822	64.7686	57.3388	60.3158	69.6548	81.6964	3.21934e-05	0.0050929	0.027884	23.0495	21.7623	9.87	1.33	0.145414	0.999633	75.4036
19.644	63.2394	64.8422	57.4112	60.389	69.7506	81.852	2.38128e-05	0.0042607	0.02358	23.1085	24.88	9.06	1.5	0.147958	0.99952	87.7134
19.654	63.2954	64.9156	57.4842	60.4628	69.8454	82.0078	1.72043e-05	0.0035805	0.019696	23.0004	28.7646	10.73	1.68	0.148569	0.999487	101.463
19.664	63.3518	64.9896	57.5568	60.5352	69.9422	82.1636	1.69911e-05	0.0029867	0.0164	22.7828	24.2515	11.16	2.52	0.142969	0.99941	80.4421
19.674	63.4092	65.0636	57.6272	60.6078	70.0402	82.3184	2.02858e-05	0.0026524	0.014295	22.025	17.7056	16.03	1.98	0.148997	0.99935	59.1991
19.684	63.4676	65.1372	57.6984	60.6798	70.1378	82.4656	2.46916e-05	0.0023454	0.013137	21.4757	13.3679	12.55	2.03	0.147023	0.999399	42.314
19.694	63.5254	65.211	57.7728	60.7526	70.2352	82.604	2.66703e-05	0.0024399	0.013146	20.7478	12.3846	13.15	1.53	0.142016	0.999579	36.947
19.704	63.5822	65.2856	57.8472	60.8258	70.3324	82.7482	2.71332e-05	0.0026147	0.01369	20.3446	12.6771	11.79	1.13	0.143722	0.999578	37.3049
19.714	63.6398	65.3596	57.9232	60.8974	70.4292	82.8948	2.66878e-05	0.0028266	0.014336	19.8822	13.4969	8.63	1.03	0.150636	0.999424	40.4418
19.724	63.6964	65.4336	58.0006	60.9696	70.528	83.0448	2.62411e-05	0.0029411	0.014433	19.8922	13.8195	10.48	1.18	0.156769	0.999517	42.7764
19.734	63.7532	65.508	58.0814	61.0432	70.6272	83.1922	2.66797e-05	0.0028838	0.013962	19.9346	13.1487	7.7	1.38	0.160314	0.99951	41.5335
19.744	63.8108	65.5826	58.1578	61.1154	70.7252	83.341	2.18381e-05	0.0026982	0.012754	20.1262	14.674	8.28	1.52	0.164871	0.999666	47.7652
19.754	63.8682	65.657	58.2352	61.1876	70.8224	83.4878	1.98228e-05	0.0024077	0.011407	20.2068	14.4585	8.27	1.62	0.167577	0.999526	48.0094
19.764	63.9262	65.7316	58.3144	61.2612	70.9192	83.6338	1.67682e-05	0.002076	0.0098289	20.5185	14.7277	8.6	1.71	0.164358	0.999463	48.8847
19.774	63.9842	65.806	58.3954	61.3346	71.0168	83.7854	1.56505e-05	0.0016896	0.0080927	20.6068	12.9922	10.49	1.74	0.165993	0.998876	43.7546
19.784	64.0418	65.881	58.4764	61.4082	71.1146	83.93	1.30024e-05	0.0012672	0.0065311	21.4454	12.6206	15.58	1.86	0.160292	0.998729	42.8482
19.794	64.0988	65.956	58.557	61.4808	71.2132	84.0722	9.24211e-06	0.0011073	0.005629	21.2251	15.303	10.72	2.27	0.153941	0.998386	49.6099
19.804	64.1562	66.0306	58.637	61.5524	71.312	84.2252	9.92646e-06	0.00097874	0.0050992	21.9271	12.907	13.33	3.39	0.141846	0.997679	41.2302
19.814	64.2134	66.105	58.7194	61.6242	71.4112	84.3766	1.34493e-05	0.00093942	0.0049287	21.6858	9.20765	15.15	4.67	0.138777	0.997367	29.2275
19.824	64.2698	66.18	58.8066	61.6968	71.5092	84.5244	1.32398e-05	0.00093541	0.0049232	21.528	9.3429	13.59	5.31	0.136668	0.996901	29.3546
19.834	64.3272	66.255	58.8964	61.7692	71.6072	84.672	1.34329e-05	0.00098815	0.0051549	21.3473	9.64204	17.65	5.38	0.136461	0.996462	30.0763
19.839	64.3562	66.2925	58.9419	61.8057	71.6562	84.747	1.49745e-05	0.00092744	0.005309	21.4652	8.90797	20.76	2.11	0.130199	0.995906	24.0276
19.849	64.4124	66.3684	59.0311	61.8787	71.7542	84.8943	1.62985e-05	0.0010306	0.0053292	21.3354	8.21542	11.97	1.98	0.140398	0.995463	23.6389
19.859	64.4702	66.4435	59.1237	61.9508	71.8522	85.0467	1.45426e-05	0.001239	0.0057872	21.2035	9.99873	11.13	1.57	0.163078	0.996627	33.3607
19.869	64.5273	66.5185	59.2149	62.0228	71.9502	85.1763	1.34376e-05	0.0015561	0.0068269	20.6226	12.765	18.92	1.53	0.186545	0.997953	47.4222
19.879	64.5861	66.5935	59.3068	62.0966	72.0491	85.3213	1.71846e-05	0.0018517	0.0078008	20.9907	11.4056	17.56	1.51	0.196836	0.999094	45.4588
19.889	64.6433	66.6685	59.3952	62.1697	72.149	85.4548	2.13732e-05	0.002033	0.0087174	20.8207	10.2479	17.04	1.86	0.199269	0.999534	41.1613
19.899	64.7003	66.7435	59.4805	62.2427	72.249	85.5823	2.7754e-05	0.0021272	0.0092213	20.6851	8.34803	12.6	2.22	0.201966	0.999317	33.9591
19.909	64.7582	66.8194	59.5673	62.3166	72.3472	85.7084	3.28149e-05	0.0022246	0.0097659	20.8953	7.47753	11.84	2.6	0.198955	0.999563	30.4042
19.919	64.8171	66.8945	59.6597	62.3888	72.4461	85.8407	2.86635e-05	0.0023643	0.010312	20.7409	9.0392	15.11	2.73	0.202348	0.999517	37.1622
19.929	64.8752	66.9695	59.7518	62.4608	72.5433	85.9881	2.68862e-05	0.0024785	0.010669	20.6153	9.97036	13.63	2.73	0.205933	0.999314	41.6235
19.939	64.9332	67.0454	59.8456	62.5337	72.6394	86.1227	2.62112e-05	0.0025174	0.010736	21.0514	10.2913	12.83	2.74	0.203132	0.999249	43.5501
19.949	64.9903	67.1205	59.9351	62.6094	72.739	86.2557	2.81828e-05	0.0024908	0.010819	21.1309	9.64538	9.97	2.73	0.200488	0.999233	40.5353
19.959	65.0491	67.1955	60.0268	62.6827	72.8381	86.3923	3.34959e-05	0.0025209	0.011125	20.957	8.34499	10.45	2.64	0.199085	0.999354	34.5923
19.969	65.1072	67.2714	60.1206	62.7566	72.938	86.532	3.78934e-05	0.0026029	0.011446	21.1243	7.5894	11.31	2.46	0.20018	0.999292	32.0003
19.979	65.1661	67.3465	60.2128	62.8306	73.0353	86.6711	3.65787e-05	0.002749	0.012011	21.1871	8.25026	9.88	2.28	0.202112	0.999509	35.3539
19.989	65.2242	67.4215	60.3102	62.9019	73.1341	86.8119	3.72307e-05	0.0028556	0.012338	21.1639	8.32647	10.78	2.13	0.204563	0.999023	36.4216
19.999	65.2822	67.4974	60.4082	62.9738	73.234	86.9565	3.63435e-05	0.0028437	0.012113	21.3237	8.37417	12.03	2.08	0.207727	0.999399	37.451
20.009	65.3429	67.5725	60.5071	63.0458	73.3322	87.097	3.63642e-05	0.0027011	0.011438	21.5461	7.90301	11.3	1.93	0.206395	0.999243	35.5102
20.019	65.4021	67.6484	60.6061	63.1178	73.4311	87.2433	3.32504e-05	0.0024689	0.010578	21.6451	7.99324	11.18	1.62	0.202733	0.99923	35.3258
20.029	65.462	67.7235	60.7024	63.1889	73.5292	87.3759	3.03875e-05	0.0021809	0.009406	21.6072	7.77726	10.7	1.52	0.201034	0.998676	34.0205
20.039	65.5229	67.7994	60.7975	63.2617	73.6272	87.5159	2.53339e-05	0.0018555	0.0080902	21.773	8.02368	11.23	1.71	0.196642	0.99816	34.7751
20.049	65.583	67.8745	60.8979	63.3347	73.7261	87.6569	2.293e-05	0.0015264	0.006591	21.9187	7.22211	11.6	2.2	0.193919	0.996898	31.3135
20.059	65.6412	67.9495	60.9944	63.4077	73.8242	87.7853	1.87216e-05	0.0012062	0.0053128	22.0745	7.13015	10.58	3.01	0.183432	0.996509	29.7
20.069	65.7019	68.0254	61.0886	63.4798	73.9231	87.9087	1.54213e-05	0.00086989	0.0042208	22.5284	6.87689	10.06	4.2	0.167746	0.994557	27.477
20.079	65.7593	68.1005	61.188	63.5527	74.0212	88.0236	1.34403e-05	0.00071103	0.0034213	22.3541	6.39584	15.46	6.04	0.150462	0.993203	23.8468
20.089	65.8181	68.1755	61.2844	63.6239	74.1201	88.1592	1.34507e-05	0.00056303	0.0027511	21.7449	5.139	20.6	7.3	0.14203	0.982813	18.8213
20.099	65.8771	68.2514	61.3795	63.6949	74.2182	88.2846	9.6835e-06	0.00046158	0.002243	22.8393	5.81988	15.77	7.01	0.130498	0.985773	21.5583
20.109	65.9352	68.3265	61.4772	63.7668	74.3162	88.396	9.70242e-06	0.00040759	0.0020303	21.5329	5.25772	14.38	6.07	0.132047	0.981765	18.8499
20.119	65.9941	68.4015	61.5716	63.8388	74.4142	88.5267	8.81428e-06	0.00040307	0.0019748	22.0672	5.62929	16.05	5.01	0.12843	0.985524	19.8734
20.129	66.0531	68.4774	61.6665	63.909	74.5122	88.6552	9.67854e-06	0.00042862	0.0020642	21.7763	5.35869	19.44	4.38	0.132349	0.987308	18.2455
20.139	66.1139	68.5525	61.7642	63.9817	74.6102	88.7832	1.03583e-05	0.0004644	0.002253	21.3571	5.46498	16.25	3.91	0.138033	0.989758	17.415
20.149	66.1722	68.6275	61.8613	64.052	74.7082	88.9184	1.12277e-05	0.00050372	0.0025014	20.9739	5.5977	19.35	3.49	0.142759	0.992987	16.8868
20.159	66.232	68.7025	61.9619	64.1247	74.8071	89.0481	1.47612e-05	0.00055006	0.0027887	20.4812	4.74675	20.89	3.34	0.144652	0.993711	13.8884
20.169	66.2911	68.7784	62.0557	64.195	74.9061	89.1699	1.43003e-05	0.00059649	0.0031411	19.7375	5.51893	15.47	3.64	0.143432	0.993702	15.4319
20.179	66.3519	68.8535	62.1541	64.2668	75.0042	89.2891	1.56265e-05	0.00062131	0.0032672	19.929	5.25328	16.57	3.9	0.140895	0.993998	14.6322
20.189	66.412	68.9285	62.2468	64.3352	75.1031	89.4225	1.56238e-05	0.0006038	0.0033221	19.7185	5.34248	17.79	4.04	0.136414	0.994464	14.2507
20.199	66.4729	69.0035	62.3388	64.4068	75.2003	89.5476	1.07895e-05	0.0005504	0.0032443	19.4801	7.55506	15.76	4.24	0.129352	0.994332	18.9824
20.209	66.5321	69.0785	62.4353	64.4752	75.2982	89.6779	9.03702e-06	0.00050301	0.0032421	19.1154	9.01401	11.11	4.32	0.119165	0.993106	20.8166
20.219	66.5929	69.1535	62.5287	64.5459	75.398	89.7873	5.49524e-06	0.00056509	0.0037856	17.9579	17.3087	10.67	4.02	0.11045	0.991698	35.1522
20.229	66.6521	69.2285	62.6253	64.616	75.498	89.897	3.93626e-06	0.00086415	0.0051996	17.4271	33.1896	11.24	3.04	0.109313	0.994394	63.3088
20.239	66.7129	69.3035	62.7241	64.6851	75.5971	90.0286	5.4848e-06	0.0014896	0.0082038	16.8404	37.5813	9.73	1.78	0.113388	0.99747	70.1867
20.249	66.773	69.3785	62.8204	64.755	75.6961	90.1509	8.3689e-06	0.0025627	0.013012	16.4605	39.0654	14.93	0.96	0.117501	0.998036	73.5222
20.259	66.833	69.4535	62.9146	64.8259	75.7942	90.2602	1.89348e-05	0.0038204	0.019382	16.5127	25.7191	13.72	0.77	0.121012	0.998165	49.2374
20.269	66.8939	69.5285	63.0086	64.8951	75.8922	90.3673	3.01607e-05	0.0051872	0.02666	16.3582	22.2093	10.9	0.58	0.123073	0.998509	42.688
20.279	66.9549	69.6026	63.1053	64.9632	75.9911	90.4797	4.20882e-05	0.0067608	0.034374	16.4153	20.5204	10.22	0.69	0.125504	0.999037	40.1632
20.289	67.0168	69.6775	63.2014	65.0321	76.0892	90.5783	4.71595e-05	0.0082228	0.04205	16.4161	22.4034	8.76	0.73	0.128404	0.999099	44.8181
20.299	67.0761	69.7525	63.2911	65.102	76.1881	90.7032	5.19925e-05	0.0096019	0.049023	16.4224	23.6906	8.24	1.17	0.13614	0.998395	50.5054
20.309	67.1369	69.8275	63.3846	65.1711	76.2862	90.8321	5.26747e-05	0.010784	0.053997	16.5136	25.7564	9.52	0.75	0.136482	0.999287	54.9068
20.319	67.1979	69.9025	63.4777	65.2392	76.3851	90.9458	5.55371e-05	0.011543	0.05703	16.5296	25.801	6.69	0.68	0.140307	0.999345	56.7152
20.329	67.258	69.9766	63.5689	65.3081	76.4832	91.056	5.6646e-05	0.011674	0.057829	16.5845	25.6504	7.61	0.7	0.142671	0.999401	57.4533
20.339	67.318	70.0515	63.6617	65.3771	76.5848	91.1714	5.41932e-05	0.01148	0.056681	16.6344	26.2791	7.55	0.61	0.143142	0.999444	59.3931
20.349	67.3789	70.1256	63.752	65.4461	76.6832	91.2937	5.33198e-05	0.010803	0.053272	16.6263	25.1031	7.67	0.6	0.143116	0.999293	56.9206
20.359	67.4417	70.2005	63.8411	65.5151	76.783	91.4131	4.95973e-05	0.00949	0.047773	16.6697	24.2015	6.85	0.63	0.142682	0.999476	54.9909
20.369	67.5029	70.2755	63.9301	65.5841	76.883	91.5294	3.96682e-05	0.0079189	0.040731	16.6034	25.7988	7.86	0.75	0.142484	0.999258	58.4827
20.379	67.5657	70.3496	64.0164	65.6522	76.9821	91.6274	2.86357e-05	0.0064043	0.032849	16.6231	28.8224	7.98	0.92	0.142308	0.999563	65.3554
20.389	67.6269	70.4245	64.1006	65.7202	77.0811	91.7432	1.62933e-05	0.0047334	0.024709	16.7842	38.1033	9.39	1.24	0.14079	0.999017	87.5451
20.399	67.6897	70.4986	64.19	65.7891	77.1801	91.8504	1.12181e-05	0.0032067	0.017428	16.8351	39.0342	19.09	2.13	0.118735	0.994423	74.2612
20.409	67.7527	70.5735	64.2737	65.8563	77.2818	91.9681	7.02998e-06	0.0019399	0.011035	17.0132	39.4399	16.07	3.34	0.129892	0.998409	85.3772
20.419	67.8157	70.6476	64.3567	65.9242	77.3802	92.0862	4.1765e-06	0.00092501	0.0063238	16.9713	38.0437	11.56	5.76	0.121162	0.997768	78.8651
20.429	67.8787	70.7216	64.4415	65.9922	77.4782	92.2006	8.89576e-07	0.0004596	0.0032028	18.1498	90.4615	7.2	9.91	0.106681	0.987917	178.962
20.439	67.9435	70.7965	64.5265	66.0602	77.5771	92.3137	1.30134e-06	0.00018823	0.0014874	19.3148	28.718	5.94	17.31	0.0931959	0.944061	56.0508
20.449	68.0049	70.8706	64.6124	66.1255	77.677	92.424	-1.55581e-06	6.7404e-05	0.00072042	19.1847	-11.6345	3.13	29.71	0.0981511	0.87543	-25.5417
20.459	68.0677	70.9446	64.6984	66.1941	77.777	92.525	-2.00123e-06	3.5998e-05	0.00031982	28.0377	-4.01538	0.18	24.61	0.0675931	0.906577	-8.6467
20.469	68.1316	71.0195	64.7799	66.2604	77.8752	92.6268	-9.02781e-07	1.8638e-05	0.00020385	28.8089	-5.67342	-0.18	21	0.0506379	0.868058	-12.6354
20.479	68.1956	71.0936	64.8627	66.3264	77.9732	92.7324	-2.44823e-06	1.352e-05	0.00012699	32.2995	-1.30327	1.68	21.51	0.0195525	0.414042	-4.05689
20.489	68.2578	71.1676	64.9466	66.3933	78.0703	92.8222	-3.76113e-06	1.0422e-05	9.5328e-05	34.4104	-0.636823	2.57	33.29	-0.0219962	-0.385141	-2.29758
20.499	68.3207	71.2416	65.0261	66.4603	78.1691	92.9183	-3.10126e-06	7.679e-06	8.1523e-05	36.3844	-0.660478	4.55	43.06	-0.0171154	-0.287297	-3.10399
20.509	68.3828	71.3165	65.1078	66.5273	78.269	93.0198	-1.76769e-06	6.5723e-06	7.5579e-05	37.4657	-1.07427	14.41	45.84	-0.0436892	-0.56959	-4.92507
20.519	68.4475	71.3906	65.1826	66.5934	78.3672	93.1137	-9.16214e-07	6.5454e-06	7.3307e-05	38.0067	-2.01032	8.29	45.95	-0.0490597	-0.590222	-9.54886
20.529	68.5116	71.4646	65.2629	66.6612	78.467	93.2139	-3.32038e-06	6.9401e-06	7.4345e-05	37.9117	-0.562576	5.7	42.39	-0.0422845	-0.514883	-2.67033
20.539	68.5747	71.5386	65.3376	66.7283	78.5661	93.3131	-3.76564e-06	7.0976e-06	7.8754e-05	37.6645	-0.525473	3.45	38.5	-0.0267789	-0.323468	-2.30646
20.549	68.6386	71.6126	65.4134	66.7944	78.6651	93.4094	-2.01647e-06	6.61e-06	8.8202e-05	37.1036	-1.09902	3.26	35.75	-0.0105365	-0.12159	-3.8562
20.559	68.7017	71.6866	65.4858	66.8595	78.7632	93.518	-2.2048e-06	7.2967e-06	0.00010297	36.4433	-1.17343	11.91	33.45	-0.00782001	-0.0926971	-2.83631
20.569	68.7647	71.7606	65.5596	66.9245	78.8621	93.6217	-3.96236e-06	1.0402e-05	0.00012281	35.7352	-0.778747	10.35	32.83	-0.0137966	-0.215248	-1.39376
20.579	68.8304	71.8346	65.6363	66.9904	78.9638	93.7166	-4.20128e-06	1.4873e-05	0.00014695	35.1743	-0.878829	11.98	33.2	-0.0173936	-0.412777	-1.22627
20.589	68.8946	71.9086	65.7079	67.0564	79.064	93.8187	2.05498e-07	1.7944e-05	0.00017309	34.7897	21.1632	18.9	33.54	-0.0078925	-0.319718	22.8805
20.599	68.9604	71.9826	65.778	67.1197	79.1622	93.9181	-1.55725e-06	1.9169e-05	0.00019548	34.4736	-3.15399	9.14	34.55	0.00100199	0.0277591	-3.08955
20.609	69.0246	72.0566	65.8498	67.1863	79.2629	94.0153	1.08198e-06	1.861e-05	0.00021092	34.1193	4.89797	13.07	32.37	-0.00669125	-0.155134	3.90858
20.619	69.0895	72.1297	65.9245	67.2515	79.3648	94.1285	1.09344e-06	1.8568e-05	0.00021769	33.6341	5.0022	19.01	31.71	-0.00246514	-0.0532057	3.96026
20.629	69.1554	72.2036	65.9959	67.3156	79.4641	94.2273	8.69772e-07	1.7427e-05	0.00021723	33.4524	6.27525	7.58	30.74	0.00968675	0.178924	6.53907
20.639	69.2214	72.2776	66.0669	67.3814	79.5631	94.3252	1.06935e-06	1.3881e-05	0.00021108	32.977	4.95955	18.07	30.41	0.008423	0.159513	5.4329
20.649	69.2874	72.3516	66.1352	67.4474	79.663	94.4223	6.47067e-07	9.2055e-06	0.00019793	32.657	7.68563	15.88	30.69	4.92647e-05	0.00105984	7.18612
20.659	69.3534	72.4256	66.1987	67.5116	79.7648	94.5256	-6.66592e-07	7.0225e-06	0.00017949	32.4105	-6.76546	3.41	31.99	0.00151523	0.0370423	-6.91113
20.734	69.8464	72.9782	66.6716	67.9892	80.517	95.2886	-3.75151e-06	3.8948e-05	0.00029967	30.3788	-2.00703	14.17	35.44	0.0196818	0.891126	-2.72743
20.744	69.9128	73.0516	66.7314	68.0526	80.6178	95.3812	-4.19693e-06	4.1852e-05	0.00034263	29.3825	-2.05121	7.34	35.28	0.016739	0.856887	-2.35582
20.754	69.9794	73.1256	66.7908	68.1162	80.7198	95.4678	-3.97452e-06	4.4272e-05	0.00038229	28.4338	-2.41671	10.01	38.44	0.0184689	0.916233	-2.40011
20.764	70.0458	73.1992	66.8486	68.1792	80.8222	95.5606	-6.37842e-06	4.8196e-05	0.0004117	27.6648	-1.62175	11.54	38.63	0.0213373	0.820631	-1.52232
20.774	70.1128	73.2726	66.9072	68.2426	80.9256	95.653	-4.84105e-06	5.2926e-05	0.00042672	26.9586	-2.21473	14.07	33.57	0.0265011	0.787663	-2.39679
20.784	70.1798	73.3466	66.966	68.3054	81.0288	95.739	-5.93535e-06	5.5319e-05	0.00043093	26.2016	-1.82422	13.68	29.72	0.0311343	0.785937	-2.25345
20.794	70.2468	73.4202	67.0252	68.3668	81.1308	95.8258	-5.28884e-06	5.5381e-05	0.00042501	25.6763	-2.01909	19.63	29.84	0.0323906	0.799521	-2.69322
20.804	70.3174	73.4956	67.0856	68.4312	81.2324	95.9256	-4.40643e-06	5.5224e-05	0.00041087	25.4803	-2.34279	16.55	34.38	0.0324264	0.796545	-3.44837
20.814	70.4062	73.5838	67.1632	68.514	81.3342	96.022	-6.82045e-06	5.6782e-05	0.00039154	25.5026	-1.44238	17.6	34.21	0.0409835	0.816204	-2.60437
20.824	70.5246	73.695	67.2776	68.6318	81.4376	96.1098	-5.49805e-06	6.2238e-05	0.00037732	25.4262	-1.72432	22.18	31.89	0.0586201	0.861733	-3.86319
20.834	70.6606	73.8208	67.4158	68.7688	81.5412	96.2058	-7.03845e-06	6.9062e-05	0.00037451	25.1716	-1.33691	15.82	31.47	0.075719	0.894373	-3.39194
20.844	70.7992	73.9478	67.5508	68.9066	81.6438	96.3106	-6.61965e-06	7.22e-05	0.00037984	24.6583	-1.44172	18.39	31.56	0.0868777	0.914027	-3.73509
20.854	70.9372	74.0748	67.682	69.044	81.7454	96.4112	-6.16882e-06	6.9139e-05	0.00038336	24.0992	-1.56143	21.15	31.3	0.0871208	0.918925	-3.63814
20.864	71.0764	74.2018	67.808	69.179	81.846	96.5036	-4.63108e-06	6.3695e-05	0.0003755	23.8574	-2.03725	15.42	29.57	0.0804066	0.91841	-4.01483
20.874	71.2182	74.3288	67.9296	69.3136	81.9468	96.603	-6.39733e-06	5.9454e-05	0.00036071	23.9576	-1.41669	14.95	26.99	0.0696972	0.907303	-2.51386
20.884	71.3608	74.4558	68.0492	69.4476	82.0484	96.6986	-5.27264e-06	5.7291e-05	0.00035554	23.9743	-1.69425	13.835	23.02	0.0594463	0.861772	-2.81756
20.894	71.5036	74.5828	68.161	69.5808	82.151	96.7876	-6.84005e-06	5.6395e-05	0.000356	23.9073	-1.3077	14.48	19.22	0.0507723	0.808597	-2.06884
20.904	71.6484	74.7098	68.2706	69.7132	82.2564	96.875	-4.85956e-06	5.7152e-05	0.00035892	23.7173	-1.85574	12.98	16.87	0.0405682	0.747145	-2.67061
20.914	71.7932	74.8368	68.3784	69.8442	82.362	96.9668	-5.2672e-06	6.0917e-05	0.00038519	22.9307	-1.83744	14.34	17.56	0.034263	0.712521	-2.29097
20.924	71.9374	74.9638	68.4832	69.9718	82.4658	97.058	-3.9607e-06	7.1359e-05	0.00045152	21.5144	-2.86432	14.91	18.63	0.0342504	0.741822	-3.16106
20.934	72.0826	75.0908	68.587	70.0976	82.5678	97.1362	-4.62374e-06	9.6901e-05	0.00067737	16.3935	-3.68086	11.19	16.3	0.0451589	0.85485	-3.42363
20.944	72.227	75.2178	68.6916	70.2212	82.6694	97.2212	-4.39292e-06	0.00014773	0.00080222	17.5801	-4.58835	5.05	12.01	0.0620857	0.93471	-5.24229
20.954	72.3708	75.3448	68.7924	70.3446	82.7736	97.3112	-4.62374e-06	0.00022594	0.0011221	17.5414	-6.09754	16.05	8.83	0.0805925	0.973941	-7.88647
20.964	72.5136	75.4718	68.8876	70.4678	82.8782	97.4038	-2.62121e-06	0.00034327	0.0017101	16.7739	-16.3922	16.29	6.75	0.0897146	0.991955	-21.7007
20.974	72.6572	75.5988	68.9816	70.5914	82.9766	97.4918	6.565e-07	0.00049449	0.0025329	14.9738	96.9393	17.34	6.18	0.0984758	0.992507	126.969
20.984	72.8018	75.7258	69.0768	70.7138	83.0764	97.5738	4.18477e-06	0.00067065	0.0033412	15.3714	20.0608	15.24	5.94	0.10196	0.993743	27.483
20.994	72.9472	75.8528	69.1722	70.832	83.1786	97.6578	4.20482e-06	0.00087104	0.0044081	14.8447	26.3403	10.26	5.59	0.103123	0.995818	35.7257
21.004	73.091	75.9798	69.2648	70.9512	83.2822	97.744	6.61085e-06	0.0010705	0.0053644	14.9799	20.3883	9.72	5.06	0.105281	0.996435	28.5258
21.014	73.2356	76.1068	69.3548	71.0696	83.386	97.8274	4.63615e-06	0.0012672	0.0064572	14.8082	34.9948	10.77	4.59	0.108952	0.996597	49.1916
21.024	73.3792	76.2338	69.4422	71.1882	83.491	97.9132	6.59736e-06	0.0014418	0.0073965	14.5222	28.1691	9.72	4.11	0.110177	0.997215	39.9402
21.034	73.5218	76.3608	69.5302	71.3046	83.5956	97.9998	7.05841e-06	0.0015741	0.0080422	14.4334	28.6276	10.08	3.69	0.114363	0.996773	41.4201
21.044	73.6638	76.4878	69.617	71.4186	83.6996	98.082	6.84281e-06	0.00167	0.0084537	14.452	31.0405	9.37	3.31	0.115536	0.9976	45.8014
21.054	73.8062	76.6148	69.7016	71.533	83.8048	98.1696	5.74915e-06	0.001728	0.0087907	14.4822	38.4181	10.01	2.97	0.119162	0.997801	57.5041
21.064	73.9492	76.7418	69.7876	71.648	83.9106	98.256	5.96431e-06	0.0017795	0.0088602	14.5071	37.325	8.74	2.78	0.122724	0.997888	57.6345
21.074	74.0914	76.8688	69.8754	71.761	84.0174	98.346	7.49843e-06	0.0017769	0.0088476	14.4815	29.6464	8.79	2.68	0.1256	0.997917	46.8005
21.084	74.2336	76.9958	69.9578	71.8726	84.1264	98.4336	6.85461e-06	0.0017158	0.0086465	14.4672	31.6938	9.4	2.63	0.126996	0.997918	50.6287
21.094	74.378	77.1228	70.0348	71.985	84.2328	98.5244	4.85348e-06	0.0016019	0.0082071	14.4939	42.4868	9.07	2.63	0.126942	0.998089	68.0996
21.104	74.5218	77.2498	70.1138	72.0962	84.3418	98.623	4.19389e-06	0.001442	0.0075341	14.5889	45.1368	8.36	2.7	0.124926	0.998306	72.379
21.114	74.6642	77.3768	70.1938	72.2088	84.4518	98.7132	2.42198e-06	0.0012727	0.0067919	14.6146	70.4591	8.07	2.93	0.122489	0.998289	111.896
21.124	74.8076	77.5038	70.2724	72.3204	84.5596	98.7974	-6.52752e-07	0.001111	0.0058414	14.6283	-224.846	9.66	3.27	0.121149	0.998071	-365.361
21.134	74.9508	77.6308	70.3542	72.4326	84.6698	98.8822	-2.6297e-06	0.00096422	0.0050802	14.7608	-48.539	8.54	4.13	0.120029	0.997764	-78.7199
21.144	75.0932	77.7578	70.436	72.5442	84.7826	98.964	-2.40436e-06	0.00085162	0.0043629	14.8753	-45.5925	18.7	5.59	0.11928	0.997692	-75.176
21.154	75.2366	77.8848	70.5152	72.6534	84.8974	99.0496	-2.65716e-06	0.00074709	0.0038476	15.0967	-36.3822	12.87	7.24	0.116827	0.9983	-59.6802
21.164	75.3798	78.0118	70.594	72.7624	85.0106	99.1396	-8.61955e-07	0.00069194	0.0035342	14.8361	-103.02	12.81	8.78	0.119671	0.99628	-166.934
21.174	75.5214	78.1392	70.6748	72.8696	85.1236	99.2244	4.36897e-07	0.00067315	0.003531	15.1635	203.065	13.6	9.42	0.110622	0.998186	313.186
21.184	75.664	78.2668	70.756	72.9794	85.2402	99.3052	1.09963e-06	0.00069152	0.0035648	15.3183	81.453	12.47	9.27	0.10965	0.997973	126.216
21.194	75.8082	78.3938	70.8344	73.0884	85.3548	99.3766	2.29428e-09	0.00073061	0.003668	15.465	40169.8	11.03	8.54	0.113087	0.998007	64904.8
21.204	75.9508	78.5208	70.9092	73.194	85.471	99.4524	8.9002e-07	0.00076404	0.0037588	15.6886	106.112	12.26	7.2	0.117536	0.998355	178.85
21.214	76.0932	78.6478	70.985	73.299	85.5864	99.5388	1.77586e-06	0.00077279	0.0037953	15.9723	53.6975	13.42	5.69	0.120825	0.998486	93.1604
21.224	76.2358	78.7752	71.063	73.4044	85.704	99.625	6.42991e-07	0.00077762	0.0037833	16.3578	147.837	12.7	4.72	0.123615	0.997958	266.302
21.234	76.3782	78.9028	71.1384	73.51	85.8236	99.7108	5.74915e-06	0.00080967	0.0038191	16.7878	16.6907	14.53	4.37	0.127844	0.997003	32.1143
21.244	76.5216	79.0298	71.2156	73.615	85.9422	99.7958	5.52104e-06	0.00087214	0.0040148	17.1555	18.2709	14.5	4.2	0.131813	0.996258	37.339
21.254	76.6652	79.1572	71.2934	73.7192	86.0618	99.8738	8.15846e-06	0.00094845	0.0044202	17.0249	13.6129	13.18	4.02	0.134815	0.996056	28.3558
21.264	76.8082	79.2848	71.367	73.8218	86.1866	99.9482	1.25648e-05	0.0010297	0.0046419	17.654	9.28233	12.53	3.75	0.135581	0.99663	20.3744
21.274	76.9516	79.4118	71.4382	73.925	86.3148	100.034	8.40071e-06	0.0010904	0.0049666	17.1874	14.8546	9	3.58	0.139896	0.994952	32.239
21.284	77.096	79.5392	71.5112	74.0312	86.439	100.128	6.59948e-06	0.0011127	0.0051007	17.2797	19.4195	9.79	3.4	0.138835	0.99406	41.9261
21.294	77.2402	79.6668	71.5842	74.1376	86.5602	100.211	7.06651e-06	0.0010874	0.0051235	17.1813	18.2171	8.47	3.38	0.136623	0.993657	38.3272
21.304	77.3828	79.7938	71.6596	74.2408	86.6896	100.292	7.27952e-06	0.0010116	0.0048774	17.0702	16.8346	8.9	3.61	0.135102	0.993183	34.6204
21.314	77.5248	79.9212	71.7358	74.3432	86.8258	100.375	4.43499e-06	0.00090091	0.0044769	16.9772	25.3631	8.16	4.14	0.129792	0.991431	49.6461
21.324	77.6672	80.0488	71.8094	74.4462	86.9586	100.456	3.33821e-06	0.00080647	0.0040534	17.2141	30.5086	8.57	4.98	0.120783	0.988093	56.5212
21.334	77.811	80.1762	71.8846	74.5492	87.0922	100.537	5.52104e-06	0.00077503	0.0039708	16.8997	18.0707	13.97	5.86	0.112593	0.985889	30.5196
21.344	77.956	80.3038	71.957	74.6518	87.2272	100.617	6.60269e-06	0.00082133	0.0041325	16.7612	15.7257	10.02	6.16	0.107627	0.986368	25.0686
21.354	78.1006	80.4308	72.029	74.7534	87.3648	100.697	8.60118e-06	0.00094073	0.0046687	16.5338	13.6381	11.78	5.82	0.105259	0.98955	20.9041
21.364	78.243	80.5582	72.104	74.8552	87.4998	100.78	9.0412e-06	0.0011171	0.0057294	16.1845	15.9221	11.28	5.33	0.105572	0.992955	23.3343
21.374	78.3838	80.6858	72.1774	74.9578	87.635	100.866	1.3656e-05	0.0013289	0.006884	15.6388	12.6658	11.01	5.01	0.10481	0.995693	18.5479
21.384	78.527	80.8132	72.2488	75.0594	87.7746	100.957	1.32457e-05	0.0015745	0.0081258	15.6542	15.4137	13.72	4.55	0.109393	0.995274	22.7953
21.394	78.6708	80.9412	72.32	75.1612	87.9156	101.043	1.74024e-05	0.0019133	0.0092939	15.5352	13.4185	11.37	3.95	0.111345	0.996462	20.4351
21.404	78.8132	81.0688	72.3916	75.2626	88.0588	101.128	1.52048e-05	0.0020361	0.010144	15.5534	16.7627	9.8	3.51	0.116669	0.995943	26.3166
21.414	78.9558	81.1962	72.4652	75.3616	88.2012	101.212	1.45583e-05	0.0021689	0.010801	15.5329	18.641	11.35	3.2	0.12001	0.995623	29.6153
21.424	79.0982	81.3238	72.537	75.461	88.3442	101.299	1.54566e-05	0.0022486	0.011239	15.3087	18.2696	10.06	2.91	0.119895	0.996129	29.0594
21.434	79.2408	81.4512	72.6086	75.5614	88.4856	101.38	1.54256e-05	0.0023204	0.011643	15.4037	18.9644	10.85	2.74	0.120336	0.99637	29.9554
21.444	79.3832	81.5792	72.681	75.662	88.627	101.466	1.69704e-05	0.0024232	0.012075	15.4622	17.8777	11.94	2.6	0.120412	0.996523	28.2463
21.454	79.5274	81.7068	72.753	75.7616	88.7724	101.553	1.52204e-05	0.0026781	0.013104	15.0419	21.6319	12.91	2.47	0.118572	0.997407	33.5517
21.464	79.6726	81.8342	72.8276	75.861	88.9176	101.641	1.78649e-05	0.0028681	0.014376	15.1368	20.2188	10.8	2.25	0.115921	0.997437	31.1147
21.474	79.8158	81.9622	72.9004	75.9602	89.0644	101.731	1.89795e-05	0.0032355	0.016195	15.2054	21.4394	11.11	2.08	0.118321	0.997484	32.8002
21.484	79.9574	82.0898	72.971	76.0586	89.2094	101.818	2.02715e-05	0.0038001	0.018564	15.1195	23.0092	10.76	1.93	0.115949	0.99831	35.0181
21.494	80.1	82.2172	73.041	76.1576	89.3506	101.904	2.55852e-05	0.0044042	0.021345	15.0697	20.9616	10.03	1.8	0.117678	0.998072	32.135
21.504	80.2446	82.3452	73.1114	76.2566	89.5	101.987	2.79983e-05	0.0048735	0.024258	15.0218	21.7691	7.86	1.7	0.119381	0.998665	34.035
21.514	80.3882	82.4728	73.18	76.3568	89.6488	102.073	3.1321e-05	0.005426	0.026698	15.0521	21.4171	9.93	1.5	0.122441	0.999025	34.2198
21.524	80.5304	82.6002	73.2474	76.458	89.793	102.163	3.06508e-05	0.0056945	0.028465	15.1046	23.3338	7.2	1.47	0.12642	0.999216	38.5014
21.534	80.6714	82.7282	73.318	76.5576	89.9366	102.251	2.97438e-05	0.0058954	0.02942	15.1094	24.8521	7.38	1.3	0.129526	0.998981	41.8609
21.544	80.8132	82.8562	73.3884	76.6566	90.0888	102.34	2.4909e-05	0.0059064	0.029393	15.1508	29.6487	8.25	1.21	0.131738	0.99916	51.1904
21.554	80.9558	82.9838	73.4586	76.7556	90.2438	102.422	1.96368e-05	0.005767	0.028531	15.2385	36.5059	6.86	1.14	0.134866	0.999412	64.6031
21.559	81.0268	83.0473	73.4931	76.8051	90.3198	102.46	2.29321e-05	0.0048852	0.027625	15.0711	30.2674	8.43	0.89	0.144759	0.998992	57.6135
21.569	81.1697	83.1752	73.5657	76.9059	90.4691	102.541	1.30052e-05	0.0042608	0.024878	15.2055	48.0636	8.51	0.95	0.142094	0.999061	90.91
21.579	81.31	83.3032	73.6333	77.0033	90.619	102.64	1.2122e-05	0.0037894	0.022452	15.2554	46.5371	8.44	0.98	0.137708	0.999192	85.9845
21.589	81.4545	83.4312	73.7048	77.1021	90.7789	102.727	1.10106e-05	0.0032976	0.020436	15.3804	46.634	8.79	1.04	0.132675	0.99875	83.8874
21.599	81.5977	83.5583	73.775	77.2002	90.9309	102.806	1.14484e-05	0.003052	0.019093	15.2143	41.9033	10.19	1.17	0.128954	0.998806	72.9126
21.609	81.7434	83.6862	73.8441	77.3009	91.0873	102.885	7.4887e-06	0.0028788	0.018386	15.3415	61.6876	10.31	1.31	0.124304	0.997961	103.123
21.619	81.8822	83.8142	73.9113	77.4001	91.2425	102.972	9.253e-06	0.0028119	0.018141	15.3286	49.2601	10.04	1.46	0.120162	0.998132	80.1707
21.629	82.0247	83.9422	73.9828	77.4991	91.3975	103.061	6.81674e-06	0.0028273	0.018338	15.2419	67.5915	10.23	1.54	0.118765	0.997866	107.757
21.639	82.1659	84.0693	74.0539	77.5963	91.5435	103.142	7.2763e-06	0.0028799	0.01867	15.2133	64.469	10.58	1.61	0.118616	0.9977	102.108
21.649	82.3078	84.1972	74.1213	77.696	91.6948	103.24	8.15345e-06	0.0029542	0.019086	15.1266	58.8153	10.465	1.76	0.119416	0.997566	92.8736
21.659	82.4498	84.3252	74.1865	77.796	91.8405	103.335	7.50157e-06	0.003004	0.019155	15.1775	64.1575	11.5	1.84	0.120368	0.997467	102.121
21.669	82.5945	84.4532	74.2542	77.8933	91.9864	103.43	1.14484e-05	0.0029923	0.018968	15.1944	41.6287	12.78	1.83	0.121002	0.997342	66.459
21.679	82.7359	84.5803	74.3231	77.9912	92.1432	103.519	1.14699e-05	0.0028977	0.018249	15.2861	39.9757	12.56	1.83	0.121302	0.997352	64.0441
21.689	82.8787	84.7082	74.3921	78.0901	92.2967	103.61	1.03488e-05	0.0027203	0.017046	15.2941	41.3856	13.72	1.94	0.120151	0.996932	66.3961
21.699	83.0226	84.8353	74.4656	78.1909	92.4407	103.698	7.29179e-06	0.0024201	0.015571	15.1469	53.6536	15.07	2.05	0.120571	0.996166	85.5057
21.709	83.1666	84.9632	74.5369	78.2892	92.5981	103.784	1.05818e-05	0.0022269	0.013792	15.3342	32.7481	15.52	2.19	0.120552	0.996115	52.0499
21.719	83.3097	85.0903	74.6061	78.3854	92.7445	103.878	1.0778e-05	0.0019776	0.012105	15.3504	28.2191	15.23	2.19	0.119861	0.995089	44.6307
21.729	83.4527	85.2182	74.6733	78.4859	92.894	103.964	2.63493e-06	0.0016518	0.010614	14.9995	101.211	14.48	2.33	0.117494	0.993683	154.683
21.739	83.5984	85.3453	74.7412	78.5833	93.0476	104.05	5.94803e-06	0.0014745	0.0090576	15.1579	38.261	15.01	2.24	0.112366	0.989306	56.6137
21.749	83.7426	85.4732	74.8101	78.6821	93.1953	104.153	1.97084e-06	0.0012384	0.0077989	15.0435	99.4258	12.09	2.44	0.101821	0.986764	135.024
21.759	83.8848	85.6003	74.8782	78.7793	93.3423	104.233	-6.4902e-07	0.0010326	0.0066735	14.9653	-258.352	12.3	2.52	0.0948985	0.977252	-316.261
21.819	84.7427	86.3633	75.3033	79.3651	94.2476	104.793	5.93713e-06	0.0015016	0.0085007	14.2742	35.9745	14.56	3.19	0.104062	0.992318	45.8976
21.829	84.8848	86.4894	75.3658	79.4623	94.3998	104.88	6.59597e-06	0.0015851	0.0088841	14.1096	33.8416	14.4	3.13	0.107793	0.990854	43.3765
21.839	85.0295	86.6163	75.4323	79.5593	94.5419	104.961	3.06135e-06	0.001597	0.0088515	14.1161	72.6475	13.11	3.07	0.108046	0.990321	93.5828
21.849	85.1727	86.7433	75.4966	79.6581	94.6937	105.053	7.721e-06	0.0015435	0.008584	14.0675	27.934	11.51	3.03	0.107818	0.990477	35.7169
21.859	85.3184	86.8694	75.5633	79.7562	94.844	105.153	3.28224e-06	0.0014308	0.0080564	14.0244	61.6719	11.91	3.03	0.107366	0.990974	77.9193
21.869	85.4626	86.9963	75.6339	79.856	94.9859	105.254	5.06671e-06	0.0012696	0.0070933	14.189	35.1754	12.87	3.07	0.106527	0.991133	45.0174
21.879	85.6048	87.1224	75.7022	79.9542	95.1305	105.346	-2.20973e-07	0.0010915	0.0061966	13.9989	-704.581	13.39	3.1	0.105734	0.991491	-892.507
21.889	85.7459	87.2484	75.772	80.054	95.2773	105.425	1.10023e-06	0.00090997	0.0051364	14.2813	117.298	13.54	3.11	0.105226	0.991436	151.786
21.899	85.8896	87.3744	75.8411	80.154	95.4297	105.518	6.53665e-07	0.00074468	0.0041883	14.4978	160.99	12.39	3.18	0.103775	0.991167	211.056
21.909	86.0327	87.5004	75.911	80.2504	95.5773	105.611	-1.54723e-06	0.00058977	0.0033887	14.2212	-55.0295	14.77	3.57	0.100469	0.990865	-70.9527
21.919	86.1775	87.6264	75.9792	80.3482	95.7261	105.711	-1.55454e-06	0.00044133	0.0026386	14.5878	-42.647	15.57	4.4	0.0965905	0.987996	-53.8242
21.929	86.3216	87.7515	76.0436	80.4462	95.8769	105.808	1.74749e-06	0.00032409	0.0020332	15.3648	29.2336	15.95	5.53	0.0901715	0.984837	35.2826
21.939	86.4665	87.8774	76.1094	80.5433	96.0261	105.912	-4.85291e-06	0.00024867	0.0017182	14.6169	-8.89586	16.28	6.28	0.082446	0.982967	-9.64884
21.949	86.6088	88.0025	76.179	80.6421	96.1706	106.01	-1.0902e-06	0.00020628	0.0014043	15.187	-32.3645	16.11	7.45	0.0784222	0.968105	-34.9357
21.959	86.7508	88.1275	76.2526	80.7384	96.3029	106.103	-5.73294e-06	0.0001738	0.0012055	14.9258	-5.28332	20.87	9.53	0.0688395	0.951226	-5.49823
21.969	86.8928	88.2525	76.3248	80.8371	96.4429	106.201	8.65572e-07	0.00014136	0.0010068	14.7026	29.2252	21.68	11.39	0.0615973	0.930279	29.8774
21.979	87.0348	88.3775	76.3923	80.9325	96.5821	106.304	-3.09814e-06	0.00010989	0.00081952	16.525	-6.64622	23.35	13.35	0.0526737	0.887598	-6.4926
21.989	87.1786	88.5025	76.4638	81.0311	96.7211	106.392	-3.32813e-06	8.6291e-05	0.00068687	17.1144	-5.18551	17.57	14.74	0.044942	0.824109	-5.06952
21.999	87.3217	88.6266	76.5349	81.1292	96.8592	106.486	-3.55453e-06	7.2495e-05	0.00061887	17.5722	-4.37456	19.73	15.26	0.0381996	0.750455	-4.35585
22.009	87.4647	88.7515	76.605	81.2281	96.9945	106.578	-3.09461e-06	6.4684e-05	0.00055103	18.7922	-4.4739	17.3	16.12	0.0380039	0.734267	-4.97446
22.019	87.6077	88.8756	76.6804	81.3253	97.1376	106.667	-3.77264e-06	5.9851e-05	0.00052151	19.3705	-3.47323	16.76	18.25	0.0365976	0.723735	-4.07672
22.029	87.7507	88.9996	76.7501	81.4223	97.2735	106.753	-1.99456e-06	6.0399e-05	0.00051856	19.8726	-6.53235	18.15	19.92	0.0324453	0.683223	-7.84736
22.039	87.8928	89.1236	76.8236	81.5184	97.4094	106.848	-4.61847e-06	6.7178e-05	0.00055821	19.9907	-3.0368	24.08	20	0.0278855	0.618149	-3.5986
22.049	88.0366	89.2467	76.8967	81.6171	97.5454	106.94	-2.86918e-06	7.7053e-05	0.00062458	19.6347	-5.46949	21.05	18.7	0.0288361	0.605653	-6.40636
22.059	88.1797	89.3706	76.9679	81.7161	97.6724	107.032	-4.86279e-06	8.4554e-05	0.00067921	19.5589	-3.50942	27.31	17.3	0.0289094	0.597564	-3.90619
22.069	88.32	89.4937	77.038	81.8169	97.811	107.126	-6.73585e-07	8.6311e-05	0.00071415	19.5721	-26.6388	24.63	17.18	0.0265853	0.576487	-26.9469
22.079	88.4627	89.6167	77.1053	81.9152	97.9393	107.218	-6.20002e-06	8.364e-05	0.00072729	19.7345	-2.94735	20.46	17.9	0.024459	0.580358	-2.71418
22.089	88.603	89.7397	77.1804	82.015	98.0726	107.304	-1.551e-06	7.8522e-05	0.00071887	19.9981	-11.6454	19	17.73	0.0240113	0.581738	-10.4481
22.099	88.7457	89.8618	77.2528	82.1123	98.203	107.39	-5.07199e-06	7.2461e-05	0.00070022	20.4088	-3.46875	14.46	17.85	0.0306422	0.729223	-3.48108
22.109	88.8887	89.9847	77.3248	82.2093	98.3366	107.479	-6.357e-09	7.3006e-05	0.00068577	20.6691	-2710.46	15.04	16.69	0.048756	0.930343	-3647.95
22.119	89.0299	90.1068	77.3923	82.3099	98.4643	107.557	-6.17568e-06	8.5352e-05	0.00070266	20.185	-2.85876	16.2	13.6	0.063541	0.961255	-5.85377
22.129	89.1709	90.2288	77.4593	82.41	98.5958	107.643	-7.2829e-06	0.00010936	0.0008072	18.8875	-2.7848	23.42	9.52	0.071043	0.968362	-6.86608
22.139	89.3146	90.3508	77.5254	82.5082	98.7215	107.729	-2.21997e-06	0.00015543	0.0010731	17.2242	-12.1454	19.58	6.6	0.0739501	0.974214	-27.2513
22.149	89.4541	90.4719	77.5914	82.608	98.8537	107.81	-1.12521e-06	0.00024485	0.0016392	15.013	-36.6028	16.6	5.44	0.0788574	0.979579	-65.4196
22.159	89.5958	90.5938	77.6583	82.7062	98.9867	107.902	3.96389e-06	0.00037946	0.0023738	14.4912	15.0466	15.54	4.48	0.0858005	0.984578	23.7222
22.169	89.7387	90.7149	77.7253	82.8042	99.1152	107.996	5.47973e-06	0.00054609	0.0034499	14.4437	15.8185	19.57	3.9	0.090125	0.987506	21.6927
22.179	89.8808	90.8359	77.7941	82.9031	99.2459	108.088	7.48341e-06	0.00073079	0.0046372	14.3619	15.5695	13.33	3.64	0.089088	0.990087	19.2974
22.189	90.0219	90.9569	77.8604	83.003	99.3742	108.177	6.37315e-06	0.00094672	0.0060087	14.2005	23.6888	14.49	3.36	0.0908389	0.989063	27.2063
22.199	90.1611	91.077	77.9264	83.1039	99.4968	108.268	5.03433e-06	0.001202	0.0076616	14.0129	38.238	12.43	2.79	0.0895782	0.990921	40.8436
22.209	90.3055	91.1979	77.9924	83.2031	99.6251	108.357	5.93242e-06	0.0015101	0.0094855	13.9593	40.174	11.61	2.09	0.0909832	0.991884	42.4312
22.219	90.4478	91.318	78.0602	83.3012	99.755	108.441	6.81936e-06	0.0019282	0.011389	14.0413	41.9622	13.055	1.66	0.0920708	0.992573	44.4675
22.229	90.5889	91.438	78.1336	83.401	99.8832	108.522	8.36679e-06	0.0021489	0.013293	13.9276	39.9191	12.44	1.43	0.0949817	0.991891	42.6962
22.239	90.7299	91.5571	78.204	83.5001	100.009	108.607	1.09963e-05	0.0024242	0.01509	13.9242	34.4795	12.91	1.31	0.0947	0.993559	37.169
22.249	90.8745	91.677	78.2722	83.5982	100.131	108.702	1.01324e-05	0.0026843	0.016782	13.8684	41.615	9.37	1.22	0.0959175	0.994282	45.2639
22.259	91.0159	91.7961	78.3429	83.6962	100.259	108.797	9.68426e-06	0.0029397	0.018208	13.8822	47.2403	9.74	1.38	0.0979032	0.993949	52.1558
22.269	91.1551	91.916	78.4103	83.796	100.379	108.886	1.18979e-05	0.0031376	0.019405	13.9087	40.9788	10.23	1.68	0.0987948	0.994518	45.7222
22.279	91.2941	92.0351	78.4737	83.8942	100.502	108.975	1.07952e-05	0.0032921	0.020122	13.9284	46.8337	12.37	2.01	0.100113	0.993718	52.8078
22.289	91.4358	92.1532	78.5412	83.9931	100.62	109.057	1.38807e-05	0.003377	0.020513	13.869	37.1308	8.45	2.48	0.101195	0.994085	42.1181
22.299	91.5778	92.2721	78.6092	84.0921	100.745	109.146	1.29866e-05	0.0034082	0.020457	13.8824	39.579	9.43	3.06	0.10215	0.99378	45.3808
22.309	91.7162	92.3902	78.6835	84.192	100.866	109.223	1.32011e-05	0.0033864	0.02011	13.869	38.2752	8.62	3.56	0.103558	0.993455	44.2947
22.319	91.8578	92.5091	78.7513	84.2911	100.988	109.305	1.07897e-05	0.0032964	0.019342	13.9096	45.041	9.03	3.89	0.104837	0.993178	52.79
22.329	91.9998	92.6272	78.8201	84.3919	101.107	109.391	1.0135e-05	0.0031409	0.018233	13.8575	45.2013	8.9	4.07	0.10588	0.992882	53.6319
22.339	92.1418	92.7452	78.8909	84.4929	101.226	109.476	1.27867e-05	0.0029173	0.016891	13.8765	33.1906	9.4	4.35	0.106357	0.992585	39.6468
22.349	92.2811	92.8632	78.9592	84.5939	101.342	109.565	8.81297e-06	0.0026623	0.015357	13.8741	43.7826	9.46	4.5	0.109663	0.991206	52.964
22.359	92.4228	92.9803	79.0254	84.6922	101.458	109.653	7.68517e-06	0.0023872	0.013647	13.9663	44.617	10.03	4.18	0.110228	0.991911	55.3677
22.369	92.563	93.0982	79.0923	84.792	101.578	109.747	3.94689e-06	0.0021217	0.012078	14.0853	76.8877	9.8	3.4	0.11366	0.99065	97.4337
22.379	92.6985	93.2162	79.1602	84.892	101.691	109.832	1.51945e-06	0.0018807	0.010756	14.1218	177.861	10.68	2.62	0.113103	0.992092	228.385
22.389	92.8353	93.3333	79.23	84.9893	101.808	109.911	1.96219e-06	0.0016451	0.0096321	14.3456	123.338	9.49	2.2	0.11388	0.992724	161.391
22.399	92.9768	93.4503	79.2973	85.0863	101.923	110.002	1.30212e-06	0.0015104	0.0089035	14.3156	171.802	9.92	2.03	0.114207	0.993516	228.651
22.409	93.1188	93.5673	79.3679	85.1869	102.039	110.096	2.19293e-06	0.00145	0.0084507	14.4703	96.8246	9.68	2.04	0.115764	0.994183	132.927
22.419	93.2572	93.6843	79.4371	85.2888	102.148	110.188	2.02859e-07	0.0014458	0.0083272	14.4577	1031.39	10.3	2.03	0.117885	0.994684	1448.35
22.429	93.3961	93.8013	79.5079	85.3899	102.264	110.272	3.73851e-06	0.0014638	0.0083005	14.4878	55.7857	9.49	1.99	0.119491	0.995073	80.0265
22.439	93.5351	93.9183	79.5825	85.4909	102.378	110.357	3.07578e-06	0.0014804	0.0083422	14.5148	68.1463	10.59	1.89	0.119963	0.995089	98.7294
22.449	93.6759	94.0353	79.6512	85.5955	102.492	110.442	2.85231e-06	0.0014871	0.0083853	14.5331	73.8651	10.19	1.75	0.119848	0.99476	107.797
22.459	93.8133	94.1523	79.7129	85.6969	102.609	110.536	1.96399e-06	0.0014833	0.0083981	14.5473	107.438	11.74	1.55	0.11985	0.994236	157.933
22.469	93.9512	94.2693	79.7811	85.7961	102.725	110.636	-4.49063e-07	0.0014696	0.0083874	14.568	-469.285	11.475	1.4	0.119501	0.993703	-692.063
22.479	94.0883	94.3854	79.8483	85.8996	102.837	110.722	5.04849e-06	0.0014505	0.0083692	14.5946	41.6524	11.44	1.3	0.118542	0.993168	61.4085
22.489	94.2262	94.5023	79.9117	86	102.952	110.807	1.51035e-06	0.0014328	0.008374	14.6315	139.307	11.12	1.32	0.116927	0.992558	204.761
22.499	94.3642	94.6193	79.9801	86.1045	103.068	110.897	-6.69907e-07	0.0014239	0.0084867	14.6766	-318.303	12.33	1.44	0.114554	0.992111	-463.318
22.509	94.5031	94.7354	80.0482	86.2086	103.18	110.991	4.86559e-06	0.0014459	0.0087536	14.7606	45.2031	12.2	1.62	0.111024	0.991954	64.8863
22.519	94.6457	94.8523	80.1135	86.3099	103.293	111.081	5.25499e-06	0.0014984	0.0092988	14.7773	44.4603	11.6	1.8	0.107375	0.991567	62.0858
22.529	94.786	94.9693	80.1776	86.4136	103.406	111.172	4.60036e-06	0.0015534	0.0098418	15.06	53.7526	12.22	1.9	0.102504	0.991542	73.2486
22.539	94.9233	95.0854	80.2434	86.5194	103.514	111.258	2.86382e-06	0.0015664	0.010236	15.2162	89.8053	13.08	2	0.0962081	0.990849	118.401
22.549	95.0603	95.2023	80.3067	86.6227	103.63	111.347	8.13075e-06	0.0015242	0.010463	15.3133	32.3327	12.68	2.25	0.0901021	0.990396	40.5375
22.559	95.2009	95.3193	80.376	86.7248	103.741	111.438	1.12277e-05	0.0014387	0.010133	15.6651	22.6759	12.83	2.66	0.0847916	0.987096	27.7261
22.569	95.3383	95.4363	80.4397	86.8304	103.851	111.522	6.17142e-06	0.0013423	0.0096934	16.1418	39.4646	13.6	3.09	0.0788687	0.983718	46.9195
22.579	95.4771	95.5533	80.5072	86.9373	103.966	111.609	1.14288e-05	0.0012787	0.009565	16.333	21.0282	18.11	3.36	0.0744065	0.979634	24.2353
22.579	95.4771	95.5533	80.5072	86.9373	103.966	111.609	1.03494e-05	0.0015588	0.0080511	15.6516	19.5459	18.11	2.17	0.106281	0.99287	28.9302
22.589	95.6143	95.6703	80.577	87.0371	104.076	111.694	1.25441e-05	0.0013383	0.0073824	16.3941	14.7868	13.29	2.76	0.09525	0.987643	20.9238
22.599	95.754	95.7873	80.6479	87.146	104.186	111.777	1.63032e-05	0.0011084	0.0067377	17.4079	10.3838	14.59	3.69	0.0833425	0.981208	13.9249
22.609	95.8904	95.9043	80.7162	87.2515	104.298	111.861	2.1578e-05	0.00090029	0.0062201	18.6604	7.24274	13.93	4.78	0.0714218	0.974194	9.05366
22.619	96.0291	96.0213	80.7923	87.3565	104.412	111.947	2.49052e-05	0.00067662	0.0059456	19.9342	5.99822	13.47	5.64	0.0621927	0.9676	7.06881
22.629	96.1672	96.1392	80.863	87.4633	104.525	112.035	2.50955e-05	0.00075689	0.0062481	20.9051	6.25561	12.36	5.69	0.0576954	0.969174	7.22122
22.639	96.3052	96.2563	80.9357	87.5766	104.637	112.13	1.78568e-05	0.00091133	0.007209	19.7196	10.1435	12.87	4.72	0.0627192	0.973455	12.1125
22.649	96.445	96.3742	81.0069	87.6888	104.748	112.217	1.78405e-05	0.0012153	0.008924	18.7935	12.5681	14.435	3.46	0.0700422	0.986268	15.6088
22.659	96.5859	96.4922	81.0725	87.7999	104.859	112.303	1.56426e-05	0.0015963	0.010906	18.0592	17.5175	14.1	2.55	0.0773253	0.99168	22.7749
22.669	96.7215	96.6093	81.1456	87.9082	104.967	112.393	1.23268e-05	0.0020761	0.013013	17.4608	26.5243	14.8	1.92	0.0821224	0.994074	35.2817
22.679	96.8592	96.7272	81.2133	88.0198	105.079	112.487	1.36483e-05	0.0023737	0.014838	17.0404	27.3158	13.1	1.5	0.0857584	0.995761	37.1893
22.689	96.9999	96.8461	81.2839	88.1318	105.191	112.579	1.34364e-05	0.0028108	0.016315	16.9689	30.5084	10.46	1.15	0.0893587	0.996514	43.0642
22.699	97.1427	96.9642	81.3522	88.2429	105.302	112.671	1.29787e-05	0.003014	0.017463	16.6798	33.8068	12.44	0.88	0.0926205	0.997036	49.2322
22.709	97.2839	97.0831	81.4229	88.3512	105.417	112.756	1.03413e-05	0.0031929	0.018028	16.6899	43.8016	13	0.71	0.0961699	0.997182	65.7143
22.719	97.4258	97.2012	81.4903	88.4655	105.524	112.841	1.05579e-05	0.0032302	0.018014	16.639	42.8697	11.19	0.69	0.0973486	0.99742	65.2679
22.729	97.566	97.3201	81.5573	88.576	105.636	112.926	1.05708e-05	0.003159	0.017654	16.567	41.9618	11.8	0.74	0.097857	0.997567	63.9018
22.739	97.7069	97.4391	81.6189	88.6842	105.748	113.02	8.58867e-06	0.0030618	0.017264	16.5014	50.5048	11.01	0.79	0.097536	0.997729	76.0723
22.749	97.8488	97.5581	81.6835	88.7949	105.863	113.106	4.85643e-06	0.0030099	0.017146	16.406	88.7079	11.67	0.83	0.096788	0.9977	131.374
22.759	97.989	97.678	81.7521	88.9104	105.976	113.193	3.07745e-06	0.0030156	0.017348	16.2843	141.636	11.67	0.86	0.0960367	0.997722	205.781
22.769	98.1299	97.798	81.831	89.0201	106.083	113.279	8.15594e-06	0.0030496	0.017796	16.1469	54.8233	11.9	0.89	0.0949892	0.997799	77.861
22.779	98.27	97.9171	81.8948	89.1336	106.197	113.374	7.91306e-06	0.0030897	0.018542	15.9377	58.8748	12.36	0.96	0.0932246	0.997855	80.7867
22.789	98.4091	98.037	81.9685	89.2512	106.306	113.459	8.14054e-06	0.0031385	0.019278	15.8475	59.5012	11.43	0.96	0.0912812	0.997927	79.4222
22.799	98.5517	98.1579	82.0327	89.3692	106.423	113.546	7.25765e-06	0.0031881	0.020071	15.8807	69.4848	14.43	0.9	0.0894668	0.997981	90.2675
22.809	98.6911	98.278	82.102	89.4818	106.534	113.636	8.80246e-06	0.003222	0.020947	15.6558	59.7908	13.31	0.87	0.0877648	0.998021	74.9813
22.819	98.8328	98.3989	82.1783	89.5947	106.641	113.727	1.27601e-05	0.0032497	0.021462	15.6875	42.2602	10.58	0.99	0.0861594	0.998551	51.8999
22.829	98.973	98.5199	82.2553	89.7068	106.752	113.812	6.16108e-06	0.0032814	0.021772	15.7066	88.7889	10.2	1.28	0.0853856	0.998671	107.781
22.839	99.1175	98.6409	82.3206	89.8215	106.864	113.904	4.82953e-06	0.0033015	0.02232	15.5718	116.12	10.01	1.55	0.0842238	0.998841	136.966
22.849	99.258	98.7619	82.3855	89.9356	106.977	113.993	4.8213e-06	0.0032961	0.022819	15.4742	118.918	10.04	1.76	0.0823028	0.998926	135.076
22.859	99.3998	98.8838	82.455	90.055	107.092	114.084	5.06027e-06	0.0032667	0.023069	15.4384	114.544	11.61	1.9	0.0801424	0.998924	125.503
22.869	99.5409	99.0058	82.5214	90.1768	107.199	114.18	9.46867e-06	0.0032245	0.023414	15.341	62.1303	10.56	1.98	0.0777247	0.998882	65.2911
22.879	99.6819	99.1278	82.5955	90.2997	107.314	114.263	5.72031e-06	0.0031887	0.023684	15.3436	104.029	9.41	1.9	0.0751912	0.998767	105.606
22.889	99.8238	99.2498	82.666	90.4218	107.43	114.359	6.15837e-06	0.0031723	0.024001	15.2258	97.9221	12.37	1.79	0.0733488	0.998727	96.6522
22.899	99.9685	99.3718	82.7387	90.5447	107.545	114.455	4.83755e-06	0.0031553	0.023957	15.3199	124.43	10.65	1.56	0.0724567	0.998688	121.595
22.909	100.111	99.4947	82.809	90.6614	107.656	114.538	4.85113e-06	0.0031128	0.023821	15.3085	123.377	13.2	1.32	0.0716301	0.998614	118.83
22.919	100.253	99.6177	82.8808	90.7855	107.764	114.627	7.46681e-06	0.0030616	0.023685	15.2863	79.6994	13.31	1.2	0.0706037	0.9985	75.4097
22.929	100.398	99.7407	82.9582	90.9033	107.879	114.716	1.52647e-06	0.0030363	0.023659	15.268	389.427	11.66	1.15	0.0698139	0.998423	363.532
22.939	100.54	99.8637	83.0299	91.0293	107.994	114.798	6.80417e-06	0.0030506	0.023802	15.2426	87.8932	11.31	1.04	0.0695251	0.998415	81.378
22.949	100.682	99.9876	83.1	91.1545	108.105	114.888	7.47506e-06	0.0030995	0.02411	15.2147	81.04	14.42	0.98	0.0694289	0.99839	74.6054
22.959	100.825	100.111	83.1664	91.2777	108.217	114.974	2.40119e-06	0.0031682	0.024628	15.1404	257.703	22.46	0.97	0.0693343	0.998385	235.279
22.969	100.966	100.235	83.2396	91.4007	108.33	115.06	6.38918e-06	0.0032375	0.025096	15.1042	98.6908	22.37	1	0.0692206	0.998388	89.7033
22.979	101.105	100.359	83.3091	91.5264	108.442	115.158	7.48514e-06	0.0032951	0.025377	15.2635	85.1839	18.41	1.03	0.0689094	0.998325	77.4602
22.989	101.246	100.483	83.3817	91.6578	108.553	115.245	9.01578e-06	0.0033359	0.025586	15.1893	71.3043	12.17	0.97	0.068475	0.998179	64.8662
22.999	101.388	100.608	83.4484	91.7835	108.665	115.331	4.6148e-06	0.0033559	0.025741	15.1753	140.149	12.42	0.95	0.0679386	0.998019	127.195
23.009	101.531	100.732	83.5207	91.9112	108.775	115.424	6.15679e-06	0.0033551	0.025649	15.2459	104.673	11.35	1.04	0.0671427	0.99785	94.9927
23.019	101.672	100.857	83.5937	92.0356	108.888	115.512	6.38107e-06	0.0033369	0.025533	15.2725	100.537	13.32	1.13	0.066403	0.997777	90.9049
23.029	101.813	100.982	83.6676	92.1641	109.003	115.607	2.43356e-06	0.003313	0.025326	15.2999	261.482	12.71	1.16	0.066018	0.997803	236.415
23.039	101.957	101.107	83.7389	92.2931	109.119	115.697	4.19097e-06	0.0032991	0.025126	15.3193	150.635	12.96	1.15	0.0660448	0.997858	136.959
23.049	102.099	101.232	83.8054	92.4239	109.23	115.792	4.59047e-06	0.0033156	0.024929	15.3843	136.447	11.61	1.11	0.0665484	0.997928	126.105
23.059	102.242	101.357	83.8705	92.5549	109.345	115.883	6.6205e-06	0.0033699	0.024992	15.3321	94.8478	11.72	1.03	0.0679329	0.998125	89.2908
23.069	102.385	101.483	83.9481	92.6868	109.456	115.974	6.58878e-06	0.0034524	0.02496	15.33	95.1823	10.6	0.97	0.0701095	0.998419	92.3979
23.079	102.528	101.608	84.0253	92.8116	109.57	116.057	7.9151e-06	0.0035403	0.024879	15.3293	78.9757	12.46	1	0.0726724	0.998646	79.4027
23.089	102.669	101.734	84.0951	92.9365	109.687	116.144	5.28833e-06	0.0036219	0.024772	15.3394	117.695	14.49	1.06	0.0752493	0.998833	122.689
23.099	102.809	101.86	84.1668	93.0705	109.802	116.231	5.91672e-06	0.0036928	0.02464	15.3471	104.635	12.49	1.18	0.0779952	0.999058	113.311
23.109	102.954	101.986	84.2415	93.2028	109.913	116.329	3.73397e-06	0.003751	0.024318	15.4297	163.634	12.73	1.26	0.080728	0.999167	184.886
23.119	103.096	102.112	84.3084	93.3321	110.025	116.42	3.94473e-06	0.0037815	0.024129	15.3829	153.688	13.15	1.32	0.0826069	0.999122	177.586
23.129	103.239	102.238	84.3789	93.4647	110.141	116.509	2.39495e-06	0.0037662	0.023735	15.4553	249.005	15.03	1.31	0.0831972	0.999009	291.304
23.139	103.378	102.365	84.449	93.6013	110.253	116.596	8.15321e-06	0.0037168	0.02345	15.3279	72.2655	16.4	1.28	0.0829565	0.998814	84.0503
23.149	103.516	102.491	84.519	93.7392	110.368	116.691	3.30091e-06	0.0036662	0.02296	15.425	174.765	13.43	1.29	0.0826329	0.998546	203.053
23.159	103.66	102.618	84.5917	93.8745	110.476	116.795	8.59393e-06	0.0036258	0.022749	15.4001	66.5101	13.87	1.27	0.0818668	0.998195	76.3713
23.169	103.798	102.745	84.6611	94.0077	110.591	116.887	2.17924e-06	0.0035929	0.022479	15.4849	259.172	15.87	1.22	0.0809219	0.997783	295.401
23.179	103.938	102.872	84.731	94.1398	110.706	116.98	3.50662e-06	0.0035608	0.022299	15.4041	159.777	15.08	1.14	0.0798776	0.997285	179.563
23.189	104.078	102.999	84.8082	94.2772	110.821	117.075	4.39285e-06	0.003529	0.021885	15.573	125.175	14.49	1.04	0.0788623	0.996653	140.155
23.199	104.221	103.126	84.8772	94.4197	110.936	117.177	4.38474e-06	0.0034861	0.021657	15.5852	124.1	14.45	0.98	0.0777219	0.996077	137.317
23.209	104.362	103.253	84.9443	94.5681	111.051	117.282	2.83567e-06	0.0034239	0.021145	15.7203	187.356	14.62	0.94	0.0769069	0.995511	207.461
23.219	104.502	103.38	85.0113	94.7054	111.168	117.389	6.36945e-06	0.0033219	0.020419	15.6916	80.547	14.58	0.91	0.077204	0.994451	89.3326
23.229	104.642	103.508	85.0783	94.8342	111.286	117.481	3.06384e-06	0.0031479	0.019239	15.776	157.773	15.89	0.88	0.0764873	0.994889	176.269
23.239	104.784	103.635	85.1498	94.9676	111.403	117.567	3.30551e-06	0.0029155	0.017788	15.8089	135.209	14.99	0.88	0.0774955	0.994585	151.804
23.249	104.921	103.763	85.2173	95.1097	111.518	117.662	4.22744e-07	0.0026646	0.016054	15.8023	954.164	16.5	0.9	0.0777255	0.994513	1086.1
23.259	105.066	103.89	85.3005	95.2491	111.633	117.764	-4.40942e-06	0.0024243	0.014349	15.938	-81.763	15.78	0.94	0.0793059	0.994483	-94.9807
23.269	105.207	104.018	85.372	95.3818	111.748	117.864	-4.21554e-06	0.0021895	0.012636	16.0401	-75.3135	15.45	1.03	0.0812237	0.993915	-89.5899
23.279	105.346	104.145	85.4357	95.5147	111.863	117.956	-2.68086e-06	0.001812	0.010876	15.9162	-101.932	17.31	1.19	0.0822345	0.992521	-123.423
23.289	105.485	104.273	85.4996	95.6549	111.979	118.047	1.29108e-06	0.0015776	0.0091148	16.158	177.382	14.48	1.52	0.0815103	0.990979	214.425
23.299	105.627	104.401	85.5753	95.7968	112.099	118.137	-1.56454e-06	0.001283	0.0075178	15.6682	-120.732	17.04	2.07	0.0815465	0.988522	-143.64
23.309	105.768	104.529	85.6442	95.9298	112.214	118.227	-3.30674e-06	0.0010137	0.0059144	16.1189	-44.9395	15.36	2.65	0.0804153	0.985261	-54.0563
23.319	105.908	104.657	85.714	96.0636	112.332	118.322	-5.73844e-06	0.00079842	0.0046594	16.1464	-20.4011	13.43	3.99	0.0811298	0.983394	-24.3341
23.329	106.049	104.785	85.784	96.1922	112.451	118.416	-7.29202e-06	0.00058759	0.0033655	15.3957	-11.5963	13.21	7.02	0.0820649	0.983074	-14.4555
23.339	106.188	104.913	85.8522	96.3265	112.569	118.511	-5.98106e-06	0.00039935	0.0021108	16.0994	-8.86719	11.91	11.61	0.0832013	0.980557	-12.4615
23.349	106.329	105.041	85.9283	96.4633	112.687	118.612	-7.94497e-06	0.00021583	0.0011232	17.7075	-3.55207	8.86	19.63	0.0855613	0.968962	-6.10864
23.359	106.472	105.169	85.9972	96.5931	112.804	118.711	-7.52657e-06	9.495e-05	0.00055848	18.4512	-1.86435	15.51	29.39	0.0832642	0.967786	-4.42313
23.369	106.612	105.297	86.0679	96.7284	112.922	118.808	-4.64576e-06	4.0457e-05	0.00031094	18.0222	-1.68166	14.86	34.75	0.12476	0.947813	-6.14173
23.379	106.75	105.425	86.1362	96.8644	113.045	118.902	-7.0676e-06	3.0334e-05	0.00015595	22.1719	-0.554409	6.88	39.22	0.230212	0.930188	-4.04819
23.389	106.89	105.553	86.2132	97.0103	113.167	118.994	-4.20198e-06	2.6481e-05	9.2006e-05	30.909	-0.550147	7.03	40.96	0.332746	0.902144	-6.28822
23.399	107.031	105.681	86.2822	97.1375	113.286	119.09	-8.15963e-06	2.1787e-05	6.7858e-05	39.4288	-0.208953	11.44	36.01	0.323355	0.847268	-2.56066
23.409	107.173	105.809	86.3529	97.276	113.41	119.182	-7.7439e-06	1.4901e-05	5.7951e-05	42.1058	-0.188026	2.82	26.94	0.12804	0.766475	-1.73969
23.419	107.315	105.938	86.4194	97.4151	113.529	119.276	-5.53399e-06	7.1209e-06	5.3608e-05	42.3935	-0.243393	6.07	24.06	-0.102176	-0.80495	-1.35454
23.429	107.458	106.066	86.4881	97.5532	113.65	119.372	-7.95747e-06	7.2344e-06	5.2042e-05	42.1576	-0.164322	5.12	27.6	-0.122347	-0.829067	-0.978327
23.439	107.599	106.194	86.5562	97.6903	113.772	119.476	-7.7466e-06	6.7764e-06	5.2132e-05	41.7152	-0.169087	4.93	31.76	-0.118662	-0.842546	-1.0418
23.449	107.739	106.322	86.6224	97.821	113.897	119.571	-7.5222e-06	6.3631e-06	5.3077e-05	41.3031	-0.177288	0.84	34.2	-0.118143	-0.825145	-1.08962
23.459	107.878	106.451	86.692	97.951	114.018	119.666	-9.04983e-06	6.5258e-06	5.4355e-05	40.9701	-0.150909	14.98	36.06	-0.11487	-0.806455	-0.927023
23.469	108.015	106.579	86.7593	98.0864	114.142	119.774	-7.95844e-06	7.0909e-06	5.532e-05	40.6802	-0.174651	14.97	38.37	-0.113093	-0.817141	-1.11492
23.479	108.155	106.707	86.8263	98.217	114.263	119.881	-8.84773e-06	7.9082e-06	5.6286e-05	40.1841	-0.15984	16.29	41.59	-0.104185	-0.772416	-1.08461
23.489	108.292	106.836	86.896	98.3506	114.383	119.986	-6.62221e-06	8.8643e-06	5.7349e-05	39.5321	-0.21759	12.73	38.12	-0.119482	-0.814155	-1.50204
23.499	108.432	106.964	86.9687	98.4837	114.504	120.089	-7.08381e-06	9.6154e-06	5.9026e-05	39.092	-0.20936	18.14	34.22	-0.146848	-0.898747	-1.3551
23.509	108.568	107.092	87.0372	98.6167	114.626	120.189	-6.62226e-06	9.2919e-06	6.0893e-05	38.9988	-0.231035	15.15	28.8	-0.164221	-0.918447	-1.35525
23.519	108.708	107.22	87.1034	98.7461	114.748	120.289	-7.72126e-06	9.5637e-06	6.1814e-05	39.3415	-0.201148	3.41	25.26	-0.167506	-0.942076	-1.22532
23.529	108.846	107.349	87.1676	98.8868	114.872	120.385	-6.85202e-06	9.8347e-06	6.1365e-05	40.019	-0.225019	10.93	24.15	-0.175766	-0.960025	-1.37984
23.539	108.987	107.477	87.2334	99.0207	114.995	120.484	-8.61211e-06	1.0489e-05	6.0082e-05	40.3755	-0.175288	3.45	25.84	-0.184006	-0.968117	-1.13587
23.549	109.126	107.605	87.3003	99.1465	115.115	120.581	-4.86578e-06	1.0762e-05	5.8874e-05	40.592	-0.30401	13.33	27.12	-0.183063	-0.97066	-2.00529
23.559	109.265	107.734	87.37	99.2778	115.237	120.679	-7.07744e-06	1.1108e-05	5.7497e-05	40.8632	-0.20412	8.54	27.91	-0.164184	-0.959055	-1.45519
23.569	109.408	107.862	87.4382	99.4044	115.358	120.77	-6.19299e-06	1.0965e-05	5.5404e-05	41.2032	-0.22478	5.13	28.96	-0.127189	-0.92579	-1.78121
23.579	109.551	107.99	87.5053	99.5421	115.479	120.871	-7.72396e-06	1.1088e-05	5.2785e-05	41.3792	-0.171707	10.21	34.33	-0.0897701	-0.806414	-1.50609
23.589	109.696	108.119	87.5723	99.6748	115.604	120.98	-8.38775e-06	1.1585e-05	5.0428e-05	41.5229	-0.151058	7.95	39.59	-0.0643993	-0.66922	-1.43817
23.599	109.84	108.247	87.6366	99.8041	115.728	121.087	-9.26944e-06	1.1521e-05	4.8967e-05	41.6512	-0.132729	11.95	39.45	-0.0614829	-0.655913	-1.24581
23.609	109.979	108.375	87.7033	99.9376	115.854	121.19	-6.86554e-06	1.0745e-05	4.8297e-05	41.6553	-0.176751	8.72	41.57	-0.0680813	-0.693636	-1.57511
23.619	110.121	108.503	87.7739	100.068	115.982	121.286	-5.74118e-06	9.7706e-06	4.8201e-05	41.7318	-0.210946	6.13	44.71	-0.0778244	-0.676552	-1.79667
23.629	110.262	108.632	87.8449	100.197	116.107	121.396	-3.77819e-06	8.5239e-06	4.8201e-05	41.6913	-0.320545	8.48	45	-0.083275	-0.633025	-2.65815
23.639	110.403	108.76	87.9132	100.319	116.233	121.496	-8.62393e-06	7.3527e-06	4.8241e-05	41.762	-0.140549	11.42	43.09	-0.0883089	-0.690854	-1.1065
23.649	110.546	108.888	87.9812	100.453	116.359	121.601	-8.15859e-06	6.9784e-06	4.889e-05	41.7868	-0.150564	11.7	43.46	-0.0843841	-0.708204	-1.07595
23.659	110.687	109.016	88.0492	100.574	116.487	121.706	-7.28498e-06	7.7139e-06	5.0475e-05	41.8735	-0.174086	6.43	38.75	-0.0693527	-0.639646	-1.20103
23.669	110.824	109.145	88.1154	100.702	116.616	121.821	-9.71698e-06	7.5507e-06	5.2336e-05	41.6858	-0.135328	11.37	34.25	-0.050831	-0.498383	-0.901782
23.679	110.967	109.273	88.1823	100.831	116.742	121.928	-3.76379e-06	6.2673e-06	5.4261e-05	41.3879	-0.362225	11.95	36.63	-0.0383935	-0.36207	-2.31495
23.689	111.105	109.401	88.2511	100.959	116.868	122.037	-3.74408e-06	4.8399e-06	5.6096e-05	41.2478	-0.376447	10.87	41.13	-0.00554446	-0.0507398	-2.38139
23.699	111.242	109.529	88.3192	101.079	116.995	122.135	-6.19024e-06	2.9078e-06	5.7041e-05	41.0784	-0.231524	12.03	43.69	0.00149393	0.0145504	-1.36867
23.709	111.383	109.657	88.3845	101.201	117.124	122.24	-6.61399e-06	2.6087e-06	5.792e-05	40.7522	-0.22003	11.32	45.05	-0.0160724	-0.18164	-1.16314
23.719	111.52	109.785	88.454	101.325	117.259	122.354	-5.51772e-06	4.1653e-06	5.8845e-05	40.4125	-0.267958	9.73	45.54	-0.032566	-0.36066	-1.18786
23.729	111.66	109.913	88.5258	101.448	117.389	122.464	-8.17319e-06	5.8628e-06	5.9206e-05	40.1056	-0.182008	11.94	50.66	-0.0688149	-0.642419	-0.587592
23.739	111.798	110.042	88.5969	101.565	117.522	122.57	-9.4958e-06	8.2748e-06	5.9249e-05	39.228	-0.156771	6.61	45.92	-0.100366	-0.817783	-0.332568
23.749	111.942	110.17	88.6634	101.682	117.656	122.675	-9.93981e-06	1.1078e-05	6.0934e-05	36.0677	-0.154028	10.61	39.44	-0.0928319	-0.830558	-0.376909
23.759	112.078	110.298	88.7312	101.806	117.789	122.781	-3.78103e-06	1.2645e-05	6.7214e-05	32.7303	-0.446649	12.05	32.83	-0.0640571	-0.568665	-1.30187
23.769	112.217	110.426	88.7965	101.921	117.92	122.893	-8.40293e-06	1.5578e-05	8.155e-05	28.6627	-0.243843	11.35	31.21	-0.0229276	-0.201272	-0.69922
23.779	112.358	110.554	88.8642	102.037	118.05	123.008	-7.73851e-06	2.2262e-05	0.00010978	23.3937	-0.356437	13.24	33.32	0.023971	0.237094	-0.860295
23.789	112.501	110.682	88.943	102.156	118.182	123.115	-6.18392e-06	3.2588e-05	0.00015268	16.9518	-0.620348	17.95	27.96	0.0717355	0.698798	-1.35383
23.799	112.638	110.81	89.0158	102.281	118.31	123.229	-5.97667e-06	4.6449e-05	0.00020751	14.9632	-0.872361	3.88	20.59	0.0886867	0.838686	-1.74897
23.809	112.781	110.938	89.086	102.397	118.445	123.339	-5.53936e-06	6.0074e-05	0.00026751	14.7408	-1.21338	9.71	17.42	0.0944737	0.876871	-2.28258
23.819	112.919	111.066	89.1533	102.512	118.581	123.45	-4.65833e-06	6.9517e-05	0.00031898	14.7611	-1.72048	12.06	17.2	0.0900284	0.87088	-3.10326
23.829	113.057	111.194	89.2185	102.628	118.713	123.561	-5.75296e-06	7.4234e-05	0.00035597	14.6936	-1.55467	11.78	19.3	0.0660227	0.798114	-2.65585
23.904	114.101	112.153	89.7412	103.477	119.725	124.456	3.09192e-06	0.00066331	0.0033289	13.735	27.0513	14.83	2.1	0.16802	0.997465	51.6798
23.914	114.237	112.281	89.8092	103.59	119.863	124.572	1.33271e-06	0.00082314	0.0039203	13.7813	73.9097	10.17	1.24	0.18315	0.998283	154.513
23.924	114.375	112.409	89.876	103.701	120.004	124.693	1.97383e-06	0.00096735	0.0044584	14.0576	56.7527	12.31	0.99	0.186677	0.999299	127.392
23.934	114.514	112.536	89.9418	103.811	120.142	124.819	3.31011e-06	0.0011119	0.0048655	14.1783	36.932	11.12	0.94	0.201829	0.999071	88.9881
23.944	114.655	112.664	90.0132	103.92	120.279	124.945	5.74203e-06	0.0012439	0.0053687	14.38	23.492	13.4	0.97	0.211842	0.998985	59.1516
23.954	114.796	112.792	90.0884	104.03	120.421	125.069	5.52102e-06	0.0013772	0.0057967	14.1294	26.3802	13.89	1	0.221944	0.998787	69.8023
23.964	114.935	112.92	90.1602	104.138	120.564	125.192	2.84683e-06	0.0014982	0.0061093	14.2797	53.9197	13.67	1.02	0.223758	0.999049	150.259
23.974	115.073	113.047	90.2308	104.248	120.703	125.318	6.60143e-06	0.0016127	0.0064929	14.5422	24.7126	14.14	1.01	0.233508	0.998642	70.0924
23.984	115.209	113.175	90.297	104.356	120.845	125.448	8.60497e-06	0.0017184	0.0067258	14.3618	19.6386	14.24	0.96	0.238102	0.99855	57.5365
23.994	115.348	113.303	90.3636	104.465	120.987	125.579	9.03851e-06	0.0018428	0.0070777	14.3152	19.6749	16.34	0.87	0.24687	0.998816	59.4302
24.004	115.488	113.43	90.4322	104.579	121.129	125.713	7.92707e-06	0.0019749	0.007292	14.5039	23.1127	13.33	0.81	0.260528	0.999193	74.5849
24.014	115.631	113.558	90.4998	104.693	121.272	125.848	8.80596e-06	0.0020975	0.0075047	14.4597	21.4128	13.37	0.76	0.278947	0.999478	73.6047
24.024	115.773	113.685	90.5696	104.801	121.416	125.984	5.29565e-06	0.0021328	0.0073736	14.6701	34.9847	14.94	0.73	0.293487	0.999689	128.834
24.034	115.91	113.813	90.6396	104.904	121.561	126.117	1.27826e-05	0.0020512	0.0070924	14.7545	13.9409	15.12	0.73	0.298584	0.999773	52.8592
24.044	116.047	113.941	90.7048	105.011	121.705	126.256	1.30068e-05	0.0018817	0.0065167	14.9589	12.5885	17.98	0.81	0.298793	0.999794	48.8044
24.054	116.183	114.068	90.7722	105.118	121.849	126.397	8.59951e-06	0.0017077	0.0058891	15.1336	17.2065	15.79	0.91	0.300445	0.999787	68.3027
24.064	116.318	114.196	90.8426	105.223	121.994	126.544	5.94759e-06	0.0015925	0.0053923	15.2702	22.7798	19.66	1.1	0.305407	0.999765	93.569
24.074	116.452	114.323	90.915	105.328	122.143	126.686	2.66182e-06	0.0015723	0.0052455	15.1094	49.5136	14.47	1.34	0.312279	0.999645	208.436
24.084	116.586	114.451	90.9894	105.434	122.291	126.821	-9.04303e-07	0.0016173	0.0054345	15.0765	-150.995	0.01	1.67	0.306222	0.999481	-629.899
24.094	116.722	114.578	91.0652	105.542	122.435	126.961	5.95946e-06	0.0016937	0.0060355	15.0644	25.4462	13.83	2.08	0.28507	0.999237	98.9837
24.104	116.857	114.705	91.1364	105.648	122.576	127.104	9.46777e-06	0.0018086	0.0070658	14.7401	18.7513	1.06	2.38	0.261395	0.999007	65.5128
24.114	116.99	114.832	91.2092	105.754	122.718	127.248	1.49935e-05	0.0019759	0.0081677	14.9408	13.6872	19.07	2.5	0.239233	0.999281	44.7422
24.124	117.124	114.958	91.282	105.858	122.859	127.39	1.29995e-05	0.0021716	0.0093733	15.0111	18.1169	17.03	2.5	0.223303	0.999483	56.2584
24.134	117.257	115.082	91.3604	105.964	123.002	127.522	1.32323e-05	0.0023465	0.010548	15.0815	20.0287	13.465	2.5	0.218703	0.999382	59.4085
24.144	117.388	115.205	91.4368	106.069	123.137	127.645	1.32253e-05	0.0024979	0.011551	15.2917	21.9447	14.95	2.37	0.203217	0.999606	62.2593
24.154	117.518	115.325	91.5138	106.175	123.27	127.77	1.56385e-05	0.0026035	0.012855	15.2315	20.6535	17.79	2.2	0.18688	0.999691	53.3528
24.164	117.643	115.442	91.5876	106.277	123.4	127.894	1.41042e-05	0.0026875	0.013794	15.8283	24.573	14.11	2	0.165918	0.999876	58.5349
24.174	117.763	115.557	91.6574	106.38	123.523	128.01	1.30135e-05	0.002781	0.015246	15.9264	29.436	15.1	1.7	0.153636	0.99993	63.5426
24.184	117.881	115.667	91.7288	106.483	123.644	128.127	1.7203e-05	0.0029188	0.016726	15.6971	24.4289	11.02	1.41	0.144442	0.999963	49.5739
24.194	117.992	115.774	91.7996	106.585	123.756	128.239	1.71895e-05	0.0030679	0.017943	15.6894	26.2271	11.48	1.24	0.140681	0.999943	51.7969
24.204	118.097	115.877	91.8698	106.686	123.86	128.336	1.78525e-05	0.003203	0.018848	15.6729	26.5267	11.56	1.15	0.141022	0.999976	52.0778
24.214	118.196	115.975	91.9406	106.789	123.96	128.423	1.89592e-05	0.0033164	0.019218	15.6008	25.4685	11.12	1.08	0.141366	0.999951	51.0263
24.224	118.291	116.07	92.01	106.893	124.051	128.506	1.58833e-05	0.0033615	0.01894	15.6689	29.9611	11.02	1.08	0.148393	0.999962	62.6043
24.234	118.383	116.16	92.0824	106.999	124.136	128.585	1.43282e-05	0.0033275	0.018259	15.8063	32.0186	11.31	1	0.153611	0.999944	70.1135
24.244	118.471	116.247	92.1568	107.103	124.217	128.659	1.41108e-05	0.0032573	0.017543	15.9154	31.2371	11.82	0.91	0.158929	0.99992	71.4277
24.254	118.555	116.332	92.2276	107.207	124.292	128.728	1.05997e-05	0.0031902	0.016915	15.9265	40.0954	9.85	0.85	0.163156	0.999907	95.0968
24.264	118.638	116.415	92.2954	107.31	124.362	128.793	1.60894e-05	0.0031455	0.01659	16.1426	25.9074	10.6	0.84	0.164203	0.999914	62.5008
24.274	118.72	116.496	92.3622	107.413	124.431	128.855	1.34388e-05	0.0031709	0.016826	16.1512	31.4583	10.85	0.82	0.16299	0.999895	75.5496
24.284	118.799	116.575	92.4306	107.516	124.498	128.915	1.5852e-05	0.0032714	0.01748	16.1505	27.7061	10.44	0.8	0.161054	0.999922	65.9918
24.294	118.878	116.653	92.4996	107.62	124.564	128.974	1.80792e-05	0.0034017	0.018328	16.3152	25.4713	10.08	0.79	0.158792	0.999926	60.4284
24.304	118.952	116.731	92.5682	107.727	124.629	129.034	2.1621e-05	0.0035595	0.019411	16.3229	22.5574	8.29	0.77	0.154475	0.999945	52.9763
24.314	119.028	116.809	92.6366	107.832	124.694	129.09	2.55745e-05	0.0037363	0.020494	16.2675	20.1343	7.61	0.81	0.155915	0.999936	47.3205
24.324	119.106	116.886	92.7076	107.934	124.76	129.147	2.66597e-05	0.0039398	0.021629	16.3116	20.3844	7.95	0.79	0.154249	0.999927	48.0763
24.334	119.184	116.964	92.7804	108.037	124.827	129.208	2.27306e-05	0.0041535	0.022713	16.3751	25.1061	7.24	0.73	0.154099	0.999976	59.62
24.344	119.261	117.041	92.8526	108.141	124.892	129.266	2.44556e-05	0.0043687	0.023888	16.2883	24.5425	8.64	0.75	0.154979	0.999898	58.3179
24.354	119.338	117.119	92.9254	108.242	124.956	129.324	2.62333e-05	0.0045395	0.024905	16.2608	23.8534	6.33	0.77	0.154769	0.999992	56.5693
24.364	119.415	117.197	92.9964	108.342	125.021	129.383	2.58041e-05	0.0046741	0.025717	16.1838	25.0408	9.09	0.85	0.15459	0.999989	59.1301
24.374	119.491	117.274	93.0666	108.445	125.09	129.442	2.40305e-05	0.0047787	0.026645	16.1833	27.8593	7.29	0.95	0.151797	0.999978	64.7136
24.384	119.568	117.352	93.138	108.549	125.157	129.501	2.95174e-05	0.0048849	0.027412	16.189	23.3335	9.3	1.02	0.150735	0.999994	53.3178
24.394	119.645	117.429	93.2118	108.653	125.222	129.556	2.68947e-05	0.0050036	0.028418	16.0072	26.5488	8.58	1.11	0.147578	0.999977	59.0117
24.404	119.721	117.507	93.2822	108.757	125.286	129.613	2.62319e-05	0.0052045	0.02972	15.9323	28.4666	9.15	1.2	0.145373	0.99998	61.265
24.414	119.799	117.584	93.3506	108.859	125.352	129.675	2.55869e-05	0.0056303	0.031764	15.8115	31.1914	10.49	1.27	0.141678	0.999978	64.6308
24.424	119.879	117.662	93.4192	108.96	125.417	129.734	2.7085e-05	0.006041	0.034764	15.6055	32.2492	8.89	1.29	0.137906	0.999938	64.1168
24.434	119.957	117.739	93.4904	109.062	125.484	129.792	2.48957e-05	0.0068845	0.038836	15.3982	39.1947	8.56	1.34	0.136613	0.999987	74.9849
24.444	120.036	117.816	93.5672	109.168	125.551	129.849	3.26315e-05	0.007595	0.043722	15.2602	33.6651	9.35	1.28	0.133618	0.999962	62.3355
24.454	120.115	117.894	93.644	109.274	125.618	129.908	3.56965e-05	0.0085127	0.048696	15.2077	34.2756	10.77	1.16	0.132267	0.999982	62.3562
24.464	120.193	117.971	93.7194	109.375	125.686	129.967	4.43033e-05	0.0094314	0.053766	15.2184	30.4922	7.74	1.52	0.133512	0.999847	56.2757
24.474	120.27	118.049	93.793	109.477	125.756	130.027	4.45233e-05	0.010279	0.058965	15.1709	33.2754	9.16	1.08	0.131244	0.999911	60.0517
24.484	120.348	118.126	93.8658	109.576	125.826	130.09	4.6518e-05	0.011065	0.062999	15.282	34.0275	7.18	1.04	0.132596	0.999836	62.2383
24.494	120.426	118.204	93.9424	109.678	125.894	130.152	5.11437e-05	0.011823	0.066357	15.3721	32.5995	6	0.98	0.133624	0.999787	60.5216
24.504	120.502	118.281	94.0168	109.782	125.961	130.215	5.06956e-05	0.012142	0.068577	15.5316	33.988	7.74	0.94	0.134943	0.999792	64.5224
24.514	120.58	118.358	94.0896	109.886	126.029	130.281	5.42157e-05	0.012444	0.070009	15.6015	32.4449	6.16	0.87	0.136085	0.999803	62.6553
24.524	120.656	118.436	94.1628	109.989	126.097	130.345	5.66711e-05	0.012403	0.069983	15.7807	31.0276	9.23	0.82	0.138046	0.999784	61.7405
24.534	120.73	118.513	94.2352	110.092	126.164	130.408	6.21531e-05	0.012144	0.068573	15.929	27.7209	9.09	0.89	0.139117	0.999776	56.3238
24.544	120.806	118.591	94.3082	110.196	126.233	130.469	6.39392e-05	0.011653	0.065572	16.0665	25.7673	7.27	0.87	0.140208	0.999777	53.6041
24.554	120.883	118.668	94.382	110.297	126.303	130.526	6.08459e-05	0.010927	0.06159	16.1826	25.4329	5.82	0.88	0.142793	0.999659	54.3915
24.564	120.957	118.745	94.4562	110.398	126.369	130.584	5.81997e-05	0.010125	0.057024	16.2946	24.618	4.08	0.88	0.145924	0.999667	54.2116
24.574	121.034	118.823	94.5312	110.501	126.438	130.648	5.31319e-05	0.0094923	0.052133	16.4398	24.6533	3.44	0.91	0.14741	0.99973	55.718
24.584	121.111	118.9	94.6096	110.603	126.508	130.712	4.76081e-05	0.0085178	0.04742	16.4853	25.0263	4.13	0.92	0.15047	0.999639	57.8284
24.594	121.187	118.977	94.687	110.709	126.578	130.778	4.65027e-05	0.0077585	0.043218	16.6341	23.3509	5.06	0.9	0.150144	0.999634	54.4399
24.604	121.262	119.055	94.76	110.814	126.644	130.846	5.20191e-05	0.0073013	0.040267	16.6757	19.4493	5	0.89	0.149427	0.999522	45.2718
24.614	121.338	119.132	94.834	110.917	126.708	130.91	4.62871e-05	0.0068508	0.038454	16.7521	20.8737	5.39	1	0.148686	0.999432	48.5298
24.624	121.414	119.21	94.9104	111.02	126.776	130.97	4.89336e-05	0.0066856	0.037436	16.7835	19.222	5.5	0.91	0.146105	0.999404	44.2191
24.634	121.489	119.287	94.9814	111.122	126.846	131.037	5.04729e-05	0.0065506	0.037086	16.7134	18.4616	7.43	0.9	0.145161	0.999268	42.074
24.644	121.563	119.364	95.058	111.226	126.915	131.103	4.5207e-05	0.0064343	0.036817	16.8063	20.4626	6.74	0.91	0.143366	0.999312	46.4022
24.654	121.639	119.442	95.143	111.329	126.983	131.165	4.65125e-05	0.0063487	0.036827	16.7843	19.8936	5.16	0.97	0.142127	0.999343	44.7127
24.664	121.716	119.519	95.226	111.431	127.052	131.231	4.71701e-05	0.0062872	0.03683	16.7821	19.6179	6.52	1.08	0.141388	0.999403	43.8944
24.674	121.792	119.596	95.3096	111.535	127.123	131.296	5.00319e-05	0.0062488	0.036796	16.7825	18.4787	6.22	1.22	0.14131	0.999468	41.4216
24.684	121.867	119.674	95.3898	111.64	127.193	131.365	4.32107e-05	0.0062137	0.036655	16.8007	21.3137	5.22	1.34	0.141646	0.999542	48.1177
24.694	121.943	119.751	95.462	111.743	127.263	131.427	4.27571e-05	0.0061588	0.036252	16.8782	21.303	5.96	1.38	0.142197	0.999617	48.6843
24.704	122.018	119.829	95.5408	111.844	127.332	131.492	4.51871e-05	0.006075	0.035855	16.9016	19.9366	6.66	1.33	0.14292	0.999668	45.9865
24.714	122.094	119.906	95.6166	111.942	127.401	131.561	4.01224e-05	0.0059871	0.035085	17.0053	21.9711	6.87	1.25	0.143607	0.99965	51.4949
24.724	122.171	119.983	95.6954	112.039	127.47	131.632	3.90295e-05	0.0058727	0.03442	17.1037	22.1582	7.24	1.19	0.144101	0.999674	52.3706
24.734	122.247	120.061	95.7794	112.137	127.54	131.704	4.18788e-05	0.0057131	0.033483	17.1697	20.0885	5.42	1.17	0.144069	0.999612	47.8595
24.744	122.322	120.138	95.8624	112.236	127.609	131.775	4.1428e-05	0.0054315	0.031939	17.3198	19.3706	6.08	1.15	0.144549	0.999493	46.6448
24.754	122.398	120.216	95.9452	112.336	127.677	131.841	4.14479e-05	0.0049484	0.029988	17.405	18.1787	6.31	1.12	0.14326	0.999375	43.8574
24.764	122.472	120.293	96.024	112.435	127.747	131.909	4.51881e-05	0.0046378	0.02746	17.5065	15.2684	6.02	1.14	0.143492	0.999286	36.9721
24.774	122.547	120.37	96.1004	112.535	127.819	131.98	4.20897e-05	0.0040639	0.024586	17.693	14.6767	6.63	1.27	0.142357	0.999251	35.7878
24.784	122.624	120.448	96.1722	112.636	127.892	132.052	4.21059e-05	0.0035653	0.02165	17.8102	12.9191	5.74	1.46	0.142436	0.998868	31.7319
24.794	122.7	120.525	96.2476	112.735	127.966	132.123	3.88122e-05	0.0031918	0.018835	17.9857	12.1931	5.88	1.63	0.143595	0.998581	30.3977
24.804	122.773	120.603	96.3266	112.835	128.038	132.195	4.0989e-05	0.0027114	0.016099	18.1939	9.86844	6.57	1.83	0.145506	0.998103	25.3775
24.814	122.849	120.68	96.4068	112.934	128.109	132.269	4.05604e-05	0.0023609	0.013931	18.4964	8.62973	6.32	2.13	0.144229	0.996967	22.4285
24.824	122.923	120.757	96.4872	113.031	128.178	132.34	4.16545e-05	0.0021073	0.012139	18.8775	7.32215	6.51	2.46	0.142804	0.996211	19.1766
24.834	122.998	120.835	96.5632	113.128	128.249	132.416	3.96867e-05	0.0018377	0.010898	19.0595	6.89951	8.02	2.75	0.137822	0.994119	17.7077
24.844	123.071	120.912	96.637	113.227	128.321	132.496	4.07717e-05	0.001654	0.0099162	19.2034	6.11087	6.67	2.92	0.135382	0.991813	15.5125
24.854	123.143	120.99	96.7136	113.324	128.394	132.573	4.69581e-05	0.0015171	0.0091281	19.5187	4.88413	5	3	0.131473	0.99123	12.2166
24.864	123.216	121.067	96.795	113.423	128.467	132.645	4.56255e-05	0.0013696	0.0082027	19.6484	4.51717	3.88	2.97	0.129694	0.987983	11.2163
25.48	127.616	125.847	102.164	119.056	132.936	138.011	3.94658e-05	0.0037256	0.016549	19.7967	10.5358	6.97	4.23	0.161207	0.994824	34.4298
25.49	127.683	125.924	102.257	119.14	133.014	138.096	4.3211e-05	0.0038974	0.017735	22.6815	10.3123	5.9	4.31	0.16368	0.992702	37.907
25.5	127.751	126.001	102.353	119.226	133.088	138.181	5.44616e-05	0.0042497	0.020362	25.7634	9.39392	6.16	4.3	0.164972	0.985036	38.6933
25.51	127.822	126.079	102.437	119.313	133.167	138.28	8.84167e-05	0.004746	0.024174	28.4795	6.8696	5.97	4.01	0.15652	0.984564	29.4175
25.52	127.892	126.156	102.527	119.402	133.244	138.365	0.000124995	0.0054965	0.030265	30.6798	6.08364	5.29	3.25	0.154028	0.990283	26.0577
25.53	127.962	126.234	102.635	119.482	133.315	138.448	0.000124121	0.0070878	0.040243	32.8199	8.14633	6.4	3.19	0.173724	0.994571	39.2738
25.54	128.03	126.311	102.715	119.564	133.385	138.538	0.000129416	0.01098	0.056266	34.459	10.9238	6.3	4.77	0.188345	0.985513	61.9203
25.55	128.099	126.388	102.801	119.653	133.46	138.631	0.000200172	0.016428	0.077336	35.3287	9.70722	7.08	5.7	0.191839	0.973662	60.5579
25.56	128.166	126.465	102.896	119.738	133.537	138.719	0.000389314	0.022259	0.098375	36.0245	6.34895	6.21	6.05	0.19825	0.967081	42.7418
25.57	128.233	126.543	102.984	119.82	133.612	138.803	0.000616791	0.027543	0.11591	36.2628	4.72172	6.11	6.17	0.20386	0.969001	33.1101
25.58	128.302	126.62	103.08	119.908	133.687	138.885	0.000680055	0.032207	0.12828	36.5429	4.73949	6.52	6.5	0.21155	0.97064	34.7678
25.59	128.371	126.697	103.194	119.993	133.761	138.967	0.000582637	0.035759	0.13731	36.5616	5.92135	7.8	6.67	0.213476	0.968638	44.1269
25.6	128.44	126.774	103.295	120.074	133.832	139.05	0.00049598	0.03761	0.13841	36.0913	7.01165	7.41	6.79	0.221121	0.969692	53.5223
25.61	128.511	126.851	103.412	120.162	133.908	139.136	0.000416206	0.037764	0.12811	35.3378	7.73377	6.02	6.67	0.238451	0.971386	62.4762
25.62	128.58	126.928	103.506	120.246	133.983	139.219	0.000311273	0.035615	0.11179	34.6122	9.02356	4.73	6.37	0.253303	0.973526	75.0305
25.63	128.647	127.005	103.614	120.331	134.058	139.311	0.000192238	0.031183	0.094386	33.448	12.3363	6.29	6.19	0.266423	0.981978	102.451
25.64	128.716	127.082	103.704	120.412	134.131	139.396	0.00013118	0.026489	0.078914	31.7144	15.1148	5.37	5.16	0.281469	0.988684	121.977
25.65	128.786	127.159	103.815	120.495	134.204	139.49	0.000103147	0.022722	0.068358	29.2663	16.6514	5.99	3.97	0.291402	0.992436	126.916
25.66	128.853	127.236	103.921	120.575	134.277	139.583	9.7419e-05	0.020376	0.063986	27.2588	16.5028	4.97	2.41	0.292125	0.994558	115.327
25.67	128.921	127.313	104.03	120.658	134.351	139.673	0.00012938	0.019244	0.065358	25.8074	12.6925	4.39	1.25	0.277553	0.99652	81.4964
25.68	128.986	127.39	104.132	120.745	134.421	139.766	0.00018563	0.019703	0.07052	24.5492	9.54512	4.3	1.02	0.275278	0.998077	58.7675
25.69	129.056	127.466	104.228	120.829	134.493	139.855	0.000201473	0.021887	0.077974	23.5602	9.7241	4.32	1.22	0.290339	0.999341	62.316
25.7	129.123	127.543	104.327	120.917	134.566	139.943	0.000171955	0.02592	0.087065	22.8976	12.7217	4.85	1.05	0.318434	0.999022	88.5233
25.71	129.192	127.62	104.426	121.004	134.636	140.038	0.000171711	0.029955	0.095319	22.3623	13.9475	4.81	1.22	0.343628	0.998062	104.07
25.72	129.259	127.696	104.526	121.091	134.708	140.117	0.000218694	0.033119	0.10072	21.5786	11.5717	5.56	1.9	0.36391	0.997123	89.6366
25.73	129.326	127.773	104.624	121.177	134.78	140.197	0.000268913	0.034973	0.10253	20.6273	9.57981	5.63	1.66	0.377819	0.993275	74.422
25.74	129.395	127.849	104.726	121.254	134.855	140.28	0.000249531	0.035152	0.10182	19.6747	10.2524	6.21	1.81	0.381258	0.990868	78.0264
25.75	129.465	127.925	104.846	121.342	134.927	140.362	0.000160268	0.034429	0.099704	19.114	15.6308	5.89	2.19	0.375108	0.98834	114.751
25.76	129.531	128.002	104.945	121.419	135.001	140.445	0.000101864	0.032963	0.096443	18.6878	23.7885	5.98	2.31	0.359948	0.984952	164.759
25.77	129.599	128.078	105.059	121.503	135.074	140.524	8.57599e-05	0.030836	0.09154	18.3504	26.8191	6.2	2.58	0.338699	0.983595	169.263
25.78	129.671	128.154	105.166	121.589	135.147	140.606	8.59858e-05	0.027805	0.086068	18.0238	25.1496	5	2.81	0.309919	0.986515	140.43
25.79	129.738	128.23	105.269	121.669	135.219	140.688	9.63244e-05	0.024064	0.080385	17.9314	20.9679	7.06	2.39	0.265692	0.989948	97.5682
25.8	129.804	128.307	105.381	121.753	135.288	140.766	0.000100281	0.021146	0.074905	17.9543	18.7676	8	2.3	0.237139	0.995871	77.1333
25.81	129.872	128.383	105.496	121.839	135.361	140.857	0.00010008	0.018798	0.069219	18.1527	17.3779	7.1	2.16	0.215508	0.998721	66.3203
25.82	129.939	128.459	105.59	121.917	135.433	140.938	9.19175e-05	0.017005	0.063182	18.3304	17.2708	5.7	2.72	0.212896	0.999186	65.0235
25.83	130.005	128.534	105.702	122	135.504	141.022	7.84864e-05	0.015418	0.056977	18.5719	18.2399	5.69	1.82	0.2154	0.999796	71.3194
25.84	130.076	128.61	105.803	122.088	135.574	141.102	7.2087e-05	0.014109	0.051169	18.6727	17.8347	5.77	2.44	0.214325	0.999308	69.9474
25.85	130.141	128.686	105.892	122.171	135.647	141.183	6.74586e-05	0.012636	0.045846	18.5884	17.0758	5.26	2.29	0.216835	0.998991	67.5985
25.86	130.208	128.762	106.011	122.253	135.719	141.272	6.14859e-05	0.011386	0.040779	18.6326	16.664	4.92	1.85	0.220338	0.999482	67.3862
25.87	130.276	128.837	106.129	122.336	135.79	141.358	5.90955e-05	0.01029	0.037307	18.5969	15.8618	4.69	2.51	0.220016	0.999594	64.5345
25.88	130.342	128.913	106.236	122.417	135.863	141.442	5.77478e-05	0.0095009	0.0347	18.7771	15.0977	5.64	2.09	0.218921	0.999599	62.6587
25.89	130.408	128.988	106.33	122.499	135.934	141.523	6.06221e-05	0.0089193	0.032879	18.7454	13.6271	5.2	1.78	0.221849	0.999558	57.4428
25.9	130.474	129.064	106.43	122.582	136.008	141.601	6.52531e-05	0.0084759	0.031323	18.7959	12.0609	5.67	2.23	0.22113	0.998836	51.101
25.91	130.542	129.139	106.54	122.66	136.08	141.684	6.34792e-05	0.008046	0.029951	18.8587	11.8549	5.76	1.36	0.221115	0.999133	49.9707
25.92	130.606	129.215	106.661	122.738	136.151	141.765	5.26955e-05	0.0077615	0.028987	18.9755	13.8212	5.79	1.21	0.21811	0.9995	57.5419
25.93	130.671	129.29	106.777	122.816	136.222	141.848	4.91735e-05	0.0074712	0.028572	18.8094	14.5991	6.23	1.71	0.210573	0.998907	57.712
25.94	130.739	129.365	106.901	122.893	136.291	141.932	5.07027e-05	0.0072144	0.028786	18.6277	14.2648	5.62	1.36	0.206822	0.999299	54.5888
25.95	130.806	129.44	107.003	122.973	136.364	142.008	5.09249e-05	0.0072281	0.02994	18.1787	14.772	5.76	2.69	0.196853	0.998433	52.923
25.96	130.872	129.515	107.123	123.059	136.435	142.077	5.2049e-05	0.0073287	0.032045	17.7859	15.4691	6.51	1.16	0.190909	0.99949	50.4851
25.97	130.938	129.59	107.237	123.14	136.51	142.144	5.09305e-05	0.0076263	0.035241	17.3128	17.3855	5.05	1.12	0.182913	0.999855	52.0945
25.98	131.003	129.665	107.35	123.217	136.577	142.228	5.15852e-05	0.0081763	0.039442	16.8572	19.211	4.31	1.04	0.177264	0.999908	53.8119
25.99	131.067	129.74	107.46	123.295	136.648	142.293	5.57841e-05	0.0090748	0.044003	16.4502	19.8193	5.35	1.04	0.17385	0.999949	52.5131
26	131.135	129.815	107.553	123.38	136.717	142.374	5.82073e-05	0.01004	0.048386	16.1244	20.8862	4.56	1.07	0.169944	0.999925	52.8164
26.01	131.201	129.889	107.649	123.458	136.786	142.451	5.97367e-05	0.010813	0.052644	15.8722	22.1424	5.56	1.14	0.166889	0.999858	53.8112
26.02	131.268	129.964	107.77	123.543	136.857	142.515	5.95194e-05	0.011683	0.056552	15.7043	23.873	5.16	1.19	0.164506	0.99984	56.1834
26.02	131.268	129.964	107.77	123.543	136.857	142.515	5.2473e-05	0.011435	0.054481	15.8921	26.0871	5.16	0.81	0.165456	0.999988	61.6279
26.03	131.336	130.039	107.896	123.622	136.924	142.591	5.37771e-05	0.012034	0.058914	15.6702	27.5257	3.99	0.84	0.162858	0.999978	62.5657
26.04	131.403	130.113	108.023	123.7	136.997	142.653	5.14029e-05	0.012727	0.062738	15.5708	30.6662	4.08	0.87	0.159851	0.999972	67.8911
26.05	131.467	130.188	108.131	123.779	137.069	142.73	5.40025e-05	0.013148	0.065755	15.5083	30.5937	5.87	0.87	0.158515	0.999972	66.9765
26.06	131.533	130.262	108.228	123.861	137.141	142.812	5.03029e-05	0.013562	0.068012	15.534	33.9711	4.91	0.82	0.158509	0.999969	74.4987
26.07	131.601	130.337	108.332	123.939	137.211	142.889	5.35787e-05	0.013735	0.069399	15.6273	32.5445	5.45	0.81	0.1582	0.999963	71.9689
26.08	131.664	130.411	108.451	124.017	137.279	142.959	5.44508e-05	0.01372	0.070148	15.7081	32.3689	5.49	0.8	0.157505	0.999983	71.9751
26.09	131.73	130.485	108.557	124.098	137.349	143.028	6.371e-05	0.013572	0.070398	15.7701	27.7632	7.72	0.78	0.156238	0.999955	61.827
26.1	131.795	130.559	108.677	124.18	137.422	143.111	6.24121e-05	0.013404	0.070387	15.8965	28.3362	6.09	0.76	0.154394	0.999987	63.124
26.11	131.862	130.633	108.807	124.26	137.492	143.185	6.10888e-05	0.013307	0.07039	15.9502	28.9512	6.29	0.72	0.153742	0.999983	64.6354
26.12	131.93	130.707	108.929	124.338	137.558	143.257	5.77833e-05	0.013255	0.070287	16.0244	30.5626	6.13	0.68	0.153334	0.999978	68.6479
26.13	131.997	130.781	109.044	124.418	137.63	143.322	5.69115e-05	0.013106	0.070013	16.0992	30.9098	7.04	0.7	0.152879	0.999969	69.8013
26.14	132.065	130.855	109.17	124.501	137.697	143.392	5.86228e-05	0.01306	0.069744	16.1751	29.8922	8.58	0.7	0.15216	0.999937	67.8047
26.15	132.132	130.929	109.283	124.583	137.761	143.469	6.12953e-05	0.013102	0.069823	16.2983	28.6212	13.47	0.73	0.152537	0.999952	65.7652
26.16	132.197	131.003	109.418	124.664	137.828	143.536	6.4395e-05	0.013489	0.070684	16.4472	27.5795	6.4	0.77	0.154743	0.999948	65.3063
26.17	132.263	131.077	109.526	124.742	137.896	143.607	6.70078e-05	0.014171	0.072617	16.6448	27.2289	3.49	0.79	0.162459	0.999906	68.9636
26.18	132.329	131.151	109.652	124.829	137.962	143.676	6.70156e-05	0.015039	0.074713	16.9676	28.0115	4	1.25	0.173873	0.999946	77.7729
26.19	132.394	131.224	109.776	124.904	138.031	143.746	7.56258e-05	0.015876	0.076419	17.4288	25.3892	6.47	1.6	0.18758	0.999944	79.3724
26.2	132.461	131.298	109.901	124.98	138.101	143.816	8.79605e-05	0.016542	0.077361	18.0599	22.0979	5.85	1.9	0.199702	0.999741	77.1483
26.21	132.525	131.372	110.036	125.057	138.167	143.888	0.000113535	0.01682	0.076966	18.6856	17.0328	8.61	2.54	0.211305	0.999733	66.0932
26.22	132.592	131.445	110.168	125.132	138.238	143.958	0.000138016	0.016588	0.074315	19.3444	13.5289	8.03	3.03	0.215488	0.999817	56.2057
26.23	132.655	131.519	110.293	125.212	138.303	144.029	0.000148789	0.015772	0.069805	19.8952	11.7878	6.31	3.24	0.224653	0.999791	52.4958
26.24	132.721	131.593	110.413	125.293	138.366	144.108	0.000128534	0.014589	0.063694	20.4769	12.4508	5.05	3.36	0.230232	0.999813	58.5349
26.25	132.786	131.666	110.528	125.374	138.434	144.174	9.76646e-05	0.013038	0.056532	20.9768	14.5437	5.34	3.66	0.235485	0.999751	71.7568
26.26	132.851	131.74	110.632	125.455	138.5	144.235	7.58269e-05	0.01133	0.04959	21.038	16.4319	5.43	4.27	0.234495	0.999628	81.4553
26.27	132.914	131.813	110.774	125.538	138.564	144.301	7.14294e-05	0.0098114	0.042573	20.9807	14.9753	5.12	4.85	0.23195	0.999448	72.9643
26.28	132.981	131.887	110.893	125.621	138.63	144.372	6.37156e-05	0.0086964	0.037357	20.6734	14.7314	3.6	5.16	0.227073	0.999227	70.8446
26.29	133.046	131.96	111.011	125.697	138.695	144.445	6.69971e-05	0.0084185	0.033987	20.6312	12.746	4.5	5.09	0.222996	0.998501	62.8654
26.3	133.113	132.034	111.126	125.777	138.763	144.512	7.27711e-05	0.0087474	0.032557	20.7867	11.2409	5.28	5.08	0.235288	0.994783	61.4392
26.31	133.179	132.107	111.245	125.851	138.829	144.576	9.10455e-05	0.0092608	0.032142	21.255	8.87016	5.97	5.4	0.256352	0.991414	55.1054
26.32	133.242	132.18	111.348	125.93	138.892	144.641	0.000116843	0.0098545	0.032344	21.801	6.95515	5.78	5.83	0.275063	0.987431	47.7879
26.33	133.311	132.254	111.463	126.01	138.962	144.718	0.000139319	0.010115	0.032802	22.4315	5.91573	5.1	6.15	0.280425	0.986627	42.181
26.34	133.376	132.327	111.585	126.088	139.029	144.784	0.000137535	0.010344	0.033555	22.9335	6.13	6.65	6.02	0.285278	0.986752	44.8983
26.35	133.444	132.401	111.706	126.167	139.096	144.846	0.000108246	0.010473	0.034489	23.5014	8.00544	3.08	6.02	0.283558	0.988777	58.4048
26.36	133.511	132.474	111.833	126.244	139.163	144.915	8.62114e-05	0.010518	0.035797	24.2348	10.4328	5.99	5.75	0.276031	0.993131	73.8963
26.37	133.575	132.547	111.966	126.329	139.231	144.981	8.22403e-05	0.010323	0.037796	25.0246	11.5472	4.14	5.34	0.261814	0.997002	76.9416
26.38	133.641	132.621	112.082	126.413	139.294	145.051	8.73141e-05	0.010349	0.040722	26.1416	11.7182	5.34	4.45	0.25404	0.998865	74.5447
26.39	133.709	132.694	112.212	126.495	139.357	145.116	9.34818e-05	0.010799	0.044179	27.0966	11.8742	6.46	4.02	0.243478	0.999931	72.5007
26.4	133.776	132.768	112.332	126.573	139.423	145.183	0.000117946	0.011488	0.047758	27.7486	10.1737	4.96	3.54	0.243436	0.999824	62.1063
26.41	133.84	132.841	112.458	126.653	139.489	145.252	0.000135596	0.012073	0.050762	28.0877	9.40608	11.47	3.21	0.239675	0.999841	56.7989
26.42	133.909	132.915	112.591	126.727	139.554	145.318	0.000136674	0.012488	0.052427	28.3715	9.63797	7.27	3.09	0.240065	0.999908	58.8553
26.43	133.975	132.988	112.706	126.807	139.62	145.384	0.000129615	0.012882	0.052921	28.447	10.2586	5.49	2.86	0.249227	0.999812	65.0921
26.44	134.042	133.062	112.831	126.889	139.688	145.452	0.000111976	0.013235	0.052332	28.7905	11.7424	7.31	2.96	0.25919	0.999804	78.5667
26.45	134.108	133.135	112.945	126.969	139.753	145.529	9.78848e-05	0.013381	0.050865	29.2674	13.0563	5.68	2.91	0.272281	0.999733	93.3659
26.46	134.178	133.209	113.068	127.049	139.82	145.609	9.65701e-05	0.013386	0.048109	29.9388	12.517	4.89	2.99	0.288866	0.999724	95.7418
26.47	134.246	133.283	113.18	127.133	139.884	145.67	0.000117039	0.012941	0.04477	30.0668	9.61109	6.13	3.13	0.307418	0.999431	78.4822
26.48	134.313	133.356	113.296	127.216	139.951	145.733	0.000120586	0.012279	0.041258	30.7228	8.5966	6.89	2.76	0.317782	0.999691	73.2753
26.49	134.379	133.43	113.445	127.298	140.015	145.796	0.000103825	0.011364	0.038602	31.1329	9.34167	4.48	2.57	0.319591	0.999631	81.2405
26.5	134.445	133.504	113.565	127.377	140.081	145.861	8.90743e-05	0.010733	0.036207	31.2602	10.2131	6.49	2.57	0.317464	0.999356	88.8865
26.51	134.51	133.578	113.715	127.457	140.148	145.933	8.07222e-05	0.0098977	0.033925	31.0134	10.5595	5.41	2.24	0.305848	0.99984	90.7482
26.52	134.578	133.651	113.847	127.538	140.216	145.995	8.22155e-05	0.008819	0.032473	30.5576	9.92398	4.53	2.08	0.281314	0.999682	78.8817
26.53	134.646	133.725	113.975	127.621	140.281	146.062	0.000101644	0.0079918	0.031471	30.3473	7.7794	4.96	1.61	0.254501	0.99992	56.4195
26.54	134.716	133.799	114.097	127.703	140.348	146.123	0.00011774	0.0073549	0.031024	30.3213	6.62051	6.3	2.14	0.232254	0.999852	44.6663
26.55	134.781	133.873	114.212	127.78	140.416	146.192	0.000114212	0.0071423	0.031587	30.6108	6.94889	5.07	2.07	0.218014	0.999322	43.7023
26.56	134.85	133.947	114.327	127.86	140.479	146.258	0.000109803	0.00728	0.033133	31.0725	7.58167	7.25	1.75	0.206592	0.999255	46.9579
26.57	134.92	134.021	114.454	127.938	140.545	146.319	0.000112889	0.0079383	0.034564	31.3649	7.6929	7.52	2.42	0.212066	0.998421	49.6178
26.58	134.99	134.095	114.586	128.016	140.611	146.384	9.76541e-05	0.008874	0.036793	31.5732	9.46655	8.25	3.52	0.218269	0.997399	63.3419
26.59	135.056	134.169	114.696	128.1	140.674	146.452	9.39363e-05	0.0092127	0.039285	31.7503	10.5078	7.61	3.39	0.212681	0.996016	68.2654
26.6	135.123	134.244	114.82	128.185	140.739	146.519	0.000113546	0.0093476	0.040391	31.4629	8.93781	9.6	3.62	0.207805	0.995191	56.3236
26.61	135.19	134.318	114.953	128.266	140.806	146.584	0.00013736	0.0093119	0.04094	30.6975	7.48865	8.23	3.78	0.20693	0.9942	45.2816
26.62	135.256	134.392	115.08	128.348	140.873	146.646	0.000105819	0.0093856	0.041506	30.8678	9.85519	7.15	3.58	0.203732	0.994983	58.4169
26.63	135.327	134.467	115.214	128.428	140.939	146.712	7.73762e-05	0.0095203	0.043738	31.1361	14.2026	5.33	3.62	0.201237	0.997021	80.999
26.64	135.394	134.541	115.343	128.513	141.008	146.776	8.48935e-05	0.0094151	0.044427	31.337	13.1489	5	3.38	0.200291	0.998493	73.1846
26.65	135.462	134.616	115.459	128.595	141.074	146.842	0.000124776	0.0087147	0.043013	30.9217	8.66133	4.99	2.93	0.194611	0.999348	45.7443
26.66	135.533	134.69	115.575	128.679	141.139	146.909	0.000157618	0.0076572	0.040141	30.1768	6.39881	4.87	2.89	0.185851	0.999777	31.3606
26.67	135.599	134.765	115.679	128.76	141.205	146.972	0.000129429	0.0070311	0.038062	29.5418	7.38886	4.78	2.89	0.183349	0.999849	34.7874
26.68	135.667	134.84	115.799	128.84	141.271	147.038	9.21701e-05	0.0067246	0.035718	28.3758	9.73675	5.62	2.65	0.180534	0.999144	44.969
26.69	135.733	134.914	115.921	128.925	141.334	147.103	6.92512e-05	0.0064317	0.031943	27.5471	11.5895	5.34	2.23	0.189976	0.999747	53.7925
26.7	135.805	134.989	116.055	129.009	141.399	147.171	5.05152e-05	0.0060789	0.027644	25.3596	13.7498	5.77	1.7	0.205447	0.999903	65.3526
26.71	135.874	135.064	116.179	129.093	141.464	147.24	4.69895e-05	0.0057839	0.023985	23.1841	12.825	5.77	2.87	0.215875	0.998297	61.3223
26.72	135.944	135.139	116.293	129.175	141.529	147.306	5.09445e-05	0.0055875	0.021536	21.5192	10.6215	6.1	1.94	0.226419	0.999772	49.9014
26.73	136.014	135.214	116.408	129.26	141.596	147.373	6.23988e-05	0.0059786	0.020308	21.0184	8.17726	7.17	1.22	0.241503	0.998645	42.0169
26.74	136.083	135.289	116.523	129.347	141.661	147.429	5.5782e-05	0.0068888	0.020099	21.3424	9.0531	7.9	1.45	0.259415	0.996771	52.9812
26.75	136.154	135.365	116.661	129.429	141.722	147.501	5.86503e-05	0.0074104	0.020494	22.0294	8.77958	8.62	1.98	0.266594	0.994533	56.2845
26.76	136.224	135.44	116.803	129.51	141.786	147.568	7.91496e-05	0.0077349	0.020544	23.0964	6.52158	7.1	2.45	0.262421	0.992277	43.9863
26.77	136.296	135.515	116.942	129.595	141.852	147.634	0.000100316	0.0074413	0.019726	23.6676	4.94067	7.93	2.77	0.260909	0.990498	34.3016
26.78	136.367	135.591	117.066	129.685	141.918	147.7	8.46688e-05	0.0069866	0.018518	24.3461	5.49525	8.15	3.17	0.253047	0.988604	38.6317
26.79	136.437	135.666	117.186	129.764	141.981	147.764	5.35847e-05	0.0063794	0.017544	24.7827	8.22631	7.7	3.55	0.24419	0.986294	57.2384
26.8	136.509	135.742	117.33	129.848	142.049	147.826	3.99332e-05	0.0056978	0.016232	24.707	10.213	6.09	3.71	0.237108	0.986593	69.4484
26.81	136.581	135.817	117.447	129.931	142.111	147.885	3.7285e-05	0.0047657	0.014464	24.0958	9.747	6.41	3.1	0.221279	0.987769	60.0751
26.89	137.146	136.425	118.47	130.604	142.635	148.394	8.06792e-05	0.010942	0.042089	21.1762	13.1076	3.73	0.87	0.210559	0.999913	60.9178
26.9	137.218	136.501	118.609	130.691	142.703	148.459	7.67163e-05	0.011454	0.044236	21.1054	14.4879	3.93	0.74	0.210489	0.999966	67.3221
26.91	137.29	136.577	118.742	130.775	142.77	148.519	7.36356e-05	0.01185	0.045063	21.0039	15.3762	4.45	0.81	0.213488	0.999938	72.1282
26.92	137.362	136.654	118.868	130.863	142.836	148.59	7.67055e-05	0.0119	0.045553	20.9948	14.9213	4.41	0.71	0.216309	0.999922	71.1057
26.93	137.435	136.73	118.995	130.944	142.903	148.659	7.53989e-05	0.012257	0.04613	20.9351	15.3722	5.34	1.16	0.218759	0.999794	72.9865
26.94	137.506	136.807	119.146	131.027	142.968	148.719	7.31847e-05	0.012645	0.04727	21.0441	16.2286	5.28	0.69	0.221799	0.999876	78.7582
26.95	137.579	136.883	119.268	131.114	143.034	148.785	7.62709e-05	0.013469	0.049057	21.2133	16.1607	4.7	0.68	0.224797	0.999799	80.2127
26.96	137.653	136.96	119.395	131.201	143.102	148.856	8.77368e-05	0.014138	0.051071	21.3742	14.6255	4.07	0.58	0.233071	0.999871	76.0582
26.97	137.725	137.037	119.529	131.288	143.17	148.914	9.98691e-05	0.015018	0.05321	21.616	13.3869	3.83	0.8	0.236969	0.999583	70.4792
26.98	137.799	137.113	119.644	131.372	143.238	148.984	0.000104275	0.016107	0.055681	21.8763	13.4166	4.17	0.8	0.245014	0.999814	74.7572
26.99	137.867	137.19	119.757	131.461	143.303	149.045	0.000106691	0.017477	0.058561	22.3198	13.791	4.51	0.76	0.254104	0.999846	80.3722
27	137.939	137.267	119.887	131.548	143.369	149.101	0.000114853	0.018769	0.061445	22.7296	13.4419	5.86	0.84	0.26681	0.999802	83.174
27.01	138.01	137.344	120.014	131.635	143.436	149.169	0.000129406	0.020545	0.063712	23.1311	12.3704	5.31	0.73	0.289912	0.999714	83.319
27.02	138.082	137.421	120.143	131.725	143.504	149.233	0.000146145	0.022268	0.065409	23.4352	11.2453	6.51	0.67	0.314311	0.999713	82.1375
27.03	138.157	137.498	120.268	131.813	143.573	149.306	0.000154525	0.023226	0.066398	23.7929	10.7962	5.85	0.58	0.326314	0.999834	82.8279
27.04	138.228	137.575	120.39	131.896	143.641	149.37	0.000175026	0.023466	0.066465	23.9739	9.54127	7.71	0.92	0.329788	0.999739	74.3602
27.05	138.299	137.652	120.516	131.988	143.71	149.434	0.000195523	0.022966	0.064315	24.1587	8.26478	4.77	0.56	0.335983	0.999782	66.0229
27.06	138.374	137.729	120.629	132.077	143.775	149.5	0.000157406	0.021979	0.060795	24.036	9.70426	5.23	0.82	0.344914	0.999672	78.9739
27.07	138.446	137.806	120.734	132.167	143.846	149.568	0.000101374	0.020489	0.057005	24.0325	14.1287	4.66	0.92	0.34449	0.99961	115.029
27.08	138.519	137.884	120.855	132.256	143.913	149.629	8.84013e-05	0.01877	0.052258	24.0176	14.8529	5.37	0.97	0.340574	0.99946	120.157
27.09	138.592	137.961	120.968	132.343	143.978	149.689	8.06921e-05	0.016492	0.046643	23.9897	14.5235	6.17	1.51	0.328934	0.999523	113.642
27.1	138.665	138.038	121.113	132.433	144.045	149.746	7.40567e-05	0.013832	0.04126	23.9311	13.9985	7.32	1.63	0.305619	0.99956	102.932
27.11	138.739	138.116	121.211	132.522	144.113	149.816	7.09738e-05	0.011747	0.036565	24.122	12.9445	7.5	1.97	0.28993	0.999492	90.6827
27.12	138.811	138.193	121.342	132.609	144.18	149.878	6.68156e-05	0.01018	0.032314	24.3679	12.1515	6.75	1.46	0.280187	0.999822	84.7766
27.13	138.883	138.271	121.469	132.697	144.245	149.936	5.88546e-05	0.0088553	0.028391	24.4904	12.1204	7.89	2.36	0.274696	0.999426	82.7769
27.14	138.959	138.348	121.584	132.786	144.311	150.003	5.33382e-05	0.0079396	0.02494	24.438	11.7483	8.67	1.96	0.287169	0.999961	83.3362
27.15	139.035	138.426	121.7	132.873	144.379	150.063	4.54229e-05	0.0072911	0.022499	24.2182	12.4453	9.05	1.59	0.287617	0.999343	86.474
27.16	139.104	138.503	121.837	132.96	144.447	150.132	3.61636e-05	0.0070242	0.021288	23.6777	14.7904	8.51	2.49	0.295817	0.999682	103.062
27.17	139.178	138.581	121.992	133.051	144.514	150.187	3.35018e-05	0.0072403	0.021395	23.0325	16.0458	9.67	1.51	0.29876	0.99989	111.943
27.18	139.255	138.659	122.128	133.139	144.583	150.251	4.36466e-05	0.0075867	0.022387	22.6396	12.8873	9.59	1.31	0.298623	0.999947	88.6231
27.19	139.327	138.736	122.266	133.23	144.654	150.314	5.57665e-05	0.0078634	0.02375	22.5412	10.7006	7.98	1.18	0.293055	0.999964	71.8962
27.2	139.406	138.814	122.406	133.311	144.719	150.378	7.31805e-05	0.0081384	0.025183	22.6724	8.64628	9.75	1.15	0.285318	0.999954	56.9264
27.21	139.478	138.892	122.518	133.402	144.788	150.442	7.29841e-05	0.0086383	0.02661	22.7656	9.1608	8.67	1.11	0.284863	0.999987	60.1761
27.22	139.552	138.97	122.65	133.495	144.855	150.496	6.52215e-05	0.0090127	0.028407	22.8876	10.9434	6.21	1.09	0.284329	0.999943	72.1709
27.23	139.624	139.048	122.763	133.583	144.922	150.548	5.48943e-05	0.0097662	0.03016	23.2338	13.8045	7.61	1.32	0.289636	0.999895	93.1845
27.24	139.696	139.125	122.884	133.672	144.991	150.608	5.97479e-05	0.010455	0.032011	23.5512	13.4615	10.63	1.89	0.311338	0.999711	98.6211
27.25	139.77	139.203	123.014	133.757	145.061	150.671	6.96483e-05	0.012235	0.034673	23.856	12.5083	7.2	1.54	0.339695	0.999623	101.654
27.26	139.843	139.281	123.118	133.848	145.132	150.73	8.42122e-05	0.015242	0.038837	24.2886	11.5874	5.92	1.26	0.391856	0.998372	110.491
27.27	139.916	139.359	123.22	133.937	145.199	150.792	0.000109337	0.019364	0.044288	24.7335	10.1774	5.17	0.9	0.451435	0.998638	114.079
27.28	139.986	139.437	123.352	134.026	145.263	150.852	0.000155179	0.023682	0.050332	25.4205	8.14947	4.81	1.2	0.489097	0.99871	101.799
27.29	140.061	139.515	123.463	134.112	145.334	150.909	0.000242478	0.028055	0.056528	26.1735	5.85745	5.23	0.96	0.518259	0.999273	78.6753
27.3	140.135	139.593	123.591	134.203	145.404	150.974	0.00030045	0.032497	0.062063	26.8011	5.19013	5.24	1.46	0.549677	0.999527	75.0841
27.31	140.205	139.671	123.73	134.291	145.47	151.037	0.000260774	0.03618	0.067193	27.5821	6.47406	4.9	1.06	0.562613	0.999533	97.479
27.32	140.281	139.749	123.849	134.378	145.539	151.095	0.000265844	0.037905	0.071157	28.1933	6.72523	4.97	1.29	0.552558	0.999651	100.788
27.33	140.354	139.827	123.962	134.471	145.608	151.162	0.000327584	0.037467	0.072139	28.2507	5.53304	5.14	1.16	0.540305	0.999594	80.9501
27.34	140.431	139.905	124.074	134.556	145.677	151.229	0.000278875	0.035292	0.071586	28.0811	6.44964	4.85	1.22	0.511873	0.999655	89.126
27.35	140.505	139.983	124.19	134.644	145.742	151.288	0.00018782	0.032164	0.071179	27.7958	9.52199	5.44	1.33	0.46876	0.999592	119.338
27.36	140.581	140.062	124.316	134.738	145.813	151.353	0.000151216	0.029175	0.069843	27.357	11.6049	4.96	1.2	0.427372	0.99987	132.301
27.37	140.656	140.14	124.423	134.83	145.881	151.407	0.000125659	0.026094	0.066957	26.5531	13.3881	6.38	1.13	0.396776	0.999714	138.589
27.38	140.731	140.218	124.529	134.924	145.952	151.466	0.000113085	0.022798	0.064104	25.7666	14.2429	5.06	0.8	0.354783	0.999758	131.22
27.39	140.805	140.296	124.648	135.013	146.024	151.527	0.000105363	0.020183	0.062114	25.1446	14.8122	4.29	0.8	0.317571	0.999823	121.039
27.4	140.878	140.374	124.761	135.1	146.094	151.591	9.85436e-05	0.018742	0.060582	24.6714	15.4466	2.2	0.88	0.297417	0.999859	117.593
27.41	140.953	140.453	124.872	135.188	146.165	151.656	9.96372e-05	0.018475	0.059293	24.4731	14.952	3.71	1.06	0.295361	0.999786	112.177
27.42	141.029	140.531	124.996	135.274	146.235	151.715	9.69981e-05	0.018324	0.058337	24.2235	15.1112	4.12	0.82	0.293862	0.999881	112.94
27.43	141.102	140.609	125.106	135.364	146.304	151.784	9.94415e-05	0.018214	0.057676	24.1914	14.5728	4.3	0.9	0.292747	0.999825	108.526
27.44	141.175	140.687	125.229	135.449	146.376	151.846	9.74128e-05	0.018233	0.057147	24.0688	14.7399	3.14	0.93	0.293993	0.999844	109.924
27.45	141.254	140.766	125.359	135.537	146.442	151.911	9.81026e-05	0.01837	0.057004	24.0299	14.5996	4.7	0.93	0.294855	0.999829	109.161
27.46	141.328	140.844	125.467	135.628	146.516	151.972	9.85318e-05	0.018563	0.057182	23.9725	14.5814	3.78	0.91	0.295622	0.999806	109.183
27.47	141.402	140.922	125.585	135.712	146.586	152.032	0.000102926	0.018768	0.057399	23.95	14.0118	4.94	0.91	0.296779	0.999774	105.347
27.48	141.479	141.001	125.712	135.799	146.659	152.1	0.000112005	0.019016	0.057527	23.9587	12.9048	4.46	0.89	0.298957	0.999733	97.9152
27.49	141.557	141.079	125.817	135.889	146.73	152.155	0.000117495	0.019197	0.057846	23.9666	12.3701	4.62	0.9	0.300399	0.999703	94.4638
27.5	141.632	141.157	125.923	135.976	146.799	152.214	0.000123443	0.019477	0.058581	23.9352	11.9236	5.69	0.9	0.299765	0.999699	90.7868
27.51	141.709	141.236	126.031	136.066	146.874	152.275	0.000114629	0.019614	0.059452	23.8908	13.0313	6.4	0.89	0.296964	0.999684	98.2475
27.52	141.782	141.314	126.125	136.154	146.944	152.335	0.000104727	0.019798	0.060264	23.8849	14.4583	6.86	0.88	0.293544	0.999727	107.718
27.53	141.86	141.392	126.215	136.243	147.014	152.393	0.000103376	0.020008	0.061311	23.7377	14.9017	4.19	0.85	0.290001	0.999826	108.884
27.54	141.934	141.471	126.306	136.327	147.087	152.448	0.000105379	0.02005	0.062247	23.7199	14.8416	4.48	0.84	0.284766	0.999861	106.445
27.55	142.008	141.549	126.415	136.411	147.158	152.51	0.000104707	0.020133	0.063157	23.5754	15.1553	4.74	0.84	0.280995	0.999878	106.66
27.56	142.081	141.628	126.526	136.499	147.229	152.57	9.98691e-05	0.020202	0.063888	23.4929	16.0733	4.31	0.83	0.277775	0.99991	111.296
27.57	142.158	141.706	126.645	136.58	147.298	152.632	0.0001012	0.020328	0.064669	23.3169	16.0558	4.11	0.8	0.27588	0.999928	109.753
27.58	142.235	141.785	126.759	136.665	147.37	152.696	9.78755e-05	0.020681	0.065485	23.1641	16.8107	4.17	0.78	0.276161	0.999906	114.482
27.59	142.309	141.863	126.878	136.75	147.441	152.755	9.70072e-05	0.021081	0.066214	22.9901	17.1499	3.97	1.03	0.281369	0.999922	118.414
27.6	142.385	141.941	127.001	136.839	147.515	152.819	9.94209e-05	0.021637	0.066937	22.8375	16.9163	4.59	0.72	0.285522	0.999845	117.51
27.61	142.46	142.02	127.099	136.921	147.586	152.879	0.000102291	0.021926	0.067338	22.71	16.5402	5.01	0.73	0.28923	0.9998	116.071
27.62	142.535	142.098	127.206	137.008	147.659	152.939	0.000102712	0.021825	0.066709	22.6495	16.3185	4.65	0.75	0.291446	0.999763	115.128
27.63	142.609	142.177	127.303	137.09	147.732	153	0.000101613	0.021085	0.064395	22.6274	15.9228	4.64	0.73	0.291984	0.999787	112.377
27.64	142.689	142.255	127.401	137.177	147.802	153.06	9.8089e-05	0.019606	0.06029	22.5832	15.4434	6.31	1.25	0.290922	0.999745	107.81
27.65	142.765	142.334	127.493	137.26	147.874	153.118	8.64347e-05	0.017707	0.054615	22.6344	15.876	5.15	1.02	0.29078	0.999527	111.159
27.66	142.84	142.413	127.588	137.343	147.947	153.192	6.89964e-05	0.016001	0.048135	22.7455	17.5288	4.81	1.13	0.297548	0.999725	125.014
27.67	142.917	142.491	127.708	137.427	148.02	153.25	5.29117e-05	0.013847	0.04152	23.1844	19.7162	9.15	1.68	0.295793	0.999529	141.156
27.68	142.993	142.57	127.801	137.513	148.092	153.313	5.18005e-05	0.011594	0.035099	23.6465	17.0246	10.31	1.72	0.2932	0.999904	122.819
27.69	143.07	142.648	127.886	137.596	148.163	153.371	6.45826e-05	0.00951	0.028841	24.3475	11.2205	13.24	1.31	0.289318	0.999493	80.3172
27.7	143.147	142.727	127.982	137.678	148.237	153.435	6.25998e-05	0.0076275	0.023645	25.3326	9.49037	10.24	2.35	0.279591	0.999597	67.2781
27.71	143.225	142.805	128.092	137.762	148.311	153.492	5.22567e-05	0.0064291	0.020661	25.7596	9.93406	9.34	1.3	0.270063	0.999541	68.5157
27.72	143.3	142.884	128.2	137.849	148.39	153.556	4.42877e-05	0.0058455	0.018763	25.6896	10.6448	9.66	2.5	0.273553	0.999795	73.0091
27.73	143.378	142.962	128.295	137.931	148.467	153.616	3.48455e-05	0.005696	0.017653	25.2087	12.7288	7.32	1.98	0.279229	0.999943	88.0543
27.74	143.457	143.041	128.408	138.014	148.539	153.67	3.15325e-05	0.0056657	0.017613	24.0681	14.0343	6.9	1.98	0.273136	0.999867	92.3048
27.75	143.535	143.12	128.499	138.096	148.614	153.73	3.65954e-05	0.0058122	0.018378	22.995	12.6179	7.05	1.97	0.263964	0.999963	77.7147
27.76	143.615	143.198	128.589	138.178	148.686	153.795	4.16853e-05	0.0061837	0.019788	22.119	11.9271	6.57	1.77	0.258939	0.999954	69.8279
27.77	143.693	143.277	128.681	138.257	148.763	153.855	4.91549e-05	0.00674	0.021562	21.7822	11.0215	5.38	1.62	0.257201	0.999952	63.2877
27.78	143.77	143.356	128.784	138.339	148.837	153.917	5.88407e-05	0.007319	0.022955	21.8626	9.80203	5.58	1.5	0.257735	0.999941	56.6733
27.79	143.85	143.434	128.883	138.42	148.911	153.98	5.9289e-05	0.0074019	0.023517	22.1121	9.96608	5.52	1.48	0.257501	0.999921	58.0765
27.8	143.928	143.513	128.975	138.504	148.989	154.045	6.45907e-05	0.0071721	0.022775	22.2629	8.85942	2.39	1.53	0.259425	0.999891	52.0973
27.81	144.004	143.592	129.079	138.589	149.065	154.113	5.48887e-05	0.0066621	0.020519	22.5663	9.3927	4.29	1.63	0.267477	0.999754	57.4016
27.82	144.083	143.67	129.173	138.668	149.14	154.176	3.41726e-05	0.0058566	0.018104	23.0349	13.3111	4.16	1.8	0.271104	0.999697	83.4763
[truncated: 5,717 more rows]

## Sheet: HTMS
Temperature	JUNIN_09	JUNIN_15	JUNIN_21	JUNIN_29	JUNIN_33	JUNIN_43	JUNIN_46	JUNIN_49	JUNIN_55	JUNIN_61	JUNIN_67	JUNIN_71	JUNIN_81	JUNIN_87	JUNIN_93	JUNIN_99
25	#N/A	#N/A	#N/A	#N/A	#N/A	#N/A	#N/A	#N/A	#N/A	#N/A	#N/A	#N/A	#N/A	#N/A	#N/A	#N/A
26	#N/A	#N/A	#N/A	#N/A	#N/A	#N/A	0.975837	#N/A	#N/A	#N/A	#N/A	#N/A	#N/A	#N/A	#N/A	#N/A
27	#N/A	#N/A	0.943502	#N/A	#N/A	#N/A	0.976066	#N/A	1	0.996149	#N/A	#N/A	0.943248	#N/A	#N/A	0.896114
28	#N/A	0.936435	0.94402	#N/A	#N/A	#N/A	0.977465	0.993066	0.980753	0.983312	0.924625	0.704123	0.917629	1	1	0.941984
29	#N/A	0.930818	0.944513	#N/A	0.899361	#N/A	0.981591	0.974451	0.974734	0.974929	0.908768	0.787708	0.90334	0.843938	1.00265	0.987855
30	0.931047	0.900443	0.944981	0.948107	0.929474	0.972055	0.985718	0.960334	0.968714	0.968455	0.892911	0.795233	0.89499	0.874583	1.00511	0.961522
31	0.868934	0.870069	0.945448	0.920444	0.94389	0.943185	0.988432	0.946217	0.968337	0.961981	0.888552	0.688667	0.895547	0.872201	1.00757	0.904246
32	0.838663	0.845437	0.94589	0.897945	0.934758	0.915544	0.985495	0.94505	0.968586	0.962668	0.889121	0.582101	0.896104	0.855665	0.99043	0.84697
33	0.856157	0.872489	0.946294	0.882316	0.925627	0.899359	0.982557	0.945321	0.968836	0.968129	0.88969	0.522301	0.89666	0.839129	0.943886	0.795467
34	0.87365	0.89954	0.946698	0.882719	0.922184	0.890812	0.979619	0.945593	0.969073	0.973591	0.890259	0.571623	0.897147	0.832341	0.897341	0.795927
35	0.891144	0.926591	0.947102	0.883122	0.922533	0.882265	0.978542	0.945864	0.969283	0.979052	0.890752	0.620945	0.897615	0.848302	0.852733	0.796386
36	0.877285	0.936212	0.941633	0.883524	0.922883	0.873718	0.981807	0.94609	0.969492	0.976482	0.891226	0.670267	0.898084	0.864262	0.812643	0.796845
37	0.863426	0.928402	0.934696	0.883891	0.923232	0.874085	0.985072	0.946315	0.969702	0.965881	0.8917	0.686399	0.898553	0.880223	0.772553	0.797305
38	0.849567	0.920593	0.927758	0.884221	0.923529	0.874452	0.988336	0.94654	0.969903	0.95528	0.892174	0.688305	0.893263	0.884266	0.732463	0.814125
39	0.83715	0.912783	0.920821	0.884551	0.92382	0.87482	0.989098	0.946765	0.970074	0.944679	0.892584	0.690212	0.885505	0.870433	0.750094	0.832763
40	0.837708	0.89511	0.920377	0.884882	0.924111	0.875187	0.986104	0.942932	0.970244	0.943815	0.892966	0.692119	0.877747	0.8566	0.792463	0.8514
41	0.838265	0.870861	0.920655	0.885205	0.924396	0.875508	0.98311	0.938648	0.970415	0.949444	0.893349	0.693806	0.869989	0.842766	0.834832	0.867379
42	0.838823	0.846612	0.920932	0.885466	0.924632	0.875799	0.980116	0.934364	0.970585	0.955073	0.893731	0.695347	0.862091	0.833232	0.877201	0.859423
43	0.839381	0.822363	0.92121	0.885726	0.924869	0.87609	0.978668	0.93008	0.970721	0.960702	0.891377	0.696888	0.853865	0.833729	0.878476	0.851467
44	0.839824	0.822034	0.930591	0.885986	0.925105	0.87638	0.978766	0.928895	0.970857	0.958391	0.882637	0.698429	0.84564	0.834225	0.879751	0.843511
45	0.840267	0.831957	0.939973	0.886247	0.925331	0.874998	0.978864	0.929039	0.970993	0.952677	0.873898	0.699753	0.837414	0.834721	0.881027	0.835555
46	0.84071	0.84188	0.949354	0.881489	0.925517	0.866923	0.978962	0.929183	0.971582	0.946964	0.865158	0.700984	0.831029	0.835207	0.882134	0.852322
47	0.828539	0.847914	0.942946	0.874581	0.925703	0.858849	0.981072	0.929327	0.976241	0.941835	0.857315	0.702215	0.84121	0.835595	0.883169	0.871835
48	0.702842	0.848115	0.934784	0.867672	0.92589	0.850775	0.984525	0.925277	0.980901	0.941964	0.857545	0.703419	0.85139	0.835982	0.884205	0.891349
49	0.577144	0.848315	0.926622	0.860764	0.928227	0.845174	0.987977	0.920178	0.985561	0.942093	0.857774	0.704387	0.861571	0.83637	0.885176	0.899438
50	0.451446	0.848515	0.918036	0.857384	0.935586	0.845345	0.991429	0.91508	0.983379	0.942222	0.858003	0.705354	0.866751	0.845431	0.885998	0.880869
51	0.447117	0.85897	0.909027	0.857534	0.942944	0.845516	0.987914	0.912122	0.974356	0.942336	0.856112	0.706322	0.866931	0.863165	0.88682	0.8623
52	0.564157	0.869424	0.900017	0.857684	0.950302	0.845687	0.984399	0.917724	0.965333	0.942434	0.845737	0.707127	0.86711	0.880899	0.897043	0.843732
53	0.681197	0.879879	0.898318	0.857834	0.953308	0.845839	0.980884	0.923326	0.956311	0.942533	0.835362	0.707863	0.86729	0.895138	0.944873	0.82377
54	0.786553	0.881031	0.907583	0.857946	0.953412	0.845964	0.979504	0.928928	0.955463	0.941946	0.824988	0.708598	0.867426	0.877926	0.992703	0.802881
55	0.786748	0.881149	0.916849	0.858054	0.953516	0.846089	0.979547	0.925684	0.955523	0.935194	0.82761	0.709271	0.867558	0.860713	1.04053	0.781991
56	0.786943	0.881268	0.923358	0.858162	0.95362	0.846213	0.979591	0.920228	0.955583	0.928441	0.838898	0.709796	0.867689	0.843501	0.987063	0.770459
57	0.787138	0.874153	0.923438	0.856507	0.953692	0.8463	0.979631	0.914773	0.955634	0.921689	0.850186	0.710322	0.862025	0.838446	0.933592	0.780759
58	0.787272	0.863939	0.923517	0.847798	0.953765	0.846386	0.979661	0.911516	0.955676	0.92174	0.856998	0.710847	0.850565	0.8386	0.879264	0.791058
59	0.787406	0.853724	0.923593	0.839089	0.953837	0.846472	0.979691	0.911558	0.955717	0.921791	0.845911	0.711209	0.839106	0.838755	0.821508	0.801358
60	0.78754	0.856511	0.923644	0.830381	0.953886	0.846538	0.979719	0.9116	0.955753	0.92257	0.834824	0.711552	0.827776	0.838875	0.763752	0.862876
61	0.802267	0.867966	0.923694	0.828672	0.953931	0.846591	0.979738	0.915263	0.955778	0.929897	0.823737	0.711896	0.816642	0.838971	0.772021	0.930085
62	0.820643	0.87942	0.923745	0.828714	0.953977	0.846643	0.979756	0.921338	0.955803	0.937225	0.83135	0.712118	0.805508	0.839068	0.824306	0.997293
63	0.839018	0.872927	0.913985	0.828755	0.96137	0.846682	0.978904	0.927414	0.955826	0.940068	0.843639	0.712309	0.799163	0.849359	0.876591	0.993411
64	0.830862	0.861946	0.904225	0.828779	0.9706	0.846706	0.974573	0.923989	0.955838	0.92497	0.855927	0.712501	0.811977	0.869845	0.855879	0.971755
65	0.811335	0.850965	0.89435	0.828795	0.97983	0.84673	0.970241	0.911062	0.955849	0.909872	0.850458	0.761721	0.82479	0.890331	0.803883	0.9501
66	0.791808	0.849869	0.88344	0.82881	0.973003	0.846744	0.969161	0.898135	0.955856	0.900812	0.837378	0.816388	0.832477	0.898526	0.751888	0.948873
67	0.8041	0.849872	0.87253	0.828813	0.964391	0.846743	0.972958	0.900723	0.955855	0.900812	0.824298	0.871055	0.832475	0.898528	0.741471	0.961264
68	0.824348	0.849875	0.867068	0.828806	0.95578	0.846742	0.976754	0.913655	0.955855	0.900811	0.821669	0.788525	0.832472	0.89853	0.741449	0.973656
69	0.844596	0.849857	0.867055	0.828799	0.954044	0.852311	0.97979	0.926588	0.955849	0.900803	0.821653	0.671695	0.82971	0.865795	0.752197	0.909122
70	0.80092	0.849839	0.867042	0.828779	0.954027	0.86345	0.979781	0.9214	0.955838	0.900788	0.821638	0.554865	0.815912	0.824876	0.806021	0.825356
71	0.757245	0.84541	0.882297	0.828752	0.95401	0.874589	0.979771	0.908447	0.955827	0.900773	0.8216	0.597442	0.802113	0.783958	0.859845	0.74159
72	0.738833	0.834366	0.904097	0.828726	0.945692	0.872322	0.979759	0.895494	0.950721	0.905128	0.821559	0.65773	0.811382	0.816591	0.892059	0.733175
73	0.758315	0.823321	0.922734	0.828686	0.936451	0.861117	0.979743	0.898241	0.945049	0.912396	0.821518	0.711963	0.83603	0.857398	0.891857	0.733131
74	0.777796	0.817772	0.912902	0.828642	0.927211	0.849913	0.979726	0.904913	0.939377	0.919664	0.810987	0.711687	0.860678	0.898204	0.891656	0.733088
75	0.787484	0.817719	0.903071	0.828599	0.93637	0.84651	0.979707	0.911585	0.939348	0.921817	0.797833	0.711411	0.858386	0.898097	0.891405	0.766599
76	0.787377	0.817663	0.89283	0.817484	0.945529	0.846451	0.979684	0.911548	0.939319	0.921778	0.784679	0.711136	0.844548	0.89799	0.891133	0.800111
77	0.78727	0.817597	0.880946	0.806369	0.952845	0.845145	0.979661	0.911511	0.939287	0.921739	0.78329	0.652178	0.830709	0.895837	0.890837	0.833622
78	0.774058	0.81753	0.869063	0.798567	0.943577	0.832622	0.979634	0.909308	0.939251	0.928744	0.783208	0.586701	0.816856	0.875261	0.890504	0.836901
79	0.75211	0.817456	0.875363	0.798496	0.934309	0.820099	0.979606	0.902049	0.939214	0.936532	0.783126	0.540738	0.803003	0.854685	0.890172	0.83682
80	0.730162	0.817376	0.886208	0.798424	0.928934	0.807569	0.979577	0.894789	0.93371	0.940911	0.783028	0.540309	0.802915	0.838193	0.824121	0.83674
81	0.730008	0.817296	0.892503	0.806383	0.939131	0.795033	0.979545	0.897625	0.926839	0.931655	0.782931	0.53988	0.816592	0.838035	0.758069	0.823302
82	0.729853	0.806156	0.880599	0.817782	0.949329	0.782497	0.979512	0.904788	0.922697	0.922399	0.782827	0.451622	0.830269	0.837876	0.73795	0.809864
83	0.729692	0.793786	0.868694	0.828032	0.95336	0.793296	0.974919	0.911229	0.922649	0.913483	0.782716	0.325723	0.806751	0.837702	0.737515	0.784412
84	0.729519	0.78878	0.866242	0.82794	0.953279	0.806687	0.96982	0.911171	0.922602	0.904604	0.782605	0.199824	0.779099	0.837525	0.737067	0.74094
85	0.729347	0.800957	0.866154	0.827848	0.949859	0.81333	0.96725	0.911113	0.922549	0.90013	0.782485	0.272891	0.759708	0.850227	0.736586	0.697467
86	0.72916	0.813134	0.863699	0.815313	0.938646	0.813225	0.967211	0.899635	0.922497	0.900061	0.782362	0.345959	0.759591	0.875806	0.736106	0.777414
87	0.728973	0.826021	0.851778	0.790335	0.927434	0.815815	0.967171	0.883261	0.928114	0.899992	0.782236	0.416851	0.759473	0.891837	0.735596	0.857361
88	0.750044	0.839212	0.839857	0.770141	0.93547	0.82919	0.967128	0.870631	0.934361	0.891983	0.782104	0.48681	0.759348	0.869675	0.735074	0.90014
89	0.773478	0.841044	0.83739	0.792997	0.945645	0.842564	0.967085	0.863616	0.936579	0.883093	0.781972	0.51606	0.759221	0.847513	0.734549	0.887166
90	0.772758	0.81637	0.837287	0.815853	0.9494	0.823563	0.967042	0.856602	0.929393	0.882677	0.781831	0.450321	0.759092	0.836321	0.733992	0.874192
91	0.747886	0.791696	0.839548	0.821695	0.938175	0.796468	0.966996	0.865865	0.922207	0.890735	0.781691	0.384583	0.758957	0.836099	0.733436	0.860867
92	0.723742	0.793519	0.851264	0.810525	0.926949	0.78579	0.96695	0.882105	0.922144	0.898794	0.774945	0.364402	0.758823	0.835877	0.688809	0.847391
93	0.702513	0.806696	0.862979	0.799354	0.934975	0.799738	0.966903	0.886261	0.922081	0.892201	0.758292	0.363745	0.768025	0.835645	0.625295	0.837918
94	0.681283	0.811718	0.865232	0.797024	0.945139	0.810929	0.966855	0.872292	0.922017	0.88398	0.744694	0.356815	0.783453	0.835412	0.580653	0.864467
95	0.695214	0.79771	0.865118	0.796905	0.949255	0.797311	0.965456	0.858323	0.921951	0.878199	0.758601	0.293425	0.794208	0.835176	0.580045	0.891016
96	0.744304	0.783702	0.859091	0.796784	0.939256	0.783692	0.960906	0.859129	0.921885	0.878113	0.772508	0.230035	0.794061	0.834933	0.579437	0.892256
97	0.778802	0.783569	0.847149	0.796661	0.929258	0.779512	0.956356	0.866266	0.921816	0.878026	0.769107	0.217764	0.793914	0.83469	0.690682	0.868185
98	0.754931	0.783436	0.836389	0.796537	0.931352	0.779377	0.957309	0.87196	0.921748	0.877938	0.739745	0.28217	0.775083	0.834443	0.801927	0.844115
99	0.73106	0.783302	0.836269	0.787225	0.941509	0.779242	0.961931	0.864666	0.92168	0.877848	0.710383	0.346577	0.743795	0.834193	0.841848	0.880656
100	0.726091	0.783166	0.836148	0.775616	0.951665	0.779103	0.966554	0.857371	0.921609	0.877759	0.717035	0.358877	0.729804	0.833941	0.715344	0.957605
101	0.725847	0.783029	0.836027	0.764007	0.95155	0.778964	0.961827	0.85021	0.921539	0.86953	0.73269	0.35815	0.756174	0.833685	0.58884	1.03455
102	0.725603	0.782891	0.835904	0.752395	0.951435	0.784219	0.957101	0.843181	0.921468	0.861301	0.742017	0.35742	0.782543	0.83343	0.693796	0.958047
103	0.725355	0.782752	0.83578	0.740784	0.947363	0.797566	0.954244	0.836153	0.921397	0.856326	0.741851	0.356679	0.784734	0.819492	0.82447	0.86449
104	0.725107	0.786296	0.835656	0.742694	0.937357	0.810912	0.954191	0.834681	0.921325	0.856233	0.741686	0.355939	0.770804	0.796433	0.838582	0.786945
105	0.708051	0.798433	0.835531	0.753619	0.92735	0.798319	0.954137	0.834598	0.921253	0.85614	0.752767	0.319923	0.756875	0.773374	0.774988	0.746761
106	0.686793	0.81057	0.829493	0.764544	0.924266	0.785726	0.950539	0.834515	0.92118	0.867439	0.766659	0.248631	0.756716	0.795066	0.723978	0.706577
107	0.665454	0.814112	0.817543	0.765517	0.924147	0.778112	0.945422	0.834432	0.918586	0.883621	0.777686	0.191755	0.756558	0.816758	0.723307	0.730392
108	0.643386	0.81397	0.807826	0.765384	0.924029	0.777968	0.940422	0.834349	0.91221	0.896412	0.762915	0.26461	0.756399	0.831862	0.722636	0.781636
109	0.621318	0.805847	0.81821	0.758762	0.92391	0.777824	0.935694	0.834265	0.905834	0.878686	0.748145	0.337466	0.756239	0.831598	0.721963	0.832879
110	0.621974	0.779102	0.828594	0.745649	0.923791	0.76689	0.930966	0.834182	0.909963	0.86096	0.740675	0.30127	0.75608	0.831334	0.72129	0.806037
111	0.645355	0.752357	0.834774	0.737344	0.93086	0.753258	0.933054	0.834098	0.916719	0.849879	0.740506	0.237811	0.769182	0.83107	0.720617	0.779195
112	0.666372	0.749555	0.834648	0.748268	0.941011	0.749817	0.938063	0.834014	0.918011	0.841647	0.740337	0.180622	0.782284	0.830806	0.719944	0.763028
113	0.666119	0.749413	0.834521	0.759191	0.948156	0.761662	0.940151	0.833931	0.91111	0.835013	0.740168	0.179869	0.777981	0.828346	0.67612	0.762874
114	0.665867	0.75541	0.834395	0.764587	0.92826	0.773507	0.935423	0.833847	0.904208	0.842755	0.739999	0.179116	0.733062	0.806129	0.60353	0.762719
115	0.653799	0.767547	0.834269	0.764454	0.908363	0.767519	0.930695	0.833764	0.904136	0.850498	0.7328	0.223948	0.688144	0.783912	0.527156	0.775415
116	0.629916	0.779683	0.829414	0.762901	0.904594	0.753888	0.922151	0.833681	0.904063	0.855106	0.718572	0.288316	0.68351	0.780356	0.446999	0.788112
117	0.608395	0.780771	0.817465	0.748554	0.925015	0.744304	0.911971	0.82927	0.9021	0.855013	0.704344	0.339903	0.683352	0.804794	0.500841	0.788947
118	0.608148	0.780631	0.805515	0.734207	0.945437	0.744162	0.906179	0.814759	0.895725	0.85492	0.701366	0.276459	0.690979	0.829232	0.644017	0.762108
119	0.6079	0.780491	0.805392	0.734077	0.941517	0.744021	0.910627	0.800248	0.88935	0.854828	0.7012	0.213015	0.706392	0.828975	0.683813	0.735269
120	0.607653	0.780353	0.805269	0.733948	0.931512	0.75587	0.915075	0.805564	0.883139	0.854736	0.695194	0.200703	0.718691	0.828717	0.620229	0.745101
121	0.607409	0.780215	0.805146	0.740708	0.922496	0.767719	0.911214	0.819378	0.876998	0.854644	0.680429	0.26509	0.718537	0.828461	0.57013	0.770651
122	0.607165	0.772984	0.805025	0.752062	0.922383	0.771926	0.901814	0.833192	0.870858	0.854554	0.665664	0.329477	0.718383	0.828208	0.641404	0.7962
123	0.606924	0.761025	0.804903	0.763416	0.922269	0.758301	0.892415	0.825898	0.870788	0.854464	0.673832	0.291619	0.71823	0.827954	0.712677	0.756022
124	0.606685	0.749066	0.816608	0.752234	0.920178	0.744676	0.897427	0.818604	0.870719	0.851119	0.687732	0.228199	0.718079	0.843663	0.712042	0.715844
125	0.606445	0.747751	0.828314	0.741052	0.910177	0.743192	0.902439	0.814196	0.87065	0.842893	0.698766	0.16454	0.717928	0.866214	0.711407	0.697462
126	0.606211	0.747618	0.825831	0.736633	0.900177	0.743057	0.896313	0.814119	0.870582	0.834667	0.684008	0.0987238	0.71778	0.884289	0.673022	0.711774
127	0.605976	0.747486	0.813889	0.747992	0.899726	0.742923	0.882761	0.814041	0.870514	0.8259	0.669249	0.0329079	0.717632	0.862092	0.609471	0.726086
128	0.605745	0.747356	0.804314	0.759351	0.908824	0.742792	0.869209	0.819015	0.864378	0.816997	0.661794	0.0623632	0.710026	0.839895	0.545922	0.751644
129	0.605516	0.747226	0.8042	0.762675	0.917923	0.74266	0.86781	0.826153	0.858241	0.814757	0.661641	0.18709	0.694962	0.826483	0.482386	0.777203
130	0.605288	0.747099	0.804086	0.762556	0.915565	0.731741	0.867761	0.831946	0.855817	0.822509	0.661488	0.311816	0.68139	0.826246	0.418849	0.769032
131	0.586158	0.746972	0.803973	0.762437	0.905571	0.719624	0.867713	0.82562	0.862056	0.830261	0.661338	0.336231	0.681249	0.82601	0.450418	0.682161
132	0.562302	0.746847	0.803862	0.762321	0.895577	0.709906	0.867665	0.819293	0.868295	0.832529	0.66119	0.335569	0.681108	0.825779	0.505764	0.59529
133	0.547902	0.746724	0.803752	0.762205	0.902772	0.709781	0.867618	0.813593	0.870123	0.832447	0.661042	0.334908	0.686274	0.82555	0.555518	0.618785
134	0.547687	0.746601	0.803644	0.768725	0.911876	0.709657	0.867572	0.813522	0.870061	0.834807	0.660898	0.334266	0.6994	0.827517	0.554946	0.654542
135	0.547471	0.746482	0.803536	0.779669	0.920981	0.709535	0.867526	0.813451	0.869998	0.842866	0.660754	0.333624	0.712526	0.84925	0.554373	0.6903
136	0.562531	0.746363	0.797518	0.790613	0.930772	0.709414	0.86658	0.813381	0.857798	0.850924	0.660612	0.332994	0.705928	0.870982	0.581779	0.690172
137	0.584138	0.746244	0.78559	0.780415	0.940562	0.709294	0.862035	0.813312	0.845597	0.848351	0.660473	0.332375	0.690876	0.883936	0.637163	0.690044
138	0.603564	0.746129	0.776736	0.767868	0.944307	0.709178	0.85749	0.813243	0.83704	0.841222	0.660334	0.331757	0.684434	0.883723	0.692547	0.689917
139	0.603364	0.746015	0.795555	0.761542	0.933942	0.709062	0.855196	0.813177	0.836981	0.834093	0.6602	0.298593	0.698079	0.88351	0.661535	0.689794
140	0.603164	0.745902	0.814374	0.761437	0.923578	0.711345	0.855154	0.813111	0.836923	0.831903	0.660065	0.232882	0.711724	0.8833	0.608925	0.689671
141	0.600783	0.745792	0.830323	0.761332	0.920405	0.723222	0.855111	0.813045	0.836867	0.83183	0.654309	0.167172	0.706448	0.883095	0.556314	0.697647
142	0.578776	0.745682	0.820441	0.771182	0.920314	0.7351	0.851019	0.812981	0.836811	0.831756	0.640119	0.216522	0.693064	0.885086	0.550596	0.709093
143	0.556768	0.745575	0.81056	0.782138	0.920223	0.734761	0.846478	0.812918	0.836755	0.831686	0.62593	0.278656	0.67968	0.906843	0.550089	0.720539
144	0.545673	0.74547	0.800534	0.790884	0.910247	0.722204	0.84116	0.812856	0.836701	0.831616	0.63075	0.328253	0.692825	0.928601	0.549581	0.686532
145	0.545489	0.745365	0.789932	0.790787	0.900271	0.709647	0.832741	0.812795	0.836648	0.831546	0.643718	0.327707	0.70597	0.932798	0.502224	0.633044
146	0.545306	0.745263	0.77933	0.790691	0.896229	0.69751	0.824321	0.812735	0.836595	0.83148	0.656686	0.32716	0.71116	0.910655	0.449662	0.599029
147	0.545129	0.745163	0.783771	0.781753	0.906035	0.685419	0.818416	0.816149	0.836544	0.831413	0.659186	0.416928	0.697786	0.888512	0.397099	0.740266
148	0.544955	0.745064	0.803256	0.770604	0.915841	0.678124	0.818379	0.823039	0.836493	0.831346	0.659069	0.529274	0.684412	0.897112	0.446984	0.881503
149	0.54478	0.738362	0.82274	0.762773	0.919716	0.690016	0.818342	0.829929	0.836443	0.837234	0.660261	0.64162	0.687262	0.918887	0.496869	0.955924
150	0.544613	0.72726	0.824809	0.784798	0.919637	0.701908	0.818305	0.820914	0.836395	0.843783	0.673241	0.663693	0.700928	0.940662	0.546754	0.930123
151	0.544447	0.716157	0.815267	0.806823	0.919558	0.707808	0.81827	0.807923	0.836346	0.850332	0.68622	0.663198	0.714594	0.940492	0.442161	0.904321
152	0.544282	0.72047	0.805725	0.824123	0.919482	0.707716	0.818235	0.794932	0.8363	0.842041	0.691521	0.651422	0.702557	0.940321	0.337569	0.879764
153	0.544124	0.731388	0.79599	0.834334	0.919407	0.707624	0.818201	0.793586	0.836254	0.82739	0.666107	0.594519	0.690521	0.942005	0.253464	0.85574
154	0.543968	0.742307	0.786127	0.844544	0.919332	0.700342	0.818168	0.793534	0.836208	0.812739	0.640693	0.537617	0.678484	0.960369	0.353742	0.831717
155	0.543813	0.734964	0.776263	0.844635	0.919261	0.688266	0.818135	0.793483	0.827423	0.822302	0.620341	0.492007	0.678389	0.978733	0.45402	0.799084
156	0.543666	0.723057	0.78153	0.834606	0.919191	0.67619	0.818102	0.799255	0.816454	0.837919	0.620242	0.491566	0.678294	0.997096	0.534792	0.764299
157	0.543519	0.712332	0.793281	0.824577	0.91912	0.684619	0.818071	0.805675	0.805485	0.851969	0.620144	0.491125	0.678201	0.998798	0.440015	0.729514
158	0.543372	0.712252	0.801486	0.824673	0.926173	0.695328	0.81804	0.812095	0.798889	0.851916	0.623843	0.509503	0.678111	0.998648	0.345239	0.759495
159	0.543233	0.712172	0.801416	0.834894	0.935008	0.706036	0.81576	0.812049	0.793385	0.851863	0.636405	0.571792	0.678021	0.998498	0.250462	0.805667
160	0.543095	0.712095	0.801347	0.845115	0.943842	0.707037	0.81123	0.812003	0.787882	0.848677	0.648967	0.634082	0.68629	1.01812	0.28314	0.85184
161	0.531225	0.71202	0.798343	0.849161	0.945559	0.706961	0.8067	0.811959	0.786751	0.840791	0.653807	0.692624	0.698142	1.03993	0.32998	0.880151
162	0.491978	0.711945	0.788493	0.849093	0.945497	0.706884	0.809012	0.811916	0.786713	0.832905	0.640629	0.748669	0.709993	1.06144	0.37682	0.903998
163	0.452731	0.711873	0.778642	0.849024	0.941164	0.693864	0.813035	0.811873	0.786675	0.835444	0.627451	0.804714	0.705138	1.08175	0.3554	0.927844
164	0.43821	0.711803	0.776491	0.848959	0.919745	0.680844	0.817059	0.811831	0.78664	0.84245	0.625136	0.791886	0.693124	1.10206	0.304724	0.849209
165	0.460776	0.711733	0.78589	0.848894	0.898327	0.679881	0.814491	0.811791	0.786604	0.849456	0.639116	0.733143	0.681109	1.11624	0.254049	0.759188
166	0.483342	0.711666	0.79529	0.84883	0.898785	0.690975	0.810275	0.811751	0.785544	0.851527	0.653095	0.6744	0.677454	1.11611	0.31154	0.698721
167	0.485496	0.711601	0.800906	0.84877	0.908619	0.70207	0.806059	0.814213	0.78039	0.851484	0.657236	0.728366	0.67738	1.11599	0.41539	0.756474
168	0.485382	0.711536	0.80085	0.84871	0.918453	0.70647	0.802302	0.820429	0.775235	0.851441	0.657159	0.830636	0.677307	1.12773	0.519239	0.814226
169	0.485269	0.706485	0.800794	0.84865	0.918402	0.706407	0.798596	0.826644	0.770081	0.8514	0.65146	0.932906	0.677237	1.14737	0.503166	0.853237
170	0.485162	0.696449	0.804287	0.85764	0.918351	0.706344	0.79489	0.828015	0.77005	0.85136	0.623267	0.972981	0.677169	1.16701	0.457112	0.817282
171	0.485056	0.686413	0.813103	0.866631	0.9183	0.699586	0.793394	0.822119	0.77002	0.85132	0.595074	0.919764	0.677101	1.17481	0.411059	0.781327
172	0.484951	0.682273	0.821919	0.875622	0.918252	0.688366	0.793372	0.816222	0.769989	0.851281	0.580944	0.866546	0.677036	1.1747	0.3879	0.745732
173	0.484852	0.691891	0.825415	0.871077	0.918205	0.677145	0.79335	0.811499	0.769961	0.851244	0.580877	0.845077	0.676973	1.17459	0.387636	0.710978
174	0.484753	0.701509	0.807631	0.860732	0.918158	0.673741	0.796165	0.811467	0.769932	0.851207	0.580811	0.950604	0.67691	1.20215	0.387372	0.676224
175	0.484657	0.711127	0.789846	0.850386	0.918114	0.673687	0.800195	0.811436	0.769904	0.849187	0.580747	1.05613	0.691173	1.24157	0.387114	0.651879
176	0.484565	0.7011	0.772061	0.864201	0.91807	0.673633	0.804225	0.811404	0.769877	0.842541	0.580686	1.16166	0.714987	1.28099	0.38687	0.651823
177	0.484473	0.691073	0.781476	0.884055	0.918026	0.673581	0.79975	0.817627	0.769851	0.835895	0.580624	1.2127	0.7388	1.29275	0.386625	0.651767
178	0.484384	0.681046	0.790891	0.903909	0.925995	0.673531	0.79163	0.82385	0.769279	0.830616	0.588418	1.26374	0.73397	1.29266	0.400546	0.654865
179	0.484299	0.679003	0.800307	0.907844	0.934855	0.673481	0.78351	0.830074	0.763791	0.837637	0.614543	1.31478	0.710044	1.29257	0.447518	0.686354
180	0.484214	0.678956	0.800266	0.9078	0.943714	0.668968	0.781062	0.830047	0.758304	0.844658	0.640669	1.32992	0.686119	1.30631	0.494489	0.717842
181	0.48413	0.678909	0.800225	0.907756	0.952576	0.65776	0.781044	0.83002	0.754356	0.850975	0.647886	1.32968	0.683232	1.32599	0.536742	0.74933
182	0.484053	0.685249	0.800183	0.900251	0.961439	0.646552	0.781027	0.829993	0.764267	0.850945	0.626743	1.32944	0.694372	1.34566	0.536534	0.774093
183	0.483975	0.695846	0.800145	0.890882	0.970301	0.646321	0.78101	0.833093	0.774177	0.850916	0.605599	1.3292	0.705512	1.36581	0.536326	0.797175
184	0.483897	0.706444	0.800107	0.881512	0.96287	0.657068	0.780994	0.839321	0.784087	0.850887	0.584456	1.32898	0.703497	1.38618	0.526679	0.820256
185	0.468176	0.704274	0.800069	0.877742	0.953628	0.667815	0.780978	0.845548	0.781955	0.85086	0.580189	1.32875	0.68175	1.40654	0.432092	0.801048
186	0.448545	0.693592	0.792466	0.877704	0.944386	0.673169	0.782988	0.845809	0.776813	0.850833	0.58014	1.33912	0.660002	1.44216	0.337505	0.771266
187	0.428915	0.682911	0.782971	0.877666	0.944353	0.673129	0.787023	0.840101	0.77167	0.850806	0.580092	1.39182	0.641659	1.48161	0.242919	0.741485
188	0.44236	0.685	0.773476	0.880615	0.944321	0.673089	0.791059	0.834394	0.769602	0.855012	0.580046	1.44452	0.653964	1.52105	0.233298	0.723878
189	0.459481	0.695604	0.779119	0.89053	0.944288	0.670817	0.79307	0.831118	0.769582	0.86204	0.580001	1.49721	0.666269	1.52889	0.233118	0.734679
190	0.476601	0.706207	0.788545	0.900446	0.944258	0.659618	0.793056	0.837564	0.769563	0.869067	0.579957	1.44572	0.673547	1.52882	0.232939	0.745481
191	0.472068	0.704441	0.797972	0.910465	0.944227	0.648419	0.793042	0.844011	0.769544	0.875832	0.575986	1.39422	0.660718	1.52875	0.278078	0.755198
192	0.453098	0.69443	0.799832	0.920727	0.944197	0.644037	0.793028	0.850393	0.769526	0.88242	0.562853	1.34273	0.647889	1.5603	0.328253	0.75516
193	0.434129	0.684419	0.799801	0.930988	0.952259	0.655563	0.793015	0.856626	0.769508	0.889009	0.54972	1.40616	0.644653	1.59975	0.378428	0.755122
194	0.426505	0.678399	0.79977	0.941396	0.960321	0.667089	0.793002	0.862858	0.766213	0.890132	0.546886	1.51884	0.655805	1.6392	0.383302	0.750458
195	0.426446	0.678365	0.799741	0.952027	0.968384	0.667254	0.791774	0.867215	0.760732	0.883057	0.559501	1.63153	0.666956	1.64705	0.383143	0.704164
196	0.426386	0.678332	0.799711	0.962657	0.964553	0.656058	0.787711	0.867196	0.755252	0.875982	0.572116	1.70472	0.678258	1.64698	0.382984	0.657869
197	0.426328	0.67443	0.799682	0.966891	0.955626	0.644863	0.783647	0.867176	0.756441	0.868594	0.575068	1.76098	0.690158	1.64692	0.337522	0.618514
198	0.426272	0.664724	0.799654	0.966861	0.946699	0.646839	0.781904	0.865452	0.762076	0.860737	0.563526	1.81724	0.702057	1.67848	0.287027	0.641608
199	0.426215	0.655019	0.799626	0.966831	0.944003	0.657597	0.785575	0.859749	0.767711	0.852879	0.551984	1.7945	0.70723	1.71794	0.236532	0.664703
200	0.438191	0.646281	0.799598	0.96047	0.943976	0.668355	0.789245	0.854047	0.76939	0.850508	0.541593	1.7379	0.685493	1.7574	0.231351	0.684434
201	0.455324	0.64625	0.79957	0.951395	0.94395	0.666166	0.792916	0.848344	0.769375	0.850487	0.541556	1.6813	0.663757	1.78105	0.231204	0.673887
202	0.472457	0.646219	0.799543	0.94232	0.952825	0.655345	0.784803	0.854188	0.769359	0.850467	0.54152	1.70125	0.642021	1.80075	0.231058	0.66334
203	0.46759	0.646189	0.799516	0.944824	0.9706	0.644524	0.77669	0.860032	0.767357	0.861026	0.541483	1.75399	0.659958	1.82045	0.266154	0.652794
204	0.429723	0.646159	0.799489	0.964698	0.988374	0.646651	0.768577	0.865876	0.762375	0.876119	0.541447	1.80674	0.682304	1.83917	0.316355	0.668005
205	0.391856	0.646129	0.799462	0.984571	0.988349	0.657411	0.768566	0.867031	0.757393	0.891212	0.541411	1.80738	0.70465	1.85764	0.366556	0.689656
206	0.376678	0.646098	0.799435	0.992866	0.970524	0.66817	0.768554	0.867013	0.752411	0.871545	0.541376	1.75592	0.71133	1.87611	0.381517	0.711307
207	0.395531	0.646068	0.801989	0.983791	0.952699	0.672456	0.768543	0.866996	0.747429	0.848016	0.550831	1.70446	0.711297	1.88346	0.381375	0.733825
208	0.414385	0.646039	0.810562	0.974717	0.951865	0.672426	0.772582	0.866978	0.742448	0.832323	0.562659	1.66325	0.711263	1.8834	0.381233	0.756922
209	0.4188	0.646009	0.819135	0.968357	0.968021	0.672395	0.776621	0.86696	0.737466	0.847976	0.574487	1.66309	0.706889	1.88335	0.381091	0.780018
210	0.401559	0.652363	0.827707	0.986421	0.984178	0.666479	0.780661	0.866943	0.736457	0.863629	0.579197	1.66293	0.696005	1.89407	0.380948	0.770313
211	0.384317	0.662974	0.818221	1.00449	0.99548	0.656639	0.780649	0.866925	0.736442	0.867214	0.579161	1.66277	0.68512	1.91198	0.380806	0.738741
212	0.368794	0.673585	0.808734	1.02255	0.987364	0.6468	0.780637	0.866907	0.736426	0.85873	0.579125	1.75784	0.674235	1.92988	0.360525	0.707168
213	0.36874	0.671426	0.799248	1.01818	0.979247	0.639902	0.780626	0.866889	0.73939	0.850247	0.579088	1.8635	0.66335	1.9424	0.310036	0.685057
214	0.368685	0.660754	0.79922	1.0082	0.971131	0.63987	0.777779	0.866871	0.744341	0.864331	0.579051	1.96915	0.652464	1.94234	0.259546	0.685023
215	0.370348	0.650081	0.799192	0.998219	0.978305	0.639839	0.773716	0.866852	0.749291	0.878416	0.579014	2.07255	0.641579	1.94228	0.229192	0.684989
216	0.387479	0.639409	0.799164	1.00366	0.987179	0.639807	0.769653	0.866834	0.749473	0.892501	0.57518	2.17499	0.648921	1.94223	0.229041	0.684955
217	0.40461	0.628735	0.799135	1.01296	0.996052	0.639774	0.771261	0.866815	0.738531	0.892479	0.562487	2.27742	0.660821	1.98168	0.22889	0.676825
218	0.42174	0.618062	0.799107	1.02226	0.996914	0.639741	0.7753	0.866796	0.727588	0.892458	0.549794	2.31829	0.672721	2.02114	0.248874	0.665225
219	0.397618	0.620613	0.799077	1.03174	0.996887	0.639708	0.779338	0.866776	0.721679	0.892436	0.540896	2.26681	0.684619	2.0606	0.299059	0.653625
220	0.363182	0.63198	0.799047	1.04134	0.996859	0.639673	0.783375	0.866757	0.727515	0.892413	0.540856	2.21533	0.696517	2.06053	0.349244	0.650118
221	0.328746	0.643347	0.799016	1.05093	0.986817	0.639638	0.787413	0.866736	0.733351	0.892391	0.540815	2.18027	0.708415	2.06047	0.379288	0.650081
222	0.330403	0.653331	0.798985	1.06038	0.9701	0.639604	0.79145	0.866715	0.739294	0.892368	0.540774	2.29294	0.701214	2.06041	0.379119	0.650043
223	0.368152	0.662969	0.798953	1.06968	0.953383	0.650357	0.792652	0.866695	0.745346	0.892344	0.553385	2.40562	0.689238	2.07417	0.378951	0.627926
224	0.405901	0.672606	0.798921	1.07897	0.946785	0.66111	0.792638	0.870425	0.751397	0.892319	0.565997	2.49492	0.677261	2.09386	0.393885	0.596346
225	0.415287	0.672085	0.798888	1.08258	0.955366	0.671863	0.792624	0.876655	0.747736	0.892295	0.578608	2.37379	0.674832	2.11355	0.544734	0.564767
226	0.396312	0.661406	0.798853	1.07291	0.963948	0.671823	0.803951	0.882886	0.741646	0.892269	0.555553	2.25266	0.674789	2.13324	0.695584	0.58178
227	0.377337	0.650726	0.798819	1.06324	0.972614	0.671783	0.820138	0.885363	0.736692	0.892243	0.532498	2.18473	0.674746	2.15292	0.831329	0.671684
228	0.367812	0.650202	0.798784	1.05772	0.98148	0.669345	0.836326	0.88534	0.741958	0.892217	0.509442	2.24095	0.6747	2.17261	0.831135	0.761587
229	0.367739	0.659834	0.798746	1.06873	0.990346	0.657314	0.851482	0.885316	0.747223	0.892189	0.511982	2.29717	0.674654	2.16364	0.830941	0.76424
230	0.367665	0.669466	0.798709	1.07975	0.998969	0.645283	0.866195	0.889043	0.752489	0.892161	0.52549	2.33645	0.674607	2.14239	0.830747	0.7295
231	0.382224	0.672433	0.798671	1.08026	1.00702	0.639244	0.880908	0.895269	0.757929	0.892133	0.538998	2.33622	0.674558	2.12114	0.88088	0.694761
232	0.400441	0.648741	0.798631	1.07027	1.01508	0.639199	0.898567	0.901496	0.763369	0.899156	0.5403	2.33598	0.674508	2.15128	0.931013	0.67647
233	0.418659	0.625049	0.79859	1.06028	1.02313	0.639153	0.920644	0.907601	0.768809	0.906962	0.540246	2.40127	0.674458	2.18712	0.981146	0.665228
234	0.410829	0.618327	0.79855	1.06592	1.03199	0.646658	0.94272	0.913624	0.756645	0.913201	0.540191	2.51025	0.666049	2.22296	1.11822	0.653986
235	0.391836	0.628576	0.798506	1.0872	1.04085	0.657399	0.967043	0.919647	0.74448	0.913168	0.540132	2.61923	0.654059	2.24909	1.25529	0.649457
236	0.372843	0.638825	0.798462	1.10847	1.04971	0.66814	1.01158	0.92577	0.739129	0.913135	0.540074	2.70179	0.642069	2.26876	1.39236	0.649403
237	0.36708	0.649683	0.800137	1.11482	1.04013	0.662933	1.05612	0.931992	0.749676	0.911737	0.540014	2.75795	0.646785	2.28842	1.57427	0.649348
238	0.366986	0.661453	0.808689	1.11477	1.03055	0.650891	1.09951	0.938214	0.760223	0.904877	0.539951	2.81411	0.658662	2.28545	1.77539	0.649291
239	0.366892	0.673224	0.817241	1.11472	1.02644	0.638848	1.13263	0.938467	0.767562	0.898016	0.539887	2.84205	0.670539	2.26739	1.97652	0.649232
240	0.366793	0.669266	0.825793	1.12214	1.04419	0.649233	1.16576	0.932749	0.76207	0.892543	0.53476	2.84175	0.665105	2.24932	2.03666	0.649173
241	0.366692	0.658568	0.826601	1.13274	1.06194	0.659617	1.19888	0.927032	0.756578	0.899557	0.522037	2.84146	0.652253	2.2485	2.03639	0.655419
242	0.36659	0.647869	0.826549	1.14335	1.07614	0.670001	1.23057	0.924952	0.753271	0.906571	0.509314	2.88483	0.6394	2.28791	2.03612	0.665868
243	0.351012	0.644616	0.826497	1.15332	1.07609	0.670984	1.26191	0.937421	0.758702	0.913585	0.506548	2.93912	0.648795	2.32732	2.17176	0.676317
244	0.333714	0.644554	0.831934	1.16321	1.07603	0.670921	1.29324	0.949891	0.764134	0.920596	0.51872	2.99342	0.660661	2.35486	2.3225	0.680456
245	0.316416	0.644492	0.841032	1.1731	1.08029	0.668769	1.31964	0.961068	0.768472	0.927606	0.530892	3.00946	0.672528	2.35474	2.47324	0.669872
246	0.309424	0.644426	0.850129	1.17404	1.08884	0.65826	1.34392	0.96708	0.768438	0.933912	0.531795	3.00911	0.673647	2.35462	2.61159	0.659288
247	0.309304	0.644358	0.849917	1.17397	1.0974	0.64775	1.3682	0.973092	0.768404	0.933866	0.506405	3.00876	0.673572	2.36768	2.74858	0.648705
248	0.309184	0.64429	0.840396	1.1728	1.10251	0.639363	1.3868	0.978498	0.768369	0.93382	0.481014	3.0479	0.672303	2.43341	2.88556	0.637436
249	0.31937	0.644221	0.830874	1.16168	1.10245	0.65008	1.40298	0.978455	0.768332	0.933775	0.467011	3.10396	0.660286	2.49914	2.99506	0.626168
250	0.336428	0.644146	0.82608	1.15056	1.10239	0.660797	1.41915	0.978413	0.768295	0.938704	0.479578	3.16001	0.648269	2.52135	3.08625	0.6149
251	0.353485	0.644072	0.826013	1.15238	1.10233	0.670434	1.43222	0.97837	0.768257	0.944877	0.492145	3.17654	0.637445	2.50004	3.17743	0.613698
252	0.365382	0.643998	0.825946	1.17363	1.10227	0.670355	1.44395	0.983327	0.776958	0.95105	0.500913	3.17613	0.637357	2.47873	3.25447	0.613615
253	0.36524	0.63362	0.832498	1.19488	1.1022	0.670275	1.45568	0.989533	0.787844	0.954733	0.500818	3.17572	0.637269	2.48607	3.29851	0.613532
254	0.365098	0.623242	0.841885	1.20334	1.10214	0.67124	1.46764	0.995739	0.798729	0.954679	0.500722	3.22609	0.638336	2.50568	3.34256	0.623515
255	0.361173	0.612863	0.851273	1.20326	1.10206	0.681596	1.47976	0.99694	0.796642	0.954624	0.500627	3.39495	0.649792	2.52528	3.3866	0.634616
256	0.342113	0.611747	0.854035	1.20318	1.10199	0.691952	1.49188	0.99689	0.791312	0.951839	0.500524	3.56381	0.661248	2.53105	3.39063	0.645718
257	0.323053	0.61166	0.853957	1.2031	1.10192	0.702309	1.49436	0.99684	0.785981	0.944955	0.500421	3.66647	0.672704	2.53089	3.39022	0.675615
258	0.307772	0.611574	0.853879	1.20302	1.10185	0.702216	1.4904	1.00349	0.795821	0.938071	0.500318	3.61468	0.660666	2.53073	3.3898	0.710212
259	0.307606	0.611481	0.853798	1.20293	1.10177	0.702123	1.48645	1.01683	0.812163	0.933234	0.477429	3.5629	0.648628	2.54241	3.44978	0.744808
260	0.307441	0.611387	0.853715	1.20782	1.10169	0.702031	1.48446	1.03018	0.828505	0.933171	0.452008	3.51111	0.63659	2.58176	3.55003	0.734823
261	0.307275	0.611294	0.853631	1.21768	1.10829	0.701933	1.48442	1.0299	0.833372	0.933109	0.426588	3.56039	0.636481	2.6211	3.65027	0.713692
262	0.322112	0.611194	0.861781	1.22754	1.11774	0.701833	1.48438	1.02379	0.833321	0.937139	0.444037	3.60966	0.636371	2.65432	3.69008	0.692561
263	0.338615	0.611093	0.870847	1.23242	1.1272	0.701732	1.4863	1.01769	0.833271	0.943897	0.466248	3.65894	0.636261	2.67325	3.6896	0.676343
264	0.355118	0.610993	0.879912	1.23233	1.12806	0.697452	1.49018	1.02203	0.833218	0.950655	0.48846	3.64445	0.625401	2.69218	3.68912	0.665039
265	0.35382	0.619125	0.874768	1.23223	1.12797	0.686902	1.49406	1.03333	0.833164	0.953998	0.505253	3.58745	0.613348	2.71088	3.66574	0.653734
266	0.334721	0.629315	0.866072	1.23611	1.12789	0.676353	1.49638	1.04464	0.83311	0.953926	0.516628	3.53046	0.601294	2.72864	3.61946	0.651109
267	0.315621	0.639505	0.857377	1.24596	1.13554	0.675198	1.49633	1.05052	0.827785	0.953854	0.528003	3.54358	0.620767	2.7464	3.57318	0.661501
268	0.315117	0.642481	0.857555	1.2558	1.14406	0.695967	1.49629	1.04376	0.821874	0.957193	0.534626	3.60345	0.643742	2.76416	3.53604	0.671893
269	0.333208	0.642365	0.866606	1.26167	1.15258	0.716735	1.49311	1.03699	0.817134	0.963941	0.522241	3.66331	0.666718	2.73132	3.53549	0.685709
270	0.351299	0.64225	0.875658	1.26156	1.15421	0.72853	1.48523	1.0367	0.822926	0.970689	0.509856	3.71847	0.652724	2.69286	3.53494	0.730346
271	0.369384	0.638012	0.881045	1.26145	1.15411	0.704429	1.47734	1.04288	0.828718	0.972141	0.497339	3.77245	0.629488	2.6544	3.53896	0.774982
272	0.387462	0.62759	0.880935	1.26133	1.15401	0.680329	1.47181	1.04906	0.835925	0.965647	0.483633	3.82642	0.606251	2.69394	3.58414	0.819618
273	0.405539	0.617169	0.880826	1.26122	1.1539	0.668213	1.47176	1.05211	0.846433	0.959154	0.469927	3.88164	0.606775	2.75299	3.62931	0.78794
274	0.412451	0.609835	0.886794	1.2611	1.15379	0.668083	1.47171	1.05204	0.856942	0.953301	0.460286	3.9374	0.617482	2.81203	3.67449	0.756262
275	0.393311	0.609703	0.896813	1.26098	1.15369	0.667953	1.47247	1.05196	0.862994	0.953213	0.46013	3.99316	0.628189	2.82364	3.71856	0.724584
276	0.374171	0.609572	0.906832	1.28011	1.15358	0.667819	1.47647	1.05189	0.851219	0.953126	0.459974	3.97452	0.639173	2.8234	3.76235	0.699309
277	0.360698	0.609438	0.908738	1.29924	1.15346	0.66768	1.48047	1.05181	0.839444	0.953038	0.473212	3.92401	0.65057	2.82315	3.80614	0.676779
278	0.36045	0.609299	0.908616	1.31838	1.15335	0.667542	1.48192	1.05173	0.837206	0.959771	0.495379	3.87349	0.661968	2.82289	3.81384	0.654248
279	0.360202	0.60916	0.908494	1.3115	1.15895	0.667403	1.47319	1.05164	0.849273	0.966503	0.517545	3.85604	0.669898	2.82263	3.7674	0.645142
280	0.359953	0.609019	0.908365	1.30174	1.16837	0.667256	1.46446	1.05851	0.86134	0.973235	0.530345	3.91574	0.669736	2.82237	3.72096	0.644986
281	0.359692	0.608871	0.908235	1.29198	1.17778	0.667108	1.46076	1.06537	0.864907	0.97382	0.505676	3.97544	0.669574	2.83548	3.68798	0.644829
282	0.359429	0.608723	0.908106	1.29715	1.17957	0.666961	1.46462	1.06613	0.864831	0.973722	0.481008	4.00489	0.661736	2.85433	3.77611	0.640953
283	0.361056	0.608575	0.899623	1.30605	1.17944	0.677248	1.46849	1.05264	0.864754	0.973624	0.457523	4.00408	0.635989	2.87317	3.86424	0.628397
284	0.379686	0.617688	0.89114	1.31496	1.17931	0.687534	1.4701	1.03915	0.864675	0.97352	0.444683	4.00327	0.610241	2.89201	3.95236	0.615841
285	0.398316	0.627829	0.882656	1.32415	1.18541	0.697821	1.46647	1.03597	0.864595	0.973417	0.431843	4.02664	0.603053	2.91084	3.94624	0.609476
286	0.415054	0.637971	0.874016	1.33363	1.19418	0.698702	1.46283	1.04309	0.864514	0.973313	0.421385	4.14672	0.614425	2.92967	3.89971	0.609302
287	0.414763	0.632356	0.865272	1.34311	1.20295	0.698538	1.4592	1.05021	0.862021	0.979429	0.432355	4.2668	0.625796	2.93893	3.85319	0.609128
288	0.414472	0.622802	0.856528	1.34171	1.21151	0.698374	1.45878	1.05083	0.857116	0.991765	0.443326	4.31857	0.632543	2.93862	3.82496	0.608951
289	0.414181	0.613248	0.850361	1.32399	1.21998	0.690356	1.45871	1.05074	0.85221	1.0041	0.454297	4.26788	0.632355	2.93832	3.82416	0.608768
290	0.358986	0.611315	0.850208	1.30627	1.22845	0.680374	1.45865	1.05064	0.848879	1.01455	0.448871	4.21719	0.632166	2.95237	3.82336	0.608585
291	0.30379	0.620815	0.850056	1.28856	1.22704	0.670392	1.44893	1.05053	0.859716	1.00802	0.436419	4.1665	0.628509	2.98797	3.82256	0.615114
292	0.248594	0.630315	0.849903	1.31553	1.21904	0.665311	1.43815	1.05043	0.870552	1.0015	0.423967	4.22017	0.61676	3.02358	3.91326	0.637305
293	0.272813	0.637816	0.849743	1.3425	1.21104	0.66513	1.42736	1.05093	0.87871	0.994969	0.432662	4.27385	0.605011	3.05559	4.00395	0.659496
294	0.305857	0.627336	0.849583	1.36947	1.20289	0.664948	1.42193	1.05688	0.862756	0.993566	0.455455	4.32752	0.597881	3.05525	4.09464	0.672732
295	0.3389	0.616856	0.849422	1.3713	1.19412	0.664764	1.42186	1.06282	0.846802	0.993445	0.478248	4.332	0.609224	3.05491	4.05904	0.650148
296	0.355254	0.606376	0.853987	1.36234	1.18535	0.664574	1.42179	1.06877	0.830848	0.993323	0.490461	4.33102	0.620568	3.05457	3.96932	0.627565
297	0.354918	0.606184	0.863279	1.35339	1.17906	0.664385	1.42091	1.06865	0.84661	0.997554	0.477989	4.33003	0.63184	3.05422	3.87959	0.608269
298	0.354581	0.605993	0.87257	1.34707	1.19508	0.664192	1.41273	1.06854	0.862372	1.00365	0.465516	4.37816	0.642474	3.05386	3.84316	0.618572
299	0.363386	0.605802	0.877128	1.34688	1.2111	0.663994	1.40456	1.06843	0.878135	1.00975	0.457941	4.43175	0.653108	3.0535	3.93108	0.628876
300	0.381332	0.605606	0.876952	1.3467	1.22712	0.663796	1.39641	1.06831	0.879619	1.01397	0.469951	4.48534	0.663742	3.04167	4.01899	0.639179
301	0.399279	0.605406	0.876776	1.34652	1.23019	0.663597	1.38849	1.0682	0.879517	1.01384	0.481962	4.45536	0.665688	3.02217	4.10691	0.624737
302	0.403227	0.605207	0.8766	1.35447	1.23002	0.672219	1.38057	1.06808	0.879414	1.01371	0.490298	4.40449	0.665461	3.00268	4.03245	0.604109
303	0.38618	0.609698	0.876417	1.36332	1.22985	0.681821	1.37266	1.06796	0.881953	1.01221	0.46556	4.35363	0.665235	2.99274	3.93995	0.583482
304	0.369132	0.618879	0.876234	1.37218	1.22968	0.691423	1.36474	1.06784	0.887133	1.00524	0.440823	4.34451	0.648831	2.99236	3.84745	0.566932
305	0.352084	0.62806	0.87605	1.3756	1.22951	0.682605	1.35682	1.06771	0.892314	0.998281	0.416085	4.398	0.625495	2.99197	3.80985	0.556499
306	0.351703	0.635271	0.866706	1.3754	1.22933	0.661505	1.3489	1.06759	0.891521	0.992641	0.438162	4.4515	0.602158	3.00553	3.80884	0.546066
307	0.351322	0.624758	0.857361	1.3752	1.23174	0.640406	1.34482	1.06746	0.88177	0.998909	0.460238	4.4886	0.599607	3.04	3.80784	0.535633
308	0.350942	0.614244	0.848016	1.375	1.24017	0.634966	1.34116	1.06734	0.872019	1.00518	0.482315	4.48744	0.610914	3.07446	3.80682	0.591352
309	0.36153	0.60373	0.863383	1.3748	1.2486	0.645184	1.3375	1.06721	0.862267	1.01145	0.490987	4.48628	0.622221	3.10893	3.80577	0.647072
310	0.379432	0.594638	0.881495	1.37459	1.2553	0.655403	1.33171	1.06103	0.862152	1.01258	0.490723	4.48513	0.622482	3.10852	3.80473	0.702792
311	0.397334	0.585546	0.899607	1.37535	1.25512	0.661442	1.32379	1.05485	0.862037	1.01243	0.490459	4.52874	0.611698	3.1081	3.80368	0.687997
312	0.414421	0.576454	0.91039	1.38476	1.25493	0.661211	1.31586	1.04866	0.861923	1.01228	0.484607	4.57733	0.600914	3.10769	3.8026	0.665368
313	0.430695	0.570906	0.91934	1.39418	1.25388	0.66098	1.30821	1.05337	0.857335	1.01213	0.473167	4.62593	0.590026	3.12342	3.80152	0.642739
314	0.446968	0.570674	0.928291	1.40359	1.24507	0.660747	1.30097	1.05928	0.852249	1.01198	0.461728	4.6496	0.578214	3.14096	3.80043	0.629057
315	0.461572	0.570441	0.93083	1.413	1.23626	0.660509	1.29374	1.0652	0.847164	1.01182	0.451404	4.64836	0.566402	3.15849	3.8171	0.617612
316	0.46115	0.570207	0.93062	1.42241	1.22745	0.660271	1.2865	1.06627	0.845057	1.01167	0.451121	4.64712	0.55459	3.16524	3.8604	0.606166
317	0.460728	0.569967	0.93041	1.43182	1.22725	0.655985	1.27569	1.06613	0.844934	1.01151	0.450839	4.6677	0.575384	3.16479	3.9037	0.595406
318	0.460306	0.569727	0.930196	1.4233	1.22705	0.635509	1.26487	1.06599	0.844812	1.01135	0.450556	4.72104	0.596177	3.16435	3.947	0.58494
319	0.496465	0.569488	0.92998	1.41278	1.22685	0.615032	1.25406	1.06585	0.847248	1.01119	0.450265	4.77437	0.616971	3.1639	3.89712	0.574475
320	0.532625	0.579503	0.929764	1.40225	1.23371	0.594556	1.24753	1.0657	0.852244	1.01717	0.449975	4.82769	0.618803	3.16345	3.84725	0.570129
321	0.568784	0.590658	0.934122	1.40202	1.24136	0.604746	1.24387	1.06556	0.857239	1.02383	0.449684	4.88099	0.607994	3.16299	3.79737	0.580063
322	0.588466	0.600672	0.943055	1.40179	1.249	0.614936	1.2402	1.06904	0.859111	1.03049	0.44204	4.93429	0.597184	3.16428	3.79131	0.589997
323	0.606317	0.600419	0.951987	1.40156	1.25272	0.625126	1.23489	1.07495	0.853695	1.02077	0.429495	4.97666	0.58848	3.18124	3.79013	0.599931
324	0.624168	0.600167	0.960595	1.40132	1.25251	0.634481	1.22303	1.08085	0.848279	1.00695	0.416949	4.97531	0.588195	3.19821	3.78894	0.600675
325	0.627373	0.599914	0.968714	1.40108	1.2523	0.643743	1.21118	1.0807	0.84392	0.993136	0.416647	4.97396	0.58791	3.21517	3.78773	0.600398
326	0.626917	0.590389	0.976833	1.40084	1.25553	0.653005	1.2005	1.0745	0.843787	0.998128	0.428587	4.97261	0.586469	3.21992	3.78652	0.60012
327	0.626461	0.579832	0.984952	1.4006	1.26392	0.657503	1.2004	1.0683	0.843655	1.01118	0.440527	4.97124	0.574626	3.21944	3.7853	0.60208
328	0.66442	0.569276	0.984719	1.40036	1.27232	0.657239	1.2003	1.06451	0.843522	1.02423	0.447566	4.96986	0.562784	3.21896	3.75297	0.612987
329	0.718844	0.566953	0.984486	1.40011	1.27813	0.656974	1.2002	1.06436	0.843387	1.02726	0.447254	4.96848	0.550941	3.20318	3.70731	0.623894
330	0.773268	0.566689	0.984253	1.40372	1.27791	0.647458	1.18223	1.0642	0.843252	1.02026	0.446941	5.0763	0.562195	3.18357	3.66165	0.634702
331	0.818222	0.566425	0.99998	1.4131	1.27769	0.624067	1.16426	1.06405	0.844562	1.01326	0.442699	5.18412	0.573448	3.16395	3.64263	0.644616
332	0.856864	0.566158	1.02635	1.42248	1.27747	0.600676	1.14629	1.06389	0.849244	1.00898	0.429289	5.29194	0.584701	3.17111	3.68578	0.654529
333	0.895506	0.565888	1.05271	1.43217	1.27724	0.59742	1.13903	1.06373	0.853927	1.00881	0.41588	5.39666	0.595624	3.18973	3.72893	0.664443
334	0.949683	0.565619	1.06478	1.44258	1.27701	0.607587	1.13893	1.06358	0.858609	1.00863	0.407704	5.50104	0.606511	3.20835	3.77208	0.645782
335	1.01052	0.568438	1.05538	1.45299	1.27679	0.617755	1.13883	1.06342	0.863561	1.00845	0.40738	5.60542	0.617397	3.22595	3.77523	0.614874
336	1.07135	0.578462	1.04598	1.4534	1.27656	0.617641	1.1338	1.06326	0.868542	1.00827	0.407056	5.66774	0.620448	3.24288	3.77394	0.583966
337	1.13219	0.588485	1.04684	1.44381	1.27633	0.607246	1.12384	1.06309	0.873523	1.00808	0.41008	5.71204	0.620139	3.25981	3.77264	0.56224
338	1.16506	0.594571	1.07164	1.43422	1.2761	0.596852	1.11388	1.05741	0.874918	1.0079	0.420917	5.75634	0.619831	3.26954	3.73052	0.561939
339	1.19793	0.584904	1.09643	1.43007	1.27587	0.589491	1.10392	1.05174	0.874775	1.00772	0.431754	5.80063	0.616056	3.2505	3.64757	0.561639
340	1.2308	0.575236	1.12123	1.43859	1.27564	0.589208	1.09352	1.04606	0.874633	1.00753	0.442591	5.84895	0.604192	3.23146	3.56462	0.561338
341	1.29884	0.565569	1.14172	1.44711	1.2754	0.588925	1.08299	1.04731	0.870152	1.00735	0.424905	5.89726	0.592328	3.21242	3.48166	0.5794
342	1.39032	0.55543	1.16175	1.45563	1.27517	0.590545	1.07247	1.0532	0.855546	1.00716	0.40405	5.94557	0.580838	3.2119	3.49666	0.599503
343	1.4818	0.545172	1.18217	1.45624	1.28907	0.59978	1.06154	1.05909	0.840941	1.00698	0.383195	6.02953	0.570844	3.21137	3.53615	0.619606
344	1.57327	0.534914	1.20624	1.45598	1.30454	0.609014	1.04968	1.06195	0.826336	1.00679	0.368677	6.13726	0.560849	3.21085	3.57563	0.618662
345	1.68707	0.536819	1.23032	1.45657	1.32001	0.618249	1.03781	1.06178	0.834261	1.00456	0.379505	6.24499	0.550855	3.22078	3.60309	0.59667
346	1.80334	0.546833	1.25439	1.46483	1.32345	0.619864	1.02615	1.06161	0.844688	0.997541	0.390333	6.37279	0.550963	3.23769	3.52225	0.574679
347	1.91961	0.556846	1.28034	1.47309	1.31487	0.619575	1.01532	1.06145	0.855116	0.990528	0.401161	6.52066	0.561175	3.2546	3.44141	0.559191
348	2.05068	0.556561	1.30755	1.48136	1.30629	0.619286	1.00449	1.06128	0.852987	0.986244	0.403055	6.66853	0.571387	3.27184	3.36057	0.55888
349	2.19654	0.545977	1.33476	1.49606	1.30021	0.618997	0.993656	1.06111	0.847718	0.992879	0.402714	6.81114	0.580545	3.29043	3.34356	0.55857
350	2.34241	0.535393	1.3574	1.51505	1.29997	0.618706	0.977994	1.06094	0.84245	0.999514	0.402374	6.90636	0.580223	3.30902	3.47546	0.558259
351	2.50103	0.532918	1.37545	1.53404	1.29973	0.618415	0.961123	1.06408	0.837082	1.00401	0.408732	7.00158	0.579901	3.32199	3.60737	0.585497
352	2.67878	0.542606	1.3935	1.54779	1.29949	0.618124	0.944253	1.06943	0.831647	0.989225	0.419556	7.0968	0.57958	3.28441	3.73927	0.615797
353	2.85653	0.552295	1.41487	1.5563	1.30783	0.600695	0.935411	1.07478	0.826213	0.974443	0.43038	7.22361	0.569778	3.24683	3.66354	0.646097
354	3.03428	0.557786	1.44122	1.56481	1.31712	0.581362	0.927462	1.07902	0.823422	0.964038	0.443437	7.37146	0.558924	3.20925	3.56474	0.640682
355	3.23273	0.54649	1.46757	1.57244	1.3263	0.562028	0.919512	1.07885	0.823274	0.971143	0.465426	7.51932	0.548069	3.20501	3.46594	0.599553
356	3.43348	0.535194	1.49043	1.57218	1.3344	0.557274	0.908721	1.07869	0.823126	0.978248	0.487415	7.67007	0.548654	3.20447	3.48675	0.558424
357	3.63423	0.5272	1.49933	1.57191	1.3425	0.567097	0.897219	1.07852	0.822978	0.985031	0.509404	7.83238	0.560678	3.20394	3.53747	0.523545
358	3.88667	0.526913	1.50823	1.57164	1.35061	0.576921	0.885717	1.07835	0.82283	0.991063	0.513528	7.99469	0.572702	3.2034	3.58818	0.544915
359	4.15204	0.526625	1.51976	1.58003	1.3512	0.58371	0.875842	1.07818	0.822683	0.997095	0.513186	8.17565	0.577319	3.20287	3.59203	0.566286
360	4.4174	0.526337	1.55498	1.5894	1.35096	0.583418	0.867053	1.07542	0.820607	1.00313	0.512844	8.5244	0.576996	3.20233	3.59067	0.587657
361	4.71771	0.52605	1.59019	1.59876	1.35072	0.583127	0.858263	1.06232	0.810819	0.991274	0.504367	8.87316	0.576674	3.2018	3.58931	0.569369
362	5.04131	0.525763	1.62541	1.61534	1.35048	0.577255	0.845308	1.04921	0.801031	0.977434	0.490468	9.19419	0.570179	3.20127	3.58796	0.546674
363	5.36491	0.525477	1.65875	1.63373	1.35024	0.565803	0.831311	1.04401	0.791244	0.963594	0.476568	9.4043	0.55751	3.20074	3.5866	0.523979
364	5.64193	0.525191	1.69189	1.65212	1.35	0.554351	0.817315	1.05724	0.789169	0.965511	0.492499	9.61441	0.544842	3.20021	3.58525	0.528763
365	5.9073	0.524907	1.72502	1.67999	1.35448	0.555863	0.80534	1.07047	0.789023	0.971367	0.515888	9.82452	0.532175	3.19968	3.5839	0.540417
366	6.17266	0.524622	1.7592	1.71416	1.36209	0.566017	0.798084	1.077	0.788877	0.977224	0.539277	10.072	0.519509	3.19915	3.58256	0.552071
367	6.46869	0.521522	1.79442	1.74834	1.36971	0.576171	0.790828	1.07684	0.788731	0.981267	0.556286	10.3195	0.506843	3.20436	3.58122	0.563727
368	6.78515	0.511851	1.82964	1.77697	1.37242	0.57099	0.783572	1.07667	0.784157	0.981081	0.569041	10.5669	0.502823	3.22296	3.57988	0.575383
369	7.10162	0.502181	1.86174	1.8056	1.35549	0.550474	0.771238	1.0765	0.779584	0.980894	0.581797	10.8872	0.502508	3.24156	3.61432	0.58704
370	7.42275	0.49251	1.88653	1.83422	1.33857	0.529958	0.75834	1.07634	0.77501	0.980708	0.602537	11.2561	0.502193	3.25633	3.65275	0.575545
371	7.76258	0.498855	1.91132	1.86204	1.32165	0.518288	0.745442	1.07618	0.773302	0.975083	0.626698	11.625	0.50188	3.25582	3.69117	0.564051
372	8.1024	0.506979	1.93611	1.88977	1.34196	0.527256	0.733824	1.07601	0.778282	0.968854	0.65086	11.9851	0.50157	3.2553	3.71229	0.552556
373	8.44223	0.515103	1.97486	1.9175	1.36226	0.536225	0.733719	1.07585	0.783262	0.962626	0.674566	12.3322	0.50126	3.25479	3.57773	0.533296
374	8.85012	0.522387	2.01516	1.94952	1.3777	0.545193	0.733615	1.07569	0.786143	0.961306	0.697968	12.6793	0.50095	3.24306	3.44317	0.513174
375	9.28719	0.522116	2.05545	1.98338	1.38581	0.553767	0.73351	1.07553	0.770144	0.967349	0.72137	13.0264	0.500646	3.22654	3.30861	0.493051
376	9.72426	0.521845	2.09727	2.01724	1.39393	0.562242	0.726692	1.07537	0.754144	0.973392	0.7483	13.4604	0.500342	3.21001	3.23432	0.484826
377	10.1572	0.521573	2.14138	2.05658	1.40228	0.570716	0.716997	1.0671	0.738145	0.979435	0.780522	13.8943	0.500038	3.19349	3.18585	0.494448
378	10.5738	0.511332	2.18548	2.11779	1.4116	0.577305	0.707301	1.0568	0.747374	0.979259	0.812744	14.3282	0.49974	3.20993	3.13738	0.504069
379	10.9904	0.501091	2.2324	2.179	1.42091	0.566923	0.697605	1.04651	0.756603	0.979083	0.844966	14.7935	0.499444	3.22638	3.13474	0.513691
380	11.407	0.49085	2.2906	2.24022	1.4301	0.556541	0.690113	1.0383	0.765833	0.977585	0.898157	15.29	0.499147	3.24282	3.17792	0.486848
381	12.0146	0.488596	2.34879	2.30254	1.43909	0.546158	0.682866	1.04887	0.76782	0.96419	0.953676	15.7866	0.496615	3.24234	3.22111	0.455953
382	12.67	0.488337	2.40699	2.36515	1.44807	0.544887	0.675619	1.05943	0.762567	0.950795	1.0092	16.3074	0.485138	3.22492	3.26506	0.425058
383	13.3253	0.488079	2.46811	2.42776	1.45246	0.544628	0.671948	1.07	0.757314	0.9374	1.0585	17.0468	0.473661	3.20751	3.31594	0.419387
384	13.947	0.505785	2.52996	2.49037	1.45225	0.54437	0.671852	1.07062	0.753598	0.935911	1.10159	17.7861	0.462183	3.1901	3.36682	0.438939
385	14.5461	0.525487	2.59182	2.52526	1.45204	0.539058	0.671756	1.06461	0.753471	0.935745	1.14468	18.5255	0.485007	3.18964	3.39785	0.458491
386	15.1453	0.545189	2.66432	2.56014	1.46686	0.528692	0.670522	1.05861	0.753343	0.93558	1.18777	19.1195	0.507831	3.18918	3.34949	0.478042
387	15.7579	0.536965	2.74392	2.59503	1.49168	0.518327	0.666632	1.05494	0.753216	0.935418	1.22002	19.6974	0.530655	3.18872	3.30114	0.487693
388	16.4915	0.516772	2.82352	2.67043	1.51651	0.514035	0.662742	1.0548	0.743874	0.935259	1.25227	20.2753	0.532697	3.18828	3.25278	0.497343
389	17.2251	0.49658	2.90038	2.77282	1.538	0.523911	0.658853	1.05466	0.733509	0.935099	1.28453	20.8958	0.53243	3.18783	3.25167	0.506994
390	17.9587	0.48122	2.97315	2.87522	1.5545	0.533787	0.654967	1.05452	0.723144	0.938356	1.35563	21.8998	0.532163	3.18739	3.25056	0.511694
391	18.8361	0.470692	3.04592	2.97751	1.57099	0.540803	0.651081	1.04853	0.713397	0.945029	1.46557	22.9038	0.524072	3.18696	3.24944	0.511445
392	19.7751	0.460164	3.11869	3.07966	1.58582	0.522079	0.647196	1.04253	0.703916	0.951701	1.57551	23.9078	0.512627	3.18654	3.28613	0.511196
393	20.7141	0.457408	3.18964	3.1818	1.59397	0.503354	0.643515	1.03653	0.694435	0.950358	1.68409	24.9035	0.501183	3.18612	3.33227	0.506611
394	21.6886	0.466312	3.26039	3.28394	1.60213	0.48463	0.639857	1.03054	0.686828	0.936989	1.7906	25.8982	0.49534	3.18571	3.37841	0.463008
395	22.6986	0.475215	3.33114	3.42831	1.61029	0.48811	0.636199	1.02456	0.686718	0.92362	1.89711	26.8929	0.495099	3.18531	3.34448	0.419405
396	23.7085	0.484118	3.42913	3.57737	1.62582	0.506394	0.632595	1.01857	0.686609	0.914221	2.00838	28.0186	0.494858	3.18491	3.25719	0.375801
397	24.7663	0.475846	3.5388	3.72644	1.64136	0.524677	0.629045	1.0161	0.6865	0.920697	2.13863	29.2751	0.491265	3.17436	3.16989	0.45906
398	25.9358	0.465666	3.64847	3.88447	1.65689	0.540161	0.625495	1.01598	0.67984	0.927173	2.26889	30.5317	0.479849	3.14012	3.09123	0.556414
399	27.1053	0.455486	3.75548	4.04634	1.67302	0.530442	0.621944	1.01586	0.670373	0.933648	2.39915	31.7883	0.468433	3.10587	3.0903	0.653768
400	28.2927	0.458685	3.86072	4.20821	1.68954	0.520723	0.6184	1.01521	0.660907	0.933522	2.54128	33.0348	0.460376	3.07162	3.08937	0.644884
401	29.6419	0.467617	3.96595	4.38058	1.70607	0.511004	0.614856	1.00974	0.653315	0.933395	2.68342	34.2813	0.482546	3.07805	3.08844	0.590469
402	30.9911	0.476549	4.0704	4.59498	1.73261	0.501487	0.611311	1.00427	0.653221	0.933269	2.82556	35.5277	0.504717	3.09464	3.08758	0.536054
403	32.3233	0.481665	4.1678	4.80937	1.77418	0.492057	0.607607	0.998803	0.653127	0.922571	2.99618	36.8634	0.526887	3.11124	3.08673	0.508753
404	33.587	0.471517	4.26519	5.02377	1.81575	0.482627	0.603744	0.993341	0.653034	0.909231	3.17393	38.5555	0.506706	3.1172	3.08588	0.508564
405	34.8507	0.461368	4.36259	5.28482	1.85399	0.47875	0.59988	0.987883	0.632463	0.895891	3.35168	40.2476	0.481818	3.09837	3.06146	0.508375
406	36.1145	0.45122	4.50431	5.54588	1.87888	0.497084	0.595074	0.982424	0.611891	0.89412	3.52679	41.9397	0.456931	3.07953	3.0135	0.498434
407	37.5339	0.462072	4.65095	5.80693	1.90378	0.515418	0.588071	0.978039	0.59132	0.90006	3.70016	43.6996	0.456758	3.06425	2.96553	0.465738
408	39.0201	0.472924	4.79759	6.09785	1.92867	0.533752	0.581068	0.983311	0.594637	0.906001	3.87352	45.4885	0.456585	3.08091	2.93174	0.433043
409	40.5063	0.481576	4.94823	6.39624	1.97027	0.545626	0.574065	0.988583	0.603927	0.911339	4.04851	47.2775	0.456412	3.09757	2.93106	0.399637
410	41.8405	0.470429	5.09886	6.69463	2.01187	0.554732	0.57566	0.993854	0.613216	0.911246	4.23816	49.1741	0.450076	3.11423	2.93037	0.359837
411	43.1367	0.459282	5.2495	7.0266	2.05347	0.563837	0.579406	0.989487	0.618162	0.911154	4.42782	51.5013	0.437576	3.12074	2.92969	0.320038
412	44.4329	0.452541	5.38981	7.43696	2.08841	0.567398	0.583151	0.978693	0.612976	0.909605	4.61747	53.8285	0.425077	3.1205	3.0046	0.280239
413	45.7485	0.463428	5.52754	7.84731	2.12168	0.54878	0.584623	0.967898	0.607789	0.902229	4.80227	56.1557	0.426712	3.12026	3.0984	0.303274
414	47.1096	0.474314	5.66527	8.26793	2.15495	0.530161	0.584578	0.958177	0.602091	0.894852	4.98653	58.4285	0.437771	3.11186	3.19221	0.368197
415	48.4707	0.479003	5.81325	8.78092	2.19491	0.511543	0.584533	0.958115	0.591793	0.889668	5.17078	60.7014	0.44883	3.09122	3.19587	0.433121
416	49.8318	0.469228	5.98515	9.29391	2.23932	0.512363	0.579177	0.958052	0.581495	0.889601	5.36671	62.9743	0.450947	3.07057	3.13944	0.460139
417	51.0762	0.459453	6.15706	9.8069	2.28373	0.521514	0.571545	0.957989	0.571197	0.889533	5.58014	65.5126	0.43965	3.06017	3.083	0.430299
418	52.2915	0.449678	6.32896	10.3648	2.3335	0.530665	0.563913	0.952662	0.565518	0.88947	5.79358	68.3161	0.428353	3.06	3.16195	0.400459
419	53.5067	0.4496	6.47965	10.9276	2.38683	0.535812	0.560083	0.94675	0.560353	0.889417	6.00119	71.1197	0.417061	3.05984	3.25594	0.370619
420	54.7402	0.449523	6.63034	11.4905	2.44016	0.524948	0.560054	0.940839	0.555188	0.889364	6.1855	74.0027	0.40579	3.05968	3.34993	0.396839
421	56.0163	0.449446	6.78104	12.1304	2.49378	0.514083	0.560026	0.934512	0.553616	0.889311	6.36981	77.0709	0.394518	3.05956	3.31752	0.429288
422	57.2924	0.449381	6.94258	12.886	2.54994	0.503358	0.558323	0.928006	0.553584	0.889272	6.55412	80.1392	0.383247	3.05943	3.23093	0.461736
423	58.5758	0.44933	7.10683	13.6416	2.60611	0.493192	0.549923	0.921501	0.553551	0.889237	6.73822	83.2498	0.404894	3.05933	3.14434	0.464077
424	59.9253	0.449278	7.27108	14.4561	2.66227	0.483025	0.541523	0.920182	0.549007	0.889201	6.92223	86.7414	0.426541	3.05925	3.07504	0.453513
425	61.2747	0.449227	7.43533	15.506	2.71845	0.472858	0.53564	0.920159	0.543335	0.887357	7.10624	90.233	0.448189	3.05916	3.07488	0.44295
426	62.588	0.440082	7.59961	16.556	2.77464	0.483994	0.53563	0.920136	0.537663	0.881295	7.30566	93.7246	0.447505	3.05232	3.07472	0.436604
427	63.7568	0.430938	7.76389	17.6112	2.83083	0.495129	0.535621	0.920122	0.524798	0.875232	7.52818	96.9942	0.43725	3.03535	3.07456	0.436582
428	64.9255	0.421793	7.92817	18.6786	2.88702	0.505151	0.535612	0.920115	0.511133	0.86917	7.7507	100.239	0.426996	3.01838	3.10471	0.43656
429	66.0943	0.413024	8.09689	19.746	2.95326	0.505151	0.535608	0.920109	0.497468	0.86796	7.96015	103.484	0.422886	3.00141	3.14784	0.448507
430	67.2029	0.40463	8.28339	20.8135	3.02955	0.50515	0.535611	0.920102	0.489442	0.867963	8.15652	106.873	0.443357	2.99973	3.19097	0.50833
431	68.3049	0.396237	8.46988	21.9564	3.10584	0.505149	0.535614	0.904035	0.494571	0.867966	8.35289	110.597	0.463828	2.99975	3.21711	0.568153
432	69.4069	0.387843	8.65638	23.0994	3.18213	0.505176	0.535616	0.887968	0.4997	0.867969	8.52908	114.322	0.484299	2.99977	3.17528	0.571382
433	70.5349	0.385354	8.84305	24.2423	3.25945	0.505205	0.530767	0.871901	0.503807	0.861948	8.69182	118.047	0.516857	2.98627	3.13345	0.442557
434	71.7018	0.385395	9.02978	25.5051	3.33677	0.505234	0.523838	0.866351	0.498708	0.855928	8.85456	122.12	0.554596	2.95247	3.09163	0.313732
435	72.8687	0.385436	9.21652	26.8878	3.4141	0.505276	0.516909	0.871318	0.493609	0.849907	9.01263	126.28	0.592334	2.91868	3.05122	0.184907
436	74.0355	0.385477	9.40326	28.2705	3.49228	0.505337	0.510022	0.876285	0.48851	0.84692	9.12871	130.441	0.630073	2.88489	3.01176	0.220879
437	75.2754	0.393758	9.61903	29.6532	3.57393	0.505399	0.503299	0.881252	0.492249	0.846965	9.24479	134.676	0.667847	2.89688	2.97231	0.298049
438	76.5234	0.402955	9.83802	31.0711	3.65557	0.504538	0.496575	0.878674	0.496971	0.847011	9.36086	139.087	0.705626	2.91395	2.93285	0.375219
439	77.7713	0.412152	10.057	32.5041	3.73722	0.495385	0.489852	0.872863	0.501692	0.847061	9.49389	143.498	0.743405	2.93103	3.02889	0.431031
440	79.0089	0.413844	10.2982	33.9371	3.80788	0.486231	0.491745	0.867052	0.506534	0.847128	9.64387	147.91	0.783846	2.93477	3.1588	0.401405
441	80.2307	0.40428	10.5726	35.3668	3.87121	0.477077	0.49938	0.861576	0.511557	0.847195	9.79385	152.373	0.848246	2.91851	3.28871	0.371779
442	81.4526	0.394716	10.847	36.783	3.93454	0.473495	0.507016	0.856437	0.516579	0.847262	9.94383	156.888	0.912647	2.90225	3.35395	0.342153
443	82.6744	0.386123	11.1174	38.1992	3.99787	0.473628	0.51023	0.851297	0.520083	0.834127	10.0659	161.404	0.977047	2.88599	3.26827	0.333372
444	83.9721	0.386265	11.3817	39.6154	4.06403	0.473761	0.506812	0.846157	0.509913	0.820992	10.1759	165.919	1.03426	2.89651	3.1826	0.333525
445	85.3456	0.386407	11.6461	41.0734	4.1309	0.473894	0.503395	0.851002	0.499744	0.807857	10.286	170.541	1.0627	2.91372	3.09692	0.333678
446	86.7191	0.386556	11.8815	42.629	4.19778	0.474061	0.499977	0.856956	0.489575	0.805317	10.3961	175.176	1.09115	2.93094	3.08042	0.33383
447	88.0926	0.38673	12.0881	44.1846	4.26467	0.474236	0.499696	0.86291	0.49758	0.805426	10.5124	179.81	1.11959	2.93321	3.08121	0.358043
448	89.6298	0.386904	12.2946	45.7403	4.33157	0.474411	0.499765	0.850186	0.507605	0.805542	10.6294	184.484	1.14805	2.90063	3.082	0.384929
449	91.2372	0.387084	12.4956	47.3924	4.39848	0.474586	0.499833	0.829459	0.51763	0.805669	10.7464	189.516	1.17655	2.86804	3.12459	0.411815
450	92.8446	0.387289	12.6741	49.1411	4.46538	0.466475	0.497631	0.808731	0.525096	0.805796	10.8635	194.548	1.20504	2.83546	3.17762	0.438701
451	94.4645	0.387493	12.8527	50.8898	4.53922	0.457444	0.493916	0.790676	0.530858	0.79272	10.9722	199.58	1.23353	2.81301	3.23064	0.393298
452	96.1963	0.396433	13.0313	52.6385	4.61307	0.448413	0.490201	0.796675	0.536619	0.779644	11.0809	204.471	1.2516	2.79491	3.1866	0.347895
453	97.9282	0.406343	13.1954	54.2998	4.68548	0.443099	0.48801	0.802674	0.545391	0.766568	11.1897	209.269	1.26272	2.77681	3.13176	0.302492
454	99.6601	0.416254	13.3533	55.9611	4.74502	0.443359	0.488106	0.808674	0.555452	0.764094	11.2917	214.067	1.27384	2.77698	3.08815	0.268156
455	101.496	0.415345	13.5111	57.6223	4.80457	0.443619	0.488203	0.80379	0.565514	0.76427	11.3869	218.866	1.28498	2.79544	3.08944	0.278088
456	103.577	0.407224	13.6711	59.3247	4.8526	0.443879	0.488305	0.797697	0.576787	0.764446	11.4821	224.211	1.29614	2.8139	3.09072	0.288019
457	105.657	0.399103	13.8497	61.3976	4.88336	0.444174	0.488415	0.791603	0.589877	0.764622	11.5773	229.556	1.30731	2.81965	3.092	0.297951
458	107.737	0.390982	14.0284	63.4705	4.91412	0.444476	0.488525	0.791157	0.602967	0.759816	11.6726	234.901	1.31847	2.77462	3.09342	0.302127
459	110.071	0.383073	14.207	65.5434	4.94488	0.444779	0.486955	0.791338	0.616057	0.754456	11.7679	239.583	1.32907	2.72958	3.09492	0.302466
460	112.405	0.375216	14.3715	67.7161	4.96156	0.437911	0.483705	0.791519	0.626861	0.749096	11.8632	244.099	1.33966	2.71195	3.09642	0.302805
461	114.74	0.367359	14.5266	69.9554	4.97668	0.426264	0.480455	0.768987	0.636142	0.744296	11.9413	248.616	1.35025	2.71258	3.09793	0.311269
462	117.05	0.359502	14.6817	72.1946	4.9918	0.414616	0.477206	0.746455	0.645422	0.744536	12.012	252.568	1.35078	2.71322	3.06864	0.323213
463	119.337	0.359057	14.8343	74.3444	5.00864	0.421888	0.474408	0.723922	0.654703	0.744776	12.0827	255.956	1.34125	2.71386	3.03165	0.335158
464	121.623	0.359435	14.9808	76.4344	5.0295	0.431263	0.47166	0.717326	0.659456	0.745016	12.1622	259.344	1.33172	2.72978	2.99467	0.32555
465	123.981	0.359813	15.1273	78.5244	5.05036	0.440638	0.468912	0.71756	0.664209	0.741965	12.2418	262.732	1.32219	2.74571	2.95768	0.306704
466	126.623	0.360205	15.2739	80.5863	5.07123	0.444776	0.466164	0.717794	0.668961	0.735623	12.2999	265.96	1.32166	2.76164	2.9946	0.287858
467	129.264	0.360632	15.3807	82.5826	5.09304	0.436692	0.463218	0.718027	0.679395	0.729282	12.3438	269.081	1.32213	2.77294	3.03973	0.269954
468	131.906	0.361058	15.4875	84.5788	5.1163	0.428608	0.460186	0.71828	0.698351	0.73128	12.3877	272.202	1.3226	2.74256	3.08486	0.260523
469	134.365	0.361485	15.5943	86.5751	5.13955	0.420524	0.457155	0.718547	0.717306	0.752737	12.4304	275.323	1.32308	2.71219	3.11283	0.251092
470	136.824	0.354211	15.6504	88.4015	5.1628	0.403239	0.454123	0.718813	0.736262	0.774194	12.4626	278.068	1.32361	2.68182	3.11506	0.241662
471	139.282	0.345012	15.6938	90.1854	5.15882	0.376751	0.451385	0.719079	0.756261	0.781619	12.4948	280.718	1.32413	2.65172	3.11728	0.264901
472	141.654	0.335813	15.7372	91.9694	5.15182	0.350264	0.44868	0.716002	0.776377	0.756301	12.527	283.369	1.32466	2.62225	3.11951	0.309919
473	143.894	0.326638	15.7549	93.7533	5.14481	0.323777	0.445975	0.711492	0.796493	0.730984	12.5525	286.019	1.30932	2.59278	3.08314	0.354938
474	146.135	0.317487	15.7467	95.3395	5.13782	0.328556	0.44327	0.706982	0.813644	0.705667	12.5712	288.445	1.29001	2.56332	3.00818	0.399956
475	148.376	0.308336	15.7386	96.9037	5.13085	0.336809	0.442605	0.702471	0.828818	0.699617	12.5899	290.847	1.2707	2.55263	2.93323	0.395202
476	150.678	0.301129	15.729	98.4679	5.12389	0.345062	0.442815	0.693498	0.843992	0.693567	12.6086	293.248	1.25538	2.57013	2.85827	0.369117
477	153.042	0.3017	15.7138	100.032	5.11693	0.353316	0.443025	0.68341	0.86126	0.687516	12.6279	295.576	1.25602	2.58763	2.82994	0.343032
478	155.407	0.30227	15.6985	101.591	5.09917	0.343267	0.442399	0.673321	0.883411	0.690606	12.6486	297.734	1.25666	2.60513	2.83269	0.316947
479	157.771	0.304845	15.6833	103.147	5.07678	0.325375	0.434248	0.664251	0.905563	0.697612	12.6693	299.892	1.25237	2.64224	2.83544	0.304331
480	160.353	0.315439	15.6136	104.703	5.05439	0.307484	0.426096	0.659256	0.924239	0.704618	12.69	302.05	1.22837	2.68424	2.80995	0.295083
481	162.96	0.326033	15.5078	106.259	5.03214	0.291504	0.418888	0.654261	0.934807	0.708335	12.7056	303.852	1.20436	2.72625	2.71854	0.285834
482	165.567	0.336626	15.4019	107.682	5.01044	0.283174	0.415453	0.649267	0.945374	0.708765	12.7161	305.654	1.18127	2.68709	2.62714	0.279577
483	167.805	0.317949	15.2905	109.092	4.98874	0.274844	0.412018	0.651694	0.956286	0.709194	12.7266	307.456	1.16032	2.63891	2.54101	0.280299
484	169.886	0.299271	15.1707	110.501	4.96703	0.266514	0.408583	0.657302	0.970296	0.709624	12.7371	308.858	1.13936	2.59074	2.5023	0.281021
485	171.967	0.280593	15.0509	111.91	4.94228	0.275384	0.408481	0.66291	0.984305	0.698545	12.7349	310.16	1.11841	2.55202	2.4636	0.281744
486	174.048	0.275495	14.9277	113.046	4.91549	0.295721	0.408749	0.667432	0.998315	0.686188	12.7242	311.461	1.10836	2.53538	2.42489	0.282527
487	176.129	0.276218	14.7735	114.183	4.8887	0.316057	0.409016	0.662178	1.01048	0.673832	12.7136	312.053	1.09831	2.51875	2.36153	0.28331
488	178.21	0.276941	14.6194	115.32	4.86191	0.318754	0.407272	0.656925	1.02079	0.669191	12.7029	312.468	1.08827	2.50211	2.27351	0.284093
489	180.291	0.281556	14.4652	116.425	4.82837	0.280291	0.404186	0.651671	1.03111	0.669695	12.6923	312.882	1.0789	2.48707	2.18549	0.263875
490	182.342	0.292007	14.3043	117.485	4.79194	0.241828	0.4011	0.643298	1.03853	0.670199	12.6817	312.786	1.06983	2.47204	2.11583	0.212154
491	184.385	0.302459	14.1416	118.544	4.7555	0.203365	0.398013	0.634145	1.03439	0.670703	12.6711	312.178	1.06075	2.457	2.11962	0.160433
492	186.429	0.311062	13.9789	119.597	4.71873	0.213189	0.395211	0.624991	1.03025	0.66537	12.6146	311.571	1.05168	2.4486	2.12341	0.118423
493	188.074	0.303031	13.7939	120.592	4.67898	0.223013	0.392409	0.615838	1.0261	0.660037	12.558	310.964	1.04267	2.45014	2.1272	0.163815
494	189.619	0.295	13.5865	121.588	4.63922	0.232838	0.389607	0.610686	1.02198	0.654704	12.5015	310.23	1.03366	2.45169	2.15861	0.209206
495	191.165	0.28697	13.3791	122.584	4.59946	0.23909	0.386781	0.60598	1.01787	0.649173	12.4483	309.482	1.02465	2.45323	2.20845	0.254597
496	192.682	0.278566	13.1812	123.414	4.55057	0.239983	0.383744	0.601273	1.01376	0.643345	12.3967	308.734	1.01071	2.42852	2.25828	0.2869
497	194.086	0.269789	12.9928	124.203	4.4994	0.240876	0.380706	0.596577	1.00965	0.637518	12.345	307.757	0.991823	2.39725	2.30706	0.266854
498	195.49	0.261012	12.8044	124.991	4.44824	0.240876	0.377669	0.591908	0.99647	0.632335	12.2891	306.242	0.972939	2.36598	2.35337	0.246808
499	196.894	0.25418	12.574	125.769	4.39451	0.23284	0.370808	0.587238	0.983288	0.632961	12.1953	304.728	0.954055	2.34132	2.39968	0.226762
500	198.222	0.255133	12.3331	126.505	4.33059	0.224803	0.360122	0.582569	0.970106	0.633587	12.1015	303.213	0.923839	2.34309	2.44598	0.24462
501	199.5	0.256086	12.0933	127.241	4.26666	0.216766	0.349437	0.577593	0.960413	0.634213	12.0077	301.465	0.892364	2.34486	2.39906	0.266691
502	200.778	0.25318	11.8629	127.977	4.20273	0.213258	0.340965	0.572486	0.955954	0.633764	11.9039	299.367	0.860889	2.34664	2.31217	0.288761
503	202.056	0.234842	11.6326	128.743	4.15038	0.214279	0.341348	0.567379	0.951495	0.629011	11.79	297.269	0.848988	2.33072	2.22528	0.285639
504	203.113	0.216505	11.3938	129.582	4.09931	0.2153	0.341731	0.559557	0.945549	0.624259	11.6762	295.104	0.850136	2.31284	2.1019	0.265722
505	204.171	0.198167	11.1425	130.42	4.04824	0.216321	0.342119	0.547663	0.926222	0.619506	11.5601	292.339	0.851284	2.29496	1.92376	0.245805
506	205.228	0.197294	10.8912	131.259	3.99052	0.2174	0.342524	0.535769	0.906894	0.614632	11.4348	289.574	0.852431	2.29496	1.74563	0.235107
507	206.254	0.198361	10.6398	132.051	3.91726	0.218485	0.342929	0.526616	0.887567	0.609473	11.3095	286.809	0.821098	2.29695	1.60597	0.245922
508	207.233	0.199429	10.3695	132.823	3.844	0.219571	0.343335	0.521578	0.864877	0.604315	11.1842	283.772	0.789765	2.29894	1.81255	0.256738
509	208.212	0.200547	10.0943	133.595	3.77074	0.210197	0.334895	0.516539	0.841345	0.599156	11.0523	280.666	0.758432	2.28008	2.01913	0.267553
510	209.19	0.201672	9.81921	134.355	3.70546	0.193851	0.325472	0.512072	0.817814	0.598146	10.9197	277.561	0.749935	2.24731	2.20116	0.271673
511	210.069	0.202796	9.54805	135.006	3.64359	0.177506	0.316049	0.512756	0.803935	0.598914	10.787	274.361	0.751225	2.21455	2.16224	0.272922
512	210.921	0.203969	9.31261	135.656	3.58173	0.16116	0.308602	0.51344	0.804535	0.599682	10.6202	270.314	0.752514	2.18878	2.12331	0.274172
513	211.774	0.205154	9.07717	136.306	3.51446	0.160625	0.309058	0.514124	0.805134	0.600449	10.4191	266.268	0.746663	2.191	2.08438	0.275443
514	212.624	0.206339	8.84173	136.95	3.43457	0.161847	0.309513	0.514824	0.790457	0.599224	10.218	262.221	0.72415	2.19322	2.07676	0.276766
515	213.468	0.203123	8.58697	137.532	3.35467	0.163069	0.309969	0.515547	0.769233	0.595008	10.0262	257.579	0.701636	2.19544	2.08256	0.278088
516	214.313	0.195507	8.3129	138.113	3.27478	0.167548	0.303818	0.516271	0.748009	0.590792	9.84363	252.789	0.679794	2.18296	2.08836	0.27941
517	215.138	0.187891	8.03882	138.695	3.1646	0.179624	0.296932	0.515956	0.729357	0.586576	9.66104	247.999	0.659519	2.16884	2.0775	0.273424
518	215.793	0.180275	7.7706	139.298	3.05442	0.191701	0.290047	0.506297	0.711807	0.581363	9.47157	243.229	0.639244	2.15471	2.04166	0.264305
519	216.449	0.180702	7.52581	139.924	2.94424	0.191731	0.28152	0.496639	0.694258	0.572164	9.25455	238.465	0.618968	2.14063	2.00582	0.255187
520	217.104	0.182024	7.28103	140.549	2.8512	0.163652	0.271899	0.486981	0.676075	0.562964	9.03753	233.701	0.600577	2.12664	1.96998	0.246096
521	217.676	0.183345	7.03052	141.145	2.78387	0.135573	0.262278	0.477865	0.65219	0.553765	8.82052	228.557	0.582186	2.11265	2.00063	0.237048
522	218.227	0.1821	6.7571	141.62	2.71654	0.107495	0.252656	0.469293	0.628305	0.544565	8.60935	223.033	0.563795	2.09866	2.0479	0.227999
523	218.777	0.174865	6.48368	142.095	2.64921	0.118431	0.256228	0.460721	0.60442	0.550098	8.39884	217.51	0.549814	2.08508	2.09517	0.22103
524	219.237	0.167631	6.2128	142.571	2.57284	0.129368	0.2598	0.452148	0.580897	0.555631	8.18833	211.938	0.542448	2.07167	2.13839	0.232771
525	219.673	0.160396	5.96468	143.032	2.48744	0.140304	0.263372	0.445883	0.560624	0.561164	7.95212	206.318	0.535083	2.05825	2.14518	0.244512
526	220.109	0.148561	5.71657	143.489	2.40204	0.145569	0.266943	0.441926	0.540352	0.566697	7.6902	200.697	0.527717	2.04484	2.15198	0.256253
527	220.448	0.133659	5.46845	143.947	2.31664	0.147052	0.260755	0.437969	0.520079	0.566072	7.42828	195.077	0.51295	2.01466	2.15877	0.247412
528	220.639	0.118757	5.22726	144.331	2.22343	0.148536	0.254566	0.434012	0.500375	0.556211	7.16637	189.826	0.48708	1.98447	2.12702	0.22975
529	220.831	0.103856	4.98781	144.425	2.12827	0.152469	0.248378	0.430155	0.482942	0.546351	6.91402	184.668	0.46121	1.95428	2.05671	0.212089
530	221.023	0.100469	4.74835	144.519	2.03311	0.16212	0.243686	0.426365	0.465509	0.53649	6.66273	179.51	0.435341	1.93732	1.98641	0.195425
531	220.904	0.102017	4.52081	144.613	1.93848	0.17177	0.24124	0.422575	0.448077	0.532082	6.41145	174.352	0.423286	1.9402	1.91611	0.187741
532	220.707	0.103566	4.30519	144.707	1.84599	0.18142	0.238794	0.418784	0.435247	0.533126	6.16494	169.561	0.425047	1.94308	1.8925	0.180057
533	220.511	0.105114	4.08957	144.716	1.75349	0.18278	0.236348	0.420961	0.425486	0.53417	5.92956	164.811	0.426807	1.94596	1.90001	0.172373
534	220.271	0.100989	3.87587	144.725	1.661	0.164794	0.232428	0.427116	0.415724	0.535215	5.69419	160.061	0.428568	1.93741	1.90752	0.180036
535	219.644	0.0944315	3.67953	144.734	1.57094	0.146809	0.226298	0.433271	0.399886	0.533248	5.45881	155.434	0.398566	1.92397	1.91503	0.210721
536	219.017	0.0878745	3.4832	144.742	1.48332	0.128823	0.220168	0.439425	0.37797	0.519236	5.22505	151.305	0.360623	1.91052	1.84735	0.241405
537	218.389	0.0813175	3.28686	144.48	1.3957	0.139276	0.214038	0.423358	0.356055	0.505225	4.99504	147.175	0.322681	1.89699	1.7713	0.27209
538	217.541	0.0877577	3.10965	144.218	1.31145	0.14973	0.218586	0.407291	0.33414	0.491214	4.76503	143.045	0.288841	1.8827	1.69526	0.257205
539	216.471	0.0974473	2.93723	143.956	1.24073	0.160183	0.225804	0.391224	0.319729	0.477202	4.53501	139.34	0.271413	1.86842	1.64449	0.230929
540	215.401	0.107137	2.7648	143.694	1.17	0.165091	0.233022	0.380026	0.306152	0.46692	4.31114	135.917	0.253984	1.85413	1.65271	0.204653
541	214.33	0.116826	2.60582	143.084	1.09927	0.157059	0.238236	0.370914	0.292574	0.456638	4.0899	132.495	0.236556	1.827	1.66092	0.183125
542	212.49	0.104713	2.45259	142.326	1.03499	0.149028	0.225411	0.361802	0.281279	0.446356	3.86866	129.072	0.23382	1.79435	1.66914	0.204334
543	210.457	0.0871492	2.29937	141.568	0.977159	0.140996	0.212587	0.35269	0.272265	0.439521	3.6374	126.3	0.245777	1.7617	1.67756	0.225543
544	208.424	0.0695852	2.15286	140.678	0.919324	0.134756	0.199762	0.35376	0.263251	0.440726	3.38274	123.601	0.257735	1.7365	1.68612	0.246753
545	206.391	0.0617276	2.01644	139.59	0.86149	0.128516	0.195345	0.354831	0.254459	0.441931	3.12808	120.902	0.269692	1.72247	1.69468	0.243057
546	203.266	0.0635764	1.88001	138.503	0.805154	0.122277	0.199336	0.355901	0.246556	0.443136	2.87343	118.203	0.244334	1.70844	1.68316	0.214458
547	200.02	0.0654252	1.74359	137.415	0.748986	0.116037	0.203326	0.350743	0.238652	0.435905	2.66965	116.079	0.21483	1.69441	1.59134	0.185858
548	196.773	0.0673005	1.63942	135.537	0.692817	0.117969	0.207317	0.341435	0.230749	0.42305	2.47153	114.02	0.185326	1.73088	1.49952	0.164079
549	193.361	0.0692157	1.54908	133.32	0.637213	0.1199	0.200124	0.332126	0.224883	0.410195	2.27341	111.961	0.166821	1.76735	1.41815	0.203677
550	189.287	0.0711308	1.45874	131.103	0.583864	0.121832	0.190135	0.322817	0.221056	0.405829	2.09233	110.083	0.159316	1.80382	1.3786	0.243275
551	185.212	0.073046	1.3684	128.886	0.530515	0.116176	0.180147	0.318903	0.217228	0.407122	1.95102	108.63	0.15181	1.79927	1.33904	0.282873
552	181.138	0.0847031	1.25981	126.347	0.477166	0.0991389	0.174458	0.314989	0.210906	0.408416	1.8097	107.176	0.144305	1.7332	1.30896	0.299088
553	176.428	0.0963602	1.15121	123.807	0.441145	0.0821017	0.175219	0.311076	0.182136	0.40723	1.66839	105.722	0.136651	1.66713	1.3642	0.280231
554	171.081	0.108017	1.04261	121.268	0.409455	0.0650644	0.175979	0.30704	0.153366	0.396123	1.53328	104.385	0.12896	1.60107	1.41943	0.261373
555	165.735	0.100874	0.956712	118.694	0.377765	0.076659	0.17674	0.302722	0.124595	0.385017	1.40231	103.126	0.121269	1.58743	1.47467	0.240544
556	160.388	0.0856722	0.904854	115.807	0.346075	0.0882536	0.174896	0.298403	0.127404	0.37391	1.27135	101.867	0.117892	1.57379	1.42825	0.20197
557	153.227	0.0704709	0.852997	112.921	0.324707	0.0998481	0.172401	0.294084	0.138107	0.363395	1.14038	100.608	0.131775	1.56016	1.35642	0.163397
558	145.611	0.0552696	0.801139	110.034	0.305921	0.105774	0.169905	0.294767	0.14881	0.353026	1.02797	99.6171	0.145657	1.53928	1.28459	0.124824
559	137.995	0.0573955	0.751852	106.393	0.287134	0.10792	0.167085	0.296005	0.149326	0.342658	0.917613	98.8047	0.157339	1.51358	1.21207	0.121439
560	130.35	0.0595215	0.703667	101.618	0.268348	0.110067	0.161333	0.297244	0.134562	0.333406	0.807258	97.9923	0.149212	1.48788	1.13337	0.133136
561	122.696	0.0616474	0.655482	96.8437	0.244075	0.112214	0.155582	0.29566	0.119797	0.328616	0.701086	97.1799	0.141085	1.46218	1.05467	0.144833
562	115.043	0.0694476	0.608607	92.0693	0.219193	0.0949992	0.149831	0.291254	0.109801	0.323826	0.611646	96.832	0.132958	1.44473	0.975976	0.15653
563	106.782	0.0810305	0.564787	87.1018	0.194311	0.0756336	0.144288	0.286848	0.110929	0.319036	0.522205	96.5358	0.125485	1.43279	1.01685	0.148723
564	97.611	0.0926135	0.520968	82.1343	0.169429	0.0562679	0.139058	0.282483	0.112057	0.314281	0.432765	96.2396	0.118291	1.42085	1.10896	0.140916
565	88.4397	0.100559	0.476854	77.1668	0.155645	0.0649507	0.133829	0.278283	0.114184	0.309536	0.407761	96.1557	0.111098	1.4089	1.20108	0.133109
566	79.2684	0.0939543	0.431563	72.2233	0.143095	0.07675	0.128599	0.274083	0.120311	0.304791	0.389916	96.2135	0.103904	1.39817	1.29319	0.137591
567	69.8862	0.0873497	0.386271	67.2957	0.130544	0.0885493	0.123184	0.269883	0.126437	0.302552	0.372071	96.2712	0.085403	1.38757	1.21516	0.150265
568	60.5041	0.0807451	0.347112	62.3681	0.120892	0.091249	0.117491	0.265714	0.132564	0.304074	0.350138	96.3289	0.0669021	1.37697	1.13713	0.162939
569	51.1219	0.0738683	0.33248	57.4406	0.122832	0.0848493	0.111797	0.261553	0.134249	0.305596	0.311858	95.9424	0.0484012	1.36637	1.05909	0.171484
570	44.2411	0.0668102	0.317848	52.7527	0.124772	0.0784496	0.106104	0.257392	0.135442	0.307118	0.273578	95.5066	0.0425845	1.35306	0.985576	0.163511
571	37.6382	0.059752	0.303217	48.0914	0.126712	0.0720498	0.105027	0.251398	0.136634	0.297248	0.235298	95.0708	0.045224	1.33945	0.915071	0.155538
572	31.0352	0.0545847	0.296315	43.4302	0.114913	0.0727066	0.105928	0.242655	0.122427	0.287379	0.206413	94.6849	0.0478634	1.32584	0.844566	0.147566
573	24.8944	0.0569808	0.291345	39.0061	0.0996788	0.0751275	0.106829	0.233912	0.10437	0.277509	0.186924	94.3491	0.0505029	1.30216	0.774061	0.158301
574	20.6017	0.0593768	0.286375	35.531	0.084445	0.0775485	0.104521	0.225169	0.0863134	0.26735	0.167435	94.0132	0.0445034	1.27176	0.857275	0.171116
575	16.3091	0.0617729	0.281406	32.0558	0.0813068	0.0791016	0.0947245	0.223552	0.0759822	0.256516	0.147954	93.6939	0.0375439	1.24136	0.957568	0.18393
576	12.0164	0.0573199	0.269891	28.5807	0.0833526	0.0728444	0.084928	0.224989	0.0772393	0.245682	0.128541	93.5239	0.0305845	1.21447	1.05786	0.196366
577	9.6315	0.0511547	0.25674	25.7228	0.0853983	0.0665872	0.0751314	0.226426	0.0784965	0.234848	0.109128	93.3539	0.0255754	1.20163	1.03225	0.208426
578	7.45859	0.0449894	0.24359	23.4821	0.087444	0.06033	0.0777425	0.227863	0.0797536	0.235252	0.0897146	93.1839	0.0283677	1.18878	0.880741	0.220485
579	5.28568	0.0396935	0.23056	21.2415	0.0816914	0.0541003	0.0817323	0.219963	0.0714024	0.236906	0.0859858	93.3931	0.0311601	1.17594	0.729229	0.232544
580	4.10661	0.0422211	0.218623	19.0008	0.0759389	0.0479119	0.0857221	0.212063	0.0630511	0.23856	0.0889788	94.171	0.0339524	1.16432	0.577718	0.23716
581	3.17601	0.0447488	0.206685	17.2622	0.0701863	0.0417235	0.0897118	0.204163	0.0546999	0.237375	0.0919718	94.949	0.0367944	1.153	0.557071	0.239916
582	2.24541	0.0472764	0.194748	15.649	0.060518	0.0355351	0.0791677	0.196263	0.0492596	0.233353	0.0888312	95.6624	0.0396488	1.14169	0.56914	0.242672
583	1.38146	0.0564189	0.184235	14.0358	0.0482392	0.0355157	0.0670087	0.197781	0.04576	0.229331	0.0713788	96.2251	0.042509	1.1303	0.581209	0.243609
584	1.11741	0.0683963	0.186551	12.6686	0.0359603	0.0381402	0.0548497	0.199299	0.0422603	0.225308	0.0539263	96.7879	0.045421	1.11819	0.593396	0.228177
585	0.85336	0.0803737	0.188867	11.6701	0.0236815	0.0407646	0.0453229	0.200816	0.0388452	0.220432	0.0364739	97.3507	0.0483331	1.10608	0.605761	0.212745
586	0.589311	0.0839185	0.191182	10.6716	0.0184347	0.0434062	0.0463246	0.195734	0.0357682	0.215343	0.031378	97.5018	0.0512451	1.09397	0.618126	0.197314
587	0.383939	0.0677872	0.193498	9.67307	0.0139693	0.0460877	0.0473264	0.186253	0.0326911	0.210253	0.0345198	97.3786	0.0644517	1.07287	0.63049	0.190441
588	0.315481	0.0516559	0.188203	8.99783	0.00950389	0.0487692	0.0483282	0.176771	0.029614	0.209967	0.0376616	97.2553	0.0776582	1.04577	0.61449	0.20354
589	0.247023	0.0355246	0.182908	8.3226	0.00503847	0.0493729	0.0493481	0.171478	0.0239467	0.211739	0.0408178	97.1321	0.0908647	1.01867	0.586334	0.216639
590	0.184024	0.0281368	0.177613	7.64736	0.0129534	0.041665	0.0503726	0.182938	0.0156892	0.213511	0.0440312	97.2633	0.0884563	0.99157	0.558177	0.229738
591	0.142864	0.0217204	0.174634	7.02005	0.0222439	0.0339572	0.0513972	0.194398	0.00743175	0.213428	0.0472446	97.4227	0.0704331	0.964572	0.530021	0.216833
592	0.101703	0.0153041	0.177061	6.50458	0.0315344	0.027299	0.0521042	0.205859	0.00100385	0.209014	0.050458	97.5822	0.0524099	0.937586	0.583788	0.201039
593	0.060543	0.0163139	0.179487	5.9891	0.0393418	0.0300871	0.0499539	0.209328	0.0110424	0.2046	0.0578043	97.6471	0.0364991	0.910599	0.637556	0.185244
594	0.0340859	0.028463	0.181914	5.47363	0.033801	0.0328753	0.0478036	0.200812	0.0210809	0.200187	0.0713496	97.5703	0.0396001	0.890042	0.691323	0.171337
595	0.0223321	0.040612	0.170579	5.06882	0.0282602	0.0356634	0.0456533	0.192296	0.0311195	0.195805	0.084895	97.4934	0.042701	0.895202	0.732928	0.164983
596	0.0105784	0.052761	0.157715	4.67632	0.0227195	0.0327715	0.0434837	0.183779	0.0371328	0.191426	0.0984404	97.4165	0.045802	0.900361	0.746153	0.158628
597	0.0021702	0.0469472	0.144852	4.28382	0.0337004	0.0260931	0.0412689	0.178521	0.0337538	0.187048	0.0814003	97.2994	0.0489454	0.90552	0.759377	0.152274
598	0.0238723	0.0411335	0.13656	3.94389	0.051762	0.0194146	0.0390541	0.174659	0.0303748	0.182385	0.051252	97.1649	0.0521069	0.895455	0.772602	0.167423
599	0.0455743	0.0353197	0.146553	3.65655	0.0698236	0.0164005	0.0368393	0.170797	0.0269959	0.177436	0.0211038	97.0305	0.0552684	0.881584	0.765548	0.204075
600	0.0672763	0.0321097	0.156547	3.3692	0.0780174	0.0280441	0.0366074	0.168598	0.0236398	0.172488	0.00102232	96.8961	0.05843	0.867712	0.738216	0.240727
601	0.0660182	0.0349752	0.166541	3.08186	0.0631864	0.0396876	0.0376974	0.170282	0.0202863	0.170282	0.00443005	96.7619	0.0500957	0.879143	0.710883	0.250959
602	0.05492	0.0378407	0.170227	2.85058	0.0483553	0.0513311	0.0387874	0.171966	0.0169328	0.17219	0.00783778	96.6277	0.0417614	0.901416	0.683551	0.22156
603	0.0438217	0.0407062	0.164451	2.61929	0.0354513	0.050108	0.0398773	0.17365	0.0184116	0.174098	0.0112455	96.4935	0.0334271	0.92369	0.716544	0.192161
604	0.0359804	0.0354051	0.158675	2.38801	0.0302553	0.0360182	0.0378593	0.170082	0.0247226	0.176006	0.0244656	96.2763	0.0447415	0.931121	0.764619	0.173358
605	0.0411667	0.0291966	0.152899	2.17953	0.0250592	0.0219284	0.035496	0.16593	0.0310336	0.177943	0.0387759	96.0499	0.058239	0.879176	0.812695	0.19694
606	0.046353	0.0229881	0.138816	2.02423	0.0198632	0.00783865	0.0331326	0.161778	0.0368648	0.179882	0.0530862	95.8235	0.0717365	0.827231	0.86077	0.220523
607	0.0498783	0.0242011	0.124733	1.86893	0.0145358	0.00570606	0.0321648	0.161747	0.0383774	0.181822	0.0581792	95.5943	0.0811605	0.779118	0.86501	0.244105
608	0.0384547	0.0365463	0.110649	1.71363	0.00915218	0.00869796	0.03329	0.163482	0.03989	0.182559	0.0494461	95.3611	0.0844743	0.765489	0.803497	0.251398
609	0.0270311	0.0488916	0.106606	1.5701	0.00376854	0.0116899	0.0344153	0.165217	0.0414025	0.178483	0.0407129	95.1278	0.087788	0.75186	0.741985	0.254619
610	0.0156075	0.0612368	0.109257	1.42788	0.0101745	0.0147062	0.0355405	0.163328	0.038595	0.174407	0.0418242	94.8945	0.0876488	0.738231	0.680472	0.257839
611	0.0272551	0.0539331	0.111907	1.28567	0.0440893	0.0177387	0.0366809	0.152983	0.0353075	0.170331	0.0659059	94.512	0.0794526	0.726359	0.64925	0.245217
612	0.0487904	0.0466294	0.114558	1.16634	0.0780041	0.0207712	0.0378213	0.142639	0.03202	0.17486	0.0899875	94.1295	0.0712564	0.714488	0.663465	0.20883
613	0.0703256	0.0393257	0.117228	1.08136	0.111919	0.0238038	0.0389616	0.134719	0.0311518	0.183078	0.114069	93.7471	0.0653783	0.702616	0.677679	0.172444
614	0.0886331	0.0495305	0.119918	0.996377	0.103859	0.0351953	0.0421935	0.136497	0.0327027	0.191296	0.111628	91.8394	0.0687727	0.701246	0.691894	0.136058
615	0.0940295	0.0616806	0.122609	0.911393	0.0911355	0.0475155	0.0468198	0.138275	0.0342537	0.19392	0.0915047	88.915	0.0721672	0.706876	0.657235	0.0986568
616	0.0994259	0.0738308	0.125299	0.83748	0.0784119	0.0598358	0.051446	0.140053	0.0358114	0.183492	0.0713816	85.9906	0.0755616	0.712507	0.589994	0.0611432
617	0.104822	0.0748344	0.128002	0.763566	0.0718018	0.0684695	0.0550695	0.138564	0.037379	0.173064	0.0696971	83.0662	0.0708956	0.714656	0.522753	0.0236296
618	0.110248	0.0591183	0.130725	0.689653	0.0743619	0.0715732	0.049668	0.135674	0.0389466	0.162636	0.0956704	79.0427	0.062775	0.685479	0.455512	0.0750163
619	0.115704	0.0434022	0.133449	0.629931	0.0769219	0.0746769	0.0442666	0.132783	0.0405143	0.163428	0.121644	74.7445	0.0546544	0.656301	0.461889	0.215303
620	0.12116	0.0276861	0.136172	0.584402	0.0749118	0.0750145	0.0388652	0.129893	0.0384994	0.165467	0.147617	70.4463	0.053483	0.627123	0.476446	0.35559
621	0.126615	0.0307781	0.133687	0.538872	0.0622378	0.0688977	0.0360957	0.13405	0.0360865	0.167505	0.107906	68.5134	0.0569443	0.622392	0.491003	0.495877
622	0.115437	0.0338701	0.12897	0.493343	0.0495637	0.0627809	0.037274	0.141227	0.0336736	0.164572	0.068194	67.5942	0.0604056	0.628137	0.501598	0.483179
623	0.104259	0.0369621	0.124252	0.441782	0.0368897	0.0566641	0.0384523	0.148404	0.0312607	0.154182	0.0284825	66.675	0.0621263	0.633883	0.476547	0.404917
624	0.0930816	0.0400591	0.119535	0.388713	0.036438	0.0579654	0.0396306	0.153524	0.0320571	0.143793	0.016062	65.7558	0.0568842	0.639629	0.451496	0.326654
625	0.0919375	0.043176	0.128281	0.335644	0.0390418	0.0611212	0.0345675	0.15042	0.0336558	0.133403	0.0309324	65.1575	0.0516422	0.599688	0.426445	0.285898
626	0.0974827	0.046293	0.138522	0.304614	0.0416457	0.0642771	0.0288108	0.147316	0.0352546	0.141519	0.0458028	64.5949	0.0464002	0.554671	0.437842	0.332657
627	0.103028	0.04941	0.148764	0.288277	0.0470669	0.0609725	0.0230542	0.144212	0.0368544	0.149635	0.0606436	64.0322	0.0437808	0.509654	0.534282	0.379417
628	0.110109	0.0525421	0.156591	0.27194	0.0567143	0.0548992	0.0212934	0.143087	0.0384636	0.157751	0.075218	63.4877	0.0647654	0.498922	0.630723	0.420723
629	0.131017	0.0556781	0.142688	0.256712	0.0663617	0.0488259	0.0255262	0.144931	0.0400728	0.16027	0.0897925	63.106	0.08575	0.539617	0.727163	0.412942
630	0.151925	0.058814	0.128785	0.242591	0.0760091	0.0446057	0.0297591	0.146775	0.041682	0.157193	0.104367	62.7243	0.106735	0.580312	0.734398	0.405162
631	0.172833	0.0592179	0.114882	0.22847	0.0768711	0.0477977	0.0339919	0.148618	0.0432958	0.154115	0.10645	62.3426	0.127719	0.621006	0.682163	0.397381
632	0.187619	0.053247	0.112673	0.21435	0.0718763	0.0509896	0.0344534	0.139751	0.0449127	0.151038	0.100205	61.9507	0.113787	0.611259	0.629927	0.373416
633	0.19322	0.0472761	0.115475	0.190958	0.0668815	0.0541816	0.0292579	0.130884	0.0465296	0.14761	0.0939596	61.5545	0.0998554	0.601511	0.577692	0.349451
634	0.198822	0.0413052	0.118277	0.167567	0.0642208	0.0573746	0.0240624	0.122016	0.0481464	0.143656	0.0877145	61.1583	0.0859236	0.591764	0.521124	0.325486
635	0.204423	0.0493586	0.12108	0.144176	0.0825681	0.0605772	0.018867	0.116043	0.049767	0.139702	0.0894706	60.7621	0.0719917	0.581752	0.425556	0.301523
636	0.196603	0.0609181	0.123889	0.131879	0.100915	0.0637798	0.0195937	0.112963	0.0513885	0.135748	0.0932269	60.4105	0.0737884	0.570682	0.329989	0.277567
637	0.187291	0.0724776	0.126697	0.126978	0.119263	0.0669824	0.0242686	0.109883	0.05301	0.131637	0.0969833	60.0886	0.0773327	0.559612	0.234421	0.253611
638	0.177979	0.084037	0.129506	0.122077	0.109095	0.070185	0.0289434	0.106803	0.052759	0.127509	0.10074	59.7668	0.0808771	0.548542	0.138854	0.229655
639	0.171652	0.0871978	0.132315	0.117177	0.0867079	0.0575997	0.0332711	0.111041	0.0496993	0.123381	0.115665	59.4476	0.0833025	0.524922	0.194627	0.209351
640	0.192194	0.0903586	0.135125	0.112276	0.0643203	0.0450145	0.0344742	0.118415	0.0466396	0.122364	0.13059	59.1525	0.0756579	0.495923	0.250401	0.194526
641	0.212735	0.0935194	0.137935	0.107375	0.0582618	0.0324292	0.0356773	0.125789	0.0435799	0.124458	0.145515	58.8574	0.0680132	0.466923	0.306174	0.179701
642	0.233276	0.0966801	0.151385	0.102474	0.0685323	0.0198439	0.0368804	0.131508	0.0447329	0.126553	0.166753	58.5623	0.0603686	0.448382	0.361618	0.164876
643	0.253814	0.0998362	0.171929	0.0975732	0.0788028	0.0471708	0.0380821	0.133363	0.0463539	0.128647	0.192202	58.2805	0.0627901	0.454243	0.416294	0.177437
644	0.274343	0.102992	0.192473	0.100522	0.0890733	0.0789324	0.039283	0.135217	0.047975	0.130737	0.21765	58.0299	0.0663301	0.460104	0.47097	0.208255
645	0.294872	0.106147	0.193756	0.10347	0.0830954	0.110694	0.0404838	0.137072	0.0530441	0.132826	0.236931	57.7793	0.0698701	0.465965	0.525646	0.239072
646	0.315401	0.104737	0.16615	0.106419	0.0771175	0.11965	0.0413268	0.138922	0.0632855	0.134915	0.20071	57.5287	0.081585	0.422754	0.560417	0.26989
647	0.328455	0.0987596	0.138543	0.113625	0.0711395	0.1058	0.0389489	0.14077	0.0735268	0.137004	0.164489	57.2666	0.0953436	0.367276	0.575282	0.249568
648	0.334034	0.0927826	0.134037	0.12509	0.0792256	0.0919505	0.036571	0.142618	0.0837681	0.139083	0.128268	56.9931	0.109102	0.311798	0.590148	0.216461
649	0.339614	0.0868056	0.144932	0.136555	0.0888744	0.0781008	0.0341931	0.140944	0.0857558	0.141162	0.107283	56.7195	0.119786	0.345902	0.605014	0.183353
650	0.345183	0.0600038	0.155827	0.14802	0.0985232	0.0903254	0.0343124	0.136921	0.0822411	0.14324	0.121848	56.4459	0.123295	0.389961	0.619848	0.150246
651	0.35073	0.033202	0.165098	0.142407	0.106633	0.113725	0.0355021	0.132899	0.0787263	0.145313	0.136414	56.1722	0.126803	0.43402	0.634606	0.218687
652	0.356277	0.00640021	0.159756	0.136794	0.100893	0.137124	0.0366918	0.126928	0.0793705	0.147377	0.150979	55.8985	0.128263	0.420353	0.649364	0.287128
653	0.355333	0.0274645	0.154414	0.131181	0.0951529	0.133357	0.0311705	0.118034	0.0862529	0.149441	0.147354	55.6248	0.111283	0.392254	0.664123	0.355569
654	0.328423	0.0604953	0.149073	0.125554	0.0894128	0.102425	0.0239715	0.109141	0.0931352	0.151505	0.13918	55.3848	0.0943034	0.364156	0.657236	0.357337
655	0.301513	0.0935261	0.13885	0.119915	0.084295	0.0714918	0.0167725	0.100248	0.0953544	0.1357	0.131006	55.1784	0.0773237	0.35176	0.628704	0.342437
656	0.274604	0.0976362	0.125373	0.114275	0.0792462	0.040559	0.017106	0.110631	0.0866927	0.11791	0.12342	54.972	0.0658861	0.376004	0.600173	0.327537
657	0.295156	0.082466	0.111896	0.108636	0.0741974	0.0546967	0.0182764	0.123156	0.078031	0.10012	0.116226	54.7656	0.0581434	0.400247	0.571641	0.312637
658	0.336049	0.0672958	0.101659	0.102962	0.0721882	0.0881501	0.0194468	0.135682	0.0698268	0.0915703	0.109032	54.5591	0.0504006	0.424676	0.537381	0.325869
659	0.376942	0.0548578	0.120581	0.0972891	0.0747383	0.121604	0.0221795	0.137479	0.0657398	0.0869814	0.102918	54.3525	0.0573493	0.450775	0.503122	0.3391
660	0.400076	0.0670097	0.139503	0.0916158	0.0772883	0.135239	0.0272557	0.123184	0.0616528	0.0823926	0.106525	54.1459	0.0863354	0.476873	0.468863	0.352332
661	0.405452	0.0791616	0.158425	0.0901864	0.0813569	0.129056	0.0323319	0.108889	0.0576678	0.0848754	0.110132	53.9393	0.115321	0.490402	0.520762	0.342
662	0.410827	0.0913135	0.16311	0.0930009	0.0914993	0.122873	0.0362272	0.0945945	0.0540904	0.09443	0.113739	53.7588	0.12222	0.453651	0.582234	0.308104
663	0.405543	0.0828407	0.158304	0.0958154	0.101642	0.11669	0.0373672	0.106806	0.050513	0.103985	0.106278	53.5813	0.114395	0.416901	0.643705	0.274209
664	0.375387	0.0606179	0.153498	0.0986299	0.111784	0.109591	0.0385072	0.121962	0.0469355	0.108228	0.0975868	53.4037	0.106569	0.397051	0.641771	0.273889
665	0.345232	0.0383952	0.148692	0.0843363	0.100535	0.102492	0.0389508	0.134483	0.0578186	0.110195	0.0888958	53.1976	0.0991032	0.402552	0.612661	0.287959
666	0.320232	0.0161724	0.143513	0.0700428	0.080118	0.0953935	0.0331267	0.123278	0.0687016	0.112162	0.0994449	52.9487	0.0921779	0.408053	0.583552	0.302029
667	0.341634	0.0286565	0.138239	0.0557492	0.059701	0.0882513	0.0273026	0.112073	0.0795847	0.112913	0.114804	52.6998	0.0852525	0.413554	0.554386	0.298687
668	0.363035	0.0498172	0.132966	0.0552899	0.0469021	0.0810982	0.0214784	0.104521	0.0814557	0.108795	0.130163	52.4297	0.0783272	0.403671	0.524992	0.277933
669	0.384437	0.0709779	0.130879	0.0686649	0.0645758	0.0739452	0.0220851	0.111578	0.0743146	0.104677	0.138364	52.0747	0.0906193	0.389942	0.495599	0.257179
670	0.405767	0.078437	0.141538	0.0820399	0.0822495	0.0728242	0.0269791	0.118635	0.0671736	0.100559	0.141793	51.7197	0.105047	0.376214	0.466205	0.244793
671	0.427049	0.0539254	0.152198	0.0735032	0.0999232	0.0757247	0.031873	0.125692	0.0600325	0.100639	0.145222	51.3647	0.119474	0.347177	0.493881	0.237986
672	0.448332	0.0294139	0.162857	0.0555757	0.106877	0.0786252	0.0338485	0.125216	0.0624888	0.102517	0.141003	51.0622	0.126017	0.311579	0.546015	0.231178
673	0.469472	0.00490231	0.149172	0.0376483	0.109235	0.0851956	0.0314463	0.121512	0.0690582	0.104396	0.133506	50.7598	0.12918	0.275981	0.59815	0.23031
674	0.489332	0.0153117	0.125054	0.0436036	0.111594	0.0972709	0.0290441	0.117807	0.0756276	0.106274	0.12601	50.4573	0.132344	0.286531	0.650284	0.282895
675	0.509193	0.0344514	0.100936	0.0555296	0.10975	0.109346	0.0266419	0.11646	0.0725925	0.103651	0.123036	50.215	0.135465	0.308617	0.639308	0.335479
676	0.529053	0.053591	0.090087	0.0674556	0.103703	0.121421	0.0273356	0.12454	0.0599527	0.0999033	0.138157	49.9877	0.138546	0.330704	0.612554	0.388063
677	0.540021	0.0727307	0.092506	0.0793371	0.0976561	0.115994	0.0283733	0.132619	0.047313	0.0961554	0.153278	49.7604	0.141626	0.34766	0.585801	0.378331
678	0.530241	0.0770525	0.094925	0.091189	0.096379	0.108622	0.0294111	0.135528	0.0346733	0.0924074	0.168398	49.4151	0.141321	0.352645	0.559047	0.327054
679	0.52046	0.0797278	0.102642	0.103041	0.106232	0.10125	0.0292992	0.126372	0.031481	0.0995858	0.161003	48.7944	0.133119	0.35763	0.958818	0.275778
680	0.510679	0.0824032	0.122722	0.114443	0.116084	0.0892699	0.026505	0.117216	0.0282887	0.106764	0.153609	48.1736	0.124916	0.362615	1.35859	0.26529
681	0.506642	0.0813905	0.142802	0.125171	0.125937	0.0753147	0.0237108	0.108059	0.0250964	0.113942	0.146214	47.5824	0.116799	0.35451	1.75836	0.315984
682	0.511219	0.0748456	0.161099	0.135898	0.122947	0.0613594	0.0212928	0.111598	0.027802	0.11991	0.147327	47.2574	0.109447	0.340794	2.07563	0.366679
683	0.515796	0.0683008	0.163358	0.146626	0.116747	0.0474042	0.02226	0.118311	0.0393544	0.114982	0.161201	46.9325	0.102096	0.327079	1.65042	0.383481
684	0.520373	0.0617559	0.165617	0.135715	0.110546	0.0558951	0.0232273	0.125023	0.0509067	0.110055	0.175075	46.6075	0.0947447	0.330996	1.2252	0.366392
685	0.511673	0.0712998	0.167876	0.119395	0.109297	0.0699974	0.0241946	0.128537	0.0603999	0.105127	0.188949	46.3622	0.0934557	0.352548	0.799987	0.349304
686	0.501498	0.0826312	0.156601	0.103075	0.11135	0.0840998	0.0282493	0.119253	0.0616563	0.100137	0.174951	46.17	0.0962082	0.374099	0.530928	0.332215
687	0.491324	0.0939627	0.143822	0.0927688	0.113402	0.0865271	0.0326471	0.109969	0.0629127	0.0951407	0.157856	45.9778	0.0989608	0.39565	0.626234	0.305911
688	0.481149	0.102601	0.131043	0.0864716	0.115455	0.0889544	0.0370448	0.100686	0.0641691	0.0901442	0.140761	45.7745	0.101713	0.34448	0.72154	0.279607
689	0.503022	0.104954	0.121201	0.0801743	0.109064	0.0913818	0.0386842	0.0988538	0.0719299	0.085489	0.124594	45.545	0.0931422	0.293311	0.816845	0.253302
690	0.524895	0.107307	0.137788	0.0755708	0.102673	0.0928704	0.036186	0.100216	0.0796907	0.0809801	0.116776	45.3156	0.0845711	0.242141	0.753894	0.234541
691	0.546768	0.105503	0.154375	0.0862109	0.0962814	0.0859105	0.0336879	0.101578	0.0813219	0.0764712	0.108958	45.0861	0.076	0.23524	0.623119	0.227095
692	0.540107	0.0995437	0.170962	0.0968509	0.109833	0.0789507	0.0311897	0.100839	0.0768234	0.0743285	0.10114	44.9106	0.0941745	0.239406	0.492344	0.219648
693	0.526312	0.093584	0.181459	0.107491	0.128371	0.0719909	0.0396822	0.0916991	0.072325	0.0816504	0.104447	44.7487	0.119035	0.243572	0.432064	0.212201
694	0.512518	0.0876242	0.167594	0.112933	0.146909	0.0704965	0.0509224	0.0825589	0.0681987	0.0889722	0.118878	44.5867	0.143896	0.240277	0.442279	0.251389
695	0.530486	0.0811619	0.153728	0.114909	0.147144	0.0726457	0.0621625	0.0734186	0.0643205	0.0962941	0.13331	44.4247	0.148526	0.207137	0.452495	0.295759
696	0.569629	0.0743645	0.139863	0.116885	0.135177	0.0747949	0.0668438	0.07048	0.0604423	0.0920978	0.14413	44.2278	0.139668	0.173997	0.462525	0.34013
697	0.608773	0.0675671	0.135375	0.118861	0.123211	0.0738659	0.056221	0.0716758	0.0595685	0.0802229	0.146524	44.027	0.13081	0.140857	0.472122	0.402248
698	0.625816	0.0607697	0.137139	0.102038	0.111244	0.0657546	0.0455982	0.0728717	0.0657048	0.0683479	0.148917	43.8263	0.117682	0.144502	0.481719	0.476198
699	0.609708	0.0427341	0.138902	0.0852162	0.108764	0.0576433	0.036109	0.0802832	0.0718411	0.0617254	0.151311	43.7361	0.098148	0.148147	0.453293	0.550149
700	0.593601	0.0246985	0.139862	0.068394	0.110349	0.0535628	0.0368212	0.0970183	0.0774575	0.0629815	0.144415	43.6932	0.0786143	0.151792	0.367831	0.448135
700	0.792339	0.0911221	0.133392	0.0705604	0.049528	0.0400191	0.020119	0.0413598	0.0633117	0.0561466	0.103355	45.2522	0.107747	0.173604	0.37901	0.284981
699	0.789627	0.114161	0.102649	0.0821127	0.0562796	0.0384801	0.0249106	0.0486187	0.0688275	0.0551351	0.101485	45.2441	0.121108	0.216323	0.437455	0.283305
698	0.833133	0.103485	0.0719065	0.0818835	0.0652079	0.0569004	0.0295867	0.0601079	0.0671262	0.0713639	0.0995503	45.509	0.131613	0.220754	0.37451	0.273539
697	0.881773	0.0890627	0.070401	0.0803451	0.0737824	0.0775385	0.0281482	0.0720673	0.0606133	0.0895082	0.0976157	45.9559	0.142119	0.135849	0.298077	0.25838
696	0.894149	0.08395	0.0688955	0.0706907	0.0815313	0.0981765	0.0226332	0.0840266	0.0541004	0.0941324	0.0955596	46.4029	0.125588	0.0509433	0.333318	0.243221
695	0.890982	0.0928014	0.0810109	0.057558	0.0892801	0.0963375	0.0171803	0.0770991	0.0479045	0.0929623	0.0934514	46.6268	0.0685025	0.0149892	0.416419	0.253221
694	0.887815	0.101653	0.0989637	0.0455612	0.0859343	0.0944984	0.0122861	0.0701716	0.0418446	0.0917835	0.0913432	46.8508	0.0114171	0.0524622	0.49952	0.263221
693	0.875476	0.0942187	0.116917	0.0437885	0.0659464	0.0926594	0.00739182	0.0632441	0.0357846	0.0905271	0.0891114	47.0904	0.0423636	0.0899352	0.528447	0.269841
692	0.84938	0.0623566	0.127854	0.0420158	0.0459584	0.0907062	0.00406144	0.0652212	0.0322479	0.0892707	0.0868488	47.4708	0.0953182	0.11825	0.476114	0.24604
691	0.823283	0.0304945	0.137037	0.0402203	0.0443304	0.0887244	0.00698651	0.0694245	0.0312344	0.0906412	0.0871755	47.8512	0.139984	0.137408	0.42378	0.22224
690	0.849311	0.0105759	0.144018	0.0383334	0.0610621	0.0867427	0.00991159	0.0736278	0.0302209	0.102519	0.0978593	48.1376	0.151492	0.156565	0.371447	0.19844
689	0.88113	0.0384313	0.142189	0.0364465	0.0777939	0.0846474	0.0128367	0.0781397	0.032166	0.114397	0.108543	48.3299	0.163001	0.171668	0.357336	0.230061
688	0.91295	0.0662867	0.140359	0.041388	0.0834138	0.0825394	0.0199455	0.0833719	0.0410146	0.126275	0.115259	48.5222	0.136536	0.18632	0.347471	0.267839
687	0.919807	0.094142	0.131611	0.0508817	0.0816258	0.0804315	0.0275192	0.0886041	0.0498632	0.118231	0.112717	48.7713	0.0847551	0.200973	0.337607	0.282806
686	0.915967	0.0699315	0.119899	0.0603755	0.0798378	0.0657619	0.0350929	0.0938095	0.0587118	0.110186	0.110174	49.0204	0.0329741	0.202501	0.327361	0.244543
685	0.912108	0.0457209	0.108186	0.0689511	0.0903356	0.0510922	0.0299038	0.0989747	0.0626843	0.102142	0.11818	49.0608	0.0416077	0.198405	0.31695	0.206281
684	0.908092	0.0266045	0.104228	0.0775266	0.119262	0.0569017	0.0247147	0.10414	0.0666568	0.0993285	0.130706	48.7885	0.0761332	0.194308	0.318577	0.232289
683	0.904076	0.0533359	0.102209	0.0862479	0.148189	0.0934296	0.0203857	0.102806	0.0706293	0.097823	0.131412	48.5161	0.110659	0.226539	0.428544	0.354704
682	0.899973	0.0800673	0.10213	0.0955522	0.145038	0.129958	0.0194974	0.0949725	0.0659386	0.0977639	0.084838	47.0431	0.115463	0.267852	0.53851	0.477119
681	0.895784	0.0806091	0.10981	0.104856	0.133867	0.111348	0.0186091	0.0871393	0.0590821	0.10349	0.0382644	45.2699	0.112838	0.291835	0.506026	0.432741
680	0.891595	0.0782411	0.117491	0.10722	0.122697	0.0866129	0.0191124	0.0918116	0.0522256	0.109217	0.0354328	43.8847	0.117591	0.246496	0.378574	0.36983
679	0.899039	0.075826	0.125147	0.104956	0.110133	0.0618773	0.0228628	0.104821	0.056314	0.110547	0.0617626	43.4048	0.139559	0.201156	0.251123	0.307177
678	0.91424	0.0733796	0.132744	0.102692	0.0974151	0.0718261	0.0266132	0.11783	0.0616185	0.101619	0.0880924	42.9249	0.161528	0.174382	0.297541	0.244695
677	0.929441	0.0709254	0.140341	0.100367	0.0856023	0.0817749	0.0303422	0.116364	0.0642838	0.0926918	0.0982084	42.7374	0.160149	0.190927	0.34396	0.182213
676	0.93085	0.0684015	0.151822	0.0980151	0.0751476	0.0907552	0.034062	0.114898	0.0629903	0.0895779	0.108324	42.9885	0.123749	0.207471	0.366999	0.239254
675	0.926347	0.0658777	0.169128	0.0956633	0.064693	0.0982825	0.0373115	0.116642	0.0616969	0.0951848	0.115766	43.2397	0.0873482	0.203134	0.354969	0.34752
674	0.92573	0.0743232	0.186434	0.0875322	0.0579473	0.10581	0.0363281	0.121598	0.0603825	0.100792	0.099135	43.4801	0.0598796	0.177915	0.342939	0.420554
673	0.940653	0.0937383	0.188852	0.073622	0.0660379	0.111297	0.0353448	0.126554	0.0590473	0.109335	0.0825043	43.6779	0.0681387	0.152696	0.245623	0.352664
672	0.955576	0.113153	0.176383	0.0597118	0.0741284	0.108625	0.0330958	0.127601	0.057712	0.120815	0.0738419	43.8757	0.0763979	0.153338	0.13883	0.284774
671	0.971401	0.126156	0.163913	0.0790985	0.0760228	0.105953	0.0278938	0.126041	0.0598662	0.132295	0.0837721	44.0735	0.084657	0.171223	0.0320378	0.216884
670	0.989332	0.134883	0.151644	0.102185	0.0737863	0.0988483	0.0226917	0.124482	0.0643466	0.137526	0.0937023	44.0592	0.104016	0.189107	0.113067	0.203115
669	1.00726	0.14361	0.139461	0.125271	0.0715499	0.0813988	0.0191553	0.120318	0.068827	0.128177	0.0983618	44.0449	0.123375	0.184072	0.27459	0.189346
668	0.991307	0.143163	0.127278	0.130631	0.0939177	0.0654146	0.0181173	0.112248	0.0595556	0.118828	0.0951152	43.6444	0.142734	0.179036	0.41345	0.175578
667	0.96688	0.140423	0.122879	0.109399	0.122437	0.0626174	0.0170794	0.104177	0.0468461	0.116884	0.0918685	39.7676	0.144127	0.173977	0.348335	0.19644
666	0.942452	0.137683	0.120427	0.0881678	0.141101	0.0598203	0.0160304	0.102557	0.0341367	0.122345	0.0906025	35.8908	0.14103	0.168826	0.28322	0.225961
665	0.967431	0.134886	0.120235	0.072582	0.12035	0.0570231	0.0149703	0.107386	0.0485923	0.127806	0.0972589	32.0139	0.137932	0.163674	0.228463	0.255481
664	0.9979	0.132082	0.129088	0.0795781	0.0995983	0.0774796	0.0139103	0.112216	0.0660661	0.124489	0.103915	31.4223	0.16056	0.176887	0.215139	0.27195
663	1.02837	0.129278	0.137941	0.0865743	0.0814967	0.10052	0.0170206	0.117165	0.0778585	0.11532	0.110572	31.1957	0.186047	0.23295	0.201814	0.279718
662	1.00913	0.11945	0.131178	0.094468	0.0695782	0.105781	0.020131	0.122193	0.0763942	0.106152	0.117539	30.9691	0.190176	0.289013	0.194275	0.287485
661	0.968597	0.106612	0.117723	0.110439	0.0576598	0.0843731	0.0228203	0.127222	0.0749299	0.111621	0.124972	30.9853	0.162267	0.320508	0.238795	0.276025
660	0.928061	0.0937729	0.105356	0.12641	0.0642996	0.0629653	0.0217195	0.135441	0.0740484	0.123363	0.132406	31.1055	0.134358	0.315152	0.283314	0.235722
659	0.914066	0.0922836	0.102778	0.142382	0.0894979	0.0415576	0.0206187	0.144458	0.0784116	0.135105	0.139839	31.262	0.131118	0.309796	0.328899	0.195418
658	0.926613	0.102144	0.1002	0.141521	0.114696	0.0458533	0.019518	0.153474	0.0827749	0.138638	0.126776	31.564	0.152546	0.301034	0.375548	0.170212
657	0.93916	0.112004	0.118035	0.138789	0.117776	0.0530051	0.0184059	0.15575	0.0825658	0.136698	0.111437	31.866	0.173975	0.278648	0.422198	0.155069
656	0.957345	0.109055	0.149479	0.136058	0.106111	0.0601568	0.0172863	0.142296	0.0716876	0.134758	0.0960967	32.1679	0.180558	0.256262	0.512412	0.139927
655	0.988683	0.106106	0.177515	0.122628	0.0944455	0.0601972	0.0161666	0.128841	0.0608095	0.132807	0.0973305	32.6359	0.177245	0.233876	0.602627	0.148306
654	1.02002	0.103156	0.174873	0.109199	0.0952319	0.0571898	0.0150409	0.117851	0.0499314	0.130838	0.105667	33.104	0.173932	0.223287	0.670327	0.166767
653	1.04403	0.100179	0.172232	0.0978953	0.101355	0.0541825	0.0139061	0.129034	0.0465279	0.12887	0.114004	33.6153	0.159408	0.217755	0.535401	0.185227
652	1.0387	0.0971939	0.166037	0.0950937	0.107478	0.0562148	0.0127713	0.140218	0.0449931	0.126898	0.116386	34.3	0.133673	0.212222	0.400475	0.203668
651	1.03338	0.0964838	0.145629	0.092292	0.10341	0.0632867	0.0124179	0.147707	0.0434583	0.124906	0.112815	34.9847	0.107938	0.210501	0.337962	0.222089
650	1.02806	0.104872	0.125221	0.0894904	0.0925478	0.0703586	0.0151906	0.140418	0.0419185	0.122915	0.109243	35.6518	0.0963149	0.224026	0.323726	0.24051
649	1.0227	0.113261	0.104813	0.0938745	0.0816859	0.0775196	0.0179633	0.13313	0.0403667	0.120923	0.105672	36.278	0.117621	0.237551	0.309489	0.24906
648	1.01732	0.117079	0.12958	0.101338	0.0778356	0.0848885	0.020343	0.125841	0.038815	0.125738	0.115625	36.9041	0.138927	0.249159	0.295173	0.234575
647	1.01194	0.114042	0.154348	0.108802	0.0845024	0.0922575	0.0191856	0.122953	0.0383194	0.130553	0.125578	37.505	0.145724	0.243514	0.280823	0.22009
646	0.996757	0.111005	0.179115	0.115477	0.0911693	0.0975336	0.0180283	0.121165	0.0473285	0.135368	0.127578	38.0681	0.130758	0.237868	0.276871	0.210006
645	0.971779	0.107959	0.171165	0.121954	0.0892973	0.0944384	0.0168709	0.119377	0.0563376	0.140594	0.0977658	38.6311	0.115791	0.232223	0.314509	0.21753
644	0.9468	0.104902	0.159581	0.128431	0.0788865	0.0913432	0.0235188	0.128134	0.0653467	0.145865	0.0679538	39.1941	0.110997	0.245598	0.352147	0.225053
643	0.955495	0.101846	0.147997	0.129301	0.0684757	0.0913756	0.0310339	0.14392	0.0581218	0.151137	0.0570122	39.7116	0.12994	0.261086	0.374137	0.232576
642	0.986638	0.0923934	0.14261	0.126432	0.0596117	0.0987058	0.0372615	0.159706	0.050897	0.156659	0.0901019	40.1986	0.148883	0.272603	0.359615	0.318451
641	1.01778	0.0802002	0.13988	0.123564	0.0646686	0.106036	0.0319012	0.166247	0.0442366	0.162181	0.123192	40.6857	0.16175	0.24837	0.345093	0.404326
640	1.03062	0.068007	0.13715	0.144012	0.0697256	0.109425	0.0265409	0.158922	0.0426565	0.16619	0.146761	41.1727	0.119933	0.224138	0.330571	0.4902
639	1.02514	0.0594599	0.134412	0.187777	0.0747825	0.0970526	0.0228019	0.151597	0.0410765	0.164148	0.13225	41.7305	0.0781156	0.199906	0.315998	0.462988
638	1.01967	0.0654972	0.131673	0.231541	0.0802637	0.0846799	0.0255482	0.144272	0.0394965	0.162106	0.117739	42.2961	0.0570132	0.207571	0.301419	0.322689
637	1.0142	0.0715345	0.128933	0.264199	0.0860276	0.0723071	0.0282945	0.142459	0.0472773	0.160064	0.103228	42.8618	0.0842446	0.21878	0.28684	0.182389
636	1.00871	0.0775718	0.12619	0.270943	0.0917914	0.0664038	0.0306486	0.140645	0.0550581	0.167275	0.0963049	43.5618	0.111476	0.229989	0.31	0.0420898
635	1.00323	0.0772212	0.123445	0.277686	0.0942165	0.0632733	0.0294731	0.138832	0.0628389	0.178453	0.0926332	44.3193	0.138707	0.234421	0.349333	0.0370325
634	1.00483	0.0741328	0.120701	0.286621	0.0916334	0.0601427	0.0282976	0.137018	0.0635952	0.18963	0.0889614	45.0769	0.13243	0.228686	0.388666	0.0899361
633	1.0348	0.0710445	0.117956	0.30432	0.0890502	0.0661152	0.0271221	0.135203	0.057327	0.194196	0.0908722	45.7793	0.117776	0.222951	0.336971	0.14284
632	1.06476	0.0734291	0.11521	0.32202	0.0864671	0.0730991	0.0259467	0.133388	0.0510589	0.192149	0.0983654	46.2608	0.103122	0.217216	0.275162	0.195743
631	1.09472	0.0885838	0.112464	0.350878	0.0762567	0.0800831	0.0247713	0.131574	0.0447907	0.190102	0.105859	46.7424	0.0951827	0.228421	0.213354	0.224914
630	1.08924	0.103739	0.102626	0.405771	0.0660464	0.0872979	0.023596	0.12976	0.0480271	0.191079	0.112236	47.224	0.0917206	0.239626	0.184595	0.254084
629	1.08376	0.118893	0.0897482	0.460664	0.0558361	0.0946117	0.0224215	0.127947	0.0512634	0.19659	0.10857	47.8677	0.0882586	0.25083	0.169999	0.283255
628	1.07827	0.11946	0.0768702	0.517063	0.0537495	0.101925	0.0212482	0.126136	0.0544998	0.202102	0.104903	48.5519	0.0963512	0.253573	0.155404	0.335972
627	1.0728	0.116379	0.0950125	0.579487	0.0597865	0.109048	0.020075	0.124326	0.0548466	0.203084	0.101237	49.2361	0.115998	0.247855	0.172078	0.394577
626	1.06734	0.113298	0.116602	0.64191	0.0658236	0.116044	0.0202047	0.122515	0.053267	0.201044	0.0975746	49.8724	0.135645	0.242136	0.209598	0.453181
625	1.06187	0.117209	0.138191	0.704333	0.0757846	0.12304	0.0233749	0.131965	0.0516873	0.199005	0.0939207	50.5034	0.146056	0.236425	0.247118	0.449843
624	1.05641	0.124115	0.157378	0.768874	0.0916314	0.125994	0.0265451	0.146239	0.0524514	0.196969	0.0902669	51.1345	0.142613	0.230726	0.316428	0.446504
623	1.05097	0.131021	0.172963	0.833415	0.107478	0.122887	0.0275478	0.160514	0.056731	0.194938	0.0889892	51.7858	0.139169	0.225026	0.399363	0.438832
622	1.04552	0.122649	0.188547	0.897956	0.108783	0.11978	0.026383	0.170365	0.0610105	0.192907	0.0972159	52.4573	0.126497	0.231194	0.482297	0.413825
621	1.04616	0.0989982	0.201304	1.01247	0.0955469	0.113643	0.0252183	0.16252	0.0589738	0.190879	0.105443	53.1289	0.111518	0.24923	0.506814	0.388818
620	1.061	0.0753478	0.207463	1.13254	0.0823103	0.100437	0.0252316	0.154675	0.0527261	0.188858	0.113669	53.8563	0.0965389	0.267265	0.492385	0.363811
619	1.07584	0.0690635	0.213622	1.25261	0.0606952	0.0872306	0.0279936	0.147436	0.0464785	0.186837	0.110055	54.714	0.0896596	0.223377	0.477956	0.286162
618	1.08057	0.0888285	0.21991	1.38799	0.0390801	0.0750381	0.0307556	0.145653	0.0407002	0.194741	0.106441	55.5717	0.0862517	0.179488	0.485153	0.208513
617	1.07518	0.108594	0.227353	1.53869	0.0228535	0.0719684	0.0327353	0.143871	0.039146	0.212568	0.102827	56.3966	0.0828439	0.1356	0.513975	0.150215
616	1.0698	0.11469	0.234796	1.68938	0.0281809	0.0688988	0.0315858	0.142088	0.0375918	0.230396	0.105738	57.0905	0.07945	0.143376	0.542798	0.169315
615	1.07542	0.111674	0.246717	1.84008	0.0335084	0.0658291	0.0304364	0.149444	0.0360377	0.240411	0.113	57.7845	0.0760655	0.156893	0.571621	0.188415
614	1.08837	0.108658	0.269086	2.03921	0.0388359	0.0913467	0.029287	0.157816	0.0397825	0.232197	0.120262	58.4815	0.072681	0.17041	0.503466	0.207448
613	1.10132	0.116921	0.291455	2.23835	0.0501055	0.116864	0.0281461	0.166188	0.0435273	0.223982	0.125217	59.2063	0.0782703	0.198306	0.435311	0.225876
612	1.12344	0.1421	0.313824	2.43749	0.0628606	0.142382	0.0270073	0.171325	0.0472721	0.215768	0.109418	59.9312	0.0861031	0.229796	0.397456	0.244304
611	1.15474	0.167278	0.335573	2.6666	0.0756158	0.15633	0.0258685	0.163523	0.0420579	0.223195	0.0936196	60.656	0.0939359	0.261287	0.480801	0.262732
610	1.18603	0.192457	0.357254	2.9157	0.0838018	0.162566	0.0247334	0.155722	0.0358484	0.232361	0.0778207	61.4761	0.0887562	0.270583	0.564145	0.231456
609	1.19461	0.168904	0.378934	3.1648	0.0813264	0.168801	0.0236068	0.148527	0.0296388	0.241526	0.0743047	62.3069	0.0749016	0.265082	0.633787	0.194657
608	1.1691	0.14535	0.394236	3.44413	0.0788511	0.176019	0.0224802	0.146795	0.0274237	0.250203	0.0707886	63.1377	0.061047	0.259581	0.580108	0.157858
607	1.1436	0.121796	0.399969	3.76879	0.0763758	0.192082	0.0213536	0.145062	0.0312001	0.254479	0.0672726	63.9437	0.0562367	0.254093	0.526428	0.183759
606	1.15945	0.125019	0.405702	4.09345	0.0739245	0.208145	0.0202386	0.14333	0.0349766	0.258755	0.0800498	64.7249	0.0876037	0.248657	0.472749	0.225335
605	1.20288	0.131216	0.411435	4.43317	0.071476	0.224208	0.0191248	0.165731	0.0403442	0.263032	0.103689	65.506	0.118971	0.243221	0.460277	0.26691
604	1.24631	0.137413	0.424195	4.808	0.0681689	0.245343	0.018011	0.190814	0.0494247	0.267325	0.127329	66.2922	0.145721	0.237785	0.543957	0.291463
603	1.28822	0.143733	0.436956	5.18283	0.057135	0.26865	0.0252414	0.212615	0.0585051	0.271627	0.120631	67.1234	0.130924	0.218858	0.627637	0.30872
602	1.31647	0.150238	0.449717	5.55765	0.0461012	0.291958	0.0345578	0.20487	0.0635467	0.275928	0.106349	67.9546	0.116126	0.196558	0.683704	0.325976
601	1.34471	0.156743	0.467617	6.01944	0.0350674	0.315265	0.0438741	0.197125	0.0524328	0.280184	0.0920673	68.7857	0.101329	0.174258	0.629316	0.325229
600	1.37296	0.163248	0.497509	6.49089	0.0243346	0.337928	0.0477184	0.189381	0.041319	0.284335	0.0844043	69.6469	0.0869352	0.168535	0.574928	0.282473
599	1.45302	0.160405	0.527401	6.96234	0.0136018	0.360591	0.0387943	0.204262	0.0302051	0.288486	0.0921854	70.5779	0.0725415	0.20149	0.520541	0.239717
598	1.55529	0.157563	0.557293	7.49919	0.00286905	0.383254	0.0298702	0.219142	0.0352793	0.292636	0.0999664	71.5089	0.0581477	0.234444	0.506548	0.196961
597	1.65755	0.154721	0.58324	8.10146	0.0176871	0.40272	0.0232321	0.234023	0.0444005	0.297434	0.107748	72.4399	0.0611695	0.259765	0.53295	0.218616
596	1.75982	0.168806	0.6082	8.70373	0.0388928	0.409396	0.0257383	0.235358	0.0535217	0.302393	0.105527	73.4607	0.0685452	0.254552	0.559352	0.256375
595	2.06832	0.194176	0.633161	9.306	0.0600986	0.416071	0.0282444	0.227662	0.0650908	0.307352	0.102196	74.4916	0.0759209	0.249339	0.585755	0.294133
594	2.37682	0.219546	0.651739	10.2163	0.0750376	0.422747	0.0307505	0.219966	0.0777089	0.307554	0.0988639	75.5224	0.0837243	0.244134	0.584491	0.311504
593	2.68532	0.244925	0.667583	11.2585	0.0805764	0.444694	0.0304117	0.223585	0.090327	0.305717	0.107806	76.5035	0.0921691	0.239004	0.57137	0.298293
592	3.08445	0.270343	0.683426	12.3007	0.0861152	0.470459	0.0293617	0.238517	0.107228	0.303881	0.129021	77.435	0.100614	0.233874	0.55825	0.285081
591	3.84608	0.295761	0.697515	13.5142	0.091654	0.496224	0.0283117	0.25345	0.14126	0.310243	0.150236	78.3665	0.105609	0.228744	0.571915	0.27187
590	4.6077	0.321178	0.710433	15.1272	0.0893809	0.523114	0.0301285	0.26673	0.175293	0.335739	0.176371	79.3072	0.102556	0.248087	0.603436	0.258713
589	5.36933	0.316591	0.723351	16.7402	0.0871079	0.551691	0.0362456	0.26514	0.209325	0.361234	0.209886	80.3305	0.0995028	0.277917	0.634957	0.245555
588	6.48878	0.304502	0.736269	18.3532	0.0848349	0.580268	0.0423627	0.26355	0.256985	0.384005	0.243401	81.3538	0.0964495	0.307748	0.657639	0.232398
587	7.96604	0.292413	0.7519	20.2745	0.0929222	0.602318	0.0484797	0.26196	0.318272	0.395881	0.29606	82.3771	0.11087	0.321917	0.64496	0.249886
586	9.44331	0.288219	0.767833	22.2299	0.107916	0.60914	0.0435476	0.27855	0.37956	0.407756	0.393388	83.5581	0.127233	0.29954	0.632281	0.287805
585	11.3087	0.295867	0.783765	24.1854	0.122911	0.615962	0.0386154	0.29514	0.443571	0.42076	0.490716	84.7391	0.143595	0.277164	0.636026	0.325723
584	13.7563	0.303515	0.811797	26.4138	0.150845	0.622784	0.0336832	0.31173	0.532096	0.443911	0.588043	85.92	0.156099	0.254788	0.664406	0.366743
583	16.204	0.320446	0.842853	28.9151	0.191718	0.630482	0.0419468	0.326906	0.62062	0.467062	0.695478	87.1012	0.153169	0.265398	0.692787	0.420167
582	18.6516	0.359037	0.873909	31.4164	0.232592	0.638278	0.0516765	0.341925	0.709145	0.490213	0.804036	88.2825	0.150239	0.279674	0.721167	0.47359
581	22.167	0.397628	0.909938	33.9769	0.282238	0.646073	0.0614062	0.356944	0.781835	0.517745	0.912593	89.4637	0.147309	0.293949	0.789364	0.527014
580	25.6823	0.433625	0.953426	36.6261	0.345039	0.678971	0.0657858	0.373844	0.854525	0.547156	1.01434	90.6351	0.169704	0.293002	0.874625	0.561717
579	29.1977	0.459246	0.996914	39.2753	0.407841	0.718144	0.0648155	0.392625	0.927216	0.576566	1.10927	91.7669	0.198432	0.28825	0.959886	0.5777
578	33.7041	0.484867	1.04042	41.9245	0.470643	0.757316	0.0638451	0.411405	0.994053	0.604121	1.20421	92.8986	0.227159	0.283499	0.986838	0.593683
577	38.8711	0.510488	1.08395	45.726	0.538533	0.793948	0.0628748	0.430186	1.06024	0.627346	1.29124	94.0304	0.255912	0.31543	0.974917	0.609666
576	44.0382	0.528643	1.12749	49.5274	0.608603	0.829491	0.0650579	0.447293	1.12643	0.650572	1.36643	95.4259	0.284703	0.363083	0.962996	0.61965
575	49.5255	0.544933	1.17286	53.3288	0.678674	0.865035	0.0680295	0.463982	1.17661	0.673797	1.44162	96.8872	0.313495	0.410735	0.970616	0.628133
574	56.2941	0.561222	1.2256	58.0057	0.748744	0.9017	0.071001	0.480671	1.21078	0.71946	1.51681	98.3486	0.342287	0.442729	1.0564	0.636617
573	63.0628	0.590618	1.27833	62.7798	0.77254	0.940986	0.0684989	0.497382	1.24495	0.767616	1.58738	99.7388	0.360613	0.438183	1.14218	0.63731
572	69.8314	0.639675	1.3316	67.5539	0.796335	0.980271	0.063651	0.514102	1.27912	0.815772	1.65796	101.099	0.378939	0.433637	1.21825	0.634663
571	78.0183	0.688731	1.38966	72.1524	0.820131	1.01748	0.0588031	0.530822	1.32738	0.84839	1.72853	102.458	0.397265	0.425287	1.20687	0.632017
570	86.5599	0.722357	1.44772	76.7071	0.85172	1.04638	0.064131	0.558453	1.37917	0.865471	1.80691	103.818	0.447226	0.401721	1.1955	0.636104
569	95.1014	0.71998	1.50577	81.2617	0.884174	1.07528	0.0762429	0.593359	1.43096	0.882552	1.88616	105.499	0.518278	0.378155	1.18412	0.655904
568	104.026	0.717603	1.57708	85.6156	0.916629	1.10542	0.0883547	0.628264	1.48937	0.902899	1.96541	107.179	0.58933	0.358308	1.21314	0.675703
567	113.047	0.724626	1.65169	89.6684	0.953201	1.1468	0.092927	0.656068	1.5577	0.952643	2.05083	108.86	0.660396	0.371933	1.30273	0.691039
566	122.068	0.769253	1.72631	93.7212	0.990803	1.18818	0.0956143	0.67677	1.62602	1.00239	2.16095	110.65	0.731517	0.385559	1.39233	0.688522
565	130.491	0.81388	1.80661	97.774	1.02704	1.22956	0.0983016	0.697473	1.69174	1.05213	2.27106	112.514	0.802637	0.399184	1.49075	0.686005
564	138.017	0.858508	1.93813	100.344	1.05097	1.27505	0.102809	0.717535	1.73395	1.09074	2.38117	114.378	0.873758	0.412477	1.60241	0.683488
563	145.542	0.888844	2.06965	102.544	1.0749	1.3267	0.110046	0.731839	1.77616	1.12657	2.51697	116.242	0.92936	0.425688	1.71406	0.695073
562	153.068	0.915608	2.20117	104.743	1.09883	1.37835	0.117282	0.746142	1.81837	1.1624	2.67847	118.21	0.981082	0.438899	1.82572	0.720761
561	160.204	0.942372	2.33537	106.943	1.16587	1.43001	0.122602	0.760446	1.85815	1.19813	2.83996	120.19	1.0328	0.445185	1.82546	0.746448
560	166.756	0.9676	2.47071	108.297	1.23291	1.45955	0.125045	0.776333	1.89687	1.23369	3.00146	122.17	1.09131	0.441083	1.77724	0.772135
559	173.308	0.991292	2.60606	109.441	1.29995	1.48357	0.127489	0.793805	1.9356	1.26926	3.19734	124.344	1.15659	0.436982	1.72902	0.752248
558	179.86	1.01498	2.77458	110.585	1.36998	1.50759	0.129932	0.811276	1.97433	1.30482	3.40182	126.711	1.22188	0.432881	1.6808	0.720968
557	184.394	1.03867	2.96523	111.678	1.44033	1.5347	0.134349	0.828748	2.00697	1.33932	3.6063	129.079	1.28717	0.417655	1.72143	0.689687
556	188.928	1.06726	3.15587	112.322	1.51069	1.58966	0.139612	0.847001	2.03961	1.37222	3.82452	131.447	1.35729	0.397662	1.80014	0.674408
555	193.462	1.09706	3.3645	112.965	1.5828	1.64463	0.144875	0.866036	2.07225	1.40511	4.05648	134.087	1.42863	0.377669	1.87884	0.723131
554	196.861	1.12686	3.57761	113.609	1.66196	1.69959	0.150137	0.885071	2.09286	1.43801	4.28845	136.795	1.49997	0.357676	1.95845	0.771853
553	199.504	1.15667	3.79073	114.146	1.74112	1.7346	0.153465	0.904106	2.10544	1.47306	4.51901	139.503	1.56712	0.353834	2.04015	0.820576
552	202.148	1.19855	4.04662	114.523	1.82027	1.76107	0.155964	0.919118	2.11803	1.50902	4.737	142.517	1.628	0.349991	2.12185	0.820376
551	204.791	1.24344	4.34529	114.9	1.91147	1.78754	0.158463	0.933125	2.13062	1.54499	4.95499	145.838	1.68888	0.346149	2.20355	0.807945
550	206.405	1.28834	4.64395	115.278	2.00401	1.82311	0.160962	0.947131	2.14731	1.57747	5.17298	149.158	1.74976	0.342344	2.24272	0.795514
549	208.02	1.32512	4.94325	115.548	2.09654	1.87994	0.163578	0.961895	2.16399	1.60178	5.40069	152.747	1.78007	0.338626	2.28189	0.787191
548	209.635	1.34974	5.2483	115.772	2.19367	1.93676	0.166195	0.983468	2.18068	1.6261	5.6284	156.738	1.81038	0.334908	2.32107	0.78503
547	210.794	1.37437	5.55334	115.996	2.29537	1.99358	0.168811	1.00504	2.19784	1.65042	5.85611	160.729	1.8407	0.33119	2.31664	0.78287
546	211.651	1.39899	5.85838	116.148	2.39708	2.0297	0.171518	1.02662	2.21612	1.68648	6.07132	164.813	1.88513	0.362459	2.30738	0.780736
545	212.507	1.44357	6.17488	116.19	2.51087	2.06582	0.174358	1.04455	2.23441	1.72253	6.28117	169.733	1.93562	0.393729	2.29811	0.778642
544	213.104	1.49314	6.50857	116.232	2.64277	2.10194	0.177199	1.06158	2.25269	1.75858	6.49102	174.652	1.98611	0.424998	2.36962	0.776548
543	213.441	1.54271	6.84226	116.274	2.77467	2.13143	0.18004	1.0786	2.27153	1.78918	6.6904	179.572	2.02734	0.435418	2.46132	0.774454
542	213.778	1.56942	7.17539	116.272	2.91176	2.15651	0.185901	1.10226	2.29043	1.81615	6.86534	185.347	2.04695	0.431938	2.55302	0.772426
541	213.92	1.58635	7.50356	116.271	3.05663	2.18158	0.191762	1.12875	2.30933	1.84312	7.04028	191.488	2.06655	0.428458	2.52122	0.770399
540	213.866	1.60327	7.83173	116.269	3.2015	2.20666	0.197623	1.15524	2.32696	1.87558	7.21569	197.629	2.08616	0.425014	2.45856	0.768372
539	213.813	1.62096	8.15991	116.223	3.34785	2.24292	0.20373	1.17518	2.34375	1.91172	7.39219	204.066	2.11573	0.421654	2.39589	0.775791
538	213.737	1.64045	8.50065	116.178	3.49765	2.27917	0.210413	1.17981	2.36053	1.94785	7.56869	210.63	2.1453	0.418293	2.52474	0.78321
537	213.459	1.65994	8.86026	116.132	3.64746	2.31542	0.217096	1.18444	2.37732	1.98294	7.74519	217.193	2.17487	0.414933	2.65359	0.790629
536	213.181	1.68176	9.21987	116.048	3.78829	2.36123	0.223779	1.18907	2.39607	2.01384	7.90334	223.858	2.19204	0.411679	2.78245	0.811027
535	212.903	1.70905	9.57941	115.938	3.9082	2.41342	0.223121	1.21648	2.41504	2.04473	8.05945	230.762	2.20094	0.408437	2.78336	0.861708
534	212.498	1.73634	9.93838	115.827	4.02812	2.4656	0.222463	1.24388	2.43401	2.07563	8.21556	237.666	2.20984	0.405196	2.72944	0.91239
533	212.061	1.76362	10.2973	115.715	4.14803	2.50259	0.221805	1.27129	2.46328	2.1086	8.36779	244.57	2.22182	0.411641	2.67552	0.963071
532	211.624	1.79012	10.6563	115.598	4.27228	2.52944	0.223665	1.29041	2.49943	2.14179	8.51095	251.152	2.24101	0.424544	2.67557	0.910235
531	211.141	1.81662	11.0328	115.481	4.39653	2.5563	0.226606	1.30599	2.53557	2.17498	8.65411	257.595	2.26019	0.437447	2.75656	0.8574
530	210.588	1.84311	11.4355	115.352	4.52078	2.58177	0.229546	1.32156	2.56316	2.20783	8.79727	264.038	2.27937	0.45035	2.83755	0.804564
529	210.035	1.87016	11.8382	115.179	4.65423	2.60171	0.234736	1.3353	2.58219	2.23932	8.93325	270.48	2.29919	0.465111	2.91854	0.805513
528	209.474	1.89758	12.24	115.006	4.79381	2.62164	0.245173	1.34478	2.60122	2.2708	9.06843	276.834	2.31909	0.480079	3.00253	0.842318
527	208.841	1.92499	12.6327	114.832	4.93338	2.64602	0.255611	1.35427	2.62423	2.30228	9.2036	283.187	2.33898	0.495047	3.08651	0.879123
526	208.208	1.94851	13.0255	114.664	5.07296	2.68819	0.266048	1.36375	2.66316	2.33087	9.33185	289.54	2.35975	0.489698	3.17049	0.915928
525	207.575	1.96293	13.4182	114.495	5.15827	2.73035	0.272611	1.38726	2.70209	2.35273	9.44391	294.611	2.38111	0.470805	3.22171	0.904052
524	206.94	1.97735	13.7934	114.327	5.24358	2.77251	0.279173	1.41677	2.74102	2.37458	9.55597	299.133	2.40247	0.451911	3.25887	0.892175
523	206.304	1.99177	14.1509	114.158	5.32889	2.79774	0.285736	1.44629	2.75289	2.39643	9.66803	303.655	2.42316	0.433018	3.29604	0.880299
522	205.667	2.00723	14.5085	113.987	5.41494	2.80604	0.288024	1.47581	2.76176	2.42382	9.78708	308.177	2.44319	0.444818	3.34743	0.874586
521	205.03	2.02511	14.8672	113.816	5.50271	2.81433	0.287462	1.48632	2.77063	2.4549	9.92243	312.514	2.46322	0.46003	3.43201	0.872982
520	204.392	2.04299	15.2357	113.631	5.59048	2.82499	0.2869	1.49683	2.79063	2.48598	10.0578	316.852	2.48326	0.475241	3.51658	0.871377
519	203.753	2.06086	15.6041	113.431	5.67825	2.84512	0.291205	1.50733	2.82176	2.51627	10.1931	321.19	2.50335	0.479742	3.60116	0.887138
518	203.115	2.08847	15.9726	113.23	5.74989	2.86524	0.306868	1.51787	2.85289	2.54472	10.297	324.927	2.52345	0.477103	3.50295	0.94342
517	202.471	2.11609	16.3068	113.025	5.82153	2.88754	0.32253	1.52841	2.88403	2.57317	10.3873	328.665	2.54354	0.474464	3.40475	0.999701
516	201.826	2.1437	16.6323	112.815	5.89317	2.91851	0.335769	1.53895	2.89544	2.60162	10.4777	332.403	2.54417	0.477785	3.30654	1.0348
515	201.18	2.16458	16.9579	112.604	5.9824	2.94948	0.343351	1.54996	2.90467	2.62598	10.5763	335.494	2.54263	0.495011	3.37832	1.02046
514	200.58	2.18257	17.305	112.404	6.07917	2.98184	0.350933	1.56168	2.9139	2.64859	10.6872	338.309	2.54109	0.512238	3.52295	1.00613
513	199.992	2.20057	17.6736	112.212	6.17594	3.01973	0.357267	1.57339	2.92876	2.6712	10.798	341.123	2.55391	0.523569	3.66758	0.991825
512	199.403	2.21497	18.0422	112.021	6.24038	3.05763	0.360688	1.58453	2.94736	2.68399	10.8805	343.874	2.57631	0.521143	3.73777	0.977543
511	198.816	2.22398	18.3972	111.822	6.29098	3.09552	0.36411	1.5948	2.96597	2.69677	10.9508	346.598	2.59871	0.518717	3.77606	0.963262
[truncated: 461 more rows]

## Sheet: Hysteresis
Depth (mcd)	Median Age (ka)	Mean Age (ka)	Age -95.4% (ka)	Age -68.2% (ka)	Age +68.2% (ka)	Age +95.4% (ka)	Ms	Mr	Hc	Hcr	Mr/Ms	Hcr/Hc	Mr/X 103	ARM40/ARM
[truncated: 54 more rows]
